# Supplementary material for: Causal associations between human plasma proteins and prostate cancer identified by proteome-wide Mendelian randomization
Source: eLife. 2025 Nov 17;14:RP101584. doi: 10.7554/eLife.101584 (PMC12622964; doi:10.7554/eLife.101584)
Supplement: Supplementary file 1. — (A) Results of genome-wide significant hits and assessment of heterogeneity in meta-analysis. (B) Cross-phenotype associations with PC from iCPAGdb. (C) Full results of the proteome-wide MR in deCODE including coloc and sensitivity analyses. (D) Full results of the proteome-wide MR in UKB_PPP including coloc and sensitivity analyses. (E) Results comparison between proteins significant in either dataset or in both. (F) OpenTargets drug targets. [file elife-101584-supp1.xlsx]

## Sheet: Summary
Supplementary File 1A	Results of genome-wide significant hits and assessment of heterogenetity in meta-analysis
Supplementary File 1B	Cross-phenotype associations with PC from iCPAGdb
Supplementary File 1C	Full results of the proteome-wide MR in deCODE including coloc and sensitivity analyses
Supplementary File 1D	Full results of the proteome-wide MR in UKB_PPP including coloc and sensitivity analyses
Supplementary File 1E	Results comparison between proteins significant in either dataset or in both
Supplementary File 1F	OpenTargets drug targets

## Sheet: Supplementary File 1A
SNP	Chromosome	BP	Effect allele	Other allele	EAF	SE (EAF)	Beta	SE (beta)	P-value	Direction	HetISq	HetChiSq	HetDf	HetPVal
rs7812894	8	128520479	a	t	0.1279	0.0309	0.375549	0.0098151	0	++	90.1	10.0644	1	0.001512
rs4242384	8	128518554	a	c	0.8721	0.031	-0.374772	0.0098141	0	--	90.2	10.171	1	0.001427
rs4314621	8	128518015	a	g	0.8721	0.0309	-0.374617	0.0098144	0	--	90.1	10.1227	1	0.001465
rs11986220	8	128531689	a	t	0.1275	0.0314	0.376424	0.0098686	0	++	88.8	8.92051	1	0.00282
rs10090154	8	128532137	t	c	0.1264	0.0302	0.374899	0.0098336	0	++	88.2	8.45344	1	0.003644
rs9297759	8	128519171	a	c	0.1268	0.03	0.374072	0.009833	0	++	89.3	9.35882	1	0.002219
rs10808558	8	128501150	a	g	0.1284	0.0313	0.37297	0.0098074	0	++	89.9	9.87455	1	0.001676
rs7814837	8	128522202	t	g	0.1267	0.03	0.373707	0.0098331	0	++	89.3	9.30321	1	0.002288
rs7812429	8	128520173	a	g	0.1267	0.03	0.373602	0.0098329	0	++	89.3	9.38499	1	0.002188
rs7832031	8	128516952	a	g	0.1266	0.0301	0.373562	0.0098325	0	++	89.5	9.52242	1	0.00203
rs11393128	8	128515775	a	at	0.1292	0.0317	0.372106	0.0098025	0	++	89.4	9.44954	1	0.002112
rs4242382	8	128517573	a	g	0.1273	0.0297	0.373199	0.0098324	0	++	89.4	9.4678	1	0.002091
rs13255059	8	128530616	a	g	0.1265	0.0303	0.374952	0.0098871	0	++	88.4	8.59276	1	0.003375
rs4582524	8	128528435	c	g	0.8734	0.0303	-0.37482	0.0098873	0	--	88.3	8.5679	1	0.003421
rs4871024	8	128499911	t	c	0.1292	0.0309	0.370211	0.009803	0	++	90.8	10.8937	1	0.0009649
rs7824868	8	128524414	t	c	0.1308	0.0273	0.36474	0.0097191	3.2e-308	++	92.5	13.2988	1	0.0002656
rs7824776	8	128533442	t	c	0.8705	0.0314	-0.364635	0.0098058	1.16e-302	--	91.2	11.3988	1	0.0007349
rs11995378	8	128496412	a	g	0.1289	0.0298	0.364556	0.0098135	4.66e-302	++	91.6	11.8398	1	0.0005798
rs4431561	8	128498504	t	c	0.1292	0.03	0.363051	0.0098132	1.31e-299	++	91	11.1629	1	0.0008345
rs7826179	8	128489199	t	c	0.1311	0.0337	0.359665	0.0097717	1.44e-296	++	72.7	3.66705	1	0.0555
rs6470519	8	128484223	a	c	0.1314	0.0335	0.359619	0.0097715	1.66e-296	++	72.1	3.58885	1	0.05817
rs4871801	8	128483914	t	c	0.1315	0.0335	0.359527	0.0097709	2.18e-296	++	71.7	3.539	1	0.05994
rs6470520	8	128484333	t	c	0.1315	0.0334	0.359457	0.0097715	3.06e-296	++	71.9	3.55584	1	0.05934
rs6470518	8	128484181	a	g	0.8685	0.0335	-0.359397	0.009771	3.55e-296	--	72	3.57648	1	0.0586
rs7818556	8	128484399	a	g	0.8684	0.0334	-0.359098	0.0097699	9.51e-296	--	71.2	3.47025	1	0.06248
rs4871802	8	128485640	a	c	0.8685	0.0333	-0.359101	0.0097733	1.5e-295	--	72.9	3.68837	1	0.05479
rs10109700	8	128485964	a	g	0.1317	0.0334	0.358985	0.0097713	1.77e-295	++	73.6	3.78559	1	0.0517
rs1447295	8	128485038	a	c	0.1317	0.0334	0.358838	0.009771	2.92e-295	++	73.4	3.75927	1	0.05252
rs1447296	8	128495359	t	c	0.1323	0.033	0.352262	0.0097175	9.8e-288	++	81.5	5.40055	1	0.02013
rs1447292	8	128472642	t	c	0.13	0.0324	0.356385	0.0098609	5.09e-286	++	62.2	2.6459	1	0.1038
rs7837688	8	128539360	t	g	0.1281	0.0309	0.349357	0.0098215	3.98e-277	++	82.6	5.75678	1	0.01643
rs7843031	8	128533473	t	c	0.1262	0.0281	0.351105	0.0099241	3.6e-274	++	74.7	3.95132	1	0.04683
rs6470529	8	128544812	c	g	0.8718	0.0309	-0.35072	0.0099425	1.43e-272	--	83.5	6.05607	1	0.01386
rs4871813	8	128547942	t	g	0.1267	0.031	0.352905	0.0100607	1.49e-269	++	80.5	5.12246	1	0.02362
rs4242385	8	128529229	t	g	0.8492	0.0345	-0.319015	0.0092252	4.93e-262	--	93.5	15.4076	1	8.664e-05
rs11988857	8	128531873	a	g	0.8502	0.0333	-0.318419	0.0092404	3.24e-260	--	92.9	14.0943	1	0.0001739
rs4498506	8	128529033	a	t	0.15	0.0333	0.317848	0.0092391	2.32e-259	++	93	14.353	1	0.0001515
rs4297007	8	128529116	a	g	0.8503	0.0334	-0.317534	0.0092395	7.82e-259	--	93.1	14.5717	1	0.0001349
rs4641026	8	128528533	a	g	0.8502	0.0333	-0.317427	0.0092398	1.21e-258	--	93.2	14.6842	1	0.0001271
rs11992171	8	128529933	a	c	0.8391	0.0327	-0.301784	0.0090236	3.18e-245	--	94.7	18.8101	1	1.444e-05
rs9297760	8	128523172	a	g	0.1613	0.0315	0.292599	0.0089695	2.03e-233	++	94.5	18.0309	1	2.173e-05
rs7017300	8	128525268	a	c	0.8387	0.0314	-0.292133	0.008971	1.32e-232	--	94.6	18.5053	1	1.694e-05
rs10088308	8	128522914	t	c	0.8386	0.0315	-0.292044	0.0089705	1.73e-232	--	94.6	18.3774	1	1.812e-05
rs4531012	8	128534361	a	g	0.8492	0.0339	-0.300219	0.0092914	4.81e-229	--	89.6	9.65042	1	0.001893
rs4599771	8	128534230	a	g	0.8493	0.0339	-0.299882	0.009291	1.49e-228	--	89.8	9.80184	1	0.001743
rs9656967	8	128534587	a	t	0.8493	0.034	-0.299835	0.0092909	1.74e-228	--	89.9	9.85235	1	0.001696
rs4645527	8	128533993	a	g	0.8485	0.0348	-0.298683	0.0092866	5.88e-227	--	89.1	9.13368	1	0.002509
rs7841251	8	128524321	a	g	0.8278	0.0295	-0.275795	0.0087666	3.1e-217	--	95.3	21.2912	1	3.945e-06
rs3956790	8	128479527	t	g	0.8301	0.0385	-0.279425	0.0088955	1.39e-216	--	89.5	9.5087	1	0.002045
rs3999775	8	128479537	t	c	0.1699	0.0385	0.279271	0.0088955	2.39e-216	++	89.5	9.55387	1	0.001995
rs9656816	8	128534654	a	g	0.8998	0.0176	-0.337028	0.0108318	1.52e-212	--	0	0.617534	1	0.432
rs4871812	8	128547721	a	g	0.207	0.0206	0.257511	0.0083792	2.12e-207	++	97	33.5444	1	6.966e-09
rs77541621	8	128077146	a	g	0.0246	0.0005	0.592657	0.0195059	9.08e-203	++	0	0.0284219	1	0.8661
rs6983267	8	128413305	t	g	0.4858	0.0057	-0.201909	0.0067942	4.53e-194	--	0	0.140186	1	0.7081
rs183373024	8	128104117	a	g	0.9834	0	-1.23257	0.0423175	1.65e-186	?-	0	0	0	1
rs386729825	8	128532399	a	g	0.1047	0	0.3539	0.0122	5.19e-185	+?	0	0	0	1
rs188140481	8	128191672	a	t	0.0152	0	1.28323	0.0443657	5.97e-184	?+	0	0	0	1
rs12682374	8	128410948	c	g	0.5022	0.0003	0.19561	0.0067919	2.11e-182	++	0	0.224144	1	0.6359
rs5894888	8	128546921	g	gt	0.2578	0.0161	0.225894	0.0079093	2.08e-179	++	96.8	31.2457	1	2.274e-08
rs1489324073	8	128494481	c	g	0.107	0	0.3442	0.0121	5.42e-178	+?	0	0	0	1
rs10505477	8	128407443	a	g	0.5012	0.001	0.192965	0.0067913	1.37e-177	++	0	0.404017	1	0.525
rs1428102803	8	128205878	t	g	0.0163	0	1.21768	0.0433679	1.82e-173	?+	0	0	0	1
rs4543510	8	128545619	a	g	0.2583	0.0205	0.21621	0.0077427	1.35e-171	++	96.8	31.5503	1	1.943e-08
rs879777667	8	128535635	a	g	0.1058	0	0.3337	0.0121	2.01e-167	+?	0	0	0	1
rs922095727	8	128534755	t	c	0.8935	0	-0.3309	0.0121	1.17e-164	-?	0	0	0	1
rs1269213982	8	128545001	ca	c	0.1056	0	0.3334	0.0123	8.44e-162	+?	0	0	0	1
rs138042437	8	128208369	a	g	0.9828	0	-1.16004	0.0428267	1.41e-161	?-	0	0	0	1
rs10956373	8	128490576	t	c	0.7698	0.0338	-0.206167	0.0079358	8.45e-149	--	94.9	19.5092	1	1.001e-05
rs10993994	10	51549496	t	c	0.383	0	0.2075	0.008	2.52e-148	+?	0	0	0	1
rs2166689	8	128478315	t	g	0.7679	0.0345	-0.205564	0.0079279	3.11e-148	--	95.7	23.2962	1	1.389e-06
rs1016343	8	128093297	t	c	0.2065	0.0031	0.210331	0.0081512	8.05e-147	++	77.4	4.42904	1	0.03533
rs7841060	8	128096477	t	g	0.7921	0.0026	-0.209822	0.0081496	3.54e-146	--	77.9	4.51909	1	0.03352
rs67528759	8	128538824	a	g	0.1251	0	0.2983	0.0116	7.84e-146	+?	0	0	0	1
rs72550836	8	128525336	t	c	0.9595	0.0119	-0.437424	0.0170802	1.18e-144	--	87.4	7.9656	1	0.004767
rs11263763	17	36103565	a	g	0.5292	0	0.2033	0.008	1.83e-142	+?	0	0	0	1
rs368538194	8	128120421	c	g	0.035	0.005	0.432121	0.0170347	5.81e-142	++	46	1.85296	1	0.1734
rs7013278	8	128414892	t	c	0.359	0.0054	0.176989	0.0069776	6.11e-142	++	83.7	6.13464	1	0.01326
rs11997201	8	128415734	c	g	0.3591	0.0054	0.176969	0.0069771	6.28e-142	++	83.6	6.10823	1	0.01346
rs6982324	8	128119056	c	g	0.035	0.005	0.431843	0.0170347	8.8e-142	++	45.2	1.82371	1	0.1769
rs776143481	17	36099952	a	t	0.5238	0	0.2027	0.008	1.23e-141	+?	0	0	0	1
rs73348241	8	128112179	a	t	0.035	0.005	0.431492	0.0170346	1.48e-141	++	44.1	1.78798	1	0.1812
rs16901966	8	128110252	a	g	0.965	0.005	-0.431491	0.0170346	1.48e-141	--	44.1	1.78805	1	0.1812
rs1361556697	8	128541093	t	c	0.8799	0	-0.2937	0.0116	1.98e-141	-?	0	0	0	1
rs1551512	8	128124126	t	g	0.9648	0.0049	-0.431283	0.0170347	2.03e-141	--	43.4	1.76639	1	0.1838
rs73348243	8	128112193	a	t	0.035	0.005	0.431213	0.0170346	2.25e-141	++	43.2	1.75924	1	0.1847
rs10453084	8	128112779	a	g	0.035	0.005	0.431213	0.0170346	2.25e-141	++	43.2	1.75924	1	0.1847
rs16901970	8	128112715	t	g	0.965	0.005	-0.431073	0.0170346	2.77e-141	--	42.7	1.74496	1	0.1865
rs6470499	8	128123394	t	c	0.9648	0.0049	-0.430934	0.0170347	3.41e-141	--	42.2	1.73073	1	0.1883
rs7014346	8	128424792	a	g	0.357	0.0056	0.176509	0.0069793	4.07e-141	++	85.8	7.04184	1	0.007963
rs201885483	8	128285408	g	gataa	0.0134	0	1.17866	0.0466052	4.08e-141	?+	0	0	0	1
rs12678505	8	128128506	t	c	0.035	0.005	0.430652	0.0170347	5.19e-141	++	41.3	1.70314	1	0.1919
rs140266678	8	128119887	a	aag	0.9648	0.0049	-0.430587	0.0170347	5.7e-141	--	41	1.69494	1	0.193
rs7844219	8	128118815	a	g	0.9648	0.0049	-0.430518	0.0170347	6.32e-141	--	40.8	1.68793	1	0.1939
rs7837051	8	128121849	c	g	0.0347	0.0053	0.433435	0.0171506	6.44e-141	++	50.2	2.00658	1	0.1566
rs61265543	8	128112446	t	c	0.0352	0.0049	0.430446	0.0170346	7.03e-141	++	40.5	1.68142	1	0.1947
rs11651052	17	36102381	a	g	0.4695	0	-0.2021	0.008	8.26e-141	-?	0	0	0	1
rs16901979	8	128124916	a	c	0.0352	0.005	0.430216	0.0170298	8.26e-141	++	42.3	1.73271	1	0.1881
rs58717512	8	128107381	a	t	0.035	0.0051	0.431737	0.0170927	9.14e-141	++	45	1.81881	1	0.1775
rs7006076	8	128111238	a	g	0.035	0.005	0.431667	0.0170927	1.01e-140	++	44.8	1.81156	1	0.1783
rs6987640	8	128113028	a	t	0.965	0.005	-0.431773	0.0170986	1.08e-140	--	40.2	1.67293	1	0.1959
rs371764913	8	128120718	a	t	0.965	0.0051	-0.4316	0.0170928	1.12e-140	--	44.6	1.8038	1	0.1793
rs201401963	8	128120772	t	g	0.965	0.0051	-0.4316	0.0170928	1.12e-140	--	44.6	1.8038	1	0.1793
rs6999725	8	128115752	t	c	0.0347	0.0053	0.43302	0.0171506	1.19e-140	++	49	1.96115	1	0.1614
rs201821183	8	128120465	a	t	0.965	0.0051	-0.43153	0.0170928	1.24e-140	--	44.3	1.79657	1	0.1801
rs6988257	8	128111456	t	c	0.965	0.0051	-0.431389	0.0170927	1.53e-140	--	43.9	1.78267	1	0.1818
rs72154702	8	128127819	a	ac	0.9648	0.0049	-0.429885	0.0170347	1.62e-140	--	38.5	1.62665	1	0.2022
rs7824785	8	128114710	t	c	0.0354	0.0048	0.428369	0.0169749	1.64e-140	++	35.2	1.54335	1	0.2141
rs6470498	8	128115720	a	g	0.965	0.0051	-0.43132	0.0170927	1.69e-140	--	43.7	1.77549	1	0.1827
rs74305597	8	128113464	t	c	0.035	0.005	0.43132	0.0170927	1.69e-140	++	43.7	1.77549	1	0.1827
rs7010450	8	128108679	t	g	0.965	0.0051	-0.43125	0.0170927	1.88e-140	--	43.4	1.76832	1	0.1836
rs57435694	8	128108593	t	c	0.965	0.0051	-0.43125	0.0170927	1.88e-140	--	43.4	1.76832	1	0.1836
rs73350138	8	128126798	t	g	0.9648	0.0049	-0.429741	0.0170347	2.01e-140	--	38	1.61388	1	0.2039
rs7824451	8	128114461	c	g	0.965	0.005	-0.431172	0.0170918	2.03e-140	--	44	1.78621	1	0.1814
rs6983561	8	128106880	a	c	0.9648	0.005	-0.429709	0.0170341	2.06e-140	--	40	1.66665	1	0.1967
rs73348236	8	128111470	t	c	0.035	0.005	0.431181	0.0170927	2.08e-140	++	43.2	1.76117	1	0.1845
rs61622455	8	128108516	t	c	0.965	0.0051	-0.431181	0.0170927	2.08e-140	--	43.2	1.76117	1	0.1845
rs73348257	8	128115259	a	g	0.035	0.005	0.431181	0.0170927	2.08e-140	++	43.2	1.76117	1	0.1845
rs7001069	8	128110646	a	g	0.965	0.0051	-0.431181	0.0170927	2.08e-140	--	43.2	1.76117	1	0.1845
rs16901948	8	128107101	a	g	0.0351	0.005	0.429679	0.0170346	2.2e-140	++	37.7	1.60536	1	0.2051
rs16901953	8	128108229	t	c	0.965	0.0051	-0.431111	0.0170927	2.31e-140	--	43	1.75402	1	0.1854
rs16901950	8	128107243	a	g	0.035	0.0051	0.431111	0.0170927	2.31e-140	++	43	1.75402	1	0.1854
rs6989838	8	128129372	t	c	0.9648	0.0049	-0.429604	0.0170338	2.38e-140	--	38.3	1.62197	1	0.2028
rs16901969	8	128112097	a	c	0.965	0.005	-0.431042	0.0170927	2.55e-140	--	42.8	1.7469	1	0.1863
rs16901952	8	128107270	t	c	0.965	0.0051	-0.431042	0.0170927	2.55e-140	--	42.8	1.7469	1	0.1863
rs6987723	8	128112859	a	g	0.035	0.005	0.431042	0.0170927	2.55e-140	++	42.8	1.7469	1	0.1863
rs113924831	8	128108060	c	g	0.035	0.0051	0.431042	0.0170927	2.55e-140	++	42.8	1.7469	1	0.1863
rs73344342	8	128109356	a	g	0.035	0.0051	0.431042	0.0170927	2.55e-140	++	42.8	1.7469	1	0.1863
rs57462547	8	128117863	t	c	0.0352	0.0049	0.429541	0.0170347	2.69e-140	++	37.2	1.59124	1	0.2071
rs7830341	8	128109930	a	g	0.0351	0.005	0.42947	0.0170346	2.99e-140	++	36.9	1.58492	1	0.2081
rs59786353	8	128107682	a	c	0.965	0.0051	-0.430902	0.0170927	3.14e-140	--	42.3	1.73269	1	0.1881
rs7817677	8	128125504	a	g	0.9648	0.0049	-0.429385	0.0170336	3.26e-140	--	38.5	1.62604	1	0.2023
rs16901959	8	128109530	a	g	0.965	0.005	-0.430825	0.0170918	3.4e-140	--	42.9	1.75039	1	0.1858
rs7016830	8	128106235	a	g	0.9649	0.005	-0.429367	0.0170352	3.55e-140	--	36	1.56325	1	0.2112
rs7016828	8	128106232	a	t	0.9649	0.005	-0.429298	0.0170352	3.94e-140	--	35.8	1.55652	1	0.2122
rs60681470	8	128107192	a	g	0.0352	0.0049	0.429191	0.0170346	4.53e-140	++	35.8	1.55788	1	0.212
rs12682344	8	128106784	t	g	0.965	0.005	-0.430661	0.0170931	4.55e-140	--	41	1.69612	1	0.1928
rs16901984	8	128130961	t	c	0.965	0.005	-0.430567	0.0170931	5.21e-140	--	41	1.69467	1	0.193
rs7842760	8	128123470	a	g	0.0352	0.0049	0.428982	0.0170347	6.18e-140	++	35	1.53773	1	0.215
rs6983549	8	128420712	a	g	0.6427	0.0048	-0.175713	0.0069776	6.22e-140	--	86	7.16624	1	0.007429
rs10505483	8	128125195	t	c	0.0353	0.005	0.428765	0.0170345	8.46e-140	++	36	1.5636	1	0.2111
rs8064454	17	36101586	a	c	0.4705	0	-0.2013	0.008	1.03e-139	-?	0	0	0	1
rs921146	8	128475185	t	g	0.7639	0.0312	-0.198186	0.0078775	1.14e-139	--	95.9	24.1137	1	9.081e-07
rs1073997	8	128105187	a	c	0.9648	0.005	-0.427707	0.0170322	3.71e-139	--	38.3	1.62054	1	0.203
rs4341134	8	128121288	t	c	0.9644	0.0047	-0.426279	0.0169763	3.85e-139	--	22.2	1.28562	1	0.2569
rs566750306	8	128363429	a	ac	0.0183	0.0033	0.591682	0.0236103	1.35e-138	++	95.7	23.4683	1	1.27e-06
rs11651755	17	36099840	t	c	0.5186	0	0.2	0.008	6.11e-138	+?	0	0	0	1
rs56005245	8	128113426	t	c	0.1938	0.0015	0.207366	0.0083029	1.14e-137	++	92.4	13.089	1	0.000297
rs7826388	8	128109776	t	c	0.0354	0.0048	0.424937	0.0170346	2.39e-137	++	14.8	1.17425	1	0.2785
rs4646284	6	160581543	t	tg	0.7152	0.0134	-0.187674	0.0075342	5.85e-137	--	72.7	3.66309	1	0.05563
rs7005144	8	128107644	a	t	0.0355	0.0047	0.422814	0.0169758	6.27e-137	++	7.7	1.0833	1	0.298
rs146836668	8	128380384	a	g	0.0185	0.0035	0.57793	0.0232394	1.63e-136	++	95.7	23.0765	1	1.557e-06
rs182352457	8	127941793	a	g	0.0146	0	1.1408	0.0459858	7.41e-136	?+	0	0	0	1
rs75949840	8	128140484	c	g	0.0336	0.005	0.429937	0.0174347	2.88e-134	++	44.4	1.79983	1	0.1797
rs4515512	8	128532399	a	g	0.1683	0	0.415426	0.0168835	1.1e-133	?+	0	0	0	1
rs10505474	8	128417504	t	c	0.4188	0.008	0.168392	0.0068616	5.36e-133	++	12.3	1.14025	1	0.2856
rs10095770	8	128088570	c	g	0.1891	0.0094	0.206992	0.0084472	1.33e-132	++	35.1	1.54051	1	0.2145
rs4871022	8	128427720	t	c	0.583	0.0077	-0.16796	0.0068623	2.68e-132	--	34	1.51421	1	0.2185
rs755414831	8	128534115	a	acaaat	0.8731	0	-0.279	0.0114	2.82e-132	-?	0	0	0	1
rs10808557	8	128427306	t	c	0.5832	0.0079	-0.167643	0.0068621	8.15e-132	--	36.1	1.56433	1	0.211
rs4276648	8	128427372	t	c	0.4168	0.0079	0.167496	0.0068621	1.38e-131	++	37.4	1.59664	1	0.2064
rs61460400	8	128522584	g	ga	0.8605	0	-0.266	0.0109	1.56e-131	-?	0	0	0	1
rs7013328	8	128423911	a	g	0.5833	0.0079	-0.167424	0.0068621	1.78e-131	--	38	1.61357	1	0.204
rs7018371	8	128424899	t	c	0.5834	0.008	-0.167423	0.0068621	1.79e-131	--	38	1.61325	1	0.204
rs7837644	8	128423398	a	t	0.4167	0.008	0.167423	0.0068621	1.79e-131	++	38	1.61325	1	0.204
rs7837706	8	128423184	c	g	0.5833	0.008	-0.167422	0.0068623	1.82e-131	--	38	1.61287	1	0.2041
rs6981321	8	128513305	c	g	0.2978	0.0259	0.180023	0.0073811	2.2e-131	++	93.1	14.4768	1	0.0001419
rs871135	8	128426393	t	g	0.5833	0.0079	-0.16735	0.0068621	2.32e-131	--	38.6	1.62961	1	0.2018
rs10956367	8	128423544	t	c	0.4167	0.0079	0.16735	0.0068621	2.32e-131	++	38.6	1.62961	1	0.2018
rs10808556	8	128413147	t	c	0.5804	0.0077	-0.167332	0.0068615	2.35e-131	--	17.6	1.21423	1	0.2705
rs1172178984	8	128522063	t	c	0.1395	0	0.2658	0.0109	2.45e-131	+?	0	0	0	1
rs7837328	8	128423127	a	g	0.4167	0.0081	0.167357	0.0068635	2.54e-131	++	36.5	1.5742	1	0.2096
rs10956369	8	128423817	a	t	0.5833	0.0079	-0.167308	0.0068624	2.75e-131	--	40	1.66623	1	0.1968
rs7018368	8	128424933	a	g	0.4168	0.0079	0.167276	0.0068621	3.02e-131	++	39.2	1.64606	1	0.1995
rs7018367	8	128424883	t	c	0.5833	0.0079	-0.167276	0.0068621	3.02e-131	--	39.2	1.64606	1	0.1995
rs7837626	8	128423341	a	g	0.4167	0.0079	0.167276	0.0068621	3.02e-131	++	39.2	1.64606	1	0.1995
rs10956370	8	128424728	a	c	0.5832	0.0079	-0.167276	0.0068621	3.02e-131	--	39.2	1.64589	1	0.1995
rs11998706	8	128422098	c	g	0.4167	0.008	0.167201	0.0068621	3.94e-131	++	39.8	1.6619	1	0.1973
rs4430796	17	36098040	a	g	0.5253	0	0.1973	0.0081	4.77e-131	+?	0	0	0	1
rs12678562	8	128422488	a	g	0.4167	0.008	0.167128	0.0068621	5.11e-131	++	40.4	1.67885	1	0.1951
rs3847137	8	128414498	t	c	0.5785	0.0066	-0.167004	0.0068618	7.72e-131	--	32.4	1.48022	1	0.2237
rs11263761	17	36097775	a	g	0.5221	0	0.1971	0.0081	8.7e-131	+?	0	0	0	1
rs11778075	8	128421128	t	g	0.5829	0.0082	-0.166944	0.0068618	9.57e-131	--	40.8	1.68859	1	0.1938
rs10956366	8	128423491	a	g	0.5836	0.0081	-0.166908	0.0068621	1.12e-130	--	42.2	1.72953	1	0.1885
rs11784983	8	128421348	a	g	0.4171	0.0082	0.166865	0.0068618	1.26e-130	++	41.2	1.7017	1	0.1921
rs2060776	8	128420117	t	g	0.5824	0.008	-0.166527	0.0068619	4.23e-130	--	38.1	1.61549	1	0.2037
rs4871788	8	128421785	a	g	0.5833	0.0079	-0.166465	0.0068619	5.26e-130	--	47.3	1.89735	1	0.1684
rs10956368	8	128423650	t	c	0.4064	0.0094	0.166162	0.0068667	2.32e-129	++	58.4	2.40219	1	0.1212
rs12795301	11	68992285	a	c	0.147	0.0233	0.226712	0.0094006	1.67e-128	++	50	1.99845	1	0.1575
rs12547874	8	128525632	a	t	0.3047	0.024	0.176297	0.0073161	2.67e-128	++	94.6	18.4122	1	1.779e-05
rs12275055	11	68981359	a	g	0.8527	0.0233	-0.226479	0.0093999	2.9e-128	--	47.8	1.91753	1	0.1661
rs71046512	11	68990715	t	tg	0.1473	0.0234	0.226393	0.0094006	3.79e-128	++	51.2	2.04756	1	0.1525
rs11228580	11	69002342	t	c	0.8524	0.0231	-0.225504	0.0093917	2.14e-127	--	44.5	1.8025	1	0.1794
rs7130881	11	68995958	a	g	0.8527	0.0234	-0.225671	0.0094005	2.4e-127	--	53.6	2.15747	1	0.1419
rs12417087	11	69003979	a	t	0.8524	0.0231	-0.225443	0.0093915	2.46e-127	--	45.2	1.82497	1	0.1767
rs11351679	11	68985480	g	gt	0.4902	0.0127	0.162653	0.0067991	1.78e-126	++	6.2	1.06596	1	0.3019
rs7929962	11	68985583	t	c	0.4902	0.0128	0.162562	0.0067991	2.44e-126	++	6.6	1.07052	1	0.3008
rs9787877	11	68996509	t	c	0.51	0.0129	-0.162552	0.0067991	2.54e-126	--	6.1	1.06518	1	0.302
rs10896448	11	68991749	c	g	0.4902	0.013	0.162398	0.0067991	4.37e-126	++	8.2	1.08898	1	0.2967
rs10896449	11	68994667	a	g	0.5099	0.0129	-0.162361	0.0067992	5.03e-126	--	10.9	1.12207	1	0.2895
rs148573085	17	46514274	a	t	0.9894	0	-1.24173	0.0520006	5.04e-126	?-	0	0	0	1
rs6591374	11	68993832	a	g	0.51	0.0129	-0.162328	0.0067991	5.58e-126	--	9.5	1.10477	1	0.2932
rs7121816	11	68990295	t	g	0.51	0.0129	-0.162327	0.0067991	5.62e-126	--	9.4	1.10408	1	0.2934
rs181416311	17	46533726	t	g	0.0106	0	1.2415	0.0520083	6.1e-126	?+	0	0	0	1
rs386729821	8	128479963	t	c	0.1425	0	0.26	0.0109	9.38e-126	+?	0	0	0	1
rs183520446	17	46374169	a	g	0.0106	0	1.23919	0.0519919	1.47e-125	?+	0	0	0	1
rs12362678	11	68996170	c	g	0.5021	0.0119	-0.161931	0.0067969	1.88e-125	--	30.5	1.43936	1	0.2302
rs12278923	11	68983561	a	c	0.5022	0.0116	-0.161893	0.0067971	2.17e-125	--	32.3	1.47717	1	0.2242
rs9667638	11	69004339	a	t	0.4904	0.0125	0.161877	0.0067982	2.52e-125	++	11.5	1.12976	1	0.2878
rs12793759	11	68974555	a	g	0.1383	0.0222	0.228671	0.0096035	2.56e-125	++	68.2	3.14734	1	0.07605
rs7939250	11	69002950	a	g	0.4904	0.0125	0.161873	0.0067982	2.56e-125	++	11.3	1.12768	1	0.2883
rs7939803	11	68983700	t	c	0.5018	0.0118	-0.161816	0.0067971	2.85e-125	--	32.9	1.4907	1	0.2221
rs7947353	11	69004983	a	g	0.4909	0.0127	0.161821	0.0067984	3.13e-125	++	17.2	1.2073	1	0.2719
rs7109672	11	68991110	a	g	0.5024	0.0117	-0.161706	0.0067969	4.13e-125	--	32.6	1.48459	1	0.2231
rs4620729	11	68980335	a	c	0.4897	0.0124	0.161732	0.0068004	5.02e-125	++	9.7	1.10796	1	0.2925
rs11228583	11	69009114	t	g	0.4905	0.0126	0.16166	0.0067983	5.44e-125	++	14.8	1.17396	1	0.2786
rs7106762	11	69003706	t	c	0.5089	0.0128	-0.16167	0.006799	5.54e-125	--	11.3	1.12685	1	0.2884
rs7122190	11	68993788	t	c	0.4972	0.0115	0.161561	0.0067969	6.87e-125	++	34.1	1.51796	1	0.2179
rs10792033	11	68989198	a	g	0.4978	0.0118	0.161559	0.0067969	6.93e-125	++	34.1	1.51681	1	0.2181
rs4451736	11	68982703	a	g	0.5017	0.0117	-0.161525	0.0067975	8.18e-125	--	33.2	1.49721	1	0.2211
rs10896450	11	69008114	a	g	0.5089	0.013	-0.161361	0.0067983	1.55e-124	--	18.6	1.22897	1	0.2676
rs6998061	8	128428638	a	g	0.4124	0.0026	-0.164978	0.0069589	3.01e-124	--	0	0.134802	1	0.7135
rs4644650	11	68998118	t	c	0.5017	0.0121	-0.161032	0.0067967	4.3e-124	--	38.4	1.62444	1	0.2025
rs4569015	11	68998405	t	c	0.5018	0.0121	-0.160979	0.0067968	5.2e-124	--	39.5	1.6541	1	0.1984
rs7842552	8	128431694	a	g	0.7049	0.0163	-0.173593	0.0073342	7.54e-124	--	93.8	16.2314	1	5.606e-05
rs12293259	11	69010238	t	g	0.5093	0.0128	-0.16208	0.0068631	2.63e-123	--	11.9	1.13516	1	0.2867
rs138263737	17	46915735	t	c	0.0111	0	1.22412	0.0518349	2.66e-123	?+	0	0	0	1
rs12799883	11	69010651	t	g	0.5088	0.0131	-0.162087	0.0068636	2.68e-123	--	12.2	1.13959	1	0.2857
rs538895554	17	46269269	t	c	0.0107	0	1.22632	0.0521423	2.62e-122	?+	0	0	0	1
rs531249070	17	46245500	a	g	0.0107	0	1.22482	0.0521387	4.97e-122	?+	0	0	0	1
rs539336725	17	46201911	t	c	0.0108	0	1.21679	0.0518407	7.94e-122	?+	0	0	0	1
rs566094658	17	46233101	c	g	0.9892	0	-1.2165	0.0518362	8.63e-122	?-	0	0	0	1
rs12270641	11	69012244	a	t	0.4919	0.0135	0.160975	0.0068647	1.33e-121	++	29	1.40857	1	0.2353
rs2005705	17	36096300	a	g	0.4442	0	-0.1889	0.0081	2.72e-120	-?	0	0	0	1
rs9643226	8	128494481	c	g	0.1768	0	0.386624	0.0165856	3.44e-120	?+	0	0	0	1
rs150869774	8	128444775	t	c	0.98	0.0029	-0.524842	0.0225525	8.5e-120	--	96.9	32.0788	1	1.48e-08
rs6985504	8	128496776	a	g	0.2688	0.0224	0.174966	0.0075479	7.15e-119	++	97.3	36.6928	1	1.383e-09
rs386729820	8	128478160	t	g	0.0771	0	0.3268	0.0141	7.71e-119	+?	0	0	0	1
rs7930375	11	68972657	c	g	0.5119	0.013	-0.158919	0.0068669	1.72e-118	--	38.2	1.61688	1	0.2035
rs12549761	8	128540776	c	g	0.8767	0.0013	0.253652	0.0109674	2.43e-118	++	87.3	7.85886	1	0.005057
rs9901746	17	36103149	a	g	0.4258	0	0.1863	0.0081	4.66e-117	+?	0	0	0	1
rs757209	17	36102833	a	g	0.4259	0	0.1862	0.0081	6.19e-117	+?	0	0	0	1
rs12545648	8	128534755	t	c	0.8307	0	-0.386728	0.0168727	2.91e-116	?-	0	0	0	1
rs4871803	8	128488382	a	c	0.2644	0.0355	0.174794	0.0076323	4.45e-116	++	95.5	22.2847	1	2.351e-06
rs1165964643	17	36102035	c	g	0.4283	0	0.1855	0.0081	4.52e-116	+?	0	0	0	1
rs12453443	17	36104121	c	g	0.5755	0	-0.1854	0.0081	5.99e-116	-?	0	0	0	1
rs11263762	17	36101926	a	g	0.4282	0	0.1852	0.0081	1.06e-115	+?	0	0	0	1
rs4871799	8	128482642	a	g	0.7306	0.0386	-0.172636	0.0075576	1.73e-115	--	96	25.2059	1	5.152e-07
rs4871790	8	128441535	a	c	0.524	0.0034	0.156703	0.0068614	1.91e-115	++	0	0.947038	1	0.3305
rs9643225	8	128494391	t	c	0.2702	0.025	0.172097	0.007537	2.12e-115	++	96.7	30.1671	1	3.964e-08
rs78311688	8	128479976	t	c	0.9839	0	-0.999998	0.0438819	5.98e-115	?-	0	0	0	1
rs7005132	8	128535635	a	g	0.1716	0	0.38253	0.0168062	1.11e-114	?+	0	0	0	1
rs8180905	8	128538824	a	g	0.1711	0	0.382193	0.0168182	2.54e-114	?+	0	0	0	1
rs7831028	8	128492029	c	g	0.2735	0.0266	0.170927	0.0075288	4.16e-114	++	96.1	25.8403	1	3.709e-07
rs4871800	8	128482715	t	c	0.7313	0.038	-0.171091	0.0075599	2.13e-113	--	95.8	23.734	1	1.106e-06
rs4242386	8	128541093	t	c	0.8213	0	-0.375224	0.0166175	6.81e-113	?-	0	0	0	1
rs12601991	17	36101633	t	g	0.4254	0	0.1824	0.0081	2.73e-112	+?	0	0	0	1
rs72712344	8	128342626	t	g	0.1715	0.0331	0.201519	0.0089931	3.27e-111	++	76.9	4.33168	1	0.03741
rs60163266	8	128323157	a	g	0.167	0.0364	0.201484	0.0090449	6.33e-110	++	76.4	4.23553	1	0.03959
rs10956372	8	128470256	a	t	0.65	0.0311	-0.158996	0.0071437	9.66e-110	--	96.1	25.6854	1	4.019e-07
rs368727510	8	128324539	a	g	0.1674	0.0361	0.201013	0.009045	2.03e-109	++	77.6	4.45508	1	0.0348
rs58104177	8	128335536	a	g	0.1691	0.0352	0.19959	0.0089868	2.79e-109	++	78.1	4.57242	1	0.03249
rs2843547	10	51519358	a	g	0.4363	0	0.1753	0.0079	4.3e-109	+?	0	0	0	1
rs144898130	8	128324075	t	c	0.1668	0.037	0.201705	0.0090992	7.1e-109	++	76.1	4.1851	1	0.04078
rs72712335	8	128338258	a	g	0.1686	0.0355	0.199215	0.0089872	7.23e-109	++	78.9	4.73127	1	0.02962
rs56736364	8	128323724	t	c	0.1674	0.0362	0.200466	0.0090441	7.41e-109	++	78.4	4.62525	1	0.0315
rs72712339	8	128340554	t	c	0.1683	0.0352	0.199236	0.0089912	8.54e-109	++	79	4.75452	1	0.02922
rs72712334	8	128336664	a	c	0.8313	0.0355	-0.199139	0.0089871	8.66e-109	--	78.9	4.74746	1	0.02934
rs72712332	8	128336053	c	g	0.8314	0.0354	-0.199129	0.0089879	9.28e-109	--	79.2	4.81326	1	0.02824
rs139988765	8	128324071	t	c	0.8318	0.0362	-0.200283	0.009041	9.8e-109	--	78.1	4.56196	1	0.03269
rs7911198	10	51537475	a	g	0.5627	0	-0.175	0.0079	1e-108	-?	0	0	0	1
rs1564941314	10	51540906	a	c	0.563	0	-0.175	0.0079	1e-108	-?	0	0	0	1
rs1564947378	10	51520203	a	c	0.567	0	-0.175	0.0079	1e-108	-?	0	0	0	1
rs55717424	8	128335079	a	g	0.8313	0.0354	-0.199046	0.0089868	1.07e-108	--	79	4.75204	1	0.02926
rs11006462	10	51545813	a	g	0.5563	0	-0.1749	0.0079	1.32e-108	-?	0	0	0	1
rs151204419	8	128323951	a	ag	0.1688	0.0354	0.198907	0.0089853	1.39e-108	++	80	5.00679	1	0.02525
rs201469546	8	128324001	t	c	0.8312	0.0354	-0.198837	0.0089853	1.66e-108	--	80.1	5.02885	1	0.02493
rs7077830	10	51522276	c	g	0.5673	0	-0.1748	0.0079	1.75e-108	-?	0	0	0	1
rs443053	8	128335796	t	g	0.3611	0.0116	-0.158234	0.0071569	2.58e-108	--	94.1	16.8096	1	4.132e-05
rs2843554	10	51523861	t	g	0.5657	0	-0.1746	0.0079	3.07e-108	-?	0	0	0	1
rs7081532	10	51526093	a	g	0.4343	0	0.1745	0.0079	4.07e-108	+?	0	0	0	1
rs2337711	10	51504604	t	c	0.4354	0	0.1745	0.0079	4.07e-108	+?	0	0	0	1
rs60822390	10	51544680	caaat	c	0.4438	0	0.1745	0.0079	4.07e-108	+?	0	0	0	1
rs7098889	10	51544475	t	c	0.5564	0	-0.1745	0.0079	4.07e-108	-?	0	0	0	1
rs7477953	10	51544692	a	g	0.5564	0	-0.1745	0.0079	4.07e-108	-?	0	0	0	1
rs10825587	10	51509258	t	c	0.4351	0	0.1744	0.0079	5.38e-108	+?	0	0	0	1
rs77635060	8	128330555	c	g	0.169	0.0354	0.199582	0.0090435	6.27e-108	++	78.7	4.70404	1	0.03009
rs10763256	10	51509408	a	c	0.4363	0	0.1743	0.0079	7.12e-108	+?	0	0	0	1
rs61847060	10	51510203	a	g	0.4352	0	0.1743	0.0079	7.12e-108	+?	0	0	0	1
rs7832541	8	128325183	t	c	0.6423	0.0151	0.158218	0.0071734	8.32e-108	++	95.3	21.4079	1	3.712e-06
rs7088225	10	51522120	t	c	0.5662	0	-0.1742	0.0079	9.42e-108	-?	0	0	0	1
rs11005089	10	51510813	a	c	0.4365	0	0.1742	0.0079	9.42e-108	+?	0	0	0	1
rs2843551	10	51521945	a	c	0.5653	0	-0.1742	0.0079	9.42e-108	-?	0	0	0	1
rs138061577	10	51501963	a	agtt	0.4354	0	0.1742	0.0079	9.42e-108	+?	0	0	0	1
rs10825652	10	51510761	a	g	0.4364	0	0.1742	0.0079	9.42e-108	+?	0	0	0	1
rs2843550	10	51521452	t	c	0.5653	0	-0.1742	0.0079	9.42e-108	-?	0	0	0	1
rs72712310	8	128333565	a	g	0.169	0.0356	0.199288	0.0090425	1.22e-107	++	78.8	4.70602	1	0.03006
rs72712308	8	128333220	t	c	0.831	0.0356	-0.199289	0.0090426	1.22e-107	--	78.8	4.7068	1	0.03004
rs67289834	10	51501304	t	c	0.4358	0	0.1741	0.0079	1.25e-107	+?	0	0	0	1
rs3123078	10	51524971	t	c	0.5654	0	-0.1741	0.0079	1.25e-107	-?	0	0	0	1
rs4935162	10	51525699	c	g	0.5653	0	-0.1741	0.0079	1.25e-107	-?	0	0	0	1
rs11006274	10	51540291	t	c	0.436	0	0.1741	0.0079	1.25e-107	+?	0	0	0	1
rs57442251	10	51502612	a	c	0.4356	0	0.1741	0.0079	1.25e-107	+?	0	0	0	1
rs2843549	10	51521247	a	c	0.5653	0	-0.1741	0.0079	1.25e-107	-?	0	0	0	1
rs4486572	10	51531805	a	g	0.4343	0	0.1741	0.0079	1.25e-107	+?	0	0	0	1
rs7915602	10	51528656	a	g	0.4346	0	0.1741	0.0079	1.25e-107	+?	0	0	0	1
rs16902102	8	128340221	a	c	0.1686	0.0354	0.199325	0.0090469	1.41e-107	++	78.9	4.7414	1	0.02945
rs145922598	17	46810586	t	c	0.0134	0	1.05751	0.0480064	1.54e-107	?+	0	0	0	1
rs16902104	8	128340908	t	c	0.1686	0.0354	0.199276	0.0090472	1.61e-107	++	79.1	4.77779	1	0.02883
rs1554935151	10	51505000	ca	c	0.4352	0	0.174	0.0079	1.65e-107	+?	0	0	0	1
rs2611513	10	51515457	t	c	0.5633	0	-0.174	0.0079	1.65e-107	-?	0	0	0	1
rs7896437	10	51529593	a	c	0.4347	0	0.174	0.0079	1.65e-107	+?	0	0	0	1
rs7071471	10	51503335	t	c	0.4361	0	0.174	0.0079	1.65e-107	+?	0	0	0	1
rs2611489	10	51524889	a	g	0.5653	0	-0.174	0.0079	1.65e-107	-?	0	0	0	1
rs16902101	8	128340124	c	g	0.8314	0.0353	-0.199252	0.0090469	1.68e-107	--	79	4.76041	1	0.02912
rs10099413	8	128522063	t	c	0.2071	0	0.347224	0.0157845	3.02e-107	?+	0	0	0	1
rs35463793	8	128524216	a	ac	0.7929	0	-0.347225	0.0157861	3.17e-107	?-	0	0	0	1
rs34255287	11	69013135	a	g	0.1523	0.0215	0.205348	0.0093376	3.46e-107	++	27.7	1.38362	1	0.2395
rs10763538	10	51535857	a	g	0.4361	0	0.1737	0.0079	3.81e-107	+?	0	0	0	1
rs618477	8	128327641	c	g	0.6439	0.0142	0.157713	0.0071734	3.95e-107	++	94.7	18.8196	1	1.437e-05
rs35094615	10	51518083	t	ta	0.56	0	-0.1736	0.0079	5.03e-107	-?	0	0	0	1
rs421094	8	128323874	a	g	0.355	0.0145	-0.157548	0.0071758	7.69e-107	--	95	20.2017	1	6.969e-06
rs4581397	10	51532367	a	g	0.4358	0	0.1734	0.0079	8.78e-107	+?	0	0	0	1
rs187359375	8	128120151	t	c	0.0317	0	0.4477	0.0204	9.44e-107	+?	0	0	0	1
rs445114	8	128323181	t	c	0.6415	0.015	0.157385	0.0071717	9.6e-107	++	95.3	21.0831	1	4.398e-06
rs186307710	8	128327210	c	g	0.83	0.0351	-0.197098	0.008983	1.05e-106	--	80.5	5.14112	1	0.02337
rs10763567	10	51538169	a	c	0.4355	0	0.1733	0.0079	1.16e-106	+?	0	0	0	1
rs10763536	10	51535801	a	g	0.5637	0	-0.1733	0.0079	1.16e-106	-?	0	0	0	1
rs1554930238	10	51544143	t	g	0.4442	0	0.1732	0.0079	1.53e-106	+?	0	0	0	1
rs16902094	8	128320346	a	g	0.8309	0.0354	-0.196842	0.0089836	2.03e-106	--	80.7	5.1744	1	0.02292
rs2843546	10	51518688	a	c	0.4429	0	0.1727	0.0079	6.14e-106	+?	0	0	0	1
rs2611508	10	51518047	a	t	0.562	0	-0.1726	0.0079	8.1e-106	-?	0	0	0	1
rs2611504	10	51518910	a	g	0.5573	0	-0.1726	0.0079	8.1e-106	-?	0	0	0	1
rs2249986	10	51521684	t	g	0.4427	0	0.1726	0.0079	8.1e-106	+?	0	0	0	1
rs59294648	8	128112229	t	taag	0.9681	0	-0.4456	0.0204	9.03e-106	-?	0	0	0	1
rs2926494	10	51517356	t	c	0.439	0	0.1725	0.0079	1.07e-105	+?	0	0	0	1
rs4315013	10	51540860	a	g	0.5554	0	-0.1725	0.0079	1.07e-105	-?	0	0	0	1
rs4630243	10	51540867	t	c	0.4446	0	0.1725	0.0079	1.07e-105	+?	0	0	0	1
rs2843555	10	51524274	t	c	0.5574	0	-0.1725	0.0079	1.07e-105	-?	0	0	0	1
rs1170112161	10	51523213	a	t	0.4426	0	0.1725	0.0079	1.07e-105	+?	0	0	0	1
rs1554646149	8	128111717	a	g	0.9681	0	-0.4453	0.0204	1.25e-105	-?	0	0	0	1
rs34425474	8	128120234	t	c	0.9681	0	-0.4453	0.0204	1.25e-105	-?	0	0	0	1
rs620861	8	128335673	a	g	0.362	0.0121	-0.156217	0.0071577	1.34e-105	--	94.3	17.5764	1	2.76e-05
rs148913765	8	128123830	ca	c	0.0319	0	0.4452	0.0204	1.39e-105	+?	0	0	0	1
rs2611486	10	51519516	a	g	0.5571	0	-0.1724	0.0079	1.41e-105	-?	0	0	0	1
rs10826127	10	51530757	a	g	0.5571	0	-0.1722	0.0079	2.45e-105	-?	0	0	0	1
rs1393628408	8	128110277	a	g	0.9682	0	-0.4445	0.0204	2.94e-105	-?	0	0	0	1
rs144014777	8	128130582	t	tacaaaacacttcataacaaaaca	0.9683	0	-0.4466	0.0205	3.19e-105	-?	0	0	0	1
rs16902095	8	128321684	t	g	0.1711	0.0343	0.19561	0.0089822	3.79e-105	++	82.8	5.83021	1	0.01575
rs879503849	8	128108725	t	c	0.0316	0	0.4463	0.0205	4.4e-105	+?	0	0	0	1
rs76906564	8	128129985	g	gaatc	0.9681	0	-0.4441	0.0204	4.5e-105	-?	0	0	0	1
rs201507824	10	51539745	a	ac	0.5557	0	-0.1719	0.0079	5.62e-105	-?	0	0	0	1
rs1229355086	10	51518906	t	g	0.4412	0	0.1719	0.0079	5.62e-105	+?	0	0	0	1
rs138853148	8	128130487	a	g	0.968	0	-0.4438	0.0204	6.21e-105	-?	0	0	0	1
rs1554646122	8	128111342	a	g	0.9686	0	-0.4481	0.0206	6.55e-105	-?	0	0	0	1
rs386729791	8	128111343	a	g	0.0314	0	0.4481	0.0206	6.55e-105	+?	0	0	0	1
rs140249156	8	128108409	t	g	0.9684	0	-0.4459	0.0205	6.73e-105	-?	0	0	0	1
rs1276686652	8	128107153	a	c	0.9682	0	-0.4415	0.0203	7.1e-105	-?	0	0	0	1
rs1162280431	10	51535992	t	c	0.5549	0	-0.1718	0.0079	7.4e-105	-?	0	0	0	1
rs10763546	10	51536399	c	g	0.4444	0	0.1718	0.0079	7.4e-105	+?	0	0	0	1
rs386743606	10	51537431	t	c	0.5557	0	-0.1718	0.0079	7.4e-105	-?	0	0	0	1
rs4131357	10	51537292	a	c	0.5557	0	-0.1718	0.0079	7.4e-105	-?	0	0	0	1
rs11006223	10	51538915	t	g	0.5557	0	-0.1718	0.0079	7.4e-105	-?	0	0	0	1
rs11006207	10	51538176	t	c	0.4444	0	0.1717	0.0079	9.75e-105	+?	0	0	0	1
rs10763588	10	51539762	t	g	0.5555	0	-0.1717	0.0079	9.75e-105	-?	0	0	0	1
rs145560166	8	128107647	a	at	0.9684	0	-0.4455	0.0205	1.03e-104	-?	0	0	0	1
rs2611506	10	51518787	t	c	0.5584	0	-0.1716	0.0079	1.28e-104	-?	0	0	0	1
rs2611507	10	51518673	t	c	0.4419	0	0.1716	0.0079	1.28e-104	+?	0	0	0	1
rs57263518	10	51519154	a	g	0.4416	0	0.1716	0.0079	1.28e-104	+?	0	0	0	1
rs10763539	10	51535931	t	c	0.4445	0	0.1716	0.0079	1.28e-104	+?	0	0	0	1
rs7896156	10	51529379	a	g	0.4416	0	0.1715	0.0079	1.69e-104	+?	0	0	0	1
rs4554834	10	51530146	a	c	0.4417	0	0.1714	0.0079	2.23e-104	+?	0	0	0	1
rs1554931924	10	51530505	a	g	0.5583	0	-0.1714	0.0079	2.23e-104	-?	0	0	0	1
rs9787697	10	51533376	t	c	0.5554	0	-0.1714	0.0079	2.23e-104	-?	0	0	0	1
rs2611509	10	51516252	a	g	0.5546	0	-0.1714	0.0079	2.23e-104	-?	0	0	0	1
rs9911515	17	69115358	a	g	0.4857	0.0091	0.147358	0.0067946	2.69e-104	++	92.2	12.8401	1	0.0003393
rs28416634	10	51539271	a	g	0.5546	0	-0.1713	0.0079	2.93e-104	-?	0	0	0	1
rs10763534	10	51534920	t	c	0.5552	0	-0.1713	0.0079	2.93e-104	-?	0	0	0	1
rs6481329	10	51529746	a	g	0.5583	0	-0.1713	0.0079	2.93e-104	-?	0	0	0	1
rs78865546	10	51539259	a	c	0.5546	0	-0.1713	0.0079	2.93e-104	-?	0	0	0	1
rs4630241	10	51532751	a	g	0.5554	0	-0.1712	0.0079	3.86e-104	-?	0	0	0	1
rs8072254	17	69107816	a	g	0.4855	0.0091	0.147151	0.0067967	6.04e-104	++	91.9	12.3466	1	0.0004418
rs6501436	17	69119290	a	g	0.5144	0.009	-0.14714	0.0067975	6.59e-104	--	92.2	12.9029	1	0.0003281
rs11593361	10	51539156	a	g	0.4437	0	0.1709	0.0079	8.8e-104	+?	0	0	0	1
rs984434	17	69108127	t	c	0.4855	0.0091	0.146955	0.0067963	1.09e-103	++	92	12.5095	1	0.0004049
rs9889335	17	69115146	t	g	0.4858	0.009	0.146916	0.0067949	1.13e-103	++	92.2	12.7408	1	0.0003578
rs1554931701	10	51532621	a	g	0.5551	0	-0.1708	0.0079	1.16e-103	-?	0	0	0	1
rs9908087	17	69106937	t	g	0.4857	0.009	0.14692	0.0067969	1.27e-103	++	92	12.5781	1	0.0003903
rs9901566	17	69107018	c	g	0.4857	0.009	0.146911	0.0067968	1.31e-103	++	92.1	12.5926	1	0.0003873
rs8071558	17	69107673	c	g	0.4856	0.0091	0.146902	0.0067965	1.31e-103	++	92.1	12.605	1	0.0003847
rs8068266	17	69116935	a	g	0.4811	0.0114	0.146879	0.0067956	1.33e-103	++	92.7	13.7186	1	0.0002123
rs4463804	10	51537653	t	c	0.4429	0	0.1707	0.0079	1.52e-103	+?	0	0	0	1
rs17765344	17	69106874	a	g	0.4857	0.0091	0.146852	0.0067971	1.61e-103	++	92	12.5243	1	0.0004017
rs8072735	17	69117214	t	c	0.4811	0.0114	0.146802	0.0067956	1.7e-103	++	92.7	13.6749	1	0.0002173
rs10763576	10	51538813	a	t	0.4429	0	0.1706	0.0079	2e-103	+?	0	0	0	1
rs991429	17	69109773	a	g	0.5139	0.0088	-0.146577	0.0067957	3.51e-103	--	92	12.4656	1	0.0004145
rs4793529	17	69118636	t	c	0.4815	0.0111	0.146584	0.0067961	3.52e-103	++	92.6	13.5303	1	0.0002347
rs1859963	17	69113107	t	c	0.4814	0.0111	0.14657	0.0067956	3.56e-103	++	92.5	13.3692	1	0.0002558
rs35931666	10	51520488	t	taa	0.457	0	0.1747	0.0081	3.6e-103	+?	0	0	0	1
rs1859962	17	69108753	t	g	0.5134	0.009	-0.146535	0.0067966	4.25e-103	--	91.8	12.1985	1	0.0004783
rs17765332	17	69106742	t	c	0.4813	0.0113	0.146422	0.0067976	6.52e-103	++	92.4	13.1155	1	0.0002929
rs10505476	8	128408116	t	c	0.2791	0.0232	0.160862	0.0074681	6.58e-103	++	88.2	8.48792	1	0.003575
rs10826227	10	51539256	t	c	0.444	0	0.1701	0.0079	7.87e-103	+?	0	0	0	1
rs366991	8	128334245	a	g	0.6531	0.0205	0.155102	0.0072046	8.45e-103	++	91.6	11.8756	1	0.0005687
rs2843556	10	51516299	t	g	0.5554	0	-0.1722	0.008	9.08e-103	-?	0	0	0	1
rs375080041	10	51547002	ca	c	0.41	0	0.1721	0.008	1.19e-102	+?	0	0	0	1
rs6481462	10	51545028	a	g	0.591	0	-0.1721	0.008	1.19e-102	-?	0	0	0	1
rs4304716	10	51544587	a	g	0.4089	0	0.1721	0.008	1.19e-102	+?	0	0	0	1
rs11006489	10	51546336	a	g	0.4088	0	0.1719	0.008	2.04e-102	+?	0	0	0	1
rs1264065414	10	51547371	c	g	0.4093	0	0.1717	0.008	3.49e-102	+?	0	0	0	1
rs5013678	8	128103979	t	c	0.7937	0.0148	0.187122	0.0087411	1.15e-101	++	73.4	3.76276	1	0.05241
rs11311576	8	128423009	t	ta	0.4674	0	-0.1776	0.0083	1.41e-101	-?	0	0	0	1
rs1563681611	8	128420376	t	tatatatatatgg	0.5577	0	-0.1711	0.008	1.75e-101	-?	0	0	0	1
rs4631830	10	51543344	t	c	0.5904	0	-0.171	0.008	2.28e-101	-?	0	0	0	1
rs11658063	17	36103872	c	g	0.3929	0	-0.1774	0.0083	2.36e-101	-?	0	0	0	1
rs782409738	10	51520177	g	gt	0.5652	0	-0.173	0.0081	3.28e-101	-?	0	0	0	1
rs11994004	8	128324421	a	c	0.6584	0.0091	0.154589	0.0072474	5.95e-101	++	95.2	20.6289	1	5.575e-06
rs11657964	17	36100767	a	g	0.3939	0	-0.1746	0.0082	1.33e-100	-?	0	0	0	1
rs7501939	17	36101156	t	c	0.3938	0	-0.1745	0.0082	1.72e-100	-?	0	0	0	1
rs11228565	11	68978580	a	g	0.1969	0.0129	0.177812	0.0083612	2.33e-100	++	0	0.0020149	1	0.9642
rs7825928	8	128470608	a	c	0.4055	0.0365	0.148829	0.007004	3.35e-100	++	96.2	26.4454	1	2.711e-07
rs144351034	8	128534120	t	ta	0.1985	0	0.340661	0.0160347	3.65e-100	?+	0	0	0	1
rs879461489	8	128534106	a	aacaaaatg	0.8014	0	-0.340253	0.0160335	6.06e-100	?-	0	0	0	1
rs12418968	11	68977135	t	c	0.1971	0.0131	0.177423	0.0083611	6.22e-100	++	0	0.0046974	1	0.9454
rs4506170	8	128323891	t	c	0.8225	0.0353	-0.187392	0.0088366	8.35e-100	--	82.4	5.69008	1	0.01706
rs12281017	11	68977501	a	g	0.1975	0.0132	0.177292	0.0083605	8.42e-100	++	0	0.0108865	1	0.9169
rs7117034	11	68975142	t	c	0.1971	0.0131	0.177275	0.0083611	9.07e-100	++	0	0.0063108	1	0.9367
rs192955651	8	128324718	a	c	0.8237	0.036	-0.188564	0.0088954	9.95e-100	--	81	5.27304	1	0.02166
rs10956359	8	128342154	t	c	0.7161	0.0107	0.163102	0.0076956	1.08e-99	++	91.9	12.3352	1	0.0004445
rs378854	8	128323819	t	c	0.3407	0.0232	-0.154491	0.0072911	1.21e-99	--	93.4	15.2526	1	9.405e-05
rs11228562	11	68976171	t	g	0.1977	0.0134	0.17712	0.0083611	1.34e-99	++	0	0.0079322	1	0.929
rs1031587	8	128093472	a	g	0.5677	0.0033	0.145695	0.0068882	2.68e-99	++	87.5	7.98329	1	0.004721
rs7838810	8	128321202	t	c	0.6597	0.0083	0.153214	0.0072468	3.25e-99	++	95	19.8257	1	8.483e-06
rs1031589	8	128092982	a	g	0.5674	0.0035	0.14553	0.0068884	4.5e-99	++	87.6	8.03269	1	0.004594
rs4871008	8	128093541	t	c	0.4323	0.0034	-0.145519	0.0068884	4.66e-99	--	87.5	8.01685	1	0.004634
rs74822356	8	128320976	c	g	0.8225	0.0358	-0.187546	0.0088917	9.39e-99	--	82	5.55318	1	0.01845
rs34115425	10	51510300	ca	c	0.4148	0	0.1728	0.0082	1.4e-98	+?	0	0	0	1
rs72728061	8	128321583	t	c	0.8218	0.0351	-0.186167	0.0088351	1.45e-98	--	83.1	5.90494	1	0.0151
rs17632542	19	51361757	t	c	0.9249	0.004	0.289355	0.0137449	2.2e-98	++	63.6	2.74581	1	0.09751
rs72728057	8	128321413	a	c	0.8218	0.0351	-0.185984	0.0088351	2.26e-98	--	83.1	5.91863	1	0.01498
rs76765083	19	51362715	t	g	0.9249	0.004	0.289307	0.0137445	2.34e-98	++	65.4	2.89159	1	0.08904
rs62113214	19	51362537	t	g	0.9248	0.004	0.289079	0.0137445	3.33e-98	++	65.1	2.86124	1	0.09074
rs7001504	8	128094483	t	g	0.4311	0.0028	-0.144812	0.0068886	4.12e-98	--	87.3	7.87052	1	0.005025
rs62113212	19	51360840	t	c	0.0749	0.0045	-0.289664	0.0137793	4.16e-98	--	63.5	2.74172	1	0.09776
rs72728059	8	128321483	t	c	0.8218	0.035	-0.185641	0.0088351	5.12e-98	--	83.5	6.04576	1	0.01394
rs6981122	8	128094460	a	c	0.4316	0.003	-0.144698	0.0068884	5.79e-98	--	87.5	7.98844	1	0.004708
rs386743607	10	51543070	t	g	0.4173	0	0.168	0.008	6.56e-98	+?	0	0	0	1
rs71046509	11	68987167	t	ta	0.1647	0	0.2181	0.0104	1.2e-97	+?	0	0	0	1
rs1418284072	8	128183871	a	g	0.9778	0	-0.5157	0.0246	1.42e-97	-?	0	0	0	1
rs111362352	19	51365440	t	c	0.0758	0.0044	-0.28655	0.013685	2.36e-97	--	60.4	2.5257	1	0.112
rs4306255	10	51542444	a	g	0.4174	0	0.1675	0.008	2.44e-97	+?	0	0	0	1
rs1395287	8	128338702	c	g	0.6654	0.0156	0.151824	0.007276	1.08e-96	++	92.4	13.1549	1	0.0002868
rs16902147	8	128405072	t	c	0.9652	0.009	-0.372668	0.017875	1.57e-96	--	88.3	8.5632	1	0.00343
rs13256367	8	128334900	a	c	0.6657	0.016	0.151623	0.0072776	2.11e-96	++	91.9	12.3193	1	0.0004483
rs7216498	17	69110932	t	c	0.4964	0.0097	-0.14137	0.0068008	5.64e-96	--	91.8	12.1811	1	0.0004828
rs4239217	17	36098987	a	g	0.6058	0	0.1695	0.0082	6.35e-95	+?	0	0	0	1
rs4871798	8	128479963	t	c	0.2243	0	0.318094	0.0153923	7.04e-95	?+	0	0	0	1
rs62516012	8	128335526	c	g	0.7284	0.0202	0.160248	0.0077706	1.73e-94	++	88.9	9.04316	1	0.002637
rs757211	17	36096478	t	c	0.4502	0	0.167	0.0081	1.92e-94	+?	0	0	0	1
rs7830776	8	128471490	t	c	0.5984	0.0307	-0.143669	0.0070027	1.54e-93	--	96.3	27.2421	1	1.795e-07
rs1447293	8	128472320	t	c	0.5982	0.03	-0.142261	0.0069375	1.89e-93	--	96.6	29.3757	1	5.962e-08
rs66883347	17	69117532	g	gttat	0.4744	0	0.1617	0.0079	4.12e-93	+?	0	0	0	1
rs72714537	8	128486844	t	c	0.8517	0.0103	0.206087	0.0100721	4.77e-93	++	86.5	7.38959	1	0.00656
rs1427149633	17	69110923	a	g	0.4807	0	0.1614	0.0079	8.98e-93	+?	0	0	0	1
rs10107982	8	128318755	t	c	0.7344	0.0187	0.160124	0.0078441	1.27e-92	++	86.5	7.42534	1	0.006431
rs56966654	17	69111219	caa	c	0.4809	0	0.1612	0.0079	1.51e-92	+?	0	0	0	1
rs11004324	10	51496623	t	g	0.625	0	-0.1673	0.0082	1.59e-92	-?	0	0	0	1
rs1375631616	17	69104938	a	g	0.4742	0	0.1611	0.0079	1.95e-92	+?	0	0	0	1
rs1218788595	17	69118437	a	t	0.4749	0	0.161	0.0079	2.53e-92	+?	0	0	0	1
rs28451380	10	51489780	c	g	0.3754	0	0.1691	0.0083	2.87e-92	+?	0	0	0	1
rs73351629	8	128018466	c	g	0.6773	0.0187	0.15019	0.0073734	3.13e-92	++	88.9	9.0051	1	0.002692
rs34135040	10	51497155	ct	c	0.6245	0	-0.1666	0.0082	9.08e-92	-?	0	0	0	1
rs12781411	10	51491589	t	c	0.3741	0	0.1683	0.0083	2.05e-91	+?	0	0	0	1
rs1213914938	10	51495349	t	c	0.6259	0	-0.1662	0.0082	2.45e-91	-?	0	0	0	1
rs111724742	8	128108418	t	g	0.9866	0	-1.01125	0.0499642	4.4e-91	?-	0	0	0	1
rs17464492	8	128342866	a	g	0.7275	0.0201	0.156542	0.0077719	3.15e-90	++	90	10.0408	1	0.001531
rs35716372	10	51489224	a	g	0.3612	0	0.169	0.0084	5.03e-90	+?	0	0	0	1
rs6579000	11	2232042	t	c	0.7896	0.0189	-0.166299	0.008269	5.91e-90	--	0	0.608069	1	0.4355
rs7127900	11	2233574	a	g	0.2105	0.0188	0.166257	0.008269	6.55e-90	++	0	0.620609	1	0.4308
rs11043143	11	2234093	t	c	0.2104	0.0189	0.166276	0.0082703	6.64e-90	++	0	0.585795	1	0.444
rs7121039	11	2232911	c	g	0.2105	0.0188	0.166234	0.0082688	6.82e-90	++	0	0.597455	1	0.4396
rs11043133	11	2232665	a	g	0.7895	0.0188	-0.166234	0.0082688	6.82e-90	--	0	0.597455	1	0.4396
rs7121452	11	2233234	t	c	0.7895	0.0188	-0.166234	0.0082688	6.82e-90	--	0	0.597455	1	0.4396
rs7123418	11	2232378	a	c	0.2104	0.0189	0.166233	0.0082688	6.84e-90	++	0	0.597793	1	0.4394
rs6579002	11	2232229	a	g	0.2104	0.0189	0.166183	0.0082683	7.55e-90	++	0	0.554484	1	0.4565
rs11043132	11	2232624	t	c	0.2106	0.0188	0.166163	0.0082688	8.12e-90	++	0	0.589018	1	0.4428
rs11603101	11	2232814	t	c	0.7895	0.0188	-0.166143	0.008269	8.6e-90	--	0	0.594846	1	0.4406
rs66754298	11	2233485	c	g	0.2105	0.0188	0.166138	0.008269	8.7e-90	++	0	0.596283	1	0.44
rs7127599	11	2233365	a	g	0.2106	0.0188	0.166092	0.0082688	9.65e-90	++	0	0.580641	1	0.4461
rs6579003	11	2232310	a	c	0.2104	0.0189	0.166091	0.0082688	9.69e-90	++	0	0.58097	1	0.4459
rs6578999	11	2231774	t	g	0.7894	0.0187	-0.166084	0.0082691	1e-89	--	0	0.583113	1	0.4451
rs61850098	10	51486999	a	g	0.6292	0	-0.1687	0.0084	1.03e-89	-?	0	0	0	1
rs7123299	11	2232344	a	g	0.2103	0.0189	0.16602	0.0082688	1.15e-89	++	0	0.572651	1	0.4492
rs7123312	11	2232359	a	g	0.2106	0.0188	0.165948	0.0082688	1.37e-89	++	0	0.564392	1	0.4525
rs7109474	11	2233219	a	g	0.7894	0.0188	-0.165878	0.0082688	1.62e-89	--	0	0.555871	1	0.4559
rs7395734	11	2231694	t	c	0.7894	0.0188	-0.165871	0.0082691	1.68e-89	--	0	0.558123	1	0.455
rs1563681609	8	128420265	a	g	0.5838	0	-0.1604	0.008	2.02e-89	-?	0	0	0	1
rs28561575	8	128014009	t	c	0.2616	0.0083	-0.157558	0.0078616	2.39e-89	--	87.5	7.99433	1	0.004692
rs28556804	8	128014315	a	g	0.7404	0.0093	0.157642	0.007872	3.29e-89	++	85.6	6.95722	1	0.008348
rs4076054	11	2231341	a	g	0.7886	0.0195	-0.165425	0.0082642	3.92e-89	--	0	0.598645	1	0.4391
rs7463326	8	128027954	a	g	0.2514	0.0059	-0.158904	0.0079452	5.5e-89	--	86.2	7.26788	1	0.00702
rs2611491	10	51489393	t	g	0.3693	0	0.168	0.0084	5.51e-89	+?	0	0	0	1
rs2125771	10	51506957	t	c	0.5278	0	-0.158	0.0079	5.51e-89	-?	0	0	0	1
rs7481129	11	2230460	a	c	0.2111	0.0184	0.16529	0.0082693	6.959e-89	++	0	0.497605	1	0.4806
rs4077456	11	2230152	a	g	0.2112	0.0184	0.165218	0.0082694	8.315e-89	++	0	0.490279	1	0.4838
rs11460298	10	51526051	ct	c	0.4888	0	-0.1698	0.0085	8.825e-89	-?	0	0	0	1
rs7816007	8	128012359	a	g	0.7363	0.0048	0.156919	0.007858	1.016e-88	++	87.9	8.29678	1	0.003972
rs201557676	11	68998188	a	ag	0.4983	0	0.1577	0.0079	1.178e-88	+?	0	0	0	1
rs1491419759	10	51502436	a	t	0.4724	0	0.1576	0.0079	1.518e-88	+?	0	0	0	1
rs1362743599	10	51502802	c	g	0.5276	0	-0.1576	0.0079	1.518e-88	-?	0	0	0	1
rs2611471	10	51503559	c	g	0.5276	0	-0.1576	0.0079	1.518e-88	-?	0	0	0	1
rs796534486	11	69003581	a	t	0.4983	0	0.1576	0.0079	1.518e-88	+?	0	0	0	1
rs1317771561	10	51504797	a	t	0.5277	0	-0.1575	0.0079	1.955e-88	-?	0	0	0	1
rs2611475	10	51503178	a	g	0.5278	0	-0.1575	0.0079	1.955e-88	-?	0	0	0	1
rs1487240	8	128021752	a	g	0.7474	0.0062	0.158266	0.0079423	2.379e-88	++	85.4	6.8654	1	0.008788
rs2611502	10	51500301	a	g	0.4723	0	0.1573	0.0079	3.242e-88	+?	0	0	0	1
rs9297750	8	128022973	a	g	0.7477	0.0061	0.158043	0.0079422	4.143e-88	++	85.8	7.06609	1	0.007856
rs11004584	10	51500088	t	g	0.5277	0	-0.1572	0.0079	4.173e-88	-?	0	0	0	1
rs11005075	10	51510482	a	g	0.5281	0	-0.1572	0.0079	4.173e-88	-?	0	0	0	1
rs17467139	8	128412010	a	g	0.9471	0.006	-0.286231	0.0143878	4.579e-88	--	98.2	54.5462	1	1.518e-13
rs11421935	11	68984743	a	ag	0.4954	0	-0.1571	0.0079	5.372e-88	-?	0	0	0	1
rs869304987	10	51501276	ca	c	0.4727	0	0.1571	0.0079	5.372e-88	+?	0	0	0	1
rs1267742712	11	68986495	a	c	0.4955	0	-0.1571	0.0079	5.372e-88	-?	0	0	0	1
rs7405776	17	36093022	a	g	0.3717	0	-0.165	0.0083	6.122e-88	-?	0	0	0	1
rs78416326	3	170074517	c	g	0.2079	0.0028	-0.173132	0.0087119	6.959e-88	--	0	0.35658	1	0.5504
rs55848837	10	51502552	t	g	0.5282	0	-0.1569	0.0079	8.896e-88	-?	0	0	0	1
rs34578388	17	69106887	a	at	0.5229	0	-0.1608	0.0081	1.062e-87	-?	0	0	0	1
rs3837868	17	36092671	t	ta	0.6302	0	0.1667	0.0084	1.212e-87	+?	0	0	0	1
rs1554935230	10	51504493	a	c	0.5294	0	-0.1566	0.0079	1.893e-87	-?	0	0	0	1
rs1555017797	11	68994497	t	g	0.4959	0	-0.1565	0.0079	2.435e-87	-?	0	0	0	1
rs4448631	10	51506284	t	c	0.471	0	0.1564	0.0079	3.13e-87	+?	0	0	0	1
rs57858801	10	51502574	a	t	0.529	0	-0.1564	0.0079	3.13e-87	-?	0	0	0	1
rs4935573	10	51504385	a	g	0.5284	0	-0.1564	0.0079	3.13e-87	-?	0	0	0	1
rs10763193	10	51504938	a	g	0.471	0	0.1564	0.0079	3.13e-87	+?	0	0	0	1
rs898343	10	51505403	a	g	0.529	0	-0.1564	0.0079	3.13e-87	-?	0	0	0	1
rs12412140	10	51503977	t	c	0.5289	0	-0.1563	0.0079	4.024e-87	-?	0	0	0	1
rs11135766	8	23533623	t	c	0.557	0.0276	-0.135643	0.0068567	4.208e-87	--	60.3	2.52055	1	0.1124
rs2843560	10	51512129	c	g	0.5286	0	-0.1562	0.0079	5.172e-87	-?	0	0	0	1
rs2262569	10	51513871	t	c	0.4714	0	0.1562	0.0079	5.172e-87	+?	0	0	0	1
rs2125770	10	51514824	t	c	0.4713	0	0.1562	0.0079	5.172e-87	+?	0	0	0	1
rs7090326	10	51503375	a	t	0.529	0	-0.1562	0.0079	5.172e-87	-?	0	0	0	1
rs56769784	8	127996919	a	c	0.7398	0.0078	0.155518	0.007868	5.839e-87	++	87.7	8.10683	1	0.00441
rs61850095	10	51485001	t	c	0.6363	0	-0.168	0.0085	5.995e-87	-?	0	0	0	1
rs11293277	17	69106000	g	gt	0.5396	0	-0.1581	0.008	6.262e-87	-?	0	0	0	1
rs56385838	17	36092841	g	gt	0.6292	0	0.166	0.0084	6.337e-87	+?	0	0	0	1
rs11004422	10	51498336	a	g	0.5293	0	-0.1561	0.0079	6.647e-87	-?	0	0	0	1
rs11004435	10	51498493	a	c	0.4706	0	0.156	0.0079	8.54e-87	+?	0	0	0	1
rs11599333	10	51499655	a	c	0.5293	0	-0.156	0.0079	8.54e-87	-?	0	0	0	1
rs11004409	10	51498019	c	g	0.4706	0	0.156	0.0079	8.54e-87	+?	0	0	0	1
rs2611512	10	51515534	a	g	0.4718	0	0.156	0.0079	8.54e-87	+?	0	0	0	1
rs12763717	10	51500874	c	g	0.5295	0	-0.1558	0.0079	1.409e-86	-?	0	0	0	1
rs13272392	8	23528511	a	t	0.5546	0.0277	-0.135148	0.0068555	1.646e-86	--	62.7	2.67794	1	0.1017
rs11004415	10	51498181	a	g	0.4706	0	0.1557	0.0079	1.81e-86	+?	0	0	0	1
rs13262167	8	23535219	a	c	0.5564	0.0272	-0.135132	0.006857	1.864e-86	--	62.5	2.66897	1	0.1023
rs4872175	8	23534802	a	g	0.4426	0.0278	0.13506	0.0068568	2.278e-86	++	62.8	2.69095	1	0.1009
rs13265330	8	23525543	t	c	0.5533	0.0272	-0.135032	0.0068564	2.417e-86	--	63.6	2.74765	1	0.0974
rs1160267	8	23529521	a	g	0.5535	0.0272	-0.134927	0.0068551	3.033e-86	--	60.1	2.50445	1	0.1135
rs7821330	8	23522452	t	c	0.5548	0.0274	-0.134942	0.006856	3.054e-86	--	59.1	2.44221	1	0.1181
rs1606303	8	23524744	c	g	0.4462	0.0272	0.134921	0.0068555	3.157e-86	++	63.5	2.7367	1	0.09807
rs995432	8	23522851	a	g	0.5546	0.0275	-0.134815	0.0068562	4.457e-86	--	61.2	2.57523	1	0.1085
rs373451951	11	69011693	a	t	0.5003	0	-0.1573	0.008	4.519e-86	-?	0	0	0	1
rs80141249	10	51480647	a	t	0.614	0	-0.1671	0.0085	4.859e-86	-?	0	0	0	1
rs1512268	8	23526463	t	c	0.4461	0.0274	0.134502	0.0068549	1.016e-85	++	63.2	2.72017	1	0.09909
rs79866008	8	127992639	a	g	0.7384	0.009	0.154218	0.0078644	1.281e-85	++	87.8	8.20905	1	0.004168
rs34886083	8	128419789	t	c	0.0554	0.0071	0.276593	0.0141068	1.346e-85	++	98.4	61.0575	1	5.543e-15
rs3760511	17	36106313	t	g	0.6657	0	-0.1626	0.0083	1.869e-85	-?	0	0	0	1
rs139046764	8	128177812	a	g	0.0115	0	0.6812	0.0348	2.541e-85	+?	0	0	0	1
rs35024453	11	68987903	ct	c	0.1278	0	0.2249	0.0115	3.63e-85	+?	0	0	0	1
rs965593192	11	69011692	g	gt	0.502	0	-0.1564	0.008	4.125e-85	-?	0	0	0	1
rs10743180	11	2229573	t	g	0.7961	0.0194	-0.162607	0.0083478	1.653e-84	--	0	0.295452	1	0.5867
rs118097379	8	128418882	t	c	0.0555	0.0071	0.274669	0.014107	1.959e-84	++	98.4	62.0549	1	3.34e-15
rs78098257	8	128426196	t	g	0.9445	0.0071	-0.274604	0.0141067	2.122e-84	--	98.4	62.3252	1	2.912e-15
rs13267884	8	23531987	a	g	0.4363	0.0285	0.133349	0.0068579	3.242e-84	++	50.4	2.01575	1	0.1557
rs7126629	11	2228952	a	c	0.7961	0.0195	-0.1623	0.0083481	3.429e-84	--	0	0.276821	1	0.5988
rs10840584	11	2228618	t	c	0.2038	0.0195	0.162285	0.0083481	3.565e-84	++	0	0.279845	1	0.5968
rs72853963	11	2224664	a	g	0.1878	0.0062	0.165931	0.008537	3.785e-84	++	0	0.0103862	1	0.9188
rs7126857	11	2229111	t	c	0.7962	0.0195	-0.162225	0.008348	4.078e-84	--	0	0.271878	1	0.6021
rs7114836	11	2229012	a	g	0.7961	0.0195	-0.162081	0.0083481	5.717e-84	--	0	0.261054	1	0.6094
rs6470494	8	128087904	t	c	0.2793	0.0032	0.144004	0.0074368	1.562e-83	++	55.8	2.26224	1	0.1326
rs78654475	8	128408645	a	c	0.0563	0.0074	0.27123	0.0140314	2.991e-83	++	98.4	60.8319	1	6.216e-15
rs61850085	10	51470151	c	g	0.3973	0	0.1662	0.0086	3.273e-83	+?	0	0	0	1
rs1448058364	10	51492786	a	c	0.3969	0	0.1604	0.0083	3.291e-83	+?	0	0	0	1
rs77283842	10	51480648	a	t	0.612	0	-0.1657	0.0086	1.008e-82	-?	0	0	0	1
rs16902152	8	128407961	a	g	0.0567	0.0076	0.268936	0.0139673	1.289e-82	++	98.4	63.0211	1	2.045e-15
rs181069596	8	128330539	c	g	0.0237	0	0.727831	0.037825	1.645e-82	?+	0	0	0	1
rs75078154	8	128406325	a	g	0.9434	0.0076	-0.27013	0.014039	1.669e-82	--	98.4	62.7524	1	2.344e-15
rs76008904	8	128407369	c	g	0.9437	0.0075	-0.270053	0.0140401	1.908e-82	--	98.4	63.0479	1	2.017e-15
rs3216929	17	36093863	g	gcagacaga	0.3875	0	-0.1613	0.0084	3.535e-82	-?	0	0	0	1
rs6501438	17	69120160	a	g	0.4519	0.0143	0.130546	0.0067996	3.766e-82	++	84.9	6.62771	1	0.01004
rs7843737	8	128088066	a	g	0.3307	0.0065	-0.140635	0.0073334	5.707e-82	--	91.8	12.2383	1	0.0004682
rs13253127	8	128496591	t	c	0.4709	0.0384	0.13038	0.0068048	7.988e-82	++	95.4	21.8985	1	2.875e-06
rs16902149	8	128407105	c	g	0.0566	0.0077	0.267279	0.0139711	1.399e-81	++	98.5	64.5398	1	9.46e-16
rs57532727	8	128100029	ca	c	0.1066	0	0.2714	0.0142	1.98e-81	+?	0	0	0	1
rs2121630	8	128478160	t	g	0.112	0	0.376766	0.0197207	2.29e-81	?+	0	0	0	1
rs4630240	10	51532528	a	g	0.4074	0	-0.1585	0.0083	2.706e-81	-?	0	0	0	1
rs66462216	10	51512393	a	at	0.5065	0	0.1564	0.0082	4.219e-81	+?	0	0	0	1
rs11002357	10	51477149	a	g	0.6158	0	-0.1621	0.0085	4.433e-81	-?	0	0	0	1
rs67143603	17	36108231	t	c	0.6722	0	-0.16	0.0084	6.876e-81	-?	0	0	0	1
rs1992833	8	128492344	t	g	0.4732	0.0401	0.129312	0.0068029	1.455e-80	++	94.9	19.6688	1	9.209e-06
rs11002583	10	51477663	t	g	0.3854	0	0.1615	0.0085	1.705e-80	+?	0	0	0	1
rs11002501	10	51477471	t	c	0.6147	0	-0.1615	0.0085	1.705e-80	-?	0	0	0	1
rs587948	8	128341680	t	g	0.6136	0.0169	0.13315	0.0070087	1.781e-80	++	96.1	25.3643	1	4.746e-07
rs76925190	3	170066339	a	c	0.8138	0.0077	0.17239	0.009081	2.332e-80	++	0	0.722461	1	0.3953
rs6501437	17	69119972	c	g	0.5436	0.0138	-0.130262	0.0068643	2.657e-80	--	83.9	6.20898	1	0.01271
rs78286574	8	128405832	a	g	0.0603	0.0071	0.262431	0.0138318	2.852e-80	++	98.1	51.927	1	5.76e-13
rs623401	8	128341727	c	g	0.6136	0.0168	0.13285	0.0070088	4.026e-80	++	96.1	25.6147	1	4.168e-07
rs1668875	8	128341103	c	g	0.3881	0.0178	-0.132652	0.0070087	6.873e-80	--	96.1	25.8676	1	3.656e-07
rs200586805	8	127966937	cctt	c	0.9638	0	-0.614502	0.0324783	7.748e-80	?-	0	0	0	1
rs6990480	8	128469708	a	g	0.9229	0.0052	-0.239248	0.0126487	8.609e-80	--	44.3	1.79454	1	0.1804
rs10840606	11	2234690	a	g	0.8138	0.0068	-0.162472	0.0086111	2.101e-79	--	0	0.0886997	1	0.7658
rs28615829	8	128018205	a	g	0.2956	0.0086	-0.14135	0.0075187	7.574e-79	--	89.6	9.58296	1	0.001964
rs189897331	8	23507360	t	g	0.4271	0.0287	0.128603	0.0068589	1.942e-78	++	80.4	5.10457	1	0.02386
rs13256300	8	23502588	t	c	0.4262	0.029	0.128556	0.0068585	2.161e-78	++	79.8	4.94229	1	0.02621
rs7830220	8	23499683	t	c	0.5734	0.0291	-0.128567	0.0068596	2.217e-78	--	79.8	4.95905	1	0.02595
rs1398240	8	23501606	a	c	0.5737	0.029	-0.128534	0.0068586	2.311e-78	--	79.2	4.81238	1	0.02826
rs146486133	8	23504658	t	c	0.4263	0.029	0.12847	0.0068584	2.728e-78	++	79.8	4.95688	1	0.02599
rs71504412	8	23502965	c	g	0.5728	0.0285	-0.12848	0.0068591	2.744e-78	--	79.4	4.86372	1	0.02743
rs4242403	8	23514185	t	c	0.5738	0.029	-0.128455	0.0068582	2.812e-78	--	79.8	4.93995	1	0.02624
rs4872171	8	23514289	a	g	0.4265	0.0288	0.128358	0.0068582	3.675e-78	++	79.8	4.94397	1	0.02618
rs17830059	8	128016373	c	g	0.7028	0.0095	0.14068	0.0075176	3.856e-78	++	89.3	9.33571	1	0.002247
rs13262683	8	23515679	t	c	0.4266	0.0287	0.128338	0.0068585	3.919e-78	++	80.1	5.03196	1	0.02488
rs73351641	8	128025212	a	g	0.2959	0.0091	-0.140678	0.0075199	4.294e-78	--	89	9.0726	1	0.002595
rs13256366	8	23502660	t	c	0.4258	0.0293	0.128262	0.0068585	4.83e-78	++	80.2	5.05769	1	0.02452
rs77658498	3	170105309	a	actt	0.2221	0.0202	-0.160054	0.008559	4.947e-78	--	75.2	4.03579	1	0.04454
rs1512271	8	23516500	a	t	0.5733	0.0288	-0.128231	0.0068581	5.178e-78	--	80.1	5.02227	1	0.02502
rs1398239	8	23501730	t	g	0.5743	0.0294	-0.128228	0.0068586	5.332e-78	--	80.1	5.0216	1	0.02503
rs10109680	8	128032277	a	g	0.7596	0.0022	0.151216	0.0080889	5.507e-78	++	84.1	6.29693	1	0.01209
rs2035637	8	128023059	a	c	0.2956	0.009	-0.140567	0.0075199	5.685e-78	--	89.1	9.19608	1	0.002425
rs4872172	8	23514343	t	g	0.4263	0.029	0.128185	0.0068582	5.902e-78	++	80.3	5.08148	1	0.02418
rs1551513	8	128025599	t	c	0.7037	0.0094	0.140529	0.0075199	6.233e-78	++	89.1	9.14237	1	0.002498
rs1398238	8	23517031	c	g	0.5735	0.0288	-0.128166	0.0068583	6.253e-78	--	80.2	5.06103	1	0.02447
rs2315144	8	23515527	c	g	0.5737	0.029	-0.128164	0.0068586	6.361e-78	--	79.8	4.95124	1	0.02607
rs1516942	8	128019903	a	c	0.2957	0.0091	-0.140516	0.00752	6.488e-78	--	89.2	9.26427	1	0.002337
rs4573233	8	128025263	a	g	0.2958	0.0091	-0.140454	0.0075199	7.509e-78	--	89.1	9.17736	1	0.00245
rs6651240	8	128026046	a	t	0.704	0.0092	0.140454	0.0075199	7.509e-78	++	89.1	9.17736	1	0.00245
rs1551515	8	128025404	a	t	0.2959	0.0091	-0.140454	0.0075199	7.511e-78	--	89.1	9.17762	1	0.00245
rs10481164	8	128027962	a	g	0.2959	0.0091	-0.140419	0.0075199	8.223e-78	--	89.2	9.26809	1	0.002332
rs17762878	8	128025053	a	g	0.7035	0.0095	0.140379	0.0075199	9.044e-78	++	89.1	9.21242	1	0.002404
rs4871789	8	128428061	a	g	0.5024	0.0073	0.126703	0.0067893	1.008e-77	++	0	0.15755	1	0.6914
rs73351621	8	128014415	a	g	0.2964	0.0103	-0.140363	0.0075219	1.039e-77	--	88.4	8.65786	1	0.003257
rs2124597	8	128028337	t	c	0.7041	0.0091	0.140312	0.0075199	1.073e-77	++	89.2	9.25798	1	0.002345
rs7824011	8	128026203	c	g	0.2959	0.0091	-0.140304	0.0075199	1.091e-77	--	89.2	9.24648	1	0.002359
rs61436251	3	170083629	c	g	0.778	0.0205	0.159662	0.0085575	1.098e-77	++	76	4.1728	1	0.04108
rs7823297	8	128025916	t	c	0.2959	0.0091	-0.140247	0.00752	1.264e-77	--	89.1	9.16787	1	0.002463
rs7823764	8	128026262	a	g	0.7041	0.0091	0.140229	0.0075199	1.314e-77	++	89.2	9.28167	1	0.002315
rs16901904	8	128027502	t	c	0.7041	0.0091	0.140193	0.0075199	1.441e-77	++	89.3	9.37133	1	0.002204
rs7824393	8	128026684	a	g	0.7041	0.0091	0.140155	0.0075199	1.581e-77	++	89.3	9.31728	1	0.00227
rs17762938	8	128025857	t	c	0.7041	0.0091	0.140153	0.0075199	1.59e-77	++	89.3	9.31472	1	0.002273
rs4473999	8	128025762	t	c	0.2958	0.0092	-0.140148	0.0075202	1.635e-77	--	88.9	9.0338	1	0.00265
rs9656964	8	128025777	c	g	0.7042	0.0092	0.140073	0.0075202	1.969e-77	++	89	9.06857	1	0.0026
rs10086908	8	128011937	t	c	0.7017	0.0091	0.139817	0.0075115	2.485e-77	++	90.6	10.6383	1	0.001108
rs1949164	8	23498855	a	g	0.4275	0.0286	0.127627	0.0068593	2.857e-77	++	81.7	5.46746	1	0.01937
rs9693379	8	128022941	a	c	0.2957	0.0091	-0.139912	0.0075201	2.916e-77	--	89.2	9.25942	1	0.002343
rs74637873	8	128457094	a	c	0.9404	0.0076	-0.257335	0.013834	3.118e-77	--	98.4	62.5993	1	2.533e-15
rs180679516	8	128448203	a	g	0.0609	0.0086	0.255223	0.0137222	3.256e-77	++	98.3	60.4133	1	7.689e-15
rs7002225	8	128428823	c	g	0.495	0.0096	-0.126313	0.0067914	3.282e-77	--	0	0.20174	1	0.6533
rs72714555	8	128513780	a	c	0.8986	0.0028	0.221105	0.0118888	3.349e-77	++	81.4	5.38039	1	0.02036
rs1949163	8	23498935	t	c	0.5718	0.0282	-0.127511	0.0068596	3.966e-77	--	81.7	5.45069	1	0.01956
rs6998254	8	128428795	a	g	0.4951	0.0097	-0.126238	0.0067916	4.065e-77	--	0	0.207386	1	0.6488
rs10481163	8	128027957	t	c	0.2955	0.0089	-0.139746	0.0075199	4.373e-77	--	89.6	9.58718	1	0.001959
rs7829619	8	23499264	t	c	0.5714	0.028	-0.127359	0.0068593	5.904e-77	--	81.8	5.50459	1	0.01897
rs13251194	8	128477256	a	g	0.4805	0.0345	-0.126441	0.0068307	1.691e-76	--	95.8	23.7487	1	1.098e-06
rs11991739	8	128450729	t	c	0.9388	0.008	-0.253196	0.0136832	1.909e-76	--	98.1	52.3731	1	4.59e-13
rs78695209	8	128441505	a	g	0.0602	0.0084	0.253953	0.0137321	2.335e-76	++	98.4	61.23	1	5.078e-15
rs75753382	8	128441548	a	g	0.0601	0.0084	0.253951	0.0137321	2.341e-76	++	98.4	61.2264	1	5.087e-15
rs1388955482	11	68995278	a	g	0.1381	0	0.2163	0.0117	2.619e-76	+?	0	0	0	1
rs7835802	8	23495136	t	c	0.5717	0.028	-0.126823	0.0068611	2.758e-76	--	82.8	5.81719	1	0.01587
rs1555015958	11	68975525	c	g	0.2045	0	0.1773	0.0096	3.685e-76	+?	0	0	0	1
rs13250904	8	128477169	a	g	0.4805	0.0345	-0.126135	0.0068307	3.893e-76	--	95.8	23.9787	1	9.741e-07
rs10743181	11	2229759	a	g	0.1806	0.0202	0.16119	0.0087371	5.315e-76	++	0	0.01169	1	0.9139
rs72712390	8	128429652	a	g	0.1843	0.002	-0.166771	0.0090417	5.759e-76	--	58.3	2.40074	1	0.1213
rs10743182	11	2229782	t	c	0.8191	0.02	-0.160902	0.0087369	9.725e-76	--	0	0.0078069	1	0.9296
rs62529914	8	128101352	t	c	0.6457	0.0021	-0.129535	0.0070495	2.085e-75	--	94.4	17.9893	1	2.221e-05
rs5987397	X	51242303	a	g	0.3644	0	0.1047	0.0057	2.352e-75	+?	0	0	0	1
rs869108360	X	51245276	g	ga	0.6356	0	-0.1047	0.0057	2.352e-75	-?	0	0	0	1
rs5987438	X	51308981	a	g	0.3644	0	0.1047	0.0057	2.352e-75	+?	0	0	0	1
rs5987424	X	51242364	a	g	0.364	0	0.1047	0.0057	2.352e-75	+?	0	0	0	1
rs6614317	X	51309801	t	c	0.3648	0	0.1047	0.0057	2.352e-75	+?	0	0	0	1
rs1541240	X	51288111	a	t	0.6348	0	-0.1047	0.0057	2.352e-75	-?	0	0	0	1
rs1592303	X	51290282	t	c	0.3646	0	0.1047	0.0057	2.352e-75	+?	0	0	0	1
rs1343272	X	51307940	c	g	0.3646	0	0.1047	0.0057	2.352e-75	+?	0	0	0	1
rs2105379	X	51305144	a	g	0.3644	0	0.1046	0.0057	3.248e-75	+?	0	0	0	1
rs201054718	X	51304763	t	tac	0.6352	0	-0.1046	0.0057	3.248e-75	-?	0	0	0	1
rs4907779	X	51297781	t	g	0.3644	0	0.1046	0.0057	3.248e-75	+?	0	0	0	1
rs1936036	X	51310821	a	g	0.3648	0	0.1046	0.0057	3.248e-75	+?	0	0	0	1
rs5945575	X	51294365	t	c	0.3644	0	0.1046	0.0057	3.248e-75	+?	0	0	0	1
rs1936037	X	51310376	t	c	0.6356	0	-0.1046	0.0057	3.248e-75	-?	0	0	0	1
rs5945621	X	51242881	a	c	0.3644	0	0.1046	0.0057	3.248e-75	+?	0	0	0	1
rs6521813	X	51296216	t	c	0.3651	0	0.1046	0.0057	3.248e-75	+?	0	0	0	1
rs4907777	X	51297068	a	g	0.3649	0	0.1046	0.0057	3.248e-75	+?	0	0	0	1
rs5945644	X	51309461	a	c	0.3645	0	0.1046	0.0057	3.248e-75	+?	0	0	0	1
rs1891702	X	51245461	a	c	0.6355	0	-0.1046	0.0057	3.248e-75	-?	0	0	0	1
rs4366746	17	69121631	c	g	0.5522	0.0095	-0.124785	0.0068016	3.514e-75	--	82.9	5.84394	1	0.01563
rs79012498	8	128153320	t	c	0.9538	0.0041	-0.285261	0.0155563	4.167e-75	--	98.2	56.0887	1	6.928e-14
rs61255884	X	51280005	a	g	0.3669	0	0.1045	0.0057	4.486e-75	+?	0	0	0	1
rs4907773	X	51246644	a	t	0.3642	0	0.1045	0.0057	4.486e-75	+?	0	0	0	1
rs60513163	X	51280003	c	g	0.3669	0	0.1045	0.0057	4.486e-75	+?	0	0	0	1
rs4907780	X	51298031	t	c	0.6351	0	-0.1045	0.0057	4.486e-75	-?	0	0	0	1
rs4907800	X	51297046	t	c	0.6351	0	-0.1045	0.0057	4.486e-75	-?	0	0	0	1
rs5945635	X	51283616	t	c	0.3646	0	0.1045	0.0057	4.486e-75	+?	0	0	0	1
rs1578828	X	51289760	a	g	0.3649	0	0.1045	0.0057	4.486e-75	+?	0	0	0	1
rs4907778	X	51297736	a	g	0.366	0	0.1045	0.0057	4.486e-75	+?	0	0	0	1
rs1292339655	10	51489577	t	tcctggcccccgctcc	0.5883	0	-0.1484	0.0081	5.628e-75	-?	0	0	0	1
rs75970332	8	128148610	t	c	0.046	0.004	0.2853	0.0155747	5.929e-75	++	98.3	57.438	1	3.488e-14
rs5987437	X	51285741	t	c	0.6347	0	-0.1044	0.0057	6.192e-75	-?	0	0	0	1
rs5987436	X	51285680	t	g	0.6351	0	-0.1044	0.0057	6.192e-75	-?	0	0	0	1
rs6614313	X	51283113	t	c	0.6347	0	-0.1044	0.0057	6.192e-75	-?	0	0	0	1
rs4907797	X	51282791	a	c	0.6351	0	-0.1044	0.0057	6.192e-75	-?	0	0	0	1
rs145384953	X	51276100	a	g	0.6346	0	-0.1044	0.0057	6.192e-75	-?	0	0	0	1
rs6614438	X	51280177	a	g	0.6347	0	-0.1044	0.0057	6.192e-75	-?	0	0	0	1
rs6521810	X	51284837	a	t	0.6347	0	-0.1044	0.0057	6.192e-75	-?	0	0	0	1
rs5987434	X	51278195	t	g	0.3653	0	0.1044	0.0057	6.192e-75	+?	0	0	0	1
rs1541241	X	51287789	t	g	0.3653	0	0.1044	0.0057	6.192e-75	+?	0	0	0	1
rs56155607	X	51280077	a	g	0.6347	0	-0.1044	0.0057	6.192e-75	-?	0	0	0	1
rs2185882	X	51286693	t	c	0.3653	0	0.1044	0.0057	6.192e-75	+?	0	0	0	1
rs139174061	X	51277898	a	g	0.3653	0	0.1044	0.0057	6.192e-75	+?	0	0	0	1
rs66592032	11	68944357	a	g	0.2829	0.0039	0.137529	0.0075096	6.432e-75	++	0	0.883792	1	0.3472
rs12420758	11	68946691	a	g	0.2834	0.0042	0.137511	0.0075098	6.776e-75	++	0	0.963198	1	0.3264
rs8079315	17	69120855	t	c	0.5516	0.0092	-0.124535	0.0068021	7.088e-75	--	83.1	5.90714	1	0.01508
rs2190697	17	69121341	a	g	0.4483	0.0092	0.124519	0.0068018	7.301e-75	++	83.1	5.92489	1	0.01493
rs9643224	8	128494111	a	g	0.4778	0.0404	-0.125145	0.006838	8.041e-75	--	95.7	23.4176	1	1.304e-06
rs1970956	X	51268378	a	t	0.3654	0	0.1043	0.0057	8.546e-75	+?	0	0	0	1
rs6614432	X	51276274	t	c	0.3653	0	0.1043	0.0057	8.546e-75	+?	0	0	0	1
rs9803157	X	51275125	t	c	0.6351	0	-0.1043	0.0057	8.546e-75	-?	0	0	0	1
rs5945619	X	51241672	t	c	0.636	0	-0.1043	0.0057	8.546e-75	-?	0	0	0	1
rs5945631	X	51268884	a	g	0.6346	0	-0.1043	0.0057	8.546e-75	-?	0	0	0	1
rs6614429	X	51272577	a	g	0.6351	0	-0.1043	0.0057	8.546e-75	-?	0	0	0	1
rs6521808	X	51272865	a	g	0.6346	0	-0.1043	0.0057	8.546e-75	-?	0	0	0	1
rs12388771	X	51266884	a	c	0.3654	0	0.1043	0.0057	8.546e-75	+?	0	0	0	1
rs6614426	X	51264424	a	g	0.6346	0	-0.1043	0.0057	8.546e-75	-?	0	0	0	1
rs10531904	X	51249758	t	tatga	0.6365	0	-0.1043	0.0057	8.546e-75	-?	0	0	0	1
rs1970957	X	51268450	a	g	0.365	0	0.1043	0.0057	8.546e-75	+?	0	0	0	1
rs6614428	X	51272176	a	g	0.3649	0	0.1043	0.0057	8.546e-75	+?	0	0	0	1
rs4907795	X	51261068	t	c	0.3649	0	0.1043	0.0057	8.546e-75	+?	0	0	0	1
rs4907792	X	51248783	t	c	0.636	0	-0.1043	0.0057	8.546e-75	-?	0	0	0	1
rs4907794	X	51260880	a	g	0.6347	0	-0.1043	0.0057	8.546e-75	-?	0	0	0	1
rs3999773	8	128475582	a	t	0.473	0.0342	-0.125083	0.0068368	8.973e-75	--	96.2	26.5171	1	2.612e-07
rs2190696	17	69121331	a	g	0.4483	0.0092	0.12437	0.0068018	1.094e-74	++	82.9	5.86402	1	0.01545
rs4366747	17	69121643	a	g	0.552	0.0093	-0.124351	0.0068016	1.137e-74	--	82.3	5.64652	1	0.01749
rs17824565	17	69122468	t	c	0.4488	0.0089	0.124339	0.0068015	1.173e-74	++	82.3	5.66073	1	0.01735
rs5945626	X	51253779	t	g	0.6345	0	-0.1042	0.0057	1.179e-74	-?	0	0	0	1
rs141135935	X	51256992	a	g	0.3655	0	0.1042	0.0057	1.179e-74	+?	0	0	0	1
rs5945628	X	51256561	a	t	0.3647	0	0.1042	0.0057	1.179e-74	+?	0	0	0	1
rs5945629	X	51260072	t	c	0.6345	0	-0.1042	0.0057	1.179e-74	-?	0	0	0	1
rs6521804	X	51259966	t	c	0.6345	0	-0.1042	0.0057	1.179e-74	-?	0	0	0	1
rs5987429	X	51259693	t	c	0.6345	0	-0.1042	0.0057	1.179e-74	-?	0	0	0	1
rs5945630	X	51260246	t	c	0.6345	0	-0.1042	0.0057	1.179e-74	-?	0	0	0	1
rs4907793	X	51260563	a	g	0.3655	0	0.1042	0.0057	1.179e-74	+?	0	0	0	1
rs12384969	X	51255779	c	g	0.3655	0	0.1042	0.0057	1.179e-74	+?	0	0	0	1
rs1936038	X	51251421	t	c	0.6342	0	-0.1042	0.0057	1.179e-74	-?	0	0	0	1
rs6521809	X	51279295	t	g	0.6343	0	-0.1042	0.0057	1.179e-74	-?	0	0	0	1
rs12556076	X	51260348	a	t	0.3651	0	0.1042	0.0057	1.179e-74	+?	0	0	0	1
rs6614427	X	51272085	a	g	0.6346	0	-0.1042	0.0057	1.179e-74	-?	0	0	0	1
rs5945624	X	51252928	a	g	0.6352	0	-0.1042	0.0057	1.179e-74	-?	0	0	0	1
rs6614419	X	51251800	a	g	0.6345	0	-0.1042	0.0057	1.179e-74	-?	0	0	0	1
rs7064349	X	51260521	a	g	0.3651	0	0.1042	0.0057	1.179e-74	+?	0	0	0	1
rs145020581	X	51255883	c	g	0.6351	0	-0.1042	0.0057	1.179e-74	-?	0	0	0	1
rs201128567	X	51256998	a	c	0.3655	0	0.1042	0.0057	1.179e-74	+?	0	0	0	1
rs2153993	X	51269739	t	c	0.3653	0	0.1042	0.0057	1.179e-74	+?	0	0	0	1
rs5945573	X	51254350	t	g	0.3655	0	0.1042	0.0057	1.179e-74	+?	0	0	0	1
rs28838700	X	51274223	a	g	0.3653	0	0.1042	0.0057	1.179e-74	+?	0	0	0	1
rs4907796	X	51261249	t	c	0.3651	0	0.1042	0.0057	1.179e-74	+?	0	0	0	1
rs28576473	10	51462703	a	t	0.3494	0	0.1608	0.0088	1.365e-74	+?	0	0	0	1
rs5987398	X	51275600	c	g	0.6343	0	-0.1041	0.0057	1.626e-74	-?	0	0	0	1
rs5987431	X	51275819	c	g	0.3641	0	0.1041	0.0057	1.626e-74	+?	0	0	0	1
rs4907775	X	51263200	a	g	0.6348	0	-0.1041	0.0057	1.626e-74	-?	0	0	0	1
rs5945625	X	51253427	t	c	0.6346	0	-0.1041	0.0057	1.626e-74	-?	0	0	0	1
rs4907776	X	51282499	a	g	0.6355	0	-0.1041	0.0057	1.626e-74	-?	0	0	0	1
rs6614434	X	51279297	a	g	0.6343	0	-0.1041	0.0057	1.626e-74	-?	0	0	0	1
rs17224666	17	69122480	a	c	0.4489	0.0088	0.124191	0.0068015	1.749e-74	++	82.1	5.59959	1	0.01796
rs7206958	17	69125507	t	c	0.5512	0.0089	-0.124186	0.0068013	1.754e-74	--	82.2	5.60454	1	0.01791
rs9302932	17	69123559	a	g	0.551	0.0088	-0.124186	0.0068014	1.762e-74	--	82.2	5.6046	1	0.01791
rs6501440	17	69125032	t	c	0.4488	0.0089	0.124183	0.0068014	1.769e-74	++	82.2	5.60759	1	0.01788
rs2367257	17	69123684	c	g	0.449	0.0088	0.124169	0.0068014	1.844e-74	++	81.8	5.50712	1	0.01894
rs2886913	17	69123691	t	c	0.4489	0.0088	0.124169	0.0068014	1.845e-74	++	81.8	5.50755	1	0.01893
rs6501441	17	69125086	a	g	0.4491	0.0093	0.124164	0.0068012	1.853e-74	++	83.6	6.11219	1	0.01343
rs8081862	17	69124420	t	c	0.4489	0.0088	0.124153	0.0068016	1.942e-74	++	81.9	5.52653	1	0.01873
rs9906164	17	69127403	c	g	0.5512	0.0089	-0.124127	0.0068011	2.03e-74	--	81.6	5.43808	1	0.0197
rs8073978	17	69126953	t	c	0.551	0.0088	-0.124124	0.0068011	2.053e-74	--	81.6	5.44213	1	0.01966
rs6501442	17	69125142	t	g	0.4487	0.0089	0.124132	0.0068017	2.065e-74	++	82.4	5.66972	1	0.01726
rs6501439	17	69124884	a	g	0.5512	0.0089	-0.124124	0.0068015	2.087e-74	--	82.8	5.79726	1	0.01605
rs9783825	17	69123014	a	g	0.551	0.0088	-0.124116	0.0068015	2.134e-74	--	82	5.56983	1	0.01827
rs80317438	8	128147111	t	c	0.9537	0.0039	-0.283089	0.0155134	2.147e-74	--	98.3	58.9809	1	1.592e-14
rs1167202552	X	51280020	t	g	0.6317	0	-0.104	0.0057	2.242e-74	-?	0	0	0	1
rs6501443	17	69125157	c	g	0.4487	0.0087	0.124063	0.0068016	2.468e-74	++	81.9	5.51477	1	0.01886
rs11868971	17	69127773	a	g	0.4489	0.0088	0.124046	0.0068011	2.523e-74	++	81.5	5.41587	1	0.01995
rs1013999	17	69121935	t	c	0.5511	0.0087	-0.124048	0.0068017	2.58e-74	--	81.9	5.53253	1	0.01867
rs2367258	17	69123741	a	g	0.551	0.0088	-0.124038	0.0068014	2.624e-74	--	82	5.54363	1	0.01855
rs2159034	17	69121755	a	c	0.5512	0.0088	-0.124033	0.0068017	2.7e-74	--	82.7	5.78795	1	0.01614
rs9783828	17	69122693	t	c	0.4493	0.0088	0.124001	0.0068015	2.914e-74	++	82.1	5.58768	1	0.01809
rs4793530	17	69125263	t	c	0.5511	0.0088	-0.123982	0.0068015	3.057e-74	--	81.8	5.49187	1	0.01911
rs13278938	8	23506972	a	g	0.4371	0.0235	0.126188	0.006923	3.132e-74	++	81.2	5.30785	1	0.02123
rs4793333	17	69124310	a	g	0.4487	0.0089	0.123888	0.0068014	3.911e-74	++	81.8	5.4843	1	0.01919
rs28641581	X	51240078	t	c	0.6305	0	-0.1056	0.0058	4.55e-74	-?	0	0	0	1
rs61193653	17	69122410	a	t	0.5502	0.0087	-0.12381	0.0068023	5.059e-74	--	81.3	5.34819	1	0.02074
rs11091729	X	51235525	t	c	0.6393	0	-0.1037	0.0057	5.866e-74	-?	0	0	0	1
rs1327303	X	51214169	t	c	0.6394	0	-0.1037	0.0057	5.866e-74	-?	0	0	0	1
rs61850063	10	51464656	c	g	0.5939	0	-0.1619	0.0089	6.081e-74	-?	0	0	0	1
rs3857883	8	128100606	a	g	0.6461	0.0022	-0.128163	0.0070502	7.615e-74	--	94.2	17.1417	1	3.469e-05
rs5945571	X	51222598	a	t	0.6392	0	-0.1036	0.0057	8.078e-74	-?	0	0	0	1
rs5945572	X	51229683	a	g	0.3604	0	0.1036	0.0057	8.078e-74	+?	0	0	0	1
rs8074361	17	69120695	a	g	0.5547	0.0088	-0.124768	0.0068657	8.509e-74	--	84.8	6.57871	1	0.01032
rs1456316	8	128100848	a	t	0.3539	0.0023	0.128087	0.0070499	9.139e-74	++	94.1	17.0897	1	3.565e-05
rs11228551	11	68954994	a	t	0.2841	0.0096	0.135544	0.0074644	1.098e-73	++	15.4	1.18208	1	0.2769
rs11994653	8	128101343	a	g	0.6459	0.0022	-0.127994	0.0070497	1.152e-73	--	94.1	16.8765	1	3.989e-05
rs9651718	11	68947543	c	g	0.2816	0.0082	0.136718	0.0075324	1.268e-73	++	0	0.983635	1	0.3213
rs4362433	17	69121597	t	g	0.5521	0.0094	-0.123451	0.0068016	1.274e-73	--	81.1	5.29701	1	0.02136
rs4278470	10	51492713	a	c	0.4108	0	0.147	0.0081	1.328e-73	+?	0	0	0	1
rs4930668	11	68980828	t	g	0.3728	0.0129	-0.12873	0.0070958	1.491e-73	--	0	0.0677618	1	0.7946
rs5945617	X	51227221	t	g	0.3605	0	0.1034	0.0057	1.531e-73	+?	0	0	0	1
rs1327302	X	51210615	a	g	0.6388	0	-0.1034	0.0057	1.531e-73	-?	0	0	0	1
rs55814684	11	68964137	t	c	0.7164	0.0126	-0.135689	0.0074809	1.593e-73	--	0	0.929119	1	0.3351
rs62529913	8	128101331	a	g	0.3541	0.0022	0.127845	0.0070495	1.679e-73	++	94	16.7746	1	4.209e-05
rs4363897	17	46815947	c	g	0.0227	0	0.7093	0.039136	2.061e-73	?+	0	0	0	1
rs1327304	X	51214176	a	c	0.639	0	-0.1033	0.0057	2.106e-73	-?	0	0	0	1
rs5945618	X	51228551	t	c	0.6391	0	-0.1033	0.0057	2.106e-73	-?	0	0	0	1
rs58498379	X	51223415	t	c	0.6391	0	-0.1033	0.0057	2.106e-73	-?	0	0	0	1
rs12223972	11	68960391	a	g	0.7154	0.0099	-0.135256	0.007464	2.176e-73	--	15.8	1.18775	1	0.2758
rs12809032	11	68957110	t	c	0.2839	0.0095	0.135208	0.0074641	2.453e-73	++	17.7	1.21465	1	0.2704
rs773982643	17	46814338	g	gt	0.0228	0	0.708668	0.0391325	2.684e-73	?+	0	0	0	1
rs1557325427	X	51226490	t	g	0.6391	0	-0.1032	0.0057	2.896e-73	-?	0	0	0	1
rs35694749	X	51225162	a	g	0.6391	0	-0.1032	0.0057	2.896e-73	-?	0	0	0	1
rs11228553	11	68960184	t	g	0.7154	0.0099	-0.135119	0.007464	3.037e-73	--	18	1.2202	1	0.2693
rs12800787	11	68959319	t	c	0.7153	0.01	-0.135112	0.007464	3.084e-73	--	17.8	1.21654	1	0.27
rs35397545	10	51491280	t	taga	0.4095	0	0.1465	0.0081	4.077e-73	+?	0	0	0	1
rs2159035	17	69121783	a	g	0.5427	0.0134	-0.122856	0.0067986	5.429e-73	--	85.4	6.86821	1	0.008774
rs6614433	X	51277134	t	c	0.632	0	-0.1048	0.0058	5.595e-73	-?	0	0	0	1
rs2384958	X	51249397	a	t	0.6382	0	-0.1048	0.0058	5.595e-73	-?	0	0	0	1
rs10896447	11	68980875	a	c	0.627	0.0131	0.128206	0.0070958	5.704e-73	++	0	0.0473721	1	0.8277
rs2041114	17	69144617	a	g	0.4485	0.0094	0.122884	0.0068013	5.737e-73	++	79.7	4.92215	1	0.02651
rs77096235	8	23539871	a	g	0.513	0.0287	-0.124023	0.0068659	6.153e-73	--	53.5	2.15178	1	0.1424
rs2843562	10	51496796	t	c	0.5872	0	-0.1461	0.0081	9.975e-73	-?	0	0	0	1
rs6614444	X	51293967	t	c	0.3669	0	0.1046	0.0058	1.045e-72	+?	0	0	0	1
rs7925434	11	69002632	a	t	0.6275	0.0129	0.127892	0.0070949	1.222e-72	++	0	0.0601133	1	0.8063
rs9899619	17	69128089	a	g	0.5496	0.0081	-0.123729	0.0068645	1.253e-72	--	81.2	5.3141	1	0.02115
rs9906588	17	69132488	a	c	0.4474	0.0096	0.122584	0.0068011	1.257e-72	++	79.7	4.92064	1	0.02654
rs6614443	X	51293965	a	g	0.6331	0	-0.1045	0.0058	1.427e-72	-?	0	0	0	1
rs56868629	8	128444786	a	g	0.0609	0.0073	0.246034	0.0136678	1.914e-72	++	97.6	40.8691	1	1.628e-10
rs12418948	11	68926522	t	c	0.2879	0.0017	0.133705	0.0074305	2.167e-72	++	0	0.94318	1	0.3315
rs12418451	11	68935419	a	g	0.288	0.0017	0.133732	0.0074321	2.177e-72	++	0	0.911798	1	0.3396
rs4255548	11	68973970	a	g	0.3731	0.0131	-0.127703	0.0070974	2.212e-72	--	0	0.0052121	1	0.9424
rs1554936400	10	51495683	cct	c	0.4115	0	0.1457	0.0081	2.434e-72	+?	0	0	0	1
rs12793009	11	68974355	t	c	0.6268	0.0132	0.127642	0.007097	2.537e-72	++	0	0.0124433	1	0.9112
rs555979426	X	51279885	t	c	0.6162	0	-0.1043	0.0058	2.659e-72	-?	0	0	0	1
rs4495900	11	68976119	t	c	0.3723	0.0127	-0.127523	0.007097	3.431e-72	--	0	0.0084419	1	0.9268
rs574287990	X	51279886	c	g	0.3832	0	0.1042	0.0058	3.629e-72	+?	0	0	0	1
rs2843566	10	51489367	t	c	0.6199	0	-0.1545	0.0086	3.655e-72	-?	0	0	0	1
rs2611492	10	51489370	c	g	0.3801	0	0.1545	0.0086	3.655e-72	+?	0	0	0	1
rs1554936786	10	51492131	a	g	0.5894	0	-0.1473	0.0082	3.769e-72	-?	0	0	0	1
rs7950547	11	68998788	t	c	0.3725	0.0123	-0.12733	0.0070936	4.809e-72	--	0	0.055646	1	0.8135
rs12156379	8	128262926	a	g	0.9834	0.0019	-0.449283	0.0250344	5.101e-72	--	92.7	13.6452	1	0.0002208
rs11591637	10	51493566	a	g	0.4093	0	0.1453	0.0081	5.927e-72	+?	0	0	0	1
rs7926098	11	68975524	t	c	0.3702	0.0151	-0.127354	0.0071042	7.314e-72	--	0	0.0533357	1	0.8174
rs76694703	8	128454284	t	c	0.9428	0.0069	-0.251821	0.0140715	1.272e-71	--	98.1	53.3481	1	2.794e-13
rs9907995	17	69128116	t	c	0.4505	0.0097	0.122796	0.0068649	1.475e-71	++	82.1	5.58095	1	0.01816
rs200470358	10	51462599	t	c	0.637	0	-0.1574	0.0088	1.506e-71	-?	0	0	0	1
rs12783102	10	51489667	t	c	0.5896	0	-0.1466	0.0082	1.748e-71	-?	0	0	0	1
rs11228501	11	68874540	t	c	0.4234	0.0122	0.123078	0.006889	2.174e-71	++	71.2	3.47112	1	0.06245
rs73407554	11	2224175	c	g	0.7982	0.0005	-0.148756	0.0083306	2.573e-71	--	0	0.571204	1	0.4498
rs7064089	X	51211390	c	g	0.3592	0	0.1035	0.0058	3.171e-71	+?	0	0	0	1
rs1854109	X	51218572	t	c	0.3588	0	0.1035	0.0058	3.171e-71	+?	0	0	0	1
rs4935090	10	51491125	a	t	0.5914	0	-0.1463	0.0082	3.368e-71	-?	0	0	0	1
rs11004221	10	51495110	a	g	0.4098	0	0.1445	0.0081	3.488e-71	+?	0	0	0	1
rs371994280	8	23510825	ct	c	0.5423	0.0059	-0.124556	0.0069843	3.876e-71	--	81.4	5.36999	1	0.02049
rs145376908	8	128100706	t	g	0.3623	0	0.1462	0.0082	4.189e-71	+?	0	0	0	1
rs1327301	X	51210057	t	c	0.3589	0	0.1034	0.0058	4.317e-71	+?	0	0	0	1
rs4043622	10	51465920	a	g	0.5907	0	-0.1604	0.009	4.751e-71	-?	0	0	0	1
rs9900302	17	69147780	a	g	0.4497	0.011	0.121125	0.0068007	5.832e-71	++	83.1	5.91195	1	0.01504
rs112786111	19	51354652	a	t	0.0569	0.006	-0.279617	0.0157029	6.276e-71	--	60	2.49913	1	0.1139
rs10825187	10	51491927	t	g	0.4088	0	0.146	0.0082	6.477e-71	+?	0	0	0	1
rs8076830	17	69131909	t	c	0.4474	0.0097	0.122199	0.0068646	6.91e-71	++	79.2	4.80076	1	0.02845
rs9906121	17	69147746	t	g	0.4496	0.0109	0.121018	0.0068001	7.538e-71	++	82.8	5.79817	1	0.01604
rs386729788	8	128088707	c	g	0.7108	0	-0.1548	0.0087	7.993e-71	-?	0	0	0	1
rs5945612	X	51211253	t	c	0.3549	0	0.1032	0.0058	7.993e-71	+?	0	0	0	1
rs201619718	22	43500212	t	g	0.4979	0	-0.1423	0.008	8.833e-71	-?	0	0	0	1
rs8081751	17	69146168	a	c	0.4496	0.0109	0.120946	0.0068002	9.122e-71	++	82.7	5.76483	1	0.01635
rs9897865	17	69147076	a	c	0.5502	0.0108	-0.120943	0.0068002	9.176e-71	--	82.7	5.76777	1	0.01632
rs2924528	11	68926593	t	c	0.6195	0.0175	-0.124598	0.0070066	9.604e-71	--	0	0.195664	1	0.6582
rs28514850	17	69146036	t	c	0.4501	0.0106	0.120871	0.0068002	1.109e-70	++	82.6	5.73436	1	0.01664
rs72853960	11	2223264	t	g	0.2014	0.0001	0.148139	0.0083367	1.217e-70	++	0	0.351226	1	0.5534
rs9901508	17	69165199	a	g	0.4491	0.0113	0.120817	0.0068	1.269e-70	++	82.4	5.67938	1	0.01717
rs8064263	17	69146830	a	t	0.4499	0.0109	0.120801	0.0068001	1.327e-70	++	82.5	5.69817	1	0.01698
rs3750970	11	68927048	t	c	0.6195	0.0174	-0.124477	0.0070071	1.333e-70	--	0	0.213448	1	0.6441
rs8081602	17	69146079	a	g	0.4502	0.0106	0.120798	0.0068002	1.343e-70	++	82.5	5.70269	1	0.01694
rs2041115	17	69146427	a	t	0.4502	0.0106	0.120798	0.0068002	1.344e-70	++	82.5	5.70269	1	0.01694
rs956218	17	69145336	a	g	0.5497	0.0105	-0.120736	0.0068002	1.584e-70	--	82.3	5.65775	1	0.01738
rs9907418	17	69165219	t	c	0.449	0.0112	0.120724	0.0068002	1.631e-70	++	82.7	5.79091	1	0.01611
rs8080184	17	69146243	a	g	0.5498	0.0106	-0.120724	0.0068002	1.632e-70	--	82.4	5.67199	1	0.01724
rs28703253	17	69145804	t	g	0.5497	0.0106	-0.120728	0.0068004	1.637e-70	--	82.4	5.66873	1	0.01727
rs9783279	11	68972992	a	c	0.3758	0.0121	-0.12589	0.0070929	1.761e-70	--	0	0.134679	1	0.7136
rs201381596	10	51482312	t	c	0.5967	0	-0.1473	0.0083	1.818e-70	-?	0	0	0	1
rs956219	17	69145707	a	g	0.5498	0.0106	-0.120661	0.0068002	1.927e-70	--	82.2	5.62803	1	0.01768
rs8069925	17	69164862	a	c	0.4491	0.0112	0.120648	0.0068002	1.99e-70	++	82.6	5.76223	1	0.01637
rs2058086	17	69151198	t	g	0.4492	0.0111	0.120628	0.0068001	2.091e-70	++	82.7	5.78615	1	0.01615
rs781932312	X	51209186	g	gtttt	0.6752	0	-0.1046	0.0059	2.513e-70	-?	0	0	0	1
rs9783280	11	68973036	a	g	0.3758	0.0121	-0.12574	0.0070929	2.565e-70	--	0	0.125934	1	0.7227
rs1564959722	10	51483510	a	at	0.445	0	0.1489	0.0084	2.633e-70	+?	0	0	0	1
rs7929203	11	68924739	t	c	0.2772	0.0011	0.132978	0.0075087	3.514e-70	++	0	0.77903	1	0.3774
rs9783278	11	68972975	a	c	0.3759	0.0121	-0.125616	0.0070931	3.534e-70	--	0	0.113093	1	0.7366
rs7220274	17	69159767	a	g	0.4489	0.0112	0.120413	0.0068001	3.663e-70	++	82.4	5.6841	1	0.01712
rs13257371	8	128099242	a	c	0.2968	0.0012	-0.134081	0.007573	3.817e-70	--	0	0.711757	1	0.3989
rs10896429	11	68876160	a	g	0.4247	0.0123	0.121872	0.0068876	4.639e-70	++	69.5	3.28148	1	0.07007
rs1395373252	X	51279678	t	c	0.6044	0	-0.1026	0.0058	5.038e-70	-?	0	0	0	1
rs9910829	17	69159577	a	g	0.449	0.0113	0.120268	0.0068012	5.641e-70	++	81.8	5.50698	1	0.01894
rs7945442	11	68972747	t	c	0.3772	0.0122	-0.125347	0.0070927	6.802e-70	--	0	0.124653	1	0.724
rs34171878	17	69127821	a	t	0.4591	0.0087	0.121289	0.0068645	7.256e-70	++	84.7	6.54571	1	0.01051
rs8182286	17	69161554	t	c	0.4492	0.0112	0.120158	0.0068005	7.273e-70	++	81.5	5.39919	1	0.02015
rs12788508	11	68873324	t	c	0.4253	0.0118	0.121645	0.0068882	8.555e-70	++	68.5	3.17073	1	0.07497
rs723338	17	69145413	a	g	0.4501	0.0107	0.120069	0.0068002	9.033e-70	++	81.4	5.38498	1	0.02031
rs56229089	17	69127852	c	g	0.5411	0.0089	-0.121164	0.0068645	1.006e-69	--	84.5	6.45308	1	0.01108
rs10486567	7	27976563	a	g	0.2437	0.0106	-0.141938	0.0080436	1.092e-69	--	66.8	3.00908	1	0.0828
rs61881056	11	68873309	t	c	0.4251	0.012	0.121496	0.0068882	1.254e-69	++	68.9	3.21571	1	0.07293
rs113339924	X	51279852	a	g	0.5874	0	-0.104	0.0059	1.525e-69	-?	0	0	0	1
rs67152137	7	27975919	c	g	0.2437	0.0106	-0.141784	0.0080438	1.542e-69	--	67.1	3.04242	1	0.08112
rs7808935	7	27977363	t	c	0.756	0.0104	0.141712	0.008044	1.821e-69	++	67.4	3.06331	1	0.08008
rs68181052	17	69165750	t	c	0.4495	0.0109	0.119792	0.0068004	1.87e-69	++	81.3	5.35903	1	0.02062
rs113472676	X	51279857	t	g	0.4128	0	0.1039	0.0059	2.058e-69	+?	0	0	0	1
rs2108534	17	69160900	a	t	0.4493	0.0111	0.11974	0.0067999	2.104e-69	++	81.1	5.30299	1	0.02129
rs72853954	11	2221765	t	c	0.7988	0.0003	-0.146777	0.0083385	2.366e-69	--	0	0.360841	1	0.548
rs6986285	8	128483935	t	c	0.3872	0.0331	-0.124241	0.0070585	2.399e-69	--	96.8	31.6153	1	1.879e-08
rs61850089	10	51475684	a	c	0.5938	0	-0.1477	0.0084	3.306e-69	-?	0	0	0	1
rs11595194	10	51489257	t	c	0.5903	0	-0.1459	0.0083	3.612e-69	-?	0	0	0	1
rs6614447	X	51316201	t	c	0.6472	0	-0.1019	0.0058	4.259e-69	-?	0	0	0	1
rs5987442	X	51323372	t	c	0.6471	0	-0.1019	0.0058	4.259e-69	-?	0	0	0	1
rs1936035	X	51316259	a	g	0.6472	0	-0.1019	0.0058	4.259e-69	-?	0	0	0	1
rs5945649	X	51338143	a	g	0.3535	0	0.1018	0.0058	5.77e-69	+?	0	0	0	1
rs4308906	X	51318466	t	c	0.6468	0	-0.1018	0.0058	5.77e-69	-?	0	0	0	1
rs1361837	X	51313064	t	c	0.3527	0	0.1018	0.0058	5.77e-69	+?	0	0	0	1
rs4457126	X	51317899	t	c	0.6472	0	-0.1018	0.0058	5.77e-69	-?	0	0	0	1
rs1298041149	X	51324642	t	c	0.6471	0	-0.1018	0.0058	5.77e-69	-?	0	0	0	1
rs1294418380	X	51337608	t	g	0.6446	0	-0.1018	0.0058	5.77e-69	-?	0	0	0	1
rs5945646	X	51322287	a	c	0.3529	0	0.1018	0.0058	5.77e-69	+?	0	0	0	1
rs12155672	8	128507024	a	g	0.5251	0.0366	0.120009	0.0068401	6.511e-69	++	96.7	30.1655	1	3.967e-08
rs5945648	X	51333192	t	g	0.6468	0	-0.1017	0.0058	7.816e-69	-?	0	0	0	1
rs5945647	X	51331485	a	g	0.6468	0	-0.1017	0.0058	7.816e-69	-?	0	0	0	1
rs5987440	X	51314397	a	g	0.3532	0	0.1017	0.0058	7.816e-69	+?	0	0	0	1
rs117576373	17	46820676	t	c	0.0344	0.006	0.312072	0.0178089	9.496e-69	++	99.2	130.487	1	3.206e-30
rs5945651	X	51343494	t	c	0.3539	0	0.1016	0.0058	1.058e-68	+?	0	0	0	1
rs980170	8	128054612	c	g	0.7039	0.0152	0.132337	0.0075568	1.152e-68	++	88.2	8.45792	1	0.003635
rs2242652	5	1280028	a	g	0.2128	0.0114	-0.15398	0.0088016	1.576e-68	--	3.2	1.03333	1	0.3094
rs4075003	11	2220304	a	g	0.2019	0.0006	0.145899	0.0083399	1.589e-68	++	0	0.557598	1	0.4552
rs7104354	11	68919489	t	c	0.2941	0.0002	0.12969	0.0074149	1.697e-68	++	0	0.838737	1	0.3598
rs12794032	11	68916901	a	g	0.2935	0.0001	0.129658	0.0074155	1.869e-68	++	0	0.825818	1	0.3635
rs1541238	X	51343635	c	g	0.646	0	-0.1014	0.0058	1.939e-68	-?	0	0	0	1
rs5945650	X	51340387	t	c	0.3539	0	0.1014	0.0058	1.939e-68	+?	0	0	0	1
rs61850070	10	51469118	a	g	0.3987	0	0.1555	0.0089	2.345e-68	+?	0	0	0	1
rs1936034	X	51342950	a	t	0.6459	0	-0.1013	0.0058	2.623e-68	-?	0	0	0	1
rs1569554195	X	51342435	t	c	0.3541	0	0.1013	0.0058	2.623e-68	+?	0	0	0	1
rs1440111082	8	128324147	t	c	0.3359	0	-0.1484	0.0085	2.95e-68	-?	0	0	0	1
rs10896439	11	68915362	t	c	0.2939	0.0003	0.129434	0.0074156	3.187e-68	++	0	0.858052	1	0.3543
rs7833011	8	128058014	a	g	0.6642	0.022	0.127436	0.0073119	5.019e-68	++	92.2	12.874	1	0.0003332
rs59647730	X	51272475	t	ta	0.4004	0	0.1028	0.0059	5.451e-68	+?	0	0	0	1
rs61850067	10	51468284	t	g	0.3859	0	0.155	0.0089	6.268e-68	+?	0	0	0	1
rs28519385	17	69160306	a	t	0.4508	0.0103	0.11952	0.0068634	6.448e-68	++	80.8	5.20842	1	0.02248
rs5987444	X	51339327	a	g	0.6457	0	-0.101	0.0058	6.484e-68	-?	0	0	0	1
rs11787440	8	128010274	t	c	0.1979	0.0128	-0.150442	0.0086414	7.002e-68	--	86.7	7.51351	1	0.006124
rs34662054	11	68908815	c	g	0.2941	0.0005	0.129091	0.007416	7.285e-68	++	0	0.882497	1	0.3475
rs4599773	8	128510424	c	g	0.5316	0.0371	0.119092	0.0068444	8.268e-68	++	96.1	25.9359	1	3.529e-07
rs386749775	11	2233797	a	g	0.1986	0	0.1705	0.0098	8.55e-68	+?	0	0	0	1
rs6981424	8	128483096	a	g	0.3816	0.0337	-0.122966	0.007068	8.583e-68	--	96.6	29.4369	1	5.777e-08
rs61850065	10	51467783	t	c	0.3918	0	0.1548	0.0089	9.28e-68	+?	0	0	0	1
rs4438347	17	69168406	t	c	0.4454	0.0129	0.119297	0.0068631	1.125e-67	++	79.6	4.90447	1	0.02679
rs796631264	11	2232696	a	c	0.1985	0	0.1703	0.0098	1.221e-67	+?	0	0	0	1
rs4239156	17	69168381	t	c	0.4454	0.0129	0.119223	0.0068631	1.358e-67	++	79.5	4.87646	1	0.02723
rs1178125342	11	2232272	a	g	0.1984	0	0.1702	0.0098	1.458e-67	+?	0	0	0	1
rs1564931092	11	2233495	caaa	c	0.1986	0	0.1702	0.0098	1.458e-67	+?	0	0	0	1
rs151146159	11	2232682	t	c	0.1985	0	0.1702	0.0098	1.458e-67	+?	0	0	0	1
rs6591373	11	68907274	c	g	0.7002	0.0017	-0.127481	0.0073441	1.709e-67	--	29.1	1.40967	1	0.2351
rs9643227	8	128496096	t	c	0.4922	0.0412	-0.118431	0.0068231	1.737e-67	--	95.8	23.5692	1	1.205e-06
rs13273995	8	128332870	t	c	0.6401	0	0.1458	0.0084	1.742e-67	+?	0	0	0	1
rs9891611	17	69169250	a	g	0.4456	0.0128	0.119077	0.0068631	1.968e-67	++	79.2	4.81877	1	0.02815
rs201057014	8	128325355	t	c	0.1271	0	0.2047	0.0118	2.062e-67	+?	0	0	0	1
rs796614829	11	2232056	a	g	0.1986	0	0.17	0.0098	2.08e-67	+?	0	0	0	1
rs9297754	8	128429262	c	g	0.7997	0.0197	-0.144455	0.0083346	2.702e-67	--	82.7	5.7739	1	0.01627
rs6501446	17	69168058	t	g	0.4453	0.013	0.118707	0.0068631	5.015e-67	++	78.6	4.68028	1	0.03051
rs750015	8	128065745	a	g	0.6631	0.0215	0.126356	0.0073109	6.305e-67	++	91.3	11.5469	1	0.0006786
rs2611493	10	51489215	t	c	0.6129	0	-0.1469	0.0085	6.389e-67	-?	0	0	0	1
rs2843567	10	51489186	c	g	0.641	0	-0.1537	0.0089	7.961e-67	-?	0	0	0	1
rs13252298	8	128095156	a	g	0.7064	0.0001	0.13072	0.0075727	9.109e-67	++	0	0.548536	1	0.4589
rs12796066	11	68918556	t	c	0.6563	0.0117	-0.122548	0.0071062	1.219e-66	--	0	0.630023	1	0.4273
rs1859964	17	69166571	t	g	0.4459	0.0127	0.118334	0.0068631	1.285e-66	++	78	4.54723	1	0.03297
rs17762342	8	128003037	a	g	0.8027	0.0124	0.150133	0.0087083	1.326e-66	++	86	7.13723	1	0.00755
rs1564930429	11	2230354	t	c	0.1995	0	0.1689	0.0098	1.458e-66	+?	0	0	0	1
rs13256658	8	128539461	t	c	0.3745	0.0255	-0.122614	0.0071216	1.971e-66	--	94.1	16.906	1	3.928e-05
rs1398357060	11	2230210	a	ag	0.8003	0	-0.1687	0.0098	2.075e-66	-?	0	0	0	1
rs12542685	8	128537583	a	t	0.6131	0.028	0.122374	0.0071095	2.131e-66	++	93.2	14.7144	1	0.0001251
rs61850071	10	51469145	c	g	0.4002	0	0.1549	0.009	2.192e-66	+?	0	0	0	1
rs10216560	8	128005689	a	g	0.8027	0.0125	0.149805	0.0087079	2.507e-66	++	86.3	7.32375	1	0.006805
rs10099074	8	127994279	a	g	0.8027	0.0124	0.149718	0.0087088	3.074e-66	++	86	7.12332	1	0.007609
rs2367263	17	69166288	a	g	0.5533	0.0122	-0.117973	0.0068633	3.215e-66	--	77.3	4.40498	1	0.03583
rs12419346	11	2217111	c	g	0.2021	0.0009	0.144234	0.0083923	3.352e-66	++	0	0.0417341	1	0.8381
rs199898426	10	51465650	t	c	0.5648	0	-0.1581	0.0092	3.452e-66	-?	0	0	0	1
rs12419367	11	2217280	a	g	0.2019	0.0011	0.144143	0.0083917	3.964e-66	++	0	0.0602642	1	0.8061
rs2003060	17	69182293	a	g	0.4531	0.0196	0.117794	0.0068621	4.785e-66	++	78.2	4.58565	1	0.03224
rs9913988	17	69180058	t	c	0.4532	0.0196	0.117777	0.0068619	4.949e-66	++	78.3	4.60268	1	0.03192
rs2886915	17	69182161	a	t	0.4532	0.0196	0.117775	0.0068618	4.952e-66	++	78.3	4.60371	1	0.0319
rs758106	17	69181003	t	c	0.4532	0.0196	0.117717	0.0068619	5.741e-66	++	78.1	4.56061	1	0.03272
rs1866343	8	23543583	a	g	0.4696	0.0297	0.116616	0.0067992	6.143e-66	++	73.5	3.77567	1	0.052
rs75982374	3	170063227	a	g	0.8451	0.0155	0.169049	0.0098581	6.482e-66	++	0	0.0999823	1	0.7519
rs116931900	17	46802314	t	g	0.0343	0.0061	0.306506	0.0178956	9.269e-66	++	99.3	141.087	1	1.54e-32
rs2367266	17	69199987	c	g	0.5448	0.0191	-0.117436	0.0068623	1.184e-65	--	76.4	4.23667	1	0.03956
rs58235267	2	63277843	c	g	0.5442	0.0245	-0.116718	0.0068218	1.26e-65	--	0	0.0385339	1	0.8444
rs6984837	8	127901649	a	g	0.6843	0.0057	-0.123849	0.0072402	1.346e-65	--	88.1	8.40749	1	0.003737
rs9650093	8	127984089	a	g	0.8009	0.0132	0.147784	0.0086413	1.432e-65	++	86.2	7.22288	1	0.007198
rs6501451	17	69193131	t	c	0.4542	0.0195	0.117351	0.0068622	1.458e-65	++	76.3	4.22111	1	0.03992
rs11786742	8	23545458	t	c	0.5289	0.0293	-0.117362	0.0068632	1.482e-65	--	71.2	3.47441	1	0.06232
rs12798031	11	68922450	t	g	0.2935	0.0002	0.126759	0.007415	1.616e-65	++	0	0.74462	1	0.3882
rs9891648	17	69184952	a	g	0.4534	0.0195	0.117283	0.0068617	1.688e-65	++	76.7	4.28753	1	0.03839
rs779870534	17	36097661	ca	c	0.4483	0	-0.1401	0.0082	1.907e-65	-?	0	0	0	1
rs1478228083	8	128320509	t	tttttg	0.142	0	0.1879	0.011	2.027e-65	+?	0	0	0	1
rs9893839	17	69172470	t	c	0.4552	0.0167	0.116041	0.0067944	2.132e-65	++	81	5.27656	1	0.02161
rs11228521	11	68915045	t	c	0.286	0.002	0.126665	0.0074235	2.814e-65	++	0	0.834161	1	0.3611
rs72853948	11	2219937	a	g	0.2051	0	0.142017	0.0083259	3.093e-65	++	0	0.499376	1	0.4798
rs453875	8	128321411	a	g	0.4171	0.0147	-0.117721	0.006908	4.068e-65	--	92.9	14.0451	1	0.0001785
rs11655744	17	69199056	t	c	0.4547	0.0194	0.116925	0.0068624	4.255e-65	++	75.9	4.14868	1	0.04167
rs143568360	8	128340489	caa	c	0.1442	0	0.1857	0.0109	4.388e-65	+?	0	0	0	1
rs199873947	8	128332387	a	g	0.8553	0	-0.1857	0.0109	4.388e-65	-?	0	0	0	1
rs1185949680	8	128340537	a	t	0.8558	0	-0.1856	0.0109	5.133e-65	-?	0	0	0	1
rs372240546	17	69121286	a	c	0.4427	0	0.1345	0.0079	5.33e-65	+?	0	0	0	1
rs1354711412	10	51529805	t	c	0.3728	0	-0.1634	0.0096	5.755e-65	-?	0	0	0	1
rs148877102	X	51279731	c	g	0.5885	0	-0.1021	0.006	6.179e-65	-?	0	0	0	1
rs200047895	10	51456627	t	tttg	0.3264	0	0.1582	0.0093	6.835e-65	+?	0	0	0	1
rs1489412570	8	128340374	a	c	0.8558	0	-0.1854	0.0109	7.022e-65	-?	0	0	0	1
rs6470510	8	128429660	t	c	0.1997	0.0206	0.141882	0.008348	8.796e-65	++	79.8	4.94339	1	0.02619
rs879719724	8	128333180	t	c	0.3678	0	-0.141	0.0083	1.008e-64	-?	0	0	0	1
rs17832285	8	128108993	a	g	0.8252	0.0147	0.156859	0.009236	1.09e-64	++	67.5	3.07548	1	0.07948
rs166900	8	128286567	t	c	0.2173	0.0097	0.138745	0.0081711	1.156e-64	++	95.8	23.5329	1	1.228e-06
rs11651501	17	69148558	a	t	0.5319	0.011	-0.115463	0.0068007	1.194e-64	--	82.2	5.62795	1	0.01768
rs11651469	17	69148519	t	g	0.4677	0.0112	0.115463	0.0068007	1.194e-64	++	82.2	5.62801	1	0.01768
rs10896438	11	68906570	t	g	0.6959	0.0009	-0.124395	0.0073308	1.396e-64	--	0	0.862359	1	0.3531
rs9899201	17	69149543	c	g	0.5322	0.0111	-0.115376	0.0068008	1.493e-64	--	82.6	5.73226	1	0.01666
rs7819102	8	128481349	t	c	0.4426	0.0388	-0.116478	0.0068692	1.719e-64	--	96.7	30.0201	1	4.276e-08
rs2924538	11	68910854	t	c	0.696	0.001	-0.124283	0.0073305	1.794e-64	--	0	0.900547	1	0.3426
rs61850088	10	51475313	c	g	0.4398	0	0.1475	0.0087	1.797e-64	+?	0	0	0	1
rs8079962	17	69172702	a	c	0.4556	0.0171	0.115149	0.0067949	2.043e-64	++	82.6	5.73517	1	0.01663
rs11774287	8	128329744	a	c	0.8593	0	-0.1879	0.0111	2.801e-64	-?	0	0	0	1
rs1555607916	17	69123107	a	g	0.5562	0	-0.1337	0.0079	2.991e-64	-?	0	0	0	1
rs879334062	17	69123106	t	c	0.4437	0	0.1337	0.0079	2.991e-64	+?	0	0	0	1
rs57194127	10	51539006	a	atttttttttt	0.656	0	-0.1438	0.0085	3.335e-64	-?	0	0	0	1
rs35024904	8	128331320	cagag	c	0.6333	0	0.1404	0.0083	3.449e-64	+?	0	0	0	1
rs1044035383	17	69127568	t	c	0.5565	0	-0.1336	0.0079	3.708e-64	-?	0	0	0	1
rs796505586	17	69127570	c	g	0.5565	0	-0.1336	0.0079	3.708e-64	-?	0	0	0	1
rs183738189	8	128327889	a	g	0.1442	0	0.186	0.011	3.856e-64	+?	0	0	0	1
rs11778977	8	128056186	t	c	0.614	0.0222	0.11889	0.0070336	4.269e-64	++	89.5	9.5115	1	0.002042
rs1040857719	8	128342067	a	aaaac	0.8553	0	-0.1859	0.011	4.499e-64	-?	0	0	0	1
rs1206133852	8	128323987	a	g	0.8551	0	-0.1842	0.0109	4.57e-64	-?	0	0	0	1
rs146059343	10	51484494	a	c	0.5178	0	-0.1504	0.0089	4.586e-64	-?	0	0	0	1
rs202040579	17	69127020	a	c	0.5561	0	-0.1335	0.0079	4.597e-64	-?	0	0	0	1
rs896415381	17	69128183	g	ga	0.5565	0	-0.1335	0.0079	4.597e-64	-?	0	0	0	1
rs111244787	17	69124474	ca	c	0.4437	0	0.1335	0.0079	4.597e-64	+?	0	0	0	1
rs1318891795	8	128341810	t	c	0.8535	0	-0.1841	0.0109	5.339e-64	-?	0	0	0	1
rs13260378	8	128488750	t	g	0.441	0.0426	-0.116145	0.0068779	5.633e-64	--	96.4	27.6753	1	1.435e-07
rs28883705	X	51279710	t	g	0.4289	0	0.1013	0.006	5.968e-64	+?	0	0	0	1
rs1557346702	X	51438171	a	g	0.3181	0	0.0996	0.0059	6.171e-64	+?	0	0	0	1
rs1557323144	X	51204495	a	t	0.6449	0	-0.0996	0.0059	6.171e-64	-?	0	0	0	1
rs11091751	X	51409935	a	g	0.3173	0	0.0996	0.0059	6.171e-64	+?	0	0	0	1
rs7712562	5	1296072	a	g	0.1531	0.0008	-0.167044	0.0098987	6.828e-64	--	0	0.163334	1	0.6861
rs10792025	11	68921211	t	c	0.3432	0.0111	0.119919	0.0071063	6.867e-64	++	0	0.544526	1	0.4606
rs6501447	17	69173098	t	c	0.4553	0.0168	0.115682	0.0068575	7.563e-64	++	80.5	5.11513	1	0.02372
rs1557346457	X	51440606	c	g	0.6819	0	-0.0995	0.0059	8.222e-64	-?	0	0	0	1
rs4986571	X	51474676	a	g	0.6818	0	-0.0995	0.0059	8.222e-64	-?	0	0	0	1
rs566668410	8	128332724	a	g	0.8553	0	-0.1855	0.011	8.33e-64	-?	0	0	0	1
rs10792026	11	68923241	a	g	0.6565	0.0113	-0.119822	0.0071063	8.643e-64	--	0	0.545447	1	0.4602
rs1817303	10	51450060	a	c	0.3486	0	0.1635	0.0097	9.532e-64	+?	0	0	0	1
rs4412159	X	51401367	t	c	0.3182	0	0.0994	0.0059	1.095e-63	+?	0	0	0	1
rs4288339	8	128067300	t	c	0.6154	0.0198	0.118454	0.0070328	1.18e-63	++	89.6	9.60341	1	0.001942
rs10956350	8	128059283	a	t	0.6171	0.0207	0.118439	0.0070345	1.306e-63	++	89.4	9.44151	1	0.002121
rs1437248052	8	128327920	c	g	0.8572	0	-0.1852	0.011	1.321e-63	-?	0	0	0	1
rs186935985	8	128332968	a	g	0.144	0	0.1852	0.011	1.321e-63	+?	0	0	0	1
rs1488570758	X	51399440	t	c	0.3186	0	0.0993	0.0059	1.458e-63	+?	0	0	0	1
rs1557346774	X	51437244	a	c	0.3186	0	0.0993	0.0059	1.458e-63	+?	0	0	0	1
rs11091752	X	51409982	c	g	0.3186	0	0.0993	0.0059	1.458e-63	+?	0	0	0	1
rs5951067	X	51468806	a	g	0.6815	0	-0.0993	0.0059	1.458e-63	-?	0	0	0	1
rs67158959	X	51436937	t	tc	0.6819	0	-0.0993	0.0059	1.458e-63	-?	0	0	0	1
rs5945669	X	51402266	t	c	0.6818	0	-0.0993	0.0059	1.458e-63	-?	0	0	0	1
rs10956349	8	128059066	t	c	0.617	0.0208	0.11837	0.0070344	1.542e-63	++	89.5	9.48775	1	0.002068
rs34774614	8	128538029	t	tg	0.662	0.0254	0.123076	0.0073141	1.543e-63	++	93.7	15.9092	1	6.645e-05
rs13271655	8	128332887	a	g	0.6632	0	0.143	0.0085	1.641e-63	+?	0	0	0	1
rs11781888	8	128329988	c	g	0.856	0	-0.185	0.011	1.796e-63	-?	0	0	0	1
rs201281308	8	128323731	t	g	0.8556	0	-0.185	0.011	1.796e-63	-?	0	0	0	1
rs1277725697	X	51410649	t	g	0.6817	0	-0.0992	0.0059	1.942e-63	-?	0	0	0	1
rs1491325936	X	51469825	a	att	0.6816	0	-0.0992	0.0059	1.942e-63	-?	0	0	0	1
rs6614492	X	51473046	t	c	0.6816	0	-0.0992	0.0059	1.942e-63	-?	0	0	0	1
rs4473816	X	51410590	a	g	0.6819	0	-0.0992	0.0059	1.942e-63	-?	0	0	0	1
rs4380715	X	51468423	t	c	0.6815	0	-0.0991	0.0059	2.584e-63	-?	0	0	0	1
rs4133112	X	51405527	a	g	0.3199	0	0.0991	0.0059	2.584e-63	+?	0	0	0	1
rs1439458	X	51469214	t	c	0.3184	0	0.0991	0.0059	2.584e-63	+?	0	0	0	1
rs2924525	11	68922244	t	c	0.3438	0.0108	0.119345	0.0071055	2.605e-63	++	0	0.517906	1	0.4717
rs11781846	8	128329834	t	c	0.1439	0	0.1847	0.011	2.845e-63	+?	0	0	0	1
rs7214479	17	69190949	t	c	0.4636	0.0239	0.114091	0.0067955	2.925e-63	++	80.9	5.22464	1	0.02227
rs58809953	8	128408061	t	c	0.0642	0.0098	0.224986	0.0134014	2.976e-63	++	98.5	65.439	1	5.994e-16
rs11386981	17	69119588	g	gt	0.4881	0	0.1376	0.0082	3.39e-63	+?	0	0	0	1
rs12543663	8	127924659	a	c	0.7105	0.0089	-0.124489	0.0074217	3.799e-63	--	89	9.07492	1	0.002591
rs75428928	8	128490155	t	c	0.5584	0.0422	0.116357	0.0069405	4.401e-63	++	96	25.162	1	5.271e-07
rs34854154	8	128540005	a	c	0.6631	0.0249	0.12258	0.0073129	4.609e-63	++	93.6	15.7075	1	7.393e-05
rs9906098	17	69186334	a	t	0.5367	0.0238	-0.113902	0.0067952	4.613e-63	--	80.4	5.09812	1	0.02395
rs11995193	8	127924137	a	g	0.2921	0.0098	0.124382	0.0074209	4.708e-63	++	89.3	9.33884	1	0.002243
rs7449190	5	1297918	t	c	0.1582	0.0052	-0.164368	0.0098125	5.581e-63	--	0	0.172328	1	0.6781
rs7928319	11	68907002	a	g	0.2921	0.0005	0.124193	0.0074162	6.038e-63	++	32.3	1.47748	1	0.2242
rs1330950319	X	51401440	a	at	0.6733	0	-0.0988	0.0059	6.081e-63	-?	0	0	0	1
rs283731	8	128281901	t	c	0.2103	0.0026	0.137789	0.0082284	6.094e-63	++	95.7	23.3377	1	1.359e-06
rs10007915	4	106065308	c	g	0.5696	0.0352	0.116254	0.006946	7.06e-63	++	0	0.896695	1	0.3437
rs6614436	X	51279669	a	g	0.5735	0	-0.1004	0.006	7.493e-63	-?	0	0	0	1
rs10090421	8	128453765	a	g	0.7452	0.0173	-0.129358	0.0077307	7.516e-63	--	25.4	1.34044	1	0.247
rs7209505	17	69203664	a	g	0.4636	0.0241	0.11477	0.0068591	7.609e-63	++	81.3	5.35776	1	0.02063
rs7679673	4	106061534	a	c	0.4292	0.0357	-0.116201	0.0069452	7.773e-63	--	0	0.874896	1	0.3496
rs57690774	X	51308457	ca	c	0.6001	0	-0.0987	0.0059	8.083e-63	-?	0	0	0	1
rs1231658470	17	69121276	g	ga	0.5566	0	-0.1338	0.008	8.618e-63	-?	0	0	0	1
rs947069172	17	69126519	t	ta	0.5559	0	-0.1338	0.008	8.618e-63	-?	0	0	0	1
rs59732923	8	128539183	t	c	0.6615	0.026	0.122317	0.0073139	8.784e-63	++	93.7	15.9859	1	6.382e-05
rs71029115	11	2225709	a	ac	0.1885	0	0.1756	0.0105	8.792e-63	+?	0	0	0	1
rs7126281	11	68910223	c	g	0.7103	0.0048	-0.123907	0.0074093	8.892e-63	--	0	0.384416	1	0.5352
rs1481216929	8	128324895	t	c	0.6335	0	0.1388	0.0083	8.928e-63	+?	0	0	0	1
rs283732	8	128281644	t	c	0.7886	0.0021	-0.137524	0.0082269	9.969e-63	--	95.6	22.7997	1	1.798e-06
rs13264091	8	128536454	t	g	0.6609	0.0263	0.122138	0.0073137	1.311e-62	++	92.6	13.4245	1	0.0002484
rs201078201	11	68911197	t	tggg	0.7133	0.0089	-0.125744	0.0075306	1.363e-62	--	0	0.337218	1	0.5614
rs2924540	11	68910579	t	c	0.6461	0.0106	-0.118394	0.0070906	1.37e-62	--	0	0.639753	1	0.4238
rs370874	8	128291366	t	c	0.778	0.0091	-0.13504	0.0080957	1.816e-62	--	96.7	30.029	1	4.256e-08
rs8076811	17	69175407	a	g	0.4635	0.0242	0.114403	0.0068594	1.889e-62	++	82	5.54841	1	0.0185
rs879312387	11	2229360	t	c	0.8086	0	-0.1651	0.0099	1.934e-62	-?	0	0	0	1
rs1243464550	8	128093856	t	ta	0.5656	0	0.1334	0.008	1.992e-62	+?	0	0	0	1
rs62063939	17	69208579	a	c	0.4652	0.0238	0.114368	0.0068595	2.06e-62	++	81.3	5.36125	1	0.02059
rs283715	8	128303557	t	c	0.2053	0.0048	0.138244	0.0082979	2.55e-62	++	95.8	24.0667	1	9.306e-07
rs10441523	8	127924563	t	c	0.7081	0.0096	-0.123543	0.0074194	2.955e-62	--	88.9	8.99539	1	0.002707
rs185852	8	128293466	a	g	0.2145	0.0109	0.135986	0.0081746	3.885e-62	++	96.1	25.8381	1	3.713e-07
rs73110464	12	53312612	t	c	0.1364	0.0134	0.161998	0.0097439	4.553e-62	++	0	0.345107	1	0.5569
rs71300231	8	128480943	a	ac	0.671	0	-0.231367	0.0139184	4.741e-62	?-	0	0	0	1
rs1014013050	22	43498826	a	t	0.4778	0	0.1346	0.0081	5.225e-62	+?	0	0	0	1
rs1984280	X	51344271	a	g	0.6257	0	-0.0947	0.0057	5.516e-62	-?	0	0	0	1
rs73110471	12	53316821	a	g	0.1364	0.0135	0.161637	0.009744	8.467e-62	++	0	0.391212	1	0.5317
rs11657593	17	69207938	c	g	0.4653	0.0237	0.113709	0.0068595	1.023e-61	++	80.4	5.09338	1	0.02402
rs5951102	X	51475161	a	g	0.6868	0	-0.0978	0.0059	1.035e-61	-?	0	0	0	1
rs5951072	X	51479213	a	t	0.3132	0	0.0978	0.0059	1.035e-61	+?	0	0	0	1
rs191037095	X	51279700	a	c	0.566	0	-0.1011	0.0061	1.078e-61	-?	0	0	0	1
rs4919743	12	53309584	a	g	0.1364	0.0134	0.161458	0.0097439	1.144e-61	++	0	0.395517	1	0.5294
rs79485992	11	68980770	t	g	0.0654	0.0119	0.224322	0.0135417	1.243e-61	++	0	0.127738	1	0.7208
rs1316906427	8	128330139	t	taa	0.6434	0	0.1391	0.0084	1.367e-61	+?	0	0	0	1
rs386798834	17	69147542	a	g	0.5568	0	-0.1308	0.0079	1.426e-61	-?	0	0	0	1
rs2190463	17	69207468	t	c	0.465	0.0239	0.113489	0.0068595	1.741e-61	++	80	5.0057	1	0.02526
rs5951074	X	51483329	c	g	0.3132	0	0.0976	0.0059	1.817e-61	+?	0	0	0	1
rs6614437	X	51279694	c	g	0.4346	0	0.1009	0.0061	1.86e-61	+?	0	0	0	1
rs148376875	3	170126707	t	g	0.1419	0.0068	-0.16993	0.0102734	1.864e-61	--	0	0.294297	1	0.5875
rs55958994	12	53301019	t	c	0.1362	0.0132	0.161197	0.0097462	1.905e-61	++	0	0.557542	1	0.4553
rs6614493	X	51482048	a	t	0.3132	0	0.0975	0.0059	2.407e-61	+?	0	0	0	1
rs1313148362	11	2227193	c	g	0.1916	0	0.1636	0.0099	2.414e-61	+?	0	0	0	1
rs1557331481	X	51279681	a	g	0.564	0	-0.1008	0.0061	2.441e-61	-?	0	0	0	1
rs71455920	11	2226789	a	c	0.1891	0	0.1652	0.01	2.634e-61	+?	0	0	0	1
rs1266390192	17	69164471	t	c	0.4426	0	0.1305	0.0079	2.679e-61	+?	0	0	0	1
rs1384772691	X	51486659	t	c	0.6869	0	-0.0974	0.0059	3.188e-61	-?	0	0	0	1
rs5951079	X	51555651	a	g	0.3143	0	0.0974	0.0059	3.188e-61	+?	0	0	0	1
rs35304108	8	128568005	a	g	0.0462	0.0192	0.333884	0.0202419	4.003e-61	++	97.8	46.5078	1	9.125e-12
rs283702	8	128299175	t	c	0.7838	0.0023	-0.134214	0.0081435	5.006e-61	--	96.7	30.2657	1	3.767e-08
rs1310422818	X	51401978	a	at	0.658	0	-0.1005	0.0061	5.511e-61	-?	0	0	0	1
rs35369929	X	51528686	a	g	0.3122	0	0.0972	0.0059	5.588e-61	+?	0	0	0	1
rs4986575	X	51519716	a	g	0.688	0	-0.0972	0.0059	5.588e-61	-?	0	0	0	1
rs5951078	X	51553273	c	g	0.6877	0	-0.0972	0.0059	5.588e-61	-?	0	0	0	1
rs4986553	X	51546795	t	c	0.6878	0	-0.0972	0.0059	5.588e-61	-?	0	0	0	1
rs12844657	X	51522728	t	c	0.3121	0	0.0972	0.0059	5.588e-61	+?	0	0	0	1
rs5991819	X	51511252	a	g	0.688	0	-0.0972	0.0059	5.588e-61	-?	0	0	0	1
rs6614498	X	51513445	t	c	0.688	0	-0.0972	0.0059	5.588e-61	-?	0	0	0	1
rs5951125	X	51514988	t	c	0.3138	0	0.0972	0.0059	5.588e-61	+?	0	0	0	1
rs11339676	X	51524206	a	at	0.3121	0	0.0972	0.0059	5.588e-61	+?	0	0	0	1
rs5951126	X	51517136	t	g	0.688	0	-0.0972	0.0059	5.588e-61	-?	0	0	0	1
rs62650858	11	2226905	t	c	0.8104	0	-0.1647	0.01	6.027e-61	-?	0	0	0	1
rs5945609	X	51202466	a	c	0.6563	0	-0.0955	0.0058	6.491e-61	-?	0	0	0	1
rs5945610	X	51202545	a	g	0.3435	0	0.0955	0.0058	6.491e-61	+?	0	0	0	1
rs438783	8	128296664	a	g	0.2102	0.0044	0.135241	0.0082167	7.2e-61	++	96.6	29.2308	1	6.425e-08
rs189742305	X	51279675	t	g	0.5669	0	-0.1004	0.0061	7.227e-61	-?	0	0	0	1
rs56300054	X	51512394	a	g	0.6883	0	-0.0971	0.0059	7.394e-61	-?	0	0	0	1
rs58313224	X	51497730	a	at	0.6878	0	-0.0971	0.0059	7.394e-61	-?	0	0	0	1
rs5951120	X	51499884	t	g	0.3121	0	0.0971	0.0059	7.394e-61	+?	0	0	0	1
rs2118951	X	51518929	t	c	0.688	0	-0.0971	0.0059	7.394e-61	-?	0	0	0	1
rs5951124	X	51514945	a	g	0.6881	0	-0.0971	0.0059	7.394e-61	-?	0	0	0	1
rs58014712	X	51563336	a	g	0.6877	0	-0.0971	0.0059	7.394e-61	-?	0	0	0	1
rs4986558	X	51509121	a	g	0.6881	0	-0.0971	0.0059	7.394e-61	-?	0	0	0	1
rs12010969	X	51524318	a	g	0.6877	0	-0.0971	0.0059	7.394e-61	-?	0	0	0	1
rs6521840	X	51509294	a	t	0.6881	0	-0.0971	0.0059	7.394e-61	-?	0	0	0	1
rs2118952	X	51503189	a	g	0.6878	0	-0.0971	0.0059	7.394e-61	-?	0	0	0	1
rs10712335	17	69164251	g	ga	0.5573	0	-0.13	0.0079	7.634e-61	-?	0	0	0	1
rs781954101	X	51409779	ca	c	0.6281	0	-0.0987	0.006	8.387e-61	-?	0	0	0	1
rs17120257	12	53303331	t	c	0.8637	0.0135	-0.160215	0.0097435	9.377e-61	--	0	0.491929	1	0.4831
rs4986579	X	51543628	a	g	0.6878	0	-0.097	0.0059	9.782e-61	-?	0	0	0	1
rs5951128	X	51519438	a	t	0.688	0	-0.097	0.0059	9.782e-61	-?	0	0	0	1
rs5951123	X	51513548	t	c	0.688	0	-0.097	0.0059	9.782e-61	-?	0	0	0	1
rs7879220	X	51545020	a	g	0.3122	0	0.097	0.0059	9.782e-61	+?	0	0	0	1
rs77903984	X	51542820	t	c	0.3121	0	0.097	0.0059	9.782e-61	+?	0	0	0	1
rs9887648	X	51523849	t	c	0.3122	0	0.097	0.0059	9.782e-61	+?	0	0	0	1
rs5991735	X	51552884	a	g	0.6877	0	-0.097	0.0059	9.782e-61	-?	0	0	0	1
rs4986576	X	51535221	t	c	0.6878	0	-0.097	0.0059	9.782e-61	-?	0	0	0	1
rs4986559	X	51538626	a	g	0.6878	0	-0.097	0.0059	9.782e-61	-?	0	0	0	1
rs1348396663	17	69160475	a	t	0.4426	0	0.1298	0.0079	1.159e-60	+?	0	0	0	1
rs2430386	2	63178111	t	c	0.4954	0.0214	0.111775	0.0068035	1.187e-60	++	0	0.0856147	1	0.7698
rs5991732	X	51499343	a	t	0.6882	0	-0.0969	0.0059	1.294e-60	-?	0	0	0	1
rs1554613301	8	128480943	a	ac	0.7556	0	-0.1478	0.009	1.326e-60	-?	0	0	0	1
rs202146899	8	128481325	a	atg	0.7556	0	-0.1478	0.009	1.326e-60	-?	0	0	0	1
rs1410999365	17	69159489	t	c	0.5578	0	-0.1297	0.0079	1.428e-60	-?	0	0	0	1
rs60743985	17	69131960	a	act	0.4417	0	0.1313	0.008	1.557e-60	+?	0	0	0	1
rs6991990	8	128545383	t	c	0.3282	0.026	-0.122752	0.0074818	1.709e-60	--	92.2	12.7665	1	0.0003529
rs1542049	X	51524591	t	c	0.3123	0	0.0968	0.0059	1.71e-60	+?	0	0	0	1
rs1439462	X	51494632	t	c	0.6878	0	-0.0968	0.0059	1.71e-60	-?	0	0	0	1
rs3910588	X	51493803	a	g	0.3122	0	0.0968	0.0059	1.71e-60	+?	0	0	0	1
rs3910587	X	51493882	t	g	0.3122	0	0.0968	0.0059	1.71e-60	+?	0	0	0	1
rs5945606	X	51191157	t	c	0.3422	0	0.0951	0.0058	2.024e-60	+?	0	0	0	1
rs5987418	X	51197213	a	t	0.658	0	-0.0951	0.0058	2.024e-60	-?	0	0	0	1
rs10896437	11	68903465	c	g	0.3174	0.0169	0.119236	0.0072728	2.088e-60	++	0	0.258279	1	0.6113
rs3063713	X	51491955	t	tctg	0.3123	0	0.0967	0.0059	2.261e-60	+?	0	0	0	1
rs7890241	X	51540233	t	c	0.3105	0	0.0967	0.0059	2.261e-60	+?	0	0	0	1
rs5987419	X	51199205	a	g	0.3431	0	0.095	0.0058	2.688e-60	+?	0	0	0	1
rs5945569	X	51193211	t	c	0.6573	0	-0.095	0.0058	2.688e-60	-?	0	0	0	1
rs11798651	X	51201595	a	g	0.6568	0	-0.095	0.0058	2.688e-60	-?	0	0	0	1
rs13265719	8	128531028	t	c	0.6601	0.0303	0.120098	0.007334	2.863e-60	++	92.2	12.8806	1	0.000332
rs1333567764	X	51490441	t	g	0.6879	0	-0.0966	0.0059	2.987e-60	-?	0	0	0	1
rs2539990	2	63170185	t	c	0.4972	0.0222	0.111389	0.0068035	3.015e-60	++	0	0.0735397	1	0.7863
rs1557322706	X	51198317	ca	c	0.6555	0	-0.0949	0.0058	3.568e-60	-?	0	0	0	1
rs5945607	X	51199708	c	g	0.3432	0	0.0949	0.0058	3.568e-60	+?	0	0	0	1
rs4907790	X	51197711	a	g	0.6569	0	-0.0949	0.0058	3.568e-60	-?	0	0	0	1
rs56257047	3	169988286	t	c	0.1708	0.0053	-0.152137	0.0093034	4.156e-60	--	0	0.0333279	1	0.8551
rs13258548	8	128496847	a	g	0.7055	0.0326	0.125075	0.0076554	5.293e-60	++	94	16.6673	1	4.454e-05
rs1308306078	X	51394654	t	g	0.6926	0	-0.098	0.006	5.717e-60	-?	0	0	0	1
rs112540087	X	51279774	a	c	0.5233	0	-0.1012	0.0062	6.819e-60	-?	0	0	0	1
rs34086519	X	51196825	t	ta	0.6583	0	-0.0946	0.0058	8.332e-60	-?	0	0	0	1
rs13258812	8	128496867	t	c	0.2941	0.0325	-0.124847	0.0076559	8.744e-60	--	93.8	16.0326	1	6.226e-05
rs373082628	X	51279794	t	c	0.4765	0	0.1011	0.0062	8.88e-60	+?	0	0	0	1
rs377735796	X	51279795	a	g	0.5235	0	-0.1011	0.0062	8.88e-60	-?	0	0	0	1
rs2539981	2	63104904	t	c	0.48	0.0184	-0.111876	0.006863	9.662e-60	--	0	0.889211	1	0.3457
rs1394106641	8	128342114	a	c	0.3455	0	-0.1369	0.0084	1.026e-59	-?	0	0	0	1
rs930788	11	68886179	t	c	0.4793	0.0234	0.111059	0.0068144	1.027e-59	++	73.5	3.76882	1	0.05222
rs1562435	8	128506457	a	g	0.6617	0.0309	0.118494	0.0072707	1.03e-59	++	93.1	14.5951	1	0.0001333
rs2710651	2	63166379	a	g	0.4984	0.0227	0.11087	0.0068042	1.084e-59	++	0	0.409793	1	0.5221
rs34561884	8	128515051	c	g	0.3378	0.0307	-0.118301	0.0072721	1.672e-59	--	93.4	15.2061	1	9.639e-05
rs2569735	19	51364269	a	g	0.1424	0.0088	-0.163285	0.0100375	1.678e-59	--	0	0.370292	1	0.5428
rs2735839	19	51364623	a	g	0.1424	0.0088	-0.163268	0.0100374	1.724e-59	--	0	0.352494	1	0.5527
rs5945605	X	51190482	t	c	0.3415	0	0.0943	0.0058	1.941e-59	+?	0	0	0	1
rs2539982	2	63111004	a	g	0.5073	0.023	0.110601	0.0068028	1.957e-59	++	0	0.452354	1	0.5012
rs113094235	12	53323144	t	c	0.8627	0.014	-0.159168	0.0098013	2.651e-59	--	0	0.36654	1	0.5449
rs201673104	X	51570367	g	ga	0.6941	0	-0.0974	0.006	2.931e-59	-?	0	0	0	1
rs12156128	8	128507191	c	g	0.663	0.0323	0.118134	0.00728	3.241e-59	++	92.6	13.4757	1	0.0002417
rs61850072	10	51469168	t	c	0.5023	0	0.1509	0.0093	3.313e-59	+?	0	0	0	1
rs61850073	10	51469179	t	c	0.4977	0	-0.1509	0.0093	3.313e-59	-?	0	0	0	1
rs35907927	8	128523285	a	g	0.3281	0.0342	-0.119611	0.0073754	3.792e-59	--	92.3	13.0282	1	0.0003068
rs67111856	8	128500547	t	c	0.643	0.0281	0.117178	0.0072261	3.891e-59	++	93.5	15.5032	1	8.237e-05
rs9901939	17	69232630	a	g	0.5343	0.0214	-0.110199	0.0067958	3.902e-59	--	77	4.34972	1	0.03701
rs10069690	5	1279790	t	c	0.2764	0.0127	-0.128581	0.0079312	4.152e-59	--	0	0.838213	1	0.3599
rs147181250	12	53268073	t	g	0.1352	0.0138	0.157968	0.0097439	4.154e-59	++	2.3	1.02355	1	0.3117
rs7950146	11	68885647	a	t	0.4799	0.0234	0.110467	0.0068145	4.251e-59	++	72.8	3.6805	1	0.05505
rs11831919	12	53272015	t	c	0.8647	0.0139	-0.157907	0.0097416	4.325e-59	--	0.3	1.00284	1	0.3166
rs80304993	3	170097606	a	g	0.2635	0.0231	-0.129621	0.0079976	4.46e-59	--	65.1	2.86526	1	0.09051
rs56207534	12	53267309	c	g	0.1352	0.0138	0.157928	0.0097445	4.508e-59	++	4.2	1.04332	1	0.307
rs35774048	8	128515210	a	t	0.662	0.0308	0.117829	0.0072718	4.764e-59	++	93.2	14.6756	1	0.0001277
rs148825294	8	128426102	t	tac	0.9558	0	-0.476262	0.0293943	4.84e-59	?-	0	0	0	1
rs10216714	8	128325478	c	g	0.6586	0	0.1361	0.0084	4.851e-59	+?	0	0	0	1
rs4919742	12	53272964	a	g	0.1353	0.0139	0.157835	0.0097416	4.873e-59	++	1.2	1.01195	1	0.3144
rs71046504	11	68926886	a	at	0.4481	0.0595	0.117576	0.0072609	5.652e-59	++	6.7	1.0723	1	0.3004
rs7927331	11	68972524	a	g	0.3622	0.0124	-0.116218	0.0071778	5.815e-59	--	0	0.0267988	1	0.87
rs73108469	12	53284849	a	g	0.8649	0.0139	-0.157714	0.0097423	6.078e-59	--	0.6	1.00558	1	0.316
rs73108429	12	53271671	a	g	0.8647	0.0139	-0.157695	0.0097416	6.157e-59	--	3	1.03116	1	0.3099
rs73108466	12	53283641	a	g	0.8649	0.014	-0.157564	0.0097418	7.692e-59	--	5.1	1.05363	1	0.3047
rs55999178	12	53284360	a	g	0.135	0.014	0.15757	0.0097423	7.727e-59	++	2.3	1.02332	1	0.3117
rs4919737	12	53270795	a	g	0.8646	0.0138	-0.157555	0.0097417	7.782e-59	--	4.8	1.05053	1	0.3054
rs55914512	12	53282274	t	g	0.135	0.014	0.157488	0.0097421	8.795e-59	++	2.8	1.02904	1	0.3104
rs4919707	12	53289648	a	g	0.865	0.014	-0.157489	0.0097427	8.92e-59	--	2.9	1.02978	1	0.3102
rs17156041	7	27975745	t	c	0.2241	0.0076	-0.134305	0.0083086	8.961e-59	--	61.9	2.6213	1	0.1054
rs737959	17	69224994	a	g	0.4663	0.0212	0.109809	0.0067948	9.524e-59	++	75.8	4.13094	1	0.04211
rs151235305	12	53282461	a	accaaccacgc	0.135	0.0139	0.157464	0.0097437	9.575e-59	++	0	0.990235	1	0.3197
rs11836041	12	53275037	a	c	0.865	0.014	-0.157403	0.0097418	1.006e-58	--	3.3	1.03383	1	0.3093
rs56095813	12	53294747	t	c	0.135	0.0141	0.157362	0.0097417	1.075e-58	++	2	1.0205	1	0.3124
rs5951087	X	51618983	a	g	0.3215	0	0.0953	0.0059	1.09e-58	+?	0	0	0	1
rs11985829	8	128409232	t	c	0.3036	0.0028	0.117921	0.0073012	1.12e-58	++	0	0.024342	1	0.876
rs7822052	8	128423728	a	t	0.0422	0	0.48265	0.0298951	1.236e-58	?+	0	0	0	1
rs1404829758	11	69002211	a	ag	0.5278	0	0.134	0.0083	1.24e-58	+?	0	0	0	1
rs5991739	X	51610969	a	g	0.3215	0	0.0952	0.0059	1.434e-58	+?	0	0	0	1
rs12353683	X	51585484	t	c	0.6783	0	-0.0952	0.0059	1.434e-58	-?	0	0	0	1
rs147005649	7	27971253	a	g	0.2243	0.0074	-0.134033	0.0083089	1.54e-58	--	63.9	2.7716	1	0.09595
rs60919030	X	51621856	a	t	0.6786	0	-0.0951	0.0059	1.887e-58	-?	0	0	0	1
rs1003361515	17	69136395	t	taa	0.4614	0	0.1273	0.0079	2.037e-58	+?	0	0	0	1
rs71277158	3	169999216	t	g	0.8284	0.0054	0.149846	0.0092999	2.079e-58	++	0	0.0646846	1	0.7992
rs73106451	12	53266739	a	c	0.1374	0.013	0.155904	0.0096768	2.134e-58	++	31.4	1.45836	1	0.2272
rs4919763	12	53279623	a	g	0.8645	0.0136	-0.15597	0.0096824	2.222e-58	--	18.4	1.22573	1	0.2682
rs8075481	17	69224196	c	g	0.4675	0.0206	0.109437	0.0067947	2.308e-58	++	74.4	3.90373	1	0.04818
rs7221399	17	69220444	t	c	0.4657	0.0212	0.109375	0.0067947	2.678e-58	++	75.4	4.06486	1	0.04378
rs10401004	17	69218756	a	t	0.4662	0.0213	0.109374	0.006795	2.708e-58	++	76	4.16685	1	0.04122
rs7004374	8	128525985	t	c	0.6588	0.0318	0.117	0.0072695	2.786e-58	++	92.2	12.7453	1	0.0003569
rs4871771	8	128029101	a	t	0.3728	0.0217	0.112844	0.0070121	2.872e-58	++	27	1.36912	1	0.242
rs17766217	8	128504497	t	c	0.6455	0.0342	0.115585	0.007183	2.928e-58	++	94	16.7431	1	4.28e-05
rs1194510867	X	51505547	ca	c	0.3376	0	0.0965	0.006	3.339e-58	+?	0	0	0	1
rs10995905	10	51463695	a	g	0.4808	0	-0.1447	0.009	3.652e-58	-?	0	0	0	1
rs3847136	8	128407190	a	g	0.3036	0.0028	0.117366	0.0073013	3.844e-58	++	0	0.0460893	1	0.83
rs141901720	X	51549886	a	at	0.6865	0	-0.0964	0.006	4.37e-58	-?	0	0	0	1
rs201426688	X	51275298	t	g	0.5268	0	-0.0996	0.0062	4.524e-58	-?	0	0	0	1
rs201474027	X	51275291	a	g	0.4715	0	0.0996	0.0062	4.524e-58	+?	0	0	0	1
rs8068231	17	69240785	a	g	0.4649	0.0221	0.110191	0.0068593	4.533e-58	++	77.7	4.4748	1	0.0344
rs1442471346	8	23522741	t	c	0.4287	0	0.1285	0.008	4.673e-58	+?	0	0	0	1
rs1414961993	8	23525358	t	c	0.5701	0	-0.1285	0.008	4.673e-58	-?	0	0	0	1
rs917280	17	69224611	a	c	0.4671	0.0208	0.109108	0.0067949	5.065e-58	++	74.6	3.93263	1	0.04736
rs6545977	2	63301164	a	g	0.52	0.0277	-0.109307	0.0068127	6.249e-58	--	0	0.67798	1	0.4103
rs8070461	17	69240872	t	g	0.5341	0.0219	-0.109998	0.0068595	7.187e-58	--	78.1	4.57191	1	0.0325
rs9902909	17	69231784	t	c	0.4657	0.0215	0.109968	0.0068589	7.528e-58	++	76.2	4.19295	1	0.04059
rs12770171	10	51549314	t	c	0.186	0	0.1619	0.0101	7.926e-58	+?	0	0	0	1
rs757136	7	27988939	t	c	0.7762	0.0075	0.133193	0.0083113	8.481e-58	++	64.5	2.81669	1	0.09329
rs6501462	17	69233134	t	c	0.466	0.0218	0.109905	0.0068593	8.882e-58	++	75.4	4.05992	1	0.04391
rs11982766	7	27983781	t	c	0.2237	0.0076	-0.133132	0.0083113	9.535e-58	--	64.8	2.8424	1	0.09181
rs5991744	X	51661058	c	g	0.3188	0	0.0945	0.0059	9.731e-58	+?	0	0	0	1
rs58821173	X	51377986	g	gtt	0.3973	0	0.0977	0.0061	9.818e-58	+?	0	0	0	1
rs9906756	17	69236044	a	g	0.4656	0.0217	0.109844	0.0068594	1.025e-57	++	75.1	4.0214	1	0.04493
rs9904099	17	69232488	a	g	0.4656	0.0217	0.109816	0.0068591	1.082e-57	++	76.4	4.24531	1	0.03936
rs2710647	2	63213970	t	c	0.4719	0.0138	-0.109922	0.0068662	1.103e-57	--	0	0.10362	1	0.7475
rs79377635	12	53276932	a	g	0.8644	0.0135	-0.154983	0.0096824	1.148e-57	--	27.4	1.3776	1	0.2405
rs7125026	11	2233617	t	c	0.7051	0.0188	-0.118561	0.0074072	1.158e-57	--	26.9	1.36878	1	0.242
rs35171461	X	51355222	ca	c	0.6569	0	-0.0928	0.0058	1.278e-57	-?	0	0	0	1
rs7112959	11	2233609	a	g	0.7052	0.0188	-0.118489	0.0074072	1.353e-57	--	26.2	1.35445	1	0.2445
rs71455921	11	2233635	a	c	0.2949	0.0188	0.118486	0.0074073	1.363e-57	++	26.3	1.35595	1	0.2442
rs67379609	11	2233630	t	c	0.7051	0.0188	-0.118486	0.0074072	1.364e-57	--	26.3	1.35626	1	0.2442
rs8067475	17	69240683	t	c	0.534	0.0223	-0.1097	0.0068598	1.462e-57	--	77.1	4.36549	1	0.03667
rs11971132	7	27985867	c	g	0.224	0.0074	-0.132907	0.0083113	1.473e-57	--	65.4	2.89363	1	0.08893
rs67186729	11	2233549	t	c	0.2946	0.0189	0.118445	0.007407	1.478e-57	++	27.4	1.37675	1	0.2407
rs11458572	X	51624517	ct	c	0.3163	0	0.0959	0.006	1.67e-57	+?	0	0	0	1
rs67798996	11	2233603	a	g	0.2946	0.019	0.118344	0.0074072	1.852e-57	++	24.6	1.32653	1	0.2494
rs11350919	17	69124481	a	t	0.4938	0	0.1294	0.0081	1.899e-57	+?	0	0	0	1
rs7109777	11	2233451	a	g	0.7054	0.0189	-0.118318	0.0074072	1.956e-57	--	25.4	1.33982	1	0.2471
rs12545487	8	128511292	a	g	0.6677	0.0315	0.117384	0.0073511	2.128e-57	++	92.2	12.8729	1	0.0003334
rs6614311	X	51279687	t	c	0.4657	0	0.0958	0.006	2.181e-57	+?	0	0	0	1
rs56273024	X	51516281	t	ta	0.6794	0	-0.0958	0.006	2.181e-57	-?	0	0	0	1
rs6614312	X	51279688	a	g	0.4657	0	0.0958	0.006	2.181e-57	+?	0	0	0	1
rs5991737	X	51572573	a	c	0.3078	0	0.0958	0.006	2.181e-57	+?	0	0	0	1
rs7109219	11	2233041	a	g	0.7054	0.019	-0.118263	0.007407	2.195e-57	--	24.1	1.317	1	0.2511
rs11043142	11	2234042	a	g	0.2946	0.0189	0.118279	0.0074081	2.199e-57	++	23.7	1.30977	1	0.2524
rs1303260369	X	51629745	a	g	0.3244	0	0.0942	0.0059	2.201e-57	+?	0	0	0	1
rs4986555	X	51611936	a	g	0.6756	0	-0.0942	0.0059	2.201e-57	-?	0	0	0	1
rs7052927	X	51625979	a	g	0.6756	0	-0.0942	0.0059	2.201e-57	-?	0	0	0	1
rs1212440961	X	51376791	a	at	0.6633	0	-0.0926	0.0058	2.222e-57	-?	0	0	0	1
rs1372105000	X	51376781	t	tttatta	0.6633	0	-0.0926	0.0058	2.222e-57	-?	0	0	0	1
rs201311040	X	51363602	t	tg	0.6559	0	-0.0926	0.0058	2.222e-57	-?	0	0	0	1
rs67746093	7	27985524	c	g	0.7761	0.0075	0.132684	0.0083114	2.271e-57	++	66.1	2.9462	1	0.08608
rs55903116	8	128510211	a	g	0.6677	0.0316	0.117321	0.0073509	2.42e-57	++	92.4	13.1152	1	0.0002929
rs7053197	X	51626142	a	g	0.6756	0	-0.0941	0.0059	2.888e-57	-?	0	0	0	1
rs5991741	X	51628824	a	g	0.317	0	0.0941	0.0059	2.888e-57	+?	0	0	0	1
rs11043147	11	2234169	c	g	0.7055	0.019	-0.118166	0.007409	2.897e-57	--	21.1	1.26751	1	0.2602
rs4919740	12	53270971	a	g	0.1365	0.0131	0.155368	0.0097417	2.904e-57	++	26.9	1.36877	1	0.242
rs5951064	X	51573682	a	g	0.3079	0	0.0956	0.006	3.72e-57	+?	0	0	0	1
rs7886851	X	51608351	a	g	0.6755	0	-0.094	0.0059	3.788e-57	-?	0	0	0	1
rs1992271	X	51609873	a	t	0.317	0	0.094	0.0059	3.788e-57	+?	0	0	0	1
rs5951066	X	51647404	a	g	0.6762	0	-0.094	0.0059	3.788e-57	-?	0	0	0	1
rs2083324	X	51605371	t	c	0.3172	0	0.094	0.0059	3.788e-57	+?	0	0	0	1
rs5991738	X	51601126	c	g	0.6831	0	-0.094	0.0059	3.788e-57	-?	0	0	0	1
rs34734596	X	51618322	t	tga	0.317	0	0.094	0.0059	3.788e-57	+?	0	0	0	1
rs11797168	X	51652840	a	g	0.6827	0	-0.094	0.0059	3.788e-57	-?	0	0	0	1
rs6521825	X	51369117	t	c	0.3429	0	0.0924	0.0058	3.859e-57	+?	0	0	0	1
rs5987445	X	51348333	a	g	0.3415	0	0.0924	0.0058	3.859e-57	+?	0	0	0	1
rs10807843	7	27992390	t	c	0.7759	0.0072	0.132434	0.0083137	3.944e-57	++	65.7	2.91642	1	0.08768
rs62113216	19	51364803	a	t	0.104	0.0005	-0.183901	0.0115513	4.582e-57	--	41	1.69609	1	0.1928
rs11043140	11	2233951	t	c	0.2946	0.0189	0.117927	0.0074079	4.664e-57	++	19.1	1.23643	1	0.2662
rs1439460	X	51573281	a	t	0.6922	0	-0.0955	0.006	4.856e-57	-?	0	0	0	1
rs7056700	X	51581376	a	g	0.317	0	0.0939	0.0059	4.966e-57	+?	0	0	0	1
rs4133299	X	51600709	t	c	0.317	0	0.0939	0.0059	4.966e-57	+?	0	0	0	1
rs6418008	X	51367234	a	g	0.6579	0	-0.0923	0.0058	5.084e-57	-?	0	0	0	1
rs5945578	X	51345138	t	g	0.3416	0	0.0923	0.0058	5.084e-57	+?	0	0	0	1
rs11091746	X	51354492	a	g	0.6575	0	-0.0923	0.0058	5.084e-57	-?	0	0	0	1
rs3955398	X	51346833	a	c	0.3415	0	0.0923	0.0058	5.084e-57	+?	0	0	0	1
rs5945581	X	51388034	a	g	0.6577	0	-0.0923	0.0058	5.084e-57	-?	0	0	0	1
rs5945662	X	51392103	t	c	0.6572	0	-0.0923	0.0058	5.084e-57	-?	0	0	0	1
rs1419039	X	51348176	a	g	0.6586	0	-0.0923	0.0058	5.084e-57	-?	0	0	0	1
rs200567730	X	51391102	a	c	0.6525	0	-0.0923	0.0058	5.084e-57	-?	0	0	0	1
rs6521832	X	51389741	a	g	0.3428	0	0.0923	0.0058	5.084e-57	+?	0	0	0	1
rs2185880	X	51372672	a	g	0.6575	0	-0.0923	0.0058	5.084e-57	-?	0	0	0	1
rs5987449	X	51388184	a	g	0.6572	0	-0.0923	0.0058	5.084e-57	-?	0	0	0	1
rs6521824	X	51355050	a	g	0.6595	0	-0.0923	0.0058	5.084e-57	-?	0	0	0	1
rs12688916	X	51354217	a	g	0.6585	0	-0.0923	0.0058	5.084e-57	-?	0	0	0	1
rs5945655	X	51365990	a	g	0.6574	0	-0.0923	0.0058	5.084e-57	-?	0	0	0	1
rs1357908476	X	51393920	t	c	0.6572	0	-0.0923	0.0058	5.084e-57	-?	0	0	0	1
rs6614455	X	51354076	t	c	0.3415	0	0.0923	0.0058	5.084e-57	+?	0	0	0	1
rs12610267	19	38744733	a	g	0.4682	0.0368	0.108514	0.0068223	5.781e-57	++	88.8	8.94624	1	0.00278
rs2924545	11	68883281	a	g	0.4552	0.0232	0.109414	0.0068795	5.903e-57	++	65.1	2.86755	1	0.09038
rs9891216	17	69242932	t	c	0.5309	0.0209	-0.109445	0.0068818	5.989e-57	--	73	3.70768	1	0.05416
rs1451633924	17	69139836	ctttttttttttt	c	0.4566	0	0.1272	0.008	6.336e-57	+?	0	0	0	1
rs7880576	X	51592979	t	g	0.317	0	0.0938	0.0059	6.51e-57	+?	0	0	0	1
rs12843252	X	51628658	a	t	0.3169	0	0.0938	0.0059	6.51e-57	+?	0	0	0	1
rs11795748	X	51628952	t	c	0.3169	0	0.0938	0.0059	6.51e-57	+?	0	0	0	1
rs1419040	X	51352035	a	g	0.6585	0	-0.0922	0.0058	6.695e-57	-?	0	0	0	1
rs6521823	X	51354758	c	g	0.6586	0	-0.0922	0.0058	6.695e-57	-?	0	0	0	1
rs6418009	X	51367304	a	g	0.6575	0	-0.0922	0.0058	6.695e-57	-?	0	0	0	1
rs1419038	X	51349200	a	g	0.6584	0	-0.0922	0.0058	6.695e-57	-?	0	0	0	1
rs11091749	X	51371505	t	c	0.3425	0	0.0922	0.0058	6.695e-57	+?	0	0	0	1
rs12689070	X	51361920	t	c	0.6579	0	-0.0922	0.0058	6.695e-57	-?	0	0	0	1
rs6614454	X	51352334	c	g	0.3416	0	0.0922	0.0058	6.695e-57	+?	0	0	0	1
rs11091747	X	51362096	a	c	0.3421	0	0.0922	0.0058	6.695e-57	+?	0	0	0	1
rs4907806	X	51388779	a	c	0.3423	0	0.0922	0.0058	6.695e-57	+?	0	0	0	1
rs7471717	X	51369542	t	g	0.3421	0	0.0922	0.0058	6.695e-57	+?	0	0	0	1
rs5987446	X	51351320	t	c	0.342	0	0.0922	0.0058	6.695e-57	+?	0	0	0	1
rs5945665	X	51394415	t	c	0.3424	0	0.0922	0.0058	6.695e-57	+?	0	0	0	1
rs5945583	X	51390271	t	c	0.6573	0	-0.0922	0.0058	6.695e-57	-?	0	0	0	1
rs4545263	X	51367838	t	g	0.3421	0	0.0922	0.0058	6.695e-57	+?	0	0	0	1
rs7474294	X	51369541	c	g	0.3421	0	0.0922	0.0058	6.695e-57	+?	0	0	0	1
rs5987447	X	51357564	a	g	0.3415	0	0.0922	0.0058	6.695e-57	+?	0	0	0	1
rs1857309	X	51358523	c	g	0.3419	0	0.0922	0.0058	6.695e-57	+?	0	0	0	1
rs7057039	X	51362611	a	g	0.658	0	-0.0922	0.0058	6.695e-57	-?	0	0	0	1
rs9916542	17	69239121	a	t	0.4667	0.021	0.109017	0.006859	6.97e-57	++	73.4	3.75889	1	0.05253
rs12976534	19	38743962	a	g	0.4686	0.0372	0.108425	0.006822	7.042e-57	++	88.8	8.9613	1	0.002758
rs66812419	8	128485345	t	c	0.2894	0.0335	-0.121949	0.0076733	7.132e-57	--	94.2	17.2924	1	3.205e-05
rs117478964	8	128167147	a	g	0.9647	0.0011	-0.277621	0.0174742	7.737e-57	--	94.8	19.0686	1	1.261e-05
rs4527381	3	87221370	t	c	0.4936	0.0178	-0.108197	0.0068114	8.085e-57	--	0	0.856107	1	0.3548
rs5951083	X	51580297	a	t	0.3171	0	0.0937	0.0059	8.531e-57	+?	0	0	0	1
rs5945656	X	51375399	a	g	0.6579	0	-0.0921	0.0058	8.814e-57	-?	0	0	0	1
rs4907804	X	51384251	t	c	0.6572	0	-0.0921	0.0058	8.814e-57	-?	0	0	0	1
rs12688960	X	51354539	a	g	0.658	0	-0.0921	0.0058	8.814e-57	-?	0	0	0	1
rs5945659	X	51387601	a	c	0.6579	0	-0.0921	0.0058	8.814e-57	-?	0	0	0	1
rs5945579	X	51359195	c	g	0.3415	0	0.0921	0.0058	8.814e-57	+?	0	0	0	1
rs1557346427	X	51440952	t	c	0.6817	0	-0.1048	0.0066	8.888e-57	-?	0	0	0	1
rs11003800	10	51489279	a	g	0.4965	0	-0.1429	0.009	9.032e-57	-?	0	0	0	1
rs13259396	8	128488711	a	g	0.6988	0.0348	0.120368	0.0075816	9.241e-57	++	94.8	19.1558	1	1.205e-05
rs1428232227	17	69167095	t	c	0.5613	0	-0.127	0.008	9.441e-57	-?	0	0	0	1
rs185757893	X	51737984	t	g	0.6876	0	-0.0936	0.0059	1.118e-56	-?	0	0	0	1
rs11091750	X	51380072	c	g	0.3427	0	0.092	0.0058	1.16e-56	+?	0	0	0	1
rs4907784	X	51391500	t	g	0.6562	0	-0.092	0.0058	1.16e-56	-?	0	0	0	1
rs6521828	X	51379367	a	g	0.3426	0	0.092	0.0058	1.16e-56	+?	0	0	0	1
rs183168504	X	51737989	c	g	0.6877	0	-0.0935	0.0059	1.464e-56	-?	0	0	0	1
rs7061919	X	51581211	t	c	0.6831	0	-0.0935	0.0059	1.464e-56	-?	0	0	0	1
rs12849646	X	51656821	a	g	0.6772	0	-0.0935	0.0059	1.464e-56	-?	0	0	0	1
rs28803305	X	51703743	c	g	0.313	0	0.0935	0.0059	1.464e-56	+?	0	0	0	1
rs7053327	X	51653910	a	t	0.6769	0	-0.0935	0.0059	1.464e-56	-?	0	0	0	1
rs1301154158	X	51394645	t	g	0.6542	0	-0.0919	0.0058	1.526e-56	-?	0	0	0	1
rs1555611486	17	69179642	cag	c	0.5586	0	-0.1267	0.008	1.715e-56	-?	0	0	0	1
rs12548153	8	128534692	t	c	0.6571	0.0231	0.115488	0.0072937	1.815e-56	++	85.1	6.70244	1	0.009628
rs12845213	X	51763617	t	c	0.3161	0	0.0934	0.0059	1.917e-56	+?	0	0	0	1
rs5991743	X	51653222	a	t	0.6842	0	-0.0934	0.0059	1.917e-56	-?	0	0	0	1
rs11795454	X	51766234	t	g	0.6878	0	-0.0934	0.0059	1.917e-56	-?	0	0	0	1
rs1452642367	11	68981066	a	t	0.6195	0	0.1298	0.0082	1.955e-56	+?	0	0	0	1
rs5987448	X	51377756	a	g	0.6577	0	-0.0918	0.0058	2.008e-56	-?	0	0	0	1
rs4907785	X	51395636	a	t	0.657	0	-0.0918	0.0058	2.008e-56	-?	0	0	0	1
rs5945627	X	51255417	c	g	0.5142	0	-0.0997	0.0063	2.079e-56	-?	0	0	0	1
rs1284668927	X	51691369	caaaaaa	c	0.6736	0	-0.0949	0.006	2.388e-56	-?	0	0	0	1
rs6614517	X	51700194	a	t	0.3159	0	0.0933	0.0059	2.509e-56	+?	0	0	0	1
rs146574640	X	51671002	t	c	0.3135	0	0.0933	0.0059	2.509e-56	+?	0	0	0	1
rs5991753	X	51685129	t	c	0.6864	0	-0.0933	0.0059	2.509e-56	-?	0	0	0	1
rs11668070	19	38748913	a	g	0.5316	0.0371	-0.107874	0.0068226	2.606e-56	--	88.7	8.88879	1	0.002869
rs5945586	X	51398629	t	c	0.3431	0	0.0917	0.0058	2.64e-56	+?	0	0	0	1
rs6984861	8	128487142	t	c	0.6997	0.0344	0.119846	0.0075816	2.756e-56	++	95	19.9815	1	7.819e-06
rs146364879	X	51736970	a	g	0.3136	0	0.0932	0.0059	3.283e-56	+?	0	0	0	1
rs12389993	X	51765995	t	c	0.3136	0	0.0932	0.0059	3.283e-56	+?	0	0	0	1
rs12851025	X	51747535	t	g	0.6864	0	-0.0932	0.0059	3.283e-56	-?	0	0	0	1
rs12856640	X	51716958	t	g	0.6863	0	-0.0932	0.0059	3.283e-56	-?	0	0	0	1
rs5991815	X	51778466	a	g	0.3135	0	0.0932	0.0059	3.283e-56	+?	0	0	0	1
rs11797967	X	51726506	t	g	0.3137	0	0.0932	0.0059	3.283e-56	+?	0	0	0	1
rs1557370138	X	51720184	a	g	0.6865	0	-0.0932	0.0059	3.283e-56	-?	0	0	0	1
rs199665549	X	51731151	g	gt	0.6863	0	-0.0932	0.0059	3.283e-56	-?	0	0	0	1
rs144061650	X	51757565	cctt	c	0.3138	0	0.0932	0.0059	3.283e-56	+?	0	0	0	1
rs7051319	X	51658389	t	c	0.6842	0	-0.0932	0.0059	3.283e-56	-?	0	0	0	1
rs12394435	X	51769119	t	c	0.3131	0	0.0932	0.0059	3.283e-56	+?	0	0	0	1
rs11797117	X	51725083	a	c	0.3136	0	0.0932	0.0059	3.283e-56	+?	0	0	0	1
rs144983284	X	51768559	c	g	0.3136	0	0.0932	0.0059	3.283e-56	+?	0	0	0	1
rs12850053	X	51711193	a	g	0.6863	0	-0.0932	0.0059	3.283e-56	-?	0	0	0	1
rs4986557	X	51694651	a	g	0.6858	0	-0.0932	0.0059	3.283e-56	-?	0	0	0	1
rs5991797	X	51739351	t	c	0.6864	0	-0.0932	0.0059	3.283e-56	-?	0	0	0	1
rs36001605	X	51769857	a	t	0.6864	0	-0.0932	0.0059	3.283e-56	-?	0	0	0	1
rs141042116	X	51770014	t	g	0.3137	0	0.0932	0.0059	3.283e-56	+?	0	0	0	1
rs147038958	X	51752008	t	c	0.3132	0	0.0932	0.0059	3.283e-56	+?	0	0	0	1
rs12389621	X	51707436	c	g	0.6864	0	-0.0932	0.0059	3.283e-56	-?	0	0	0	1
rs12832867	X	51766254	t	g	0.6864	0	-0.0932	0.0059	3.283e-56	-?	0	0	0	1
rs12391666	X	51769345	t	c	0.6864	0	-0.0932	0.0059	3.283e-56	-?	0	0	0	1
rs12852349	X	51769966	a	g	0.6863	0	-0.0932	0.0059	3.283e-56	-?	0	0	0	1
rs8100395	19	38747117	a	g	0.4683	0.0371	0.10777	0.0068224	3.295e-56	++	88.9	9.03135	1	0.002654
rs7247241	19	38747272	t	c	0.4683	0.0371	0.107769	0.0068224	3.299e-56	++	88.9	9.03058	1	0.002655
rs4802297	19	38738130	c	g	0.5318	0.0369	-0.10775	0.0068219	3.384e-56	--	89.2	9.30196	1	0.002289
rs7932023	11	68885278	a	g	0.4604	0.024	0.108545	0.0068782	4.21e-56	++	69.9	3.32084	1	0.06841
rs7472701	X	51731764	t	c	0.6863	0	-0.0931	0.0059	4.295e-56	-?	0	0	0	1
rs28803474	X	51703809	t	c	0.6864	0	-0.0931	0.0059	4.295e-56	-?	0	0	0	1
rs12845073	X	51747524	a	g	0.6864	0	-0.0931	0.0059	4.295e-56	-?	0	0	0	1
rs12840497	X	51707047	a	c	0.6864	0	-0.0931	0.0059	4.295e-56	-?	0	0	0	1
rs5991731	X	51781864	c	g	0.3137	0	0.0931	0.0059	4.295e-56	+?	0	0	0	1
rs5991798	X	51739448	t	c	0.6863	0	-0.0931	0.0059	4.295e-56	-?	0	0	0	1
rs5951112	X	51770846	t	g	0.3137	0	0.0931	0.0059	4.295e-56	+?	0	0	0	1
rs5991799	X	51739641	a	g	0.6863	0	-0.0931	0.0059	4.295e-56	-?	0	0	0	1
rs6614525	X	51783089	c	g	0.3141	0	0.0931	0.0059	4.295e-56	+?	0	0	0	1
rs5991804	X	51743053	a	t	0.6864	0	-0.0931	0.0059	4.295e-56	-?	0	0	0	1
rs201265990	X	51702407	t	tttg	0.6863	0	-0.0931	0.0059	4.295e-56	-?	0	0	0	1
rs11798798	X	51712721	c	g	0.3136	0	0.0931	0.0059	4.295e-56	+?	0	0	0	1
rs5991805	X	51745507	t	g	0.3132	0	0.0931	0.0059	4.295e-56	+?	0	0	0	1
rs5991807	X	51751076	t	c	0.3138	0	0.0931	0.0059	4.295e-56	+?	0	0	0	1
rs1281284342	X	51754668	a	g	0.6862	0	-0.0931	0.0059	4.295e-56	-?	0	0	0	1
rs5991785	X	51727864	a	g	0.6862	0	-0.0931	0.0059	4.295e-56	-?	0	0	0	1
rs141054495	X	51757945	t	ta	0.6862	0	-0.0931	0.0059	4.295e-56	-?	0	0	0	1
rs5991809	X	51752102	t	c	0.6862	0	-0.0931	0.0059	4.295e-56	-?	0	0	0	1
rs184792586	X	51763256	a	g	0.6864	0	-0.0931	0.0059	4.295e-56	-?	0	0	0	1
rs5991776	X	51723641	t	c	0.6862	0	-0.0931	0.0059	4.295e-56	-?	0	0	0	1
rs5991788	X	51734405	t	c	0.6863	0	-0.0931	0.0059	4.295e-56	-?	0	0	0	1
rs12397118	X	51704169	a	g	0.6864	0	-0.0931	0.0059	4.295e-56	-?	0	0	0	1
rs10855234	X	51767629	t	c	0.3137	0	0.0931	0.0059	4.295e-56	+?	0	0	0	1
rs5991729	X	51754246	a	g	0.3138	0	0.0931	0.0059	4.295e-56	+?	0	0	0	1
rs5991716	X	51708418	t	c	0.6864	0	-0.0931	0.0059	4.295e-56	-?	0	0	0	1
rs5991781	X	51726296	t	g	0.3138	0	0.0931	0.0059	4.295e-56	+?	0	0	0	1
rs5991765	X	51700153	a	t	0.3136	0	0.0931	0.0059	4.295e-56	+?	0	0	0	1
rs5951109	X	51759130	t	c	0.6858	0	-0.0931	0.0059	4.295e-56	-?	0	0	0	1
rs11798194	X	51759229	t	c	0.6864	0	-0.0931	0.0059	4.295e-56	-?	0	0	0	1
rs5991762	X	51697609	a	g	0.3137	0	0.0931	0.0059	4.295e-56	+?	0	0	0	1
rs5991812	X	51753494	a	c	0.3138	0	0.0931	0.0059	4.295e-56	+?	0	0	0	1
rs12837846	X	51755023	t	c	0.6862	0	-0.0931	0.0059	4.295e-56	-?	0	0	0	1
rs5991811	X	51753280	t	g	0.6862	0	-0.0931	0.0059	4.295e-56	-?	0	0	0	1
rs7471962	X	51731662	a	g	0.6863	0	-0.0931	0.0059	4.295e-56	-?	0	0	0	1
rs12862141	X	51740096	t	g	0.6863	0	-0.0931	0.0059	4.295e-56	-?	0	0	0	1
rs5951070	X	51723859	t	c	0.3138	0	0.0931	0.0059	4.295e-56	+?	0	0	0	1
rs781786577	X	51753981	a	c	0.3138	0	0.0931	0.0059	4.295e-56	+?	0	0	0	1
rs12861713	X	51740173	a	g	0.6863	0	-0.0931	0.0059	4.295e-56	-?	0	0	0	1
rs147329029	X	51761711	a	aacag	0.3136	0	0.0931	0.0059	4.295e-56	+?	0	0	0	1
rs5945668	X	51398926	a	c	0.657	0	-0.0915	0.0058	4.561e-56	-?	0	0	0	1
rs6614515	X	51695143	t	g	0.3143	0	0.093	0.0059	5.617e-56	+?	0	0	0	1
rs4986573	X	51779102	a	g	0.3141	0	0.093	0.0059	5.617e-56	+?	0	0	0	1
rs5991707	X	51630805	a	t	0.3196	0	0.093	0.0059	5.617e-56	+?	0	0	0	1
rs5991730	X	51764402	c	g	0.6859	0	-0.093	0.0059	5.617e-56	-?	0	0	0	1
rs1048437	X	51616127	a	c	0.6808	0	-0.093	0.0059	5.617e-56	-?	0	0	0	1
rs5951107	X	51747940	a	g	0.3142	0	0.093	0.0059	5.617e-56	+?	0	0	0	1
rs6614522	X	51766988	t	c	0.6862	0	-0.093	0.0059	5.617e-56	-?	0	0	0	1
rs56359320	X	51377103	t	c	0.3435	0	0.0914	0.0058	5.993e-56	+?	0	0	0	1
rs12558898	X	51397726	a	g	0.6563	0	-0.0914	0.0058	5.993e-56	-?	0	0	0	1
rs7250689	19	38753625	t	c	0.4676	0.0373	0.107527	0.0068245	6.248e-56	++	87.7	8.10126	1	0.004423
rs1557373184	X	51754118	t	g	0.6869	0	-0.0929	0.0059	7.344e-56	-?	0	0	0	1
rs5991728	X	51754117	t	g	0.6869	0	-0.0929	0.0059	7.344e-56	-?	0	0	0	1
rs5991742	X	51632257	t	c	0.68	0	-0.0929	0.0059	7.344e-56	-?	0	0	0	1
rs6521855	X	51741124	c	g	0.6856	0	-0.0929	0.0059	7.344e-56	-?	0	0	0	1
rs17023964	3	87185759	c	g	0.4847	0.0112	-0.107208	0.006809	7.435e-56	--	53.8	2.16353	1	0.1413
rs5991726	X	51752486	t	c	0.6888	0	-0.0944	0.006	8.938e-56	-?	0	0	0	1
rs5991768	X	51705385	c	g	0.3092	0	0.0944	0.006	8.938e-56	+?	0	0	0	1
rs4131729	X	51697194	t	c	0.6854	0	-0.0928	0.0059	9.599e-56	-?	0	0	0	1
rs5991783	X	51727050	t	c	0.6855	0	-0.0928	0.0059	9.599e-56	-?	0	0	0	1
rs28451337	8	128465187	t	c	0.2575	0.0017	0.122271	0.0077767	1.055e-55	++	96.7	29.9692	1	4.39e-08
rs7663401	4	106128954	t	c	0.6087	0.017	0.110582	0.0070394	1.313e-55	++	13.3	1.15398	1	0.2827
rs174776	19	51359852	t	c	0.1274	0.0194	-0.167522	0.0106744	1.665e-55	--	0	0.089965	1	0.7642
rs4803934	19	38746567	c	g	0.4679	0.0368	0.107059	0.0068223	1.703e-55	++	89.1	9.16461	1	0.002467
rs6770433	3	87184311	t	c	0.5157	0.011	0.10684	0.006809	1.742e-55	++	51.6	2.06727	1	0.1505
rs113395002	X	51783923	t	c	0.694	0	-0.0941	0.006	1.967e-55	-?	0	0	0	1
rs5991711	X	51693092	a	g	0.6914	0	-0.094	0.006	2.556e-55	-?	0	0	0	1
rs2047409	4	106137033	a	g	0.5923	0.0331	0.109953	0.0070205	2.759e-55	++	0	0.912262	1	0.3395
rs5951091	X	51648579	c	g	0.3186	0	0.0924	0.0059	2.794e-55	+?	0	0	0	1
rs4074722	X	51678989	t	c	0.6842	0	-0.0924	0.0059	2.794e-55	-?	0	0	0	1
rs200639841	X	51680443	g	ga	0.3165	0	0.0924	0.0059	2.794e-55	+?	0	0	0	1
rs2007403	4	106131210	t	c	0.5933	0.0335	0.109863	0.0070206	3.398e-55	++	0	0.820148	1	0.3651
rs4793539	17	69226267	t	c	0.4759	0.0225	0.106217	0.0067964	4.674e-55	++	66.7	3.00698	1	0.08291
rs7642887	3	87172632	t	c	0.5107	0.0131	0.106398	0.00681	5.015e-55	++	48.9	1.95738	1	0.1618
rs1379467273	X	51387252	t	c	0.6567	0	-0.0906	0.0058	5.263e-55	-?	0	0	0	1
rs1557330578	X	51275294	t	c	0.5139	0	-0.0984	0.0063	5.401e-55	-?	0	0	0	1
rs12549692	8	128121747	a	g	0.7286	0.0119	0.1206	0.0077246	5.976e-55	++	0	0.10027	1	0.7515
rs1396553663	17	69210354	t	c	0.5506	0	-0.1249	0.008	5.985e-55	-?	0	0	0	1
rs11735256	4	106138146	t	c	0.4088	0.0326	-0.109546	0.0070199	6.73e-55	--	0.8	1.00763	1	0.3155
rs1869931	8	128107136	a	g	0.7281	0.0131	0.12049	0.0077279	8.325e-55	++	0	0.349602	1	0.5543
rs62531071	8	128108056	a	t	0.2717	0.0126	-0.120412	0.0077265	9.304e-55	--	0	0.317159	1	0.5733
rs11097882	4	106142960	t	c	0.5935	0.0335	0.109348	0.00702	1.05e-54	++	0.7	1.00672	1	0.3157
rs57920287	X	51394669	t	g	0.6378	0	-0.0919	0.0059	1.055e-54	-?	0	0	0	1
rs78973553	X	51783884	a	g	0.3075	0	0.0934	0.006	1.226e-54	+?	0	0	0	1
rs5951114	X	51775644	c	g	0.6887	0	-0.0934	0.006	1.226e-54	-?	0	0	0	1
rs7837848	8	128099532	t	g	0.1802	0.0057	0.134468	0.0086397	1.277e-54	++	19.5	1.24283	1	0.2649
rs13268116	8	128114796	a	g	0.2713	0.0122	-0.12023	0.0077254	1.299e-54	--	0	0.219406	1	0.6395
rs13147502	4	106143797	a	g	0.594	0.0338	0.109237	0.0070199	1.34e-54	++	1.2	1.01183	1	0.3145
rs737956	17	69223868	a	g	0.5226	0.0214	-0.105754	0.0067967	1.368e-54	--	67.3	3.06195	1	0.08015
rs1183250141	X	51394660	t	g	0.638	0	-0.0918	0.0059	1.375e-54	-?	0	0	0	1
rs737958	17	69224654	t	g	0.5223	0.0217	-0.105648	0.006797	1.764e-54	--	65.5	2.89595	1	0.0888
rs35201318	8	128465700	a	c	0.2582	0.0023	0.120939	0.007783	1.892e-54	++	96.7	30.4933	1	3.35e-08
rs12493488	3	87209236	a	g	0.4589	0.0086	0.105769	0.0068075	1.942e-54	++	0	0.820344	1	0.3651
rs28663168	8	128100409	a	g	0.181	0.0054	0.13416	0.008637	2.073e-54	++	24.9	1.33107	1	0.2486
rs6788616	3	87205079	a	g	0.5412	0.0085	-0.105718	0.0068068	2.133e-54	--	0	0.797968	1	0.3717
rs6533183	4	106133184	t	c	0.6172	0.0213	0.110323	0.0071043	2.21e-54	++	0	0.902538	1	0.3421
rs6801665	3	87209149	t	c	0.459	0.0085	0.105701	0.0068075	2.27e-54	++	0	0.805937	1	0.3693
rs3018690	11	68882926	t	c	0.4656	0.0276	0.106807	0.0068802	2.395e-54	++	21.5	1.27376	1	0.2591
rs1456306	8	128116500	a	g	0.2708	0.0122	-0.119907	0.0077246	2.436e-54	--	0	0.224276	1	0.6358
rs60086365	3	87192091	a	g	0.4807	0.0128	-0.105691	0.0068115	2.68e-54	--	65.5	2.89486	1	0.08886
rs13260084	8	128116830	a	g	0.2708	0.0123	-0.119854	0.0077262	2.847e-54	--	0	0.214543	1	0.6432
rs9856752	3	87198389	a	g	0.4589	0.0086	0.105477	0.0068075	3.789e-54	++	0	0.772449	1	0.3795
rs2088396	3	87192778	c	g	0.4809	0.0125	-0.105513	0.0068106	3.898e-54	--	67.2	3.04636	1	0.08092
rs3019749	11	68924679	t	c	0.5718	0.036	-0.10727	0.0069249	4.029e-54	--	19.7	1.24496	1	0.2645
rs62257768	3	87182259	a	t	0.5193	0.0125	0.105486	0.0068108	4.171e-54	++	65.5	2.89753	1	0.08872
rs1391439	4	106151642	a	g	0.5939	0.0337	0.108722	0.00702	4.21e-54	++	0	0.971748	1	0.3242
rs2659124	19	51354597	a	t	0.1268	0.0201	-0.166765	0.0107684	4.274e-54	--	0	0.0192618	1	0.8896
rs6791387	3	87181148	a	g	0.4809	0.0126	-0.105412	0.0068108	4.942e-54	--	65.2	2.87573	1	0.08992
rs386798843	17	69208520	ca	c	0.5489	0	-0.1237	0.008	6.214e-54	-?	0	0	0	1
rs3744763	17	36090885	a	g	0.59	0	0.1252	0.0081	6.79e-54	+?	0	0	0	1
rs4986560	X	51539759	t	g	0.3114	0	0.102	0.0066	7.031e-54	+?	0	0	0	1
rs7480120	11	2224958	c	g	0.2941	0.0178	0.114416	0.0074131	9.618e-54	++	0	0.804447	1	0.3698
rs55669402	3	87175085	t	c	0.5152	0.0149	0.105087	0.0068124	1.097e-53	++	62.3	2.65074	1	0.1035
rs266878	19	51359114	c	g	0.8733	0.0199	0.165888	0.0107601	1.26e-53	++	0	0.10386	1	0.7472
rs200574737	X	51579295	a	at	0.3495	0	0.0925	0.006	1.265e-53	+?	0	0	0	1
rs17181170	3	87173324	a	g	0.4848	0.0151	-0.104997	0.0068138	1.413e-53	--	63.3	2.72794	1	0.09861
rs6839705	4	106144735	a	c	0.3812	0.0218	-0.109344	0.0071043	1.875e-53	--	0	0.93779	1	0.3328
rs1978203	17	69222669	t	c	0.485	0.0216	0.104585	0.0067994	2.179e-53	++	77.2	4.37694	1	0.03643
rs1058205	19	51363398	t	c	0.8284	0.0156	0.143152	0.0093129	2.549e-53	++	0	0.215168	1	0.6427
rs77678109	8	128034515	t	ta	0.8052	0.0111	0.133883	0.0087119	2.69e-53	++	90.6	10.5989	1	0.001132
rs11796974	X	51667129	a	g	0.3089	0	0.0922	0.006	2.739e-53	+?	0	0	0	1
rs9674957	17	69111098	a	g	0.3678	0.0092	-0.108639	0.0070723	2.978e-53	--	92.8	13.8792	1	0.0001949
rs73879193	3	170018499	a	g	0.8472	0.0135	0.150718	0.0098244	4.06e-53	++	0	0.0648618	1	0.799
rs1015521	4	106115450	t	g	0.3511	0.0033	-0.110771	0.0072239	4.539e-53	--	0	0.840143	1	0.3594
rs2220407	3	87198531	a	g	0.5395	0.0113	-0.104351	0.006807	4.826e-53	--	28.7	1.40289	1	0.2362
rs7725218	5	1282414	a	g	0.3576	0.0023	-0.113321	0.0073929	4.94e-53	--	0	0.0002961	1	0.9863
rs10505482	8	128125849	a	g	0.7276	0.0126	0.118382	0.0077243	5.133e-53	++	0	0.133933	1	0.7144
rs9884984	4	106143948	a	g	0.6175	0.0211	0.108873	0.0071043	5.217e-53	++	0	0.924876	1	0.3362
rs6995291	8	128132324	a	g	0.7283	0.0133	0.118459	0.0077312	5.434e-53	++	0	0.122147	1	0.7267
rs11665698	19	51354411	a	c	0.2923	0.045	-0.118335	0.0077292	6.559e-53	--	0	0.188651	1	0.664
rs13273993	8	128467220	t	c	0.2585	0.0025	0.120373	0.0078661	7.32e-53	++	96.8	31.724	1	1.777e-08
rs111290213	10	51495828	a	at	0.6301	0	-0.1391	0.0091	9.521e-53	-?	0	0	0	1
rs2047408	4	106123582	c	g	0.6489	0.0033	0.110382	0.0072235	1.023e-52	++	0	0.878225	1	0.3487
rs1046033867	11	68939916	g	gt	0.7104	0	-0.1314	0.0086	1.054e-52	-?	0	0	0	1
rs6533182	4	106124585	c	g	0.3512	0.0032	-0.110217	0.0072233	1.444e-52	--	0	0.863038	1	0.3529
rs1909122	4	106127004	t	c	0.6481	0.0028	0.110159	0.007223	1.621e-52	++	0	0.84486	1	0.358
rs7114418	11	2228709	a	g	0.712	0.0196	-0.113933	0.0074792	2.129e-52	--	0	0.807665	1	0.3688
rs34720002	8	128134117	t	c	0.2697	0.0128	-0.118778	0.0077985	2.203e-52	--	0	0.033461	1	0.8549
rs11665748	19	51354397	a	g	0.6978	0.0473	0.116363	0.0076446	2.542e-52	++	0	0.119621	1	0.7294
rs77482050	2	242139600	a	g	0.0395	0.0198	-0.380305	0.0250184	3.482e-52	--	0	0.185163	1	0.667
rs13282012	8	127906604	a	g	0.5184	0.019	-0.103196	0.0068003	5.159e-52	--	0	0.0054129	1	0.9414
rs35358635	8	127907398	a	g	0.5184	0.019	-0.103151	0.0068002	5.688e-52	--	0	0.0038974	1	0.9502
rs2220322	8	127911557	a	g	0.5205	0.018	-0.103132	0.0068002	5.943e-52	--	0	0.011548	1	0.9144
rs12389874	X	51765770	t	c	0.2911	0	0.094	0.0062	6.38e-52	+?	0	0	0	1
rs75663746	8	128058964	a	g	0.295	0.026	-0.115372	0.0076102	6.496e-52	--	89.3	9.32152	1	0.002265
rs2220321	8	127911596	a	g	0.5204	0.018	-0.103085	0.0068002	6.589e-52	--	0	0.0091659	1	0.9237
rs1253813928	5	1283755	t	c	0.2204	0	-0.1561	0.0103	6.985e-52	-?	0	0	0	1
rs9642878	8	128465268	a	g	0.1769	0.0005	-0.139241	0.0091886	7.16e-52	--	89.8	9.77446	1	0.00177
rs901592	8	127989849	a	c	0.3795	0.0183	0.105909	0.0069961	9.061e-52	++	10.2	1.11418	1	0.2912
rs1422387666	X	51492210	cgt	c	0.3814	0	0.0908	0.006	9.762e-52	+?	0	0	0	1
rs4871007	8	128068729	t	g	0.6747	0.0167	0.110441	0.0073078	1.334e-51	++	79.5	4.87041	1	0.02732
rs12419444	11	2209658	t	c	0.1841	0.0167	0.131273	0.0086875	1.379e-51	++	0	0.949751	1	0.3298
rs12418303	11	2209413	a	g	0.1845	0.017	0.131199	0.0086876	1.573e-51	++	0	0.939261	1	0.3325
rs10207640	2	173307726	a	g	0.9439	0.0062	0.237257	0.015711	1.588e-51	++	0	0.704666	1	0.4012
rs1362795801	X	51479455	ct	c	0.3334	0	0.0906	0.006	1.619e-51	+?	0	0	0	1
rs59454075	2	173301275	a	g	0.0559	0.0061	-0.237263	0.0157172	1.726e-51	--	0	0.790395	1	0.374
rs11775030	8	127911006	a	g	0.5206	0.0179	-0.102639	0.0068001	1.78e-51	--	0	0.0179937	1	0.8933
rs4405725	2	173305382	a	t	0.056	0.0062	-0.237196	0.0157158	1.806e-51	--	0	0.942275	1	0.3317
rs13410475	2	173309618	a	c	0.0559	0.0062	-0.237065	0.0157098	1.878e-51	--	0	0.682219	1	0.4088
rs4871752	8	127920586	a	g	0.5201	0.0183	-0.102636	0.0068015	1.881e-51	--	0	0.0432826	1	0.8352
rs7817717	8	127903262	t	g	0.4814	0.0191	0.102619	0.0068004	1.883e-51	++	0	2.21e-05	1	0.9962
rs9297746	8	127909361	t	c	0.482	0.0194	0.102607	0.0067997	1.89e-51	++	0	0.0158706	1	0.8997
rs4871750	8	127902003	a	g	0.5185	0.0191	-0.102573	0.0068006	2.095e-51	--	0	0.0003323	1	0.9855
rs1391441	4	106128760	a	g	0.6654	0.0044	0.110213	0.0073074	2.117e-51	++	2	1.02084	1	0.3123
rs146618443	2	173309803	t	g	0.0559	0.0061	-0.23684	0.0157093	2.315e-51	--	0	0.666858	1	0.4141
rs10187564	2	173308615	a	g	0.0559	0.0062	-0.236723	0.0157105	2.637e-51	--	0	0.670698	1	0.4128
rs7726159	5	1282319	a	c	0.3361	0.0078	-0.113123	0.0075133	3.141e-51	--	0	0.0184671	1	0.8919
rs13250823	8	128066938	a	c	0.7032	0.0256	0.113505	0.0075406	3.328e-51	++	88.3	8.56973	1	0.003418
rs1456308	8	128067513	t	c	0.7017	0.0246	0.113239	0.0075335	4.577e-51	++	89.4	9.43179	1	0.002133
rs75979419	2	173299266	t	c	0.0557	0.0061	-0.237263	0.015788	4.804e-51	--	0	0.840478	1	0.3593
rs34783892	8	23538220	a	actct	0.5288	0	-0.1187	0.0079	5.012e-51	-?	0	0	0	1
rs10207654	2	173307756	a	g	0.9441	0.0061	0.236026	0.0157091	5.05e-51	++	0	0.689827	1	0.4062
rs1574259	2	173313453	t	c	0.0555	0.006	-0.237014	0.0157755	5.101e-51	--	0	0.759745	1	0.3834
rs3762618	2	173305847	c	g	0.0558	0.0062	-0.236024	0.0157154	5.546e-51	--	0	0.865499	1	0.3522
rs1391438	4	106151843	t	c	0.3329	0.0047	-0.109753	0.0073083	5.629e-51	--	4.7	1.04984	1	0.3055
rs12052253	2	173314713	a	t	0.9445	0.006	0.236909	0.0157788	5.909e-51	++	0	0.583104	1	0.4451
rs7655890	4	106140501	t	g	0.6653	0.0044	0.109612	0.0073066	7.145e-51	++	14.2	1.16492	1	0.2804
rs7125284	11	2214640	a	t	0.8174	0.0166	-0.13036	0.00869	7.226e-51	--	0	0.876468	1	0.3492
rs143630257	17	69203691	a	atatc	0.5327	0	-0.12	0.008	7.342e-51	-?	0	0	0	1
rs202107500	8	23504834	t	c	0.4124	0	0.1199	0.008	8.863e-51	+?	0	0	0	1
rs1574256	2	173313965	c	g	0.0555	0.006	-0.236397	0.0157749	9.106e-51	--	0	0.721189	1	0.3958
rs114161133	2	173318244	t	g	0.0554	0.006	-0.23642	0.0157792	9.479e-51	--	0	0.581259	1	0.4458
rs12615596	2	173311682	a	g	0.0574	0.0069	-0.234237	0.0156387	1.022e-50	--	0	0.527265	1	0.4678
rs661724	8	128324895	t	c	0.6676	0	0.213516	0.0142557	1.029e-50	?+	0	0	0	1
rs115112210	2	173318179	t	g	0.0554	0.006	-0.236329	0.0157789	1.03e-50	--	0	0.579464	1	0.4465
rs7107385	11	2214804	a	g	0.1827	0.0165	0.130077	0.0086883	1.127e-50	++	0	0.754719	1	0.385
rs10896433	11	68888930	a	g	0.5525	0.0068	-0.102043	0.0068178	1.204e-50	--	0	0.113224	1	0.7365
rs4793528	17	69110773	a	g	0.6429	0.0102	0.107046	0.0071527	1.228e-50	++	91.6	11.9476	1	0.0005472
rs2658486	8	128328019	t	c	0.331	0	-0.213644	0.0142775	1.268e-50	?-	0	0	0	1
rs1468244911	8	128103969	t	c	0.1855	0	0.1496	0.01	1.34e-50	+?	0	0	0	1
rs12052385	2	173316217	a	g	0.9446	0.006	0.235964	0.0157774	1.426e-50	++	0	0.591014	1	0.442
rs3019781	11	68888456	t	c	0.4468	0.0072	0.10193	0.0068181	1.559e-50	++	0	0.111057	1	0.7389
rs12621278	2	173311553	a	g	0.9445	0.006	0.235861	0.0157786	1.601e-50	++	0	0.610882	1	0.4345
rs1163328117	3	170113798	g	gt	0.5659	0	0.124	0.0083	1.816e-50	+?	0	0	0	1
rs201177980	8	23504784	a	t	0.41	0	0.1195	0.008	1.879e-50	+?	0	0	0	1
rs117520198	11	2212843	a	g	0.1823	0.0163	0.129737	0.0086898	2.11e-50	++	0	0.698103	1	0.4034
rs1978204	17	69222945	a	g	0.5051	0.0228	-0.101539	0.0068026	2.216e-50	--	70.2	3.35857	1	0.06686
rs75689576	2	173300939	a	g	0.0554	0.0059	-0.235619	0.0157877	2.294e-50	--	0	0.700503	1	0.4026
rs77167534	2	173319930	t	c	0.0553	0.0059	-0.235578	0.0157863	2.336e-50	--	0	0.450788	1	0.502
rs16860419	2	173317826	c	g	0.0553	0.0059	-0.235384	0.015776	2.428e-50	--	0	0.624845	1	0.4293
rs4328484	17	69116230	a	g	0.3567	0.01	-0.106692	0.0071524	2.551e-50	--	91.5	11.705	1	0.0006233
rs16901922	8	128061786	c	g	0.7017	0.0269	0.111507	0.0074752	2.554e-50	++	90.8	10.8167	1	0.001006
rs1554506228	8	23502027	a	ac	0.5912	0	-0.1193	0.008	2.733e-50	-?	0	0	0	1
rs8064388	17	69231017	a	g	0.5056	0.0229	-0.101437	0.0068031	2.818e-50	--	70.2	3.36133	1	0.06674
rs9884296	4	106143140	t	c	0.336	0.0032	-0.108914	0.0073081	3.146e-50	--	2.1	1.02107	1	0.3123
rs79160711	2	173302006	a	g	0.9445	0.006	0.235233	0.0157864	3.25e-50	++	0	0.657294	1	0.4175
rs7221080	17	69229972	c	g	0.5058	0.0233	-0.10127	0.0068029	4.048e-50	--	69.1	3.24089	1	0.07182
rs12981216	19	38740925	t	c	0.4857	0.0418	-0.102244	0.0068698	4.253e-50	--	86.5	7.38948	1	0.006561
rs16860426	2	173319112	a	t	0.9446	0.006	0.234876	0.0157838	4.391e-50	++	0	0.535891	1	0.4641
rs201230072	17	69215899	ca	c	0.455	0	0.1175	0.0079	4.904e-50	+?	0	0	0	1
rs72853920	11	2206429	t	c	0.8124	0.0176	-0.128108	0.0086136	4.95e-50	--	0	0.466493	1	0.4946
rs116532339	2	173321791	t	g	0.9447	0.0059	0.234781	0.0157865	4.994e-50	++	0	0.402801	1	0.5256
rs78177998	19	51345264	t	c	0.9097	0.015	0.187066	0.0125783	4.998e-50	++	0	0.102258	1	0.7491
rs202001722	10	51488744	a	g	0.4024	0	-0.1472	0.0099	5.264e-50	-?	0	0	0	1
rs3884627	11	69025799	t	g	0.2988	0.0182	-0.112505	0.007569	5.649e-50	--	0	0.197264	1	0.6569
rs16860438	2	173321413	a	t	0.9448	0.0059	0.234589	0.0157865	5.981e-50	++	0	0.401496	1	0.5263
rs917278	17	69221925	t	c	0.5046	0.0231	-0.101022	0.006803	6.999e-50	--	68.7	3.19477	1	0.07387
rs141588522	17	69223768	a	actctt	0.5046	0.0224	-0.100987	0.0068027	7.486e-50	--	69	3.2248	1	0.07253
rs34582151	19	38750100	c	g	0.4858	0.0419	-0.101943	0.0068707	8.402e-50	--	86.2	7.26107	1	0.007047
rs11564708	11	2206326	c	g	0.8127	0.0174	-0.127796	0.0086136	8.507e-50	--	0	0.441173	1	0.5066
rs12853137	X	51581757	a	c	0.3165	0	0.0979	0.0066	8.919e-50	+?	0	0	0	1
rs75888567	2	173324256	a	g	0.056	0.0062	-0.233096	0.0157155	9.068e-50	--	0	0.392829	1	0.5308
rs6554754	5	1297258	t	c	0.1395	0.0071	-0.154494	0.0104175	9.331e-50	--	0	0.370587	1	0.5427
rs11650165	17	69109618	t	c	0.3565	0.0098	-0.106056	0.007153	9.849e-50	--	91.1	11.2874	1	0.0007803
rs4871749	8	127897460	t	c	0.2155	0.0005	0.121955	0.0082256	9.892e-50	++	97.9	48.4558	1	3.378e-12
rs8102476	19	38735613	t	c	0.4856	0.0416	-0.101726	0.0068688	1.264e-49	--	87.3	7.89785	1	0.004949
rs382434	8	128324147	t	c	0.305	0	-0.216283	0.0146131	1.451e-49	?-	0	0	0	1
rs60391019	17	69227363	a	aaac	0.4639	0	0.1183	0.008	1.764e-49	+?	0	0	0	1
rs56397626	19	51346522	a	g	0.9116	0.0143	0.188009	0.0127251	2.135e-49	++	0	0.0573244	1	0.8108
rs13269440	8	23506426	t	c	0.5406	0	-0.1211	0.0082	2.346e-49	-?	0	0	0	1
rs13279749	8	23507262	a	c	0.418	0	0.118	0.008	3.077e-49	+?	0	0	0	1
rs622856	8	128333180	t	c	0.3413	0	-0.208304	0.0141339	3.681e-49	?-	0	0	0	1
rs622853	8	128333181	a	g	0.3413	0	-0.208304	0.0141339	3.681e-49	?-	0	0	0	1
rs16761	11	68894991	a	g	0.4388	0.0071	-0.101307	0.0068806	4.54e-49	--	0	0.473133	1	0.4915
rs74673821	8	128447547	c	g	0.1738	0.0267	0.131028	0.0089002	4.666e-49	++	24.3	1.32155	1	0.2503
rs12622724	2	173324908	a	g	0.056	0.0062	-0.231312	0.0157157	4.901e-49	--	0	0.317507	1	0.5731
rs111805683	11	68962113	catg	c	0.3025	0	0.1265	0.0086	5.618e-49	+?	0	0	0	1
rs57889831	8	128445986	t	c	0.8262	0.0251	-0.131013	0.0089099	6.059e-49	--	36.1	1.56551	1	0.2109
rs74792774	8	128447466	t	c	0.1731	0.0259	0.131833	0.0089675	6.335e-49	++	32.6	1.48444	1	0.2231
rs12613307	2	173325244	t	g	0.944	0.0062	0.231002	0.0157158	6.567e-49	++	0	0.305103	1	0.5807
rs74651796	3	170129608	g	gt	0.7694	0.0146	0.122684	0.0083507	7.317e-49	++	81.7	5.45188	1	0.01955
rs202058732	3	87135322	g	gt	0.9334	0.0115	-0.198717	0.0135313	7.954e-49	--	0	0.0359732	1	0.8496
rs62530988	8	127899425	c	g	0.1308	0.0125	0.146289	0.0099665	8.918e-49	++	96.4	27.9714	1	1.231e-07
rs6614508	X	51616151	a	t	0.2913	0	0.091	0.0062	8.995e-49	+?	0	0	0	1
rs28661658	8	128437055	t	c	0.8257	0.0253	-0.129681	0.0088448	1.131e-48	--	25.8	1.34727	1	0.2458
rs150160645	7	27962103	a	g	0.2117	0.0091	-0.124073	0.0084745	1.545e-48	--	78.6	4.68072	1	0.0305
rs78718649	3	87138882	t	g	0.9353	0.0107	-0.199148	0.0136046	1.601e-48	--	0	0.0392529	1	0.8429
rs74461567	2	173327823	t	c	0.0553	0.0059	-0.231012	0.015786	1.706e-48	--	0	0.297767	1	0.5853
rs1190181760	8	128015092	t	c	0.6973	0	0.1273	0.0087	1.751e-48	+?	0	0	0	1
rs36013412	11	68927654	ct	c	0.6047	0	-0.1229	0.0084	1.783e-48	-?	0	0	0	1
rs8077906	17	69112233	a	g	0.351	0.0099	-0.104758	0.0071614	1.857e-48	--	92.6	13.5447	1	0.0002329
rs78269931	3	87140314	a	c	0.0647	0.0107	0.198973	0.0136047	1.936e-48	++	0	0.0377211	1	0.846
rs200999583	3	87144073	a	c	0.0646	0.0107	0.199135	0.0136233	2.182e-48	++	0	0.0148647	1	0.903
rs199709220	3	87143378	a	t	0.9356	0.0106	-0.199962	0.0136802	2.189e-48	--	0	0.0505688	1	0.8221
rs202078105	3	87144074	t	g	0.9354	0.0107	-0.199073	0.0136217	2.272e-48	--	0	0.0173238	1	0.8953
rs9297756	8	128440167	a	c	0.174	0.0253	0.12925	0.0088448	2.315e-48	++	29.3	1.41511	1	0.2342
rs76668454	3	87126428	t	c	0.9356	0.0106	-0.199877	0.0136814	2.448e-48	--	0	0.0568345	1	0.8116
rs146329832	3	87144215	t	g	0.9353	0.0107	-0.198643	0.0136047	2.764e-48	--	0	0.0335361	1	0.8547
rs4872174	8	23525211	t	c	0.6415	0.0468	-0.103871	0.0071151	2.863e-48	--	67.8	3.1077	1	0.07792
rs11448589	8	128026938	t	ta	0.6989	0	0.127	0.0087	2.905e-48	+?	0	0	0	1
rs148273372	3	87139232	ctt	c	0.9353	0.0107	-0.198562	0.0136047	3.016e-48	--	0	0.0324344	1	0.8571
rs149578880	3	87146497	a	g	0.0647	0.0107	0.19856	0.0136047	3.021e-48	++	0	0.032536	1	0.8569
rs146968478	3	87145072	a	g	0.0647	0.0107	0.198525	0.0136059	3.2e-48	++	0	0.0346376	1	0.8524
rs17689987	12	53275746	t	c	0.8409	0.0103	-0.133455	0.0091467	3.231e-48	--	31.8	1.46675	1	0.2259
rs1412410225	8	128026317	t	c	0.6988	0	0.1269	0.0087	3.438e-48	+?	0	0	0	1
rs143351723	3	87142064	c	g	0.9353	0.0107	-0.198397	0.0136047	3.602e-48	--	0	0.0304726	1	0.8614
rs141749915	3	87145057	t	c	0.9353	0.0107	-0.19836	0.0136059	3.821e-48	--	0	0.0325797	1	0.8568
rs6799422	3	87143018	a	t	0.0647	0.0107	0.198314	0.0136047	3.939e-48	++	0	0.029539	1	0.8635
rs75219487	3	87147922	a	t	0.0647	0.0107	0.198314	0.0136046	3.939e-48	++	0	0.0295586	1	0.8635
rs185058905	3	87146588	t	c	0.0647	0.0107	0.198314	0.0136047	3.94e-48	++	0	0.0295681	1	0.8635
rs17023900	3	87134800	a	g	0.9352	0.0107	-0.19831	0.0136057	4.02e-48	--	0	0.029799	1	0.8629
rs75236700	12	53276938	a	g	0.8409	0.0103	-0.133308	0.0091468	4.089e-48	--	32.9	1.48935	1	0.2223
rs1487236	8	128049005	a	g	0.4419	0.0186	-0.0995346	0.0068304	4.211e-48	--	80.3	5.06641	1	0.02439
rs139828754	12	53275537	ca	c	0.841	0.0103	-0.133294	0.0091472	4.225e-48	--	34.5	1.52647	1	0.2166
rs145595533	3	87147364	c	g	0.0647	0.0107	0.198231	0.0136047	4.305e-48	++	0	0.0286103	1	0.8657
rs16860513	2	173342367	a	t	0.0542	0.0056	-0.232326	0.0159466	4.42e-48	--	0	0.478253	1	0.4892
rs192127563	2	242155985	a	g	0.0395	0.0198	-0.367972	0.0252585	4.472e-48	--	0	0.150476	1	0.6981
rs11831942	12	53272113	t	g	0.8401	0.0097	-0.132354	0.0090856	4.526e-48	--	40.9	1.69321	1	0.1932
rs73108447	12	53275614	a	g	0.1591	0.0103	0.133241	0.0091467	4.554e-48	++	33.5	1.50311	1	0.2202
rs7398573	12	53276029	a	g	0.8409	0.0103	-0.133239	0.0091467	4.564e-48	--	33.4	1.50261	1	0.2203
rs73108453	12	53276900	a	g	0.8409	0.0103	-0.133237	0.0091468	4.583e-48	--	33.4	1.50163	1	0.2204
rs7302252	12	53274805	t	g	0.1591	0.0103	0.133172	0.0091467	5.08e-48	++	34.1	1.51655	1	0.2181
rs902773	12	53273779	a	g	0.8409	0.0103	-0.13317	0.0091466	5.082e-48	--	35.9	1.55889	1	0.2118
rs142565114	2	242158418	t	ttc	0.0396	0.0198	-0.372597	0.0255913	5.084e-48	--	0	0.478712	1	0.489
rs7301750	12	53274727	a	g	0.8409	0.0103	-0.133171	0.0091467	5.087e-48	--	34	1.51618	1	0.2182
rs7301912	12	53274768	c	g	0.8409	0.0103	-0.133166	0.0091467	5.133e-48	--	33.9	1.51398	1	0.2185
rs902774	12	53273904	a	g	0.1591	0.0103	0.133132	0.0091451	5.222e-48	++	38.6	1.62857	1	0.2019
rs902772	12	53273773	c	g	0.8409	0.0103	-0.133098	0.0091466	5.699e-48	--	36.4	1.57109	1	0.21
rs17023902	3	87135629	c	g	0.0647	0.0107	0.197969	0.013606	5.831e-48	++	0	0.026653	1	0.8703
rs1480027174	8	128023386	a	g	0.301	0	-0.1265	0.0087	6.737e-48	-?	0	0	0	1
rs78610930	3	87154874	t	c	0.9352	0.0107	-0.197492	0.0136047	9.531e-48	--	0	0.0206674	1	0.8857
rs79603145	7	27953364	cctt	c	0.7886	0.0093	0.123579	0.0085368	1.715e-47	++	79.1	4.77429	1	0.02889
rs192240291	3	87144032	t	c	0.061	0.0093	0.203258	0.0140535	2.071e-47	++	0	0.100049	1	0.7518
rs73108440	12	53273208	a	g	0.8401	0.0097	-0.131345	0.0090856	2.287e-47	--	46.7	1.87772	1	0.1706
rs199514560	17	69232148	t	g	0.47	0	0.1142	0.0079	2.308e-47	+?	0	0	0	1
rs370595232	3	87144040	t	c	0.939	0.0094	-0.203302	0.0140648	2.341e-47	--	0	0.0966338	1	0.7559
rs143745027	3	87144017	a	g	0.939	0.0093	-0.203071	0.0140504	2.401e-47	--	0	0.118095	1	0.7311
rs79340821	2	242247627	t	c	0.9604	0.0199	0.362873	0.0251128	2.518e-47	++	0	0.0848023	1	0.7709
rs738272	22	43501819	t	g	0.0707	0.004	-0.203337	0.0140721	2.519e-47	--	0	0.911533	1	0.3397
rs139263101	3	87144004	t	c	0.061	0.0093	0.202945	0.0140475	2.618e-47	++	0	0.110461	1	0.7396
rs2659051	19	51345568	c	g	0.1878	0.0293	-0.130264	0.0090199	2.82e-47	--	0	0.868802	1	0.3513
rs143321112	2	242220761	t	c	0.0396	0.0199	-0.362946	0.025138	2.978e-47	--	0	0.0829289	1	0.7734
rs11993627	8	128431385	t	c	0.134	0.0041	-0.14926	0.0103523	3.985e-47	--	70.3	3.36932	1	0.06642
rs2040668	7	27958773	t	g	0.7861	0.0081	0.122101	0.0084724	4.372e-47	++	80.5	5.13133	1	0.0235
rs137890042	8	128512359	a	g	0.9714	0.0142	-0.351051	0.0243597	4.403e-47	--	0	0.824615	1	0.3638
rs79123511	3	87215648	a	g	0.063	0.0072	0.196449	0.0136333	4.513e-47	++	0	0.448591	1	0.503
rs181525790	8	128326947	t	c	0.7798	0	-0.228791	0.0158866	5.063e-47	?-	0	0	0	1
rs17746508	12	53273085	a	c	0.84	0.0096	-0.130819	0.0090856	5.29e-47	--	49.1	1.96323	1	0.1612
rs34585331	8	128323731	t	g	0.7796	0	-0.228348	0.0158731	6.35e-47	?-	0	0	0	1
rs59758024	3	170119352	a	t	0.5485	0.0094	-0.0989087	0.0068764	6.549e-47	--	0	0.102467	1	0.7489
rs6980979	8	128298211	t	c	0.7453	0.0056	0.113391	0.0078856	6.962e-47	++	96.3	27.3669	1	1.683e-07
rs78525152	3	87157503	a	g	0.0627	0.0099	0.197774	0.0137565	7.233e-47	++	0	0.0126045	1	0.9106
rs151184050	8	128326801	a	c	0.7796	0	-0.228009	0.0158758	8.954e-47	?-	0	0	0	1
rs199904869	8	128328043	t	c	0.2196	0	0.228267	0.015895	9.1e-47	?+	0	0	0	1
rs78267036	3	87154582	a	g	0.9372	0.01	-0.197576	0.0137581	9.139e-47	--	0	0.0162791	1	0.8985
rs202133375	8	128326945	a	g	0.7798	0	-0.228148	0.0158882	9.278e-47	?-	0	0	0	1
rs41401348	3	87170956	t	g	0.0629	0.0101	0.197566	0.0137589	9.344e-47	++	0	0.0068405	1	0.9341
rs11228506	11	68889182	a	g	0.4442	0.0042	0.0978624	0.006819	1.042e-46	++	0	0.260916	1	0.6095
rs16860515	2	173342416	t	c	0.0522	0.0048	-0.232873	0.0162285	1.071e-46	--	0	0.549374	1	0.4586
rs138105578	8	128327419	a	g	0.7798	0	-0.227846	0.0158825	1.133e-46	?-	0	0	0	1
rs140846233	8	128327457	t	c	0.2195	0	0.228044	0.0158984	1.164e-46	?+	0	0	0	1
rs116881722	8	128330510	t	g	0.7798	0	-0.227908	0.0158901	1.182e-46	?-	0	0	0	1
rs146529058	8	128331510	a	g	0.2204	0	0.227749	0.0158794	1.188e-46	?+	0	0	0	1
rs74783204	2	242285151	a	t	0.0397	0.0199	-0.361167	0.0251895	1.266e-46	--	0	0.0690311	1	0.7928
rs9636257	2	173344128	a	g	0.0521	0.0049	-0.231805	0.0161677	1.276e-46	--	0	0.6469	1	0.4212
rs60497658	8	128341810	t	c	0.7802	0	-0.228023	0.0159068	1.324e-46	?-	0	0	0	1
rs116154780	2	242286374	t	c	0.0399	0.0199	-0.367566	0.0256494	1.413e-46	--	0	0.367062	1	0.5446
rs73179053	22	43501620	t	c	0.929	0.004	0.20061	0.0140003	1.442e-46	++	0	0.817864	1	0.3658
rs115771422	2	242307824	a	g	0.0397	0.0199	-0.360576	0.0251672	1.48e-46	--	0	0.0540374	1	0.8162
rs79968675	3	87171934	a	g	0.9364	0.0074	-0.194292	0.0135615	1.491e-46	--	0	0.34095	1	0.5593
rs72712338	8	128340537	a	t	0.7803	0	-0.227842	0.0159048	1.519e-46	?-	0	0	0	1
rs200496470	8	128323987	a	g	0.7792	0	-0.227262	0.0158651	1.535e-46	?-	0	0	0	1
rs16902103	8	128340374	a	c	0.7803	0	-0.227818	0.0159046	1.549e-46	?-	0	0	0	1
rs9836404	3	87172005	a	g	0.0635	0.0074	0.194262	0.0135626	1.564e-46	++	0	0.346197	1	0.5563
rs55867175	2	173340209	a	c	0.9478	0.0048	0.231445	0.0161597	1.586e-46	++	0	0.480765	1	0.4881
rs117510207	8	128330372	a	g	0.7792	0	-0.227263	0.0158739	1.719e-46	?-	0	0	0	1
rs116108611	2	173331076	a	g	0.052	0.0046	-0.232107	0.0162208	1.917e-46	--	0	0.611563	1	0.4342
rs71298165	8	127884215	g	gggagact	0.442	0.0207	-0.0991221	0.0069325	2.244e-46	--	94.2	17.2944	1	3.201e-05
rs16860478	2	173334716	t	g	0.9479	0.0047	0.231939	0.0162284	2.449e-46	++	0	0.504763	1	0.4774
rs79308483	3	87204175	t	c	0.937	0.0073	-0.194895	0.0136373	2.479e-46	--	0	0.33335	1	0.5637
rs374139961	17	69223909	a	g	0.4646	0	0.1129	0.0079	2.485e-46	+?	0	0	0	1
rs75735964	3	87212192	a	g	0.937	0.0072	-0.194704	0.0136333	2.855e-46	--	0	0.36507	1	0.5457
rs17023943	3	87171610	c	g	0.9354	0.0078	-0.192633	0.0134948	3.155e-46	--	0	0.293052	1	0.5883
rs76998658	3	87199702	t	c	0.9371	0.0073	-0.194755	0.0136447	3.208e-46	--	0	0.412374	1	0.5208
rs77401923	3	87174239	a	t	0.063	0.0072	0.194567	0.0136333	3.297e-46	++	0	0.354226	1	0.5517
rs35855425	8	127884408	t	tc	0.4357	0.0154	-0.0998668	0.007002	3.745e-46	--	93.2	14.709	1	0.0001254
rs76277717	3	87201316	t	c	0.937	0.0074	-0.194514	0.0136447	4.13e-46	--	0	0.401434	1	0.5263
rs79088356	3	87203963	c	g	0.0629	0.0073	0.194433	0.0136447	4.5e-46	++	0	0.398068	1	0.5281
rs74942222	3	87198990	a	c	0.937	0.0072	-0.194246	0.0136333	4.62e-46	--	0	0.340795	1	0.5594
rs138867633	8	128333103	a	at	0.8107	0	-0.1453	0.0102	4.809e-46	-?	0	0	0	1
rs2293647	2	173344680	a	c	0.948	0.0048	0.230243	0.0161677	5.105e-46	++	0	0.567241	1	0.4514
rs141271147	17	69106980	t	c	0.6596	0.0109	0.103166	0.0072457	5.305e-46	++	91.3	11.536	1	0.0006826
rs4508782	3	87200292	a	c	0.937	0.0072	-0.194084	0.0136333	5.476e-46	--	0	0.334451	1	0.563
rs1973123	10	51461808	a	g	0.2212	0	0.1694	0.0119	5.533e-46	+?	0	0	0	1
rs115712867	3	87206967	a	c	0.0629	0.0073	0.194164	0.0136447	5.966e-46	++	0	0.4107	1	0.5216
rs75928944	3	87196419	a	t	0.0629	0.0073	0.194127	0.0136446	6.198e-46	++	0	0.381059	1	0.537
rs79472777	3	87199056	t	c	0.9371	0.0073	-0.194041	0.0136446	6.784e-46	--	0	0.378577	1	0.5384
rs76991069	3	87198942	a	g	0.0629	0.0073	0.194041	0.0136446	6.784e-46	++	0	0.378577	1	0.5384
rs199929553	10	51464102	ca	c	0.786	0	-0.1507	0.0106	7.189e-46	-?	0	0	0	1
rs1346814711	3	87175984	t	c	0.4986	0	-0.1123	0.0079	7.375e-46	-?	0	0	0	1
rs78307926	3	87219314	t	c	0.9368	0.0073	-0.193817	0.0136347	7.4e-46	--	0	0.329305	1	0.5661
rs781898293	X	51783661	ct	c	0.3127	0	0.0881	0.0062	7.979e-46	+?	0	0	0	1
rs77171792	3	87175498	t	c	0.063	0.0072	0.193698	0.0136333	8.204e-46	++	0	0.315755	1	0.5742
rs75119017	3	87200962	a	t	0.063	0.0074	0.193799	0.0136447	8.745e-46	++	0	0.368419	1	0.5439
rs16860634	2	173368358	t	g	0.948	0.0048	0.229493	0.0161658	9.675e-46	++	0	0.540834	1	0.4621
rs142731545	2	173394201	t	c	0.948	0.0048	0.229493	0.016166	9.695e-46	++	0	0.540787	1	0.4621
rs57121294	2	173390454	ca	c	0.9479	0.0049	0.229487	0.016166	9.742e-46	++	0	0.541812	1	0.4617
rs115142421	2	173382777	a	t	0.0521	0.0049	-0.229487	0.016166	9.744e-46	--	0	0.54185	1	0.4617
rs7841264	8	128466814	t	c	0.1863	0.0068	-0.126712	0.0089274	1.003e-45	--	94.5	18.1229	1	2.071e-05
rs961017	8	128063756	a	c	0.477	0.0332	-0.0970645	0.0068387	1.007e-45	--	86.7	7.54613	1	0.006014
rs2293645	2	173366960	t	c	0.052	0.0048	-0.229439	0.0161713	1.087e-45	--	0	0.517212	1	0.472
rs1491089845	8	23508978	ct	c	0.4325	0	0.1163	0.0082	1.169e-45	+?	0	0	0	1
rs10930559	2	173352824	t	c	0.052	0.0048	-0.229274	0.0161663	1.18e-45	--	0	0.527028	1	0.4679
rs10101025	8	128452407	t	c	0.8185	0.0239	-0.124307	0.0087676	1.253e-45	--	53.9	2.1682	1	0.1409
rs74355465	2	173410168	a	g	0.0517	0.0047	-0.231174	0.0163094	1.322e-45	--	0	0.593259	1	0.4412
rs59476799	2	173376319	t	c	0.9471	0.0052	0.22806	0.0160968	1.444e-45	++	0	0.472765	1	0.4917
rs6743174	2	173405330	t	g	0.0528	0.0052	-0.229057	0.0161673	1.447e-45	--	0	0.513395	1	0.4737
rs55953261	3	170121598	a	g	0.4836	0.0134	-0.0973884	0.0068776	1.616e-45	--	0	0.319995	1	0.5716
rs9643221	8	128465487	a	g	0.1854	0.0002	-0.126802	0.0089557	1.649e-45	--	93.1	14.4547	1	0.0001436
rs2293648	2	173352157	a	t	0.948	0.0048	0.228889	0.0161664	1.659e-45	++	0	0.507773	1	0.4761
rs79474289	2	173362046	a	c	0.052	0.0048	-0.228868	0.0161658	1.677e-45	--	0	0.511119	1	0.4747
rs7596665	2	173363917	a	g	0.948	0.0048	0.228868	0.0161658	1.677e-45	++	0	0.511119	1	0.4747
rs76275158	11	2222002	t	c	0.1544	0.0072	0.132084	0.0093298	1.687e-45	++	5.2	1.05445	1	0.3045
rs80148637	10	51469030	c	g	0.4817	0	-0.1359	0.0096	1.709e-45	-?	0	0	0	1
rs11414507	5	1291331	a	ac	0.1527	0	-0.1656	0.0117	1.768e-45	-?	0	0	0	1
rs739704	7	27989768	a	g	0.2546	0.0081	-0.111735	0.0078961	1.852e-45	--	71.4	3.50141	1	0.06132
rs183997311	2	242420971	a	g	0.0386	0.0192	-0.364337	0.0257508	1.907e-45	--	0	0.0666403	1	0.7963
rs77843811	3	87196331	t	c	0.0634	0.0075	0.191945	0.0135714	2.054e-45	++	0	0.368424	1	0.5439
rs1456310	8	128052433	a	g	0.4173	0.0142	-0.0976163	0.0069082	2.463e-45	--	75.9	4.14745	1	0.0417
rs115160117	2	173411004	c	g	0.0516	0.0047	-0.231374	0.0163785	2.599e-45	--	0	0.599564	1	0.4387
rs188148040	2	173403330	a	g	0.052	0.0048	-0.229294	0.0162353	2.733e-45	--	0	0.530408	1	0.4664
rs56121376	3	170123144	t	c	0.5167	0.0132	0.0971268	0.0068775	2.767e-45	++	0	0.309435	1	0.578
rs6148064	3	127889268	g	ggtggtgagcacc	0.7257	0.0118	-0.107064	0.0075864	3.174e-45	--	0	0.689539	1	0.4063
rs185475817	2	173403181	a	c	0.052	0.0048	-0.228905	0.0162353	3.84e-45	--	0	0.511945	1	0.4743
rs79101886	8	128413783	t	g	0.096	0.0127	0.159965	0.0113481	4.011e-45	++	82.9	5.85059	1	0.01557
rs6741759	2	173401123	t	c	0.948	0.0048	0.228821	0.0162351	4.124e-45	++	0	0.509236	1	0.4755
rs6730284	2	173401666	t	c	0.052	0.0048	-0.228821	0.0162351	4.125e-45	--	0	0.509273	1	0.4755
rs3019748	11	68924996	a	g	0.3683	0.0211	0.0990274	0.0070326	4.957e-45	++	69.9	3.32395	1	0.06828
rs12056374	8	128052255	t	c	0.5757	0.0139	0.0971802	0.0069026	5.122e-45	++	75	3.99214	1	0.04571
rs146569428	11	2199686	a	g	0.1881	0.0177	0.122154	0.0086836	6.049e-45	++	0	0.58819	1	0.4431
rs147233048	2	173393903	t	c	0.9482	0.0047	0.228266	0.0162348	6.662e-45	++	0	0.485533	1	0.4859
rs57244773	2	173393605	c	g	0.0518	0.0047	-0.228266	0.0162348	6.662e-45	--	0	0.485533	1	0.4859
rs183141927	2	173392942	a	t	0.0518	0.0047	-0.228266	0.0162348	6.662e-45	--	0	0.485533	1	0.4859
rs11077547	17	69104964	t	c	0.655	0.0131	0.101884	0.0072466	6.73e-45	++	91.3	11.516	1	0.00069
rs116846195	8	128386267	a	g	0.0117	0.0023	0.414539	0.0294891	6.94e-45	++	77.2	4.39022	1	0.03615
rs10505473	8	128417936	t	c	0.1648	0.0183	0.12726	0.0090551	7.294e-45	++	55.9	2.26576	1	0.1323
rs35947769	X	51534862	ct	c	0.6364	0	-0.0871	0.0062	7.881e-45	-?	0	0	0	1
rs1086568	6	160606525	t	c	0.1104	0.0114	0.150934	0.0107457	8.154e-45	++	0	0.962032	1	0.3267
rs76557883	3	87173762	a	t	0.0635	0.0067	0.191082	0.013606	8.394e-45	++	0	0.599456	1	0.4388
rs9847576	3	127937645	a	g	0.2767	0.0102	0.105606	0.0075231	9.186e-45	++	0	0.770141	1	0.3802
rs2811476	3	127898501	a	c	0.7263	0.0107	-0.10564	0.0075291	1.009e-44	--	0	0.60404	1	0.437
rs2924553	11	68889390	a	t	0.4133	0.0092	0.0966928	0.0068927	1.048e-44	++	0	0.739819	1	0.3897
rs4857874	3	127934269	a	t	0.2766	0.0103	0.105534	0.0075231	1.051e-44	++	0	0.780939	1	0.3769
rs7372439	3	127931402	a	g	0.2767	0.0102	0.105534	0.0075231	1.052e-44	++	0	0.780835	1	0.3769
rs9857235	3	127939034	a	t	0.2766	0.0103	0.105533	0.0075231	1.053e-44	++	0	0.780523	1	0.377
rs9814834	3	127938137	a	g	0.7234	0.0103	-0.105533	0.0075231	1.054e-44	--	0	0.780418	1	0.377
rs4857877	3	127948060	a	g	0.2763	0.0105	0.105533	0.0075231	1.054e-44	++	0	0.780314	1	0.377
rs192185817	2	242068328	a	g	0.0367	0.0175	-0.396547	0.0282707	1.069e-44	--	0	0.383156	1	0.5359
rs12615584	2	173397690	t	c	0.9481	0.0047	0.227653	0.016235	1.138e-44	++	0	0.455976	1	0.4995
rs56882727	2	173401348	a	g	0.9482	0.0047	0.227653	0.0162351	1.139e-44	++	0	0.455954	1	0.4995
rs57587465	2	173399767	t	c	0.9482	0.0047	0.227651	0.0162351	1.141e-44	++	0	0.456303	1	0.4994
rs75669437	2	173395373	a	g	0.0519	0.0047	-0.227646	0.0162349	1.143e-44	--	0	0.456962	1	0.499
rs10840588	11	2229645	t	g	0.2645	0.0202	0.107197	0.007645	1.148e-44	++	0	0.235274	1	0.6276
rs4857872	3	127933822	t	g	0.2767	0.0102	0.105461	0.0075231	1.206e-44	++	0	0.791393	1	0.3737
rs4857875	3	127934276	t	c	0.7233	0.0102	-0.105461	0.0075231	1.206e-44	--	0	0.791393	1	0.3737
rs6439121	3	127935461	c	g	0.7234	0.0103	-0.105461	0.0075231	1.206e-44	--	0	0.791393	1	0.3737
rs9838120	3	127930459	a	g	0.2767	0.0102	0.105461	0.0075231	1.207e-44	++	0	0.791184	1	0.3737
rs7372902	3	127940440	c	g	0.7234	0.0103	-0.10546	0.0075231	1.208e-44	--	0	0.790974	1	0.3738
rs4857873	3	127934218	a	g	0.2766	0.0103	0.105456	0.0075232	1.219e-44	++	0	0.789563	1	0.3742
rs2924552	11	68889367	t	c	0.4133	0.0092	0.0965964	0.0068928	1.28e-44	++	0	0.699605	1	0.4029
rs7217652	17	69119481	t	c	0.6549	0.0133	0.101512	0.0072452	1.337e-44	++	92	12.4342	1	0.0004215
rs3122173	3	127889287	a	g	0.7233	0.0102	-0.105421	0.0075243	1.341e-44	--	0	0.896746	1	0.3437
rs6775988	3	127944477	c	g	0.2766	0.0102	0.105398	0.0075234	1.365e-44	++	0	0.845855	1	0.3577
rs6770140	3	127934329	t	c	0.2766	0.0103	0.105393	0.0075231	1.37e-44	++	0	0.803819	1	0.37
rs4384971	3	127934774	a	c	0.7233	0.0102	-0.105388	0.0075231	1.382e-44	--	0	0.801917	1	0.3705
rs2492285	3	127918000	a	g	0.2766	0.0103	0.105387	0.0075232	1.385e-44	++	0	0.801592	1	0.3706
rs4857838	3	127943328	a	g	0.2767	0.0102	0.105387	0.0075231	1.385e-44	++	0	0.801495	1	0.3706
rs9845651	3	127940353	t	g	0.2766	0.0103	0.105387	0.0075231	1.386e-44	++	0	0.801389	1	0.3707
rs6777054	3	127945349	a	g	0.7233	0.0103	-0.105389	0.0075234	1.387e-44	--	0	0.802527	1	0.3703
rs7374072	3	127930866	a	c	0.7233	0.0102	-0.105383	0.0075232	1.399e-44	--	0	0.799864	1	0.3711
rs4323023	3	127939357	a	t	0.7234	0.0103	-0.105379	0.0075232	1.407e-44	--	0	0.798323	1	0.3716
rs74800879	8	128444599	t	c	0.1612	0.0199	0.127736	0.0091209	1.457e-44	++	58.2	2.39513	1	0.1217
rs10826075	10	51527370	c	g	0.7596	0	-0.1288	0.0092	1.559e-44	-?	0	0	0	1
rs9879865	3	127936527	t	c	0.7233	0.0102	-0.105314	0.0075231	1.588e-44	--	0	0.812085	1	0.3675
rs2811508	3	127920023	t	c	0.7232	0.0102	-0.105314	0.0075232	1.588e-44	--	0	0.812183	1	0.3675
rs2811513	3	127909564	a	g	0.2766	0.0103	0.105314	0.0075232	1.589e-44	++	0	0.812077	1	0.3675
rs76738244	2	173382986	a	g	0.0516	0.0046	-0.227253	0.0162348	1.605e-44	--	0	0.440367	1	0.5069
rs2811480	3	127902091	t	g	0.2767	0.0103	0.105296	0.0075237	1.663e-44	++	0	0.927713	1	0.3355
rs138822454	2	173409320	a	g	0.9486	0.0045	0.229156	0.0163771	1.732e-44	++	0	0.501401	1	0.4789
rs2811509	3	127916551	a	g	0.2766	0.0103	0.105252	0.0075232	1.783e-44	++	0	0.827334	1	0.363
rs9879866	3	127936532	t	c	0.7233	0.0102	-0.105241	0.0075231	1.821e-44	--	0	0.822745	1	0.3644
rs6439123	3	127941439	t	c	0.2766	0.0103	0.105241	0.0075231	1.821e-44	++	0	0.822745	1	0.3644
rs368338006	11	68911198	t	tg	0.7187	0	-0.1231	0.0088	1.829e-44	-?	0	0	0	1
rs2999052	3	127892037	t	c	0.7232	0.0102	-0.105247	0.007524	1.839e-44	--	0	0.949421	1	0.3299
rs181480655	2	173403101	a	g	0.0517	0.0046	-0.227051	0.0162349	1.914e-44	--	0	0.471885	1	0.4921
rs117656581	8	128540688	a	g	0.0291	0.0135	0.323849	0.0231564	1.917e-44	++	75.6	4.09013	1	0.04313
rs57404607	2	173377277	t	g	0.0517	0.0047	-0.227026	0.0162346	1.951e-44	--	0	0.429333	1	0.5123
rs67219047	8	128414585	a	g	0.1642	0.0187	0.126626	0.0090553	1.962e-44	++	60.2	2.51082	1	0.1131
rs12334317	8	128408064	t	c	0.8359	0.0187	-0.126604	0.0090554	2.035e-44	--	60.8	2.5532	1	0.1101
rs59374567	2	173377302	t	c	0.0518	0.0047	-0.226948	0.0162346	2.087e-44	--	0	0.425988	1	0.514
rs6439122	3	127940534	a	g	0.2768	0.0102	0.105168	0.0075231	2.087e-44	++	0	0.833475	1	0.3613
rs35292857	10	51546461	ct	c	0.6789	0	-0.1342	0.0096	2.089e-44	-?	0	0	0	1
rs78623829	2	173379230	a	g	0.0516	0.0046	-0.226929	0.0162354	2.142e-44	--	0	0.428987	1	0.5125
rs2811481	3	127904496	t	c	0.7233	0.0103	-0.105161	0.0075242	2.173e-44	--	0	0.913309	1	0.3392
rs79481012	2	173401264	t	g	0.9484	0.0046	0.226874	0.0162351	2.237e-44	++	0	0.422067	1	0.5159
rs2811515	3	127905518	a	g	0.2767	0.0102	0.105095	0.0075232	2.392e-44	++	0	0.844374	1	0.3581
rs2811516	3	127905451	a	g	0.7233	0.0102	-0.105095	0.0075232	2.392e-44	--	0	0.844374	1	0.3581
rs80061972	3	87196519	a	g	0.0642	0.0079	0.189546	0.0135711	2.482e-44	++	0	0.28494	1	0.5935
rs7357368	8	128443387	t	c	0.1613	0.0199	0.127383	0.0091203	2.484e-44	++	59.5	2.47075	1	0.116
rs147340898	2	173406018	a	g	0.0515	0.0046	-0.227734	0.0163054	2.486e-44	--	0	0.450466	1	0.5021
rs2687729	3	127895226	a	g	0.7231	0.0101	-0.105081	0.007524	2.508e-44	--	0	0.963948	1	0.3262
rs6465657	7	97816327	t	c	0.5207	0.0267	-0.0949722	0.0068026	2.691e-44	--	47.2	1.89386	1	0.1688
rs60096331	2	173375391	c	g	0.9484	0.0046	0.226636	0.0162346	2.732e-44	++	0	0.412737	1	0.5206
rs61612821	17	36099970	t	c	0.8539	0	0.1675	0.012	2.799e-44	+?	0	0	0	1
rs2132276	7	97826340	a	g	0.5222	0.0273	-0.0949411	0.0068026	2.865e-44	--	43.8	1.77983	1	0.1822
rs2811479	3	127901786	a	g	0.2765	0.0099	0.105035	0.0075278	3.015e-44	++	0	0.904695	1	0.3415
rs6465658	7	97816638	c	g	0.5208	0.0267	-0.0948707	0.0068028	3.337e-44	--	47.2	1.89523	1	0.1686
rs6965016	7	97807882	a	c	0.5206	0.0266	-0.094868	0.0068031	3.379e-44	--	47.3	1.89748	1	0.1684
rs3801294	7	97822210	a	g	0.5222	0.0273	-0.094859	0.0068027	3.404e-44	--	45.5	1.83492	1	0.1755
rs61173909	8	128469579	g	gct	0.5189	0	0.1241	0.0089	3.431e-44	+?	0	0	0	1
rs7791463	7	97819047	a	g	0.5208	0.0267	-0.0948143	0.0068027	3.736e-44	--	46.4	1.86529	1	0.172
rs4857878	3	127948149	t	c	0.274	0.0077	0.105036	0.0075362	3.747e-44	++	0	0.788929	1	0.3744
rs6003062	22	43499741	a	g	0.0619	0.0131	-0.215485	0.0154616	3.783e-44	--	59.4	2.46391	1	0.1165
rs59970483	2	173378344	a	g	0.0517	0.0047	-0.226166	0.0162347	4.106e-44	--	0	0.393746	1	0.5303
rs1445225501	17	69113577	a	t	0.6535	0	0.117	0.0084	4.248e-44	+?	0	0	0	1
rs1303683159	2	63173130	ct	c	0.4926	0	-0.11	0.0079	4.525e-44	-?	0	0	0	1
rs11763970	7	97817321	a	g	0.4777	0.0273	0.0947119	0.0068026	4.604e-44	++	44.4	1.79937	1	0.1798
rs11764933	7	97825188	a	g	0.5222	0.0273	-0.0947094	0.0068028	4.644e-44	--	44.5	1.80125	1	0.1796
rs6439119	3	127923187	t	c	0.2762	0.0105	0.10473	0.0075231	4.721e-44	++	0	0.899535	1	0.3429
rs113511744	22	43499263	a	t	0.0618	0.0132	-0.215463	0.0154813	4.948e-44	--	62.4	2.65788	1	0.103
rs28626202	8	128464353	a	c	0.1865	0.0004	-0.125532	0.0090197	4.951e-44	--	93.5	15.3089	1	9.129e-05
rs11765552	7	97822115	a	t	0.5223	0.0273	-0.0946387	0.0068027	5.355e-44	--	43.9	1.7816	1	0.182
rs58376190	8	128464949	a	g	0.1857	0.0013	-0.124668	0.0089677	6.166e-44	--	94.3	17.3971	1	3.033e-05
rs34834087	3	127948958	t	tc	0.7248	0.0086	-0.104733	0.0075341	6.22e-44	--	0	0.673991	1	0.4117
rs16860643	2	173371278	a	g	0.9466	0.0054	0.222695	0.0160203	6.265e-44	++	0	0.286009	1	0.5928
rs2739443	19	51341326	a	g	0.1026	0.0182	-0.167528	0.0120574	6.872e-44	--	0	0.172462	1	0.6779
rs1846049	3	87228820	a	g	0.0629	0.0071	0.189465	0.0136378	7.026e-44	++	0	0.204346	1	0.6512
rs11707297	3	127933203	c	g	0.7164	0.0148	-0.104168	0.0074997	7.321e-44	--	0	0.388022	1	0.5333
rs13434079	3	127963448	a	g	0.2835	0.0149	0.104144	0.0074999	7.689e-44	++	0	0.437281	1	0.5084
rs4074440	3	127958013	a	g	0.7164	0.0147	-0.104144	0.0074999	7.702e-44	--	0	0.408895	1	0.5225
rs6003061	22	43499703	t	c	0.9381	0.0132	0.214941	0.0154793	7.736e-44	++	61.8	2.61546	1	0.1058
rs78647569	2	173415706	c	g	0.9501	0.0039	0.230269	0.0165922	8.591e-44	++	0	0.504889	1	0.4774
rs7828855	8	128466988	a	t	0.1823	0.0021	-0.125498	0.0090438	8.762e-44	--	93.9	16.3908	1	5.154e-05
rs720524	8	128070449	a	t	0.4779	0.0329	-0.0959269	0.0069135	8.935e-44	--	84.5	6.45462	1	0.01107
rs6003064	22	43499972	t	g	0.0619	0.0132	-0.214761	0.0154801	9.195e-44	--	60.9	2.55792	1	0.1097
rs77142279	3	87232991	a	g	0.0629	0.0071	0.189167	0.0136383	9.589e-44	++	0	0.204078	1	0.6514
rs2811514	3	127907929	a	g	0.7163	0.0147	-0.104022	0.0074997	9.602e-44	--	0	0.402826	1	0.5256
rs28485589	2	173303031	a	g	0.9392	0	0.2441	0.0176	9.72e-44	+?	0	0	0	1
rs1342821020	2	173303484	ctt	c	0.9396	0	0.244	0.0176	1.052e-43	+?	0	0	0	1
rs74483274	2	173303251	a	g	0.9396	0	0.244	0.0176	1.052e-43	+?	0	0	0	1
rs79416408	2	173303800	t	c	0.0604	0	-0.244	0.0176	1.052e-43	-?	0	0	0	1
rs13267780	8	128357817	a	g	0.2357	0.0207	-0.112832	0.0081396	1.074e-43	--	84.5	6.45816	1	0.01104
rs6003063	22	43499899	t	c	0.0619	0.0132	-0.214565	0.0154798	1.092e-43	--	60.9	2.55515	1	0.1099
rs76837457	2	173303391	t	g	0.0604	0	-0.2439	0.0176	1.139e-43	-?	0	0	0	1
rs61212679	3	170098439	a	t	0.5569	0.0095	-0.0954102	0.0068871	1.211e-43	--	0	0.344696	1	0.5571
rs9873786	3	127942379	a	g	0.2836	0.0148	0.103877	0.0074997	1.257e-43	++	0	0.418137	1	0.5179
rs2811512	3	127911820	a	g	0.2836	0.0148	0.103876	0.0074997	1.259e-43	++	0	0.417906	1	0.518
rs9830294	3	127946788	a	g	0.7164	0.0148	-0.103863	0.0074998	1.292e-43	--	0	0.414353	1	0.5198
rs80010354	2	173303310	a	g	0.0604	0	-0.2437	0.0176	1.334e-43	-?	0	0	0	1
rs77764698	3	87222687	a	g	0.0623	0.0069	0.189803	0.0137081	1.344e-43	++	0	0.207521	1	0.6487
rs67754732	8	128279676	a	g	0.8271	0.0079	0.128533	0.0092837	1.362e-43	++	87.5	7.98468	1	0.004717
rs13414928	2	173304302	a	g	0.9382	0	0.2422	0.0175	1.462e-43	+?	0	0	0	1
rs10936632	3	170130102	a	c	0.5156	0.0138	0.0951706	0.0068766	1.465e-43	++	0	0.246422	1	0.6196
rs7831442	8	23512136	c	g	0.6616	0.0488	-0.099462	0.0071867	1.467e-43	--	80.8	5.21184	1	0.02243
rs11773905	8	23511163	t	c	0.6613	0.0487	-0.0993992	0.0071867	1.658e-43	--	81	5.24942	1	0.02195
rs4242402	8	23513730	t	c	0.3386	0.0487	0.0993701	0.0071866	1.749e-43	++	80.8	5.21963	1	0.02233
rs113945618	11	2210658	a	g	0.775	0.0124	-0.111627	0.0080772	1.933e-43	--	40.4	1.67914	1	0.195
rs17435847	7	97792820	a	g	0.5229	0.0276	-0.0940097	0.0068032	1.971e-43	--	46.5	1.86916	1	0.1716
rs13282506	8	128459125	a	g	0.2522	0.023	-0.110657	0.008009	2.024e-43	--	63.5	2.73926	1	0.09791
rs4803899	19	38727640	a	t	0.4445	0.0302	0.095338	0.0069006	2.046e-43	++	75.9	4.14281	1	0.04181
rs1554535	3	127895986	a	g	0.2836	0.0147	0.103623	0.0075008	2.072e-43	++	0	0.521487	1	0.4702
rs2811482	3	127904943	t	c	0.2837	0.0148	0.10359	0.0075004	2.183e-43	++	0	0.480324	1	0.4883
rs13274763	8	23518785	a	g	0.3387	0.0487	0.0992202	0.0071865	2.327e-43	++	81	5.26968	1	0.0217
rs2955120	3	127888347	t	g	0.7164	0.0147	-0.103541	0.0075008	2.407e-43	--	0	0.527188	1	0.4678
rs59573937	8	128465040	t	c	0.1864	0.0004	-0.123595	0.0089555	2.516e-43	--	93.8	16.2196	1	5.641e-05
rs4857841	3	128046643	a	g	0.2871	0.0164	0.102475	0.0074259	2.558e-43	++	0	0.522049	1	0.47
rs3849531	3	128058617	a	t	0.7129	0.0167	-0.102462	0.0074257	2.607e-43	--	0	0.517811	1	0.4718
rs5751435	22	43513156	t	c	0.1166	0.0082	-0.151786	0.0110005	2.616e-43	--	83.5	6.05128	1	0.0139
[truncated: 25,211 more rows]

## Sheet: Supplementary File 1B
Trait1	Trait2	N1_pcut	N2_pcut	Nshare_direct	Nshare_LDpairComb	Nshare_all	N_expected	P_fisher	Padj_FDR	Padj_Bonferroni	Jaccard	Sorensen	ChaoSorensen	SNPshare_all	Trait2_EFO	Trait2_ParentTerm	Trait2_ParentEFO
Prostate cancer	prostate specific antigen measurement	1377	50	4	14	18	0.0421127	7.16e-43	9.57e-40	1.91e-39	0.012775	0.0252278	0.128366	rs2739472-rs2739456|rs381949-rs2735948|rs35135824-rs4614003-rs8534|rs12131120-rs6662386-rs305459|rs61752561|rs10486567|rs6763927-rs1991431|rs11665698-rs11665748|rs17632542|rs174776-rs266849-rs1058205|rs12414856-rs7478029-rs10749415-rs74158588|rs266868-rs2569747|rs10886900-rs10886902|rs17464492-rs13267780-rs443053|rs4752569-rs2860197|rs13272392-rs11135766|rs12285347|rs3847136-rs6983267-rs10505477	http://www.ebi.ac.uk/efo/EFO_0004624	Other measurement	http://www.ebi.ac.uk/efo/EFO_0001444
Prostate cancer	body height	1377	2984	1	36	37	2.51328	2.18e-30	1.46e-27	5.84e-27	0.00855689	0.0169686	0.198106	rs2256814-rs1058319|rs2748952-rs6907476|rs2028900-rs719023-rs2289976-rs2232748|rs74520550-rs3753639|rs7557989-rs4608575|rs2517528-rs2251830-rs3131789|rs7924316-rs2070762|rs11263465-rs56040001-rs11263593-rs7118260|rs1148764-rs1926872|rs7094871-rs11196169|rs3212880-rs55911137|rs202087309-rs2454206-rs2955170|rs10786678-rs12572775|rs12785905-rs7952436|rs5766632-rs6006989|rs10870546-rs4296106|rs676392…	http://www.ebi.ac.uk/efo/EFO_0004339	Body measurement	http://www.ebi.ac.uk/efo/EFO_0004324
Prostate cancer	BMI-adjusted waist-hip ratio	1377	1178	3	22	25	0.992174	1.32e-26	7.04e-24	3.52e-23	0.00988142	0.0195695	0.15207	rs2048622-rs6795831|rs62266958|rs79589031-rs76731738-rs111658239-rs73086934|rs12629813-rs2271494|rs7094871|rs547176-rs668871-rs10755578|rs2744948-rs9469899|rs2844531-rs2233974|rs4940127-rs1539871|rs1567441-rs7453836|rs11124930|rs905938-rs3753639-rs2242195|rs2244524-rs4285804-rs10786678|rs11666569-rs16981598|rs7005862-rs191785584-rs77541621|rs146564277-rs76268375-rs150138294|rs2647249-rs35515350|r…	http://www.ebi.ac.uk/efo/EFO_0007788	Body measurement	http://www.ebi.ac.uk/efo/EFO_0004324
Prostate cancer	high density lipoprotein cholesterol measurement	1377	861	1	19	20	0.72518	2.38e-22	7.97e-20	6.37e-19	0.00901713	0.0178731	0.10891	rs9469899-rs2263329|rs12151131-rs34559316|rs2523978-rs1264622-rs1264377|rs1086056-rs55955923|rs12769682-rs11245450-rs1970811|rs7769059-rs887468-rs3134776|rs7725218|rs9368731-rs9274346-rs9273555|rs4997370-rs10911221|rs13072540-rs3773910|rs12785905-rs34695471|rs12145743-rs2768765|rs1538247-rs12055786-rs611499|rs708723-rs3747973-rs1172198|rs10911505-rs1148764|rs569426962-rs56325564|rs6905775-rs28366…	http://www.ebi.ac.uk/efo/EFO_0004612	Lipid or lipoprotein measurement	http://www.ebi.ac.uk/efo/EFO_0004732
Prostate cancer	systolic blood pressure	1377	1027	1	20	21	0.864994	2.93e-22	8.05e-20	7.84e-19	0.00881242	0.0174709	0.111578	rs72821624-rs112028067|rs77559646-rs139354822|rs111791351-rs28510837|rs735664-rs12700814-rs1111647|rs34547036-rs4387287|rs10160382-rs7936656|rs11666569-rs7246865|rs6062302-rs6062298-rs201497780-rs2256814|rs9281573-rs805303|rs1881966-rs12638862|rs12666259-rs2023843|rs17706790|rs4357749-rs5742643|rs114439111-rs141212865|rs12881375-rs12887631|rs10069690-rs2242652-rs7725218|rs3867466-rs564601|rs72282…	http://www.ebi.ac.uk/efo/EFO_0006335	Other measurement	http://www.ebi.ac.uk/efo/EFO_0001444
Prostate cancer	balding measurement	1377	728	1	18	19	0.61316	3.01e-22	8.05e-20	8.05e-19	0.00910834	0.0180523	0.104577	rs12808959-rs7118260|rs9636121-rs117647783|rs17408037|rs71899872-rs7537691-rs111689685-rs4521985|rs11588675-rs10911221-rs41475048|rs5825066-rs3933617|rs7841949-rs7823049|rs28613067-rs73985893|rs11202719-rs796945|rs10888690-rs6678244|rs72617743-rs62331124|rs6007594-rs6006989|rs12587232-rs7140266|rs138697114-rs201770780-rs142756290|rs1498617-rs629241|rs1134941-rs740313-rs55659209|rs6763927-rs765060…	http://www.ebi.ac.uk/efo/EFO_0007825	Other measurement	http://www.ebi.ac.uk/efo/EFO_0001444
Prostate cancer	leukocyte count	1377	830	2	17	19	0.69907	3.46e-21	8.4e-19	9.24e-18	0.00868373	0.0172179	0.099276	rs28687325-rs7213269|rs138909-rs47340|rs7705526-rs7725218|rs3735529-rs62454415|rs1716488-rs1245035|rs2524079|rs4364506-rs7740107|rs2244524-rs10786678-rs10883756|rs11800059-rs11204677|rs719023-rs11891495-rs2232748|rs1045916-rs10953258|rs12570611-rs35879747|rs78378222|rs117647783-rs113028115|rs56232506-rs4724578|rs1861270-rs7588895-rs10931933|rs66592032-rs10896437-rs11228501-rs11228517|rs10007915-r…	http://www.ebi.ac.uk/efo/EFO_0004308	Hematological measurement	http://www.ebi.ac.uk/efo/EFO_0004503
Prostate cancer	blood protein measurement	1377	1785	2	22	24	1.50342	4.95e-21	1.1e-18	1.32e-17	0.00764818	0.0151803	0.1094	rs558163186-rs2844616|rs72821624-rs10209140|rs2157333-rs9268896|rs72702561-rs41271951|rs1800057-rs74911261|rs3786872-rs71354995-rs148041688|rs11751347-rs77009508-rs34747443|rs114430970-rs200930495|rs10911221-rs4129858-rs41475048|rs2768765-rs4399146|rs9273552-rs6905775-rs9273555-rs4713572|rs1027550-rs73235147|rs16896742-rs28749114|rs1634738-rs9265885|rs600324-rs629849|rs12794995-rs1695|rs3132451|r…	http://www.ebi.ac.uk/efo/EFO_0007937	Other measurement	http://www.ebi.ac.uk/efo/EFO_0001444
Prostate cancer	body mass index	1377	2122	2	23	25	1.78726	1.71e-20	3.27e-18	4.57e-17	0.00719632	0.0142898	0.106685	rs11500477-rs10838703|rs146564277-rs141845046|rs55916270-rs905993|rs9819144-rs1568488|rs3132947-rs204999|rs547176-rs487152-rs10755578|rs10840606-rs11564693-rs6579000|rs5799921-rs12427047|rs2472644-rs594821|rs3130048-rs3132451|rs17636031-rs12769682-rs1561589|rs10845938-rs12422552|rs4364506-rs6569648|rs4619804-rs336620|rs34870876-rs76594121|rs2242195|rs510326-rs534840|rs11629783-rs80326387|rs153824…	http://www.ebi.ac.uk/efo/EFO_0004340	Body measurement	http://www.ebi.ac.uk/efo/EFO_0004324
Prostate cancer	heel bone mineral density	1377	2103	1	23	24	1.77126	2.02e-19	3.37e-17	5.39e-16	0.00694444	0.0137931	0.0984222	rs217-rs6968704-rs10486567|rs7747253-rs16896742|rs503905-rs564601|rs7219890-rs56320441|rs4633921-rs2302011|rs6763927-rs1991431|rs4364506-rs6899976|rs11691517-rs13429049|rs7703857-rs7727562|rs7571898-rs13429533-rs6740722|rs607518-rs78132593|rs10122495-rs747091|rs71581597-rs6853490|rs72617743-rs62331124|rs1859165-rs886340|rs10239787-rs11760913-rs7787576|rs116918730|rs1151490-rs2306364-rs11227289|rs…	http://www.ebi.ac.uk/efo/EFO_0009270	Other measurement	http://www.ebi.ac.uk/efo/EFO_0001444
Prostate cancer	apolipoprotein A 1 measurement	1377	458	0	15	15	0.385752	2.48e-19	3.9e-17	6.62e-16	0.00824176	0.0163488	0.0745417	rs4646239-rs3120139-rs3120137|rs10752898-rs10911221|rs2523978-rs1264622-rs1264377|rs6763927-rs6807935|rs708723-rs3747973-rs1172198|rs374071816-rs10455872|rs1086056-rs55955923|rs7770628-rs6903649|rs1567441-rs6919346|rs41272086-rs77009508-rs34747443|rs6062298-rs2256814-rs6062510|rs339351-rs1406982|rs13072540-rs35650976|rs78132593-rs267738|rs9884482-rs2955170	http://www.ebi.ac.uk/efo/EFO_0004614	Lipid or lipoprotein measurement	http://www.ebi.ac.uk/efo/EFO_0004732
Prostate cancer	type II diabetes mellitus	1377	605	1	15	16	0.509563	4.67e-19	6.94e-17	1.25e-15	0.00813835	0.0161453	0.0782431	rs72853903-rs4929965|rs11654476-rs9911983|rs547176-rs622217-rs10755578|rs55911137-rs11820019|rs1048169-rs7022807|rs13072540-rs4472028|rs7918400-rs7094871|rs72930621-rs72928978|rs1148764-rs1327123|rs3094188-rs3130501|rs2066827|rs601945-rs6905775-rs114430970-rs9273401-rs9272226-rs9271726|rs11564693-rs6579000-rs7937915|rs10122495-rs1758632|rs4244808-rs7924316|rs329117-rs329122	NA	NA	NA
Prostate cancer	eosinophil count	1377	791	0	17	17	0.666222	1.17e-18	1.65e-16	3.13e-15	0.0079033	0.0156827	0.0804053	rs4809317-rs311500|rs5825066-rs12454487|rs564601-rs7119563|rs11264297-rs2242195-rs11264296-rs56103503|rs1859161-rs723534|rs2028900-rs699664-rs6729475|rs61088131-rs113631324-rs117647783|rs1866347-rs6557705-rs11135766|rs11253511-rs34487581|rs78378222-rs35850753|rs4857906-rs6803892-rs4857855|rs3003858-rs4242949-rs2990870|rs339351-rs1741663|rs6996809-rs9297718|rs6433362-rs11895564|rs2010972-rs2811484…	http://www.ebi.ac.uk/efo/EFO_0004842	Hematological measurement	http://www.ebi.ac.uk/efo/EFO_0004503
Prostate cancer	diastolic blood pressure	1377	545	2	13	15	0.459028	3.26e-18	4.36e-16	8.72e-15	0.00786576	0.0156087	0.0709483	rs4245739-rs2125855|rs2164735-rs13014371|rs55955923-rs73158427|rs78378222|rs12881375-rs7161323|rs34547036-rs4387287|rs62501779-rs6984769|rs7103648-rs10838703|rs1538247-rs9479509-rs611499|rs3132510-rs2233974|rs34163044-rs5825066|rs9281573-rs805303|rs1761870-rs6913428-rs200362577-rs1741688-rs339351|rs1859168-rs12666259|rs41475048	http://www.ebi.ac.uk/efo/EFO_0006336	Other measurement	http://www.ebi.ac.uk/efo/EFO_0001444
Prostate cancer	waist-hip ratio	1377	723	0	16	16	0.608949	7.61e-18	9.69e-16	2.04e-14	0.00767754	0.0152381	0.0735383	rs10239311-rs6955431|rs6550597-rs336620|rs79589031-rs76731738-rs111658239-rs73086934|rs547176-rs668871-rs10755578|rs2744948-rs9469899|rs11666569-rs7246865|rs2048622-rs9837325|rs905938-rs3753639-rs2242195|rs28408682-rs2244524-rs10786678|rs620861-rs76102714-rs443053|rs7005862-rs191785584-rs77541621|rs115770674-rs9625483|rs4364506-rs9402211|rs12287076-rs10838703|rs3758938-rs12794995|rs17035310-rs561…	http://www.ebi.ac.uk/efo/EFO_0004343	Body measurement	http://www.ebi.ac.uk/efo/EFO_0004324
Prostate cancer	triglyceride measurement	1377	746	1	15	16	0.628321	1.24e-17	1.51e-15	3.32e-14	0.00759373	0.015073	0.072686	rs2412099-rs12185242|rs1861270-rs3769823|rs2306364-rs11227289-rs75601653|rs1278530-rs6678244|rs4776793-rs4776304|rs6671166-rs4521985|rs547176-rs3105749-rs10755578|rs58839393-rs72613901-rs7605725-rs7595299|rs2428503-rs2523719-rs1264377|rs73025562-rs628031|rs4924487-rs72735627|rs9457993-rs7759633|rs77009508|rs2028900-rs10172544-rs719023-rs6729475|rs4364506-rs9375694|rs73081656-rs67494041	http://www.ebi.ac.uk/efo/EFO_0004530	Lipid or lipoprotein measurement	http://www.ebi.ac.uk/efo/EFO_0004529
Prostate cancer	cutaneous melanoma	1377	71	1	8	9	0.0598	1.48e-17	1.72e-15	3.95e-14	0.00625434	0.0124309	0.0349923	rs76798800-rs3753639-rs2242195|rs7705526-rs7725218|rs78378222|rs2735948-rs13178866|rs2735846-rs2853667|rs7902587-rs34547036|rs143190905-rs75691080|rs1861270-rs10931936|rs2967383-rs11645286	http://www.ebi.ac.uk/efo/EFO_0000389	Cancer	http://www.ebi.ac.uk/efo/EFO_0000616
Prostate cancer	glomerular filtration rate	1377	481	1	13	14	0.405124	1.98e-17	2.2e-15	5.29e-14	0.00759219	0.01507	0.0640434	rs149236266-rs73025532|rs6763927-rs7624084|rs2306364-rs11227289-rs948493|rs61897431-rs10838703|rs653753-rs316020|rs204999-rs3134605|rs4364506-rs7740107|rs34647824-rs73058052|rs3018691-rs3892895|rs1264351-rs1264377|rs78132593-rs267738|rs72930621|rs4646239-rs3120137-rs12207180-rs316001|rs6767869-rs1525362	http://www.ebi.ac.uk/efo/EFO_0005208	Other measurement	http://www.ebi.ac.uk/efo/EFO_0001444
Prostate cancer	risk-taking behaviour	1377	514	1	13	14	0.432918	4.94e-17	5.29e-15	1.32e-13	0.00745871	0.014807	0.0628622	rs4721134-rs1078112|rs10007915-rs28633885-rs6839705|rs12673949-rs1111647|rs35756290-rs12244388|rs336620-rs13095117|rs611499|rs2075375-rs2539985|rs11111197-rs4357749|rs10858922-rs5799921|rs202087309-rs2955170-rs2647257|rs13021322-rs10173115|rs9275160-rs3021058|rs541421140-rs3130977|rs992493-rs35515350	http://www.ebi.ac.uk/efo/EFO_0008579	Biological process	http://purl.obolibrary.org/obo/GO_0008150
Prostate cancer	basal cell carcinoma	1377	83	1	8	9	0.069907	6.46e-17	6.64e-15	1.73e-13	0.00620262	0.0123288	0.0347549	rs60269255-rs28510837|rs78378222|rs72702561-rs41271951|rs421284-rs2735948|rs1861270-rs6714430|rs144947706-rs34694416|rs1870940-rs3753639-rs2242195|rs700755-rs4724578|rs34547036-rs9419958	http://www.ebi.ac.uk/efo/EFO_0004193	Cancer	http://www.ebi.ac.uk/efo/EFO_0000616
Prostate cancer	BMI-adjusted waist circumference	1377	1266	1	17	18	1.06629	1.47e-16	1.46e-14	3.93e-13	0.00685714	0.0136209	0.073028	rs117647783-rs741070|rs746429-rs2306364-rs11227289|rs11452686-rs10238339-rs10239311|rs11097881-rs12498981-rs201770780-rs17253672|rs11650424-rs11247554|rs1148764-rs10797938|rs12794995|rs6062298-rs2256814-rs4809221|rs1887295-rs57882451|rs76102714-rs366991-rs443053|rs2903386-rs2955170|rs10933548-rs55659209|rs2244524-rs4285804-rs10786678|rs11666569-rs16981598|rs6763927-rs6767899|rs7952436-rs56223081-…	http://www.ebi.ac.uk/efo/EFO_0007789	Body measurement	http://www.ebi.ac.uk/efo/EFO_0004324
Prostate cancer	mean corpuscular hemoglobin	1377	918	4	12	16	0.773189	3.09e-16	2.95e-14	8.26e-13	0.00702062	0.0139434	0.0668857	rs34547036-rs10786774|rs7705526-rs7725218|rs2942202|rs34978822-rs35640778|rs4988362|rs2327436-rs6919121|rs2977562-rs9847576|rs9700528-rs4521985|rs150504233-rs118126621|rs8534|rs78378222|rs2942219-rs950893|rs35756290-rs1046411|rs4924487-rs7172947|rs13006529-rs7588895|rs10870546-rs61952071	http://www.ebi.ac.uk/efo/EFO_0004527	Hematological measurement	http://www.ebi.ac.uk/efo/EFO_0004503
Prostate cancer	low density lipoprotein cholesterol measurement	1377	593	1	13	14	0.499456	3.52e-16	3.25e-14	9.42e-13	0.00715746	0.0142132	0.0602017	rs10445374-rs569426962|rs12197047-rs4364506|rs10953258-rs377584195-rs74672857|rs12990177-rs1038822-rs11124930|rs12826964-rs11146929|rs6573971-rs17565772|rs77009508-rs34747443-rs191555775|rs374071816-rs118039278|rs2847344-rs648324|rs9646133-rs11158871|rs35221132-rs10911221|rs4671050-rs2539985|rs267733-rs78132593|rs2256814	http://www.ebi.ac.uk/efo/EFO_0004611	Lipid or lipoprotein measurement	http://www.ebi.ac.uk/efo/EFO_0004732
Prostate cancer	self reported educational attainment	1377	1853	0	20	20	1.5607	5.58e-16	4.97e-14	1.49e-12	0.00623053	0.0123839	0.0730436	rs884108-rs11240230-rs2125855|rs12498981-rs1490612-rs201770780|rs16983844-rs6089946|rs1538247-rs1933264-rs6900159|rs11564693-rs11564708-rs6579000-rs72853903-rs11564709|rs61894507-rs7936656|rs329117-rs6871635|rs4924487-rs6492956|rs71899872-rs12033835-rs111689685-rs4521985|rs2241167-rs1573178|rs11808748-rs11588857|rs10947980-rs912883-rs11758591|rs1793924-rs10783243|rs9902820-rs2526370|rs564601-rs17…	http://www.ebi.ac.uk/efo/EFO_0004784	Other measurement	http://www.ebi.ac.uk/efo/EFO_0001444
Prostate cancer	lipoprotein A measurement	1377	64	1	7	8	0.0539042	1.05e-15	9.08e-14	2.82e-12	0.00558269	0.0111034	0.0281994	rs547176-rs520829-rs10755578|rs6938647-rs6903649|rs2457574-rs2457571|rs12529361-rs9457993|rs614754|rs76000021-rs41267807|rs374071816-rs118039278|rs117408614-rs142126734	http://www.ebi.ac.uk/efo/EFO_0006925	Lipid or lipoprotein measurement	http://www.ebi.ac.uk/efo/EFO_0004732
Prostate cancer	telomere length	1377	33	2	5	7	0.0277944	1.24e-15	1.04e-13	3.32e-12	0.00498931	0.00992908	0.0223126	rs75691080|rs2288050-rs11645286-rs2967374|rs6062298-rs41309367|rs7705526-rs7725218|rs932826-rs932827|rs34978822|rs34547036-rs9419958	http://www.ebi.ac.uk/efo/EFO_0004505	Other measurement	http://www.ebi.ac.uk/efo/EFO_0001444
Prostate cancer	lymphocyte count	1377	198	1	9	10	0.166766	3.05e-15	2.33e-13	8.16e-12	0.00638978	0.0126984	0.0394493	rs202087309-rs546941547-rs2955170|rs4848397-rs150784178-rs144727984|rs112158604-rs11204677|rs4364506-rs6569648|rs2524079|rs11480453-rs4911253|rs1861270-rs6735656|rs10022109-rs35515350|rs1800057-rs117706999|rs6763927-rs7650602	http://www.ebi.ac.uk/efo/EFO_0004587	Hematological measurement	http://www.ebi.ac.uk/efo/EFO_0004503
Prostate cancer	forced expiratory volume	1377	204	1	9	10	0.17182	4.12e-15	3.06e-13	1.1e-11	0.00636537	0.0126502	0.0392986	rs11204677-rs878471-rs41317515|rs12945803|rs6859730-rs10055386|rs4357749-rs972936|rs6062298-rs2256814-rs4809221|rs9911515-rs1558119-rs6501455|rs6678244-rs1416685|rs2999090-rs11391389|rs10007915-rs28633885-rs6533183|rs114544105-rs9368733-rs9273539	http://www.ebi.ac.uk/efo/EFO_0004314	Other measurement	http://www.ebi.ac.uk/efo/EFO_0001444
Prostate cancer	FEV/FEC ratio	1377	745	0	14	14	0.627479	7.89e-15	5.7e-13	2.11e-11	0.00664137	0.0131951	0.0556634	rs34908476-rs16958861|rs2412099-rs4987082|rs1657621-rs55955923|rs339351-rs12201912|rs1558119-rs17765886|rs12945803-rs8071207|rs6678244-rs1416685|rs4234100-rs55659209|rs1244869-rs7313651-rs1795613|rs10007915-rs28633885-rs2007403|rs4321846-rs4364506|rs73235093-rs41271357-rs1027550|rs2999090-rs11391389|rs114544105-rs9368733-rs9273539	http://www.ebi.ac.uk/efo/EFO_0004713	Other measurement	http://www.ebi.ac.uk/efo/EFO_0001444
Prostate cancer	susceptibility to plantar warts measurement	1377	22	0	6	6	0.0185296	2.6e-14	1.83e-12	6.96e-11	0.00430725	0.00857756	0.016835	rs9271378-rs9272226-rs9272050|rs9267257-rs2855811|rs28752534-rs13191810|rs9267853-rs3096702|rs9267548-rs2844463-rs67497292|rs9268804-rs143325653	http://www.ebi.ac.uk/efo/EFO_0008406	Other measurement	http://www.ebi.ac.uk/efo/EFO_0001444
Prostate cancer	lean body mass	1377	163	1	8	9	0.137287	3.31e-14	2.27e-12	8.84e-11	0.00587851	0.0116883	0.0330541	rs112817029-rs8082345|rs76798800-rs3753639-rs2242195|rs78378222|rs7740188-rs4364506|rs1148764-rs3814333|rs6763927-rs724016|rs12785905-rs7952436|rs202087309-rs2955170-rs2726491|rs547176-rs401746	http://www.ebi.ac.uk/efo/EFO_0004995	Other measurement	http://www.ebi.ac.uk/efo/EFO_0001444
Prostate cancer	childhood onset asthma	1377	257	1	9	10	0.216459	4.18e-14	2.79e-12	1.12e-10	0.00615763	0.0122399	0.0380075	rs11412402-rs62271749|rs16896742-rs13203830|rs17220885-rs35449774|rs2999076-rs11391389|rs10239311-rs149317277|rs7625643-rs6763927|rs34853064-rs41268844|rs2428503-rs1117490|rs1893958-rs5825066|rs2855811	NA	NA	NA
Prostate cancer	psoriasis	1377	182	1	8	9	0.15329	9.01e-14	5.73e-12	2.41e-10	0.00580645	0.0115459	0.0326555	rs2394946-rs7773175-rs2524079-rs2249742|rs2306364-rs11227289-rs610037|rs2844624-rs2844626|rs887468-rs3134776-rs1265181|rs2524096-rs9265885|rs3130453-rs9263773|rs2270442-rs6444895|rs2853935-rs2844616|rs2233959	http://www.ebi.ac.uk/efo/EFO_0000676	Immune system disorder	http://www.ebi.ac.uk/efo/EFO_0000540
Prostate cancer	mean platelet volume	1377	299	2	8	10	0.251834	1.89e-13	1.17e-11	5.04e-10	0.0060024	0.0119332	0.0370364	rs74702681-rs7596219|rs9378249-rs35957957|rs2304176-rs148041688|rs2306364-rs11227289-rs2004649|rs4699154-rs723534|rs1716505|rs972578-rs3091364|rs329117-rs10900828|rs4521985-rs2841102-rs2494663|rs2271494	http://www.ebi.ac.uk/efo/EFO_0004584	Hematological measurement	http://www.ebi.ac.uk/efo/EFO_0004503
Prostate cancer	colorectal cancer	1377	132	1	7	8	0.111177	4.17e-13	2.53e-11	1.11e-09	0.00532978	0.010603	0.0270733	rs4724582-rs3801081|rs3131043-rs3130672|rs7758229-rs10755578-rs3105751|rs6983267|rs4546885-rs10911221-rs41475048|rs11097881-rs17035289-rs17035310|rs3787089-rs6062298|rs4919687-rs35756290	http://www.ebi.ac.uk/efo/EFO_0005842	Cancer	http://www.ebi.ac.uk/efo/EFO_0000616
Prostate cancer	estrogen-receptor negative breast cancer	1377	34	0	6	6	0.0286366	4.65e-13	2.76e-11	1.24e-09	0.00427046	0.00850461	0.0169243	rs4245739-rs2125855|rs10069690-rs2242652-rs7725218|rs4364506-rs6569648|rs999737-rs34882439|rs2847344-rs616488|rs2736098-rs3215401	http://www.ebi.ac.uk/efo/EFO_1000650	Cancer	http://www.ebi.ac.uk/efo/EFO_0000616
Prostate cancer	birth weight	1377	234	1	8	9	0.197087	8.7e-13	5.06e-11	2.33e-09	0.00561798	0.0111732	0.0315997	rs329117-rs1981627|rs11689842-rs754868|rs11704481-rs6006989|rs78378222|rs564601-rs57414412|rs76094073-rs2038542|rs905938-rs3753639-rs2242195|rs72851023-rs11564709|rs10007915-rs28633885-rs6533183	http://www.ebi.ac.uk/efo/EFO_0004344	Body measurement	http://www.ebi.ac.uk/efo/EFO_0004324
Prostate cancer	membranous glomerulonephritis	1377	16	0	5	5	0.0134761	1.82e-12	1.02e-10	4.88e-09	0.00360231	0.00717875	0.0121414	rs3115663-rs3132451|rs3134792-rs2233974|rs887468-rs1265159-rs3134776|rs3130977-rs3130564|rs204999-rs3096697	http://www.ebi.ac.uk/efo/EFO_0004254	Other disease	http://www.ebi.ac.uk/efo/EFO_0000408
Prostate cancer	C-reactive protein measurement	1377	571	0	11	11	0.480927	4.53e-12	2.47e-10	1.21e-08	0.00567888	0.0112936	0.0380543	rs150543164-rs1131114|rs2412099-rs11655704-rs12601665|rs12950320-rs7213269-rs68100606|rs114430970-rs34415150-rs9271726|rs6062298-rs1056441-rs2256814|rs1538247-rs9383643|rs4364506-rs9388766|rs11128901-rs336620|rs380825-rs6919121|rs13072540-rs35650976|rs2306364-rs11227289-rs6591188	http://www.ebi.ac.uk/efo/EFO_0004458	Inflammatory measurement	http://www.ebi.ac.uk/efo/EFO_0004872
Prostate cancer	central nervous system cancer	1377	20	0	5	5	0.0168451	6.46e-12	3.38e-10	1.73e-08	0.00359195	0.0071582	0.0122334	rs6010620-rs6062298-rs201497780-rs2256814|rs3761121-rs4809324|rs2736100-rs10069690-rs2242652-rs7725218|rs78378222-rs35850753|rs7712562-rs2853676	http://www.ebi.ac.uk/efo/EFO_0000326	Cancer	http://www.ebi.ac.uk/efo/EFO_0000616
Prostate cancer	non-small cell lung carcinoma	1377	20	1	4	5	0.0168451	6.46e-12	3.38e-10	1.73e-08	0.00359195	0.0071582	0.0122334	rs13167280|rs7705526-rs7725218|rs1861270-rs3769821|rs1611136-rs2517873|rs401681-rs2735948	http://www.ebi.ac.uk/efo/EFO_0003060	Cancer	http://www.ebi.ac.uk/efo/EFO_0000616
Prostate cancer	Eczema	1377	189	0	8	8	0.159186	7.54e-12	3.82e-10	2.01e-08	0.00513479	0.0102171	0.0261103	rs2412099-rs12185242|rs2244524-rs10786678-rs7899004|rs6062298-rs6062486|rs3730775-rs5825066|rs2256814-rs6089970|rs11213941-rs564601|rs1870940-rs3753639-rs2242195|rs6785012-rs6763927	http://purl.obolibrary.org/obo/HP_0000964	Other trait	http://www.ebi.ac.uk/efo/EFO_0000001
Prostate cancer	appendicular lean mass	1377	435	1	9	10	0.36638	7.58e-12	3.82e-10	2.03e-08	0.00554939	0.0110375	0.0341899	rs76798800-rs3753639-rs2242195|rs2412099-rs4987082|rs78378222|rs28613067-rs79278236|rs146564277-rs77548871|rs708723-rs1172198-rs34305872|rs4364506-rs7740107|rs6763927-rs724016|rs10007915-rs2726519-rs28633885|rs9568448-rs35073217	http://www.ebi.ac.uk/efo/EFO_0004980	Other measurement	http://www.ebi.ac.uk/efo/EFO_0001444
Prostate cancer	intelligence	1377	675	0	11	11	0.568521	2.68e-11	1.32e-09	7.15e-08	0.00538952	0.0107212	0.036063	rs11808748-rs11588857|rs10007915-rs28633885-rs2466920|rs6914699-rs16896742|rs13395129-rs10198990-rs72821624|rs2647249-rs35515350|rs1264377-rs3129977|rs2526370-rs6503863|rs2428503-rs2189373|rs11622558-rs7154611|rs202087309-rs2955170-rs2726491|rs71899872-rs112780312-rs111689685-rs4521985	http://www.ebi.ac.uk/efo/EFO_0004337	Biological process	http://purl.obolibrary.org/obo/GO_0008150
Prostate cancer	neutrophil percentage of leukocytes	1377	135	0	7	7	0.113704	3.73e-11	1.81e-09	9.98e-08	0.00465116	0.00925926	0.0211615	rs202087309-rs546941547-rs2955170|rs2659698-rs2713579|rs1861270-rs1035142|rs11704314-rs5757906|rs2523621-rs887468-rs2256752|rs11800059-rs11204677|rs7734992-rs7725218	http://www.ebi.ac.uk/efo/EFO_0007990	Hematological measurement	http://www.ebi.ac.uk/efo/EFO_0004503
Prostate cancer	uterine fibroid	1377	70	1	5	6	0.0589577	4.42e-11	2.11e-09	1.18e-07	0.00416377	0.00829302	0.0166904	rs72709458-rs2242652-rs7725218|rs1800057-rs149934734|rs78378222|rs7712562-rs2853676|rs4699299-rs12510147|rs34547036-rs9419958	http://www.ebi.ac.uk/efo/EFO_0000731	Cancer	http://www.ebi.ac.uk/efo/EFO_0000616
Prostate cancer	platelet count	1377	370	1	8	9	0.311634	5.14e-11	2.41e-09	1.37e-07	0.00517837	0.0103034	0.0291044	rs928391-rs2768765|rs4699154-rs723534|rs2736100-rs7725218|rs34323602-rs12608697-rs12610267-rs148041688|rs1716505|rs2306364-rs2448490|rs8137128-rs3091364|rs399604-rs396090|rs16896742-rs2975009	http://www.ebi.ac.uk/efo/EFO_0004309	Hematological measurement	http://www.ebi.ac.uk/efo/EFO_0004503
Prostate cancer	smoking initiation	1377	241	0	8	8	0.202983	5.24e-11	2.41e-09	1.4e-07	0.00496894	0.00988875	0.0252728	rs13021322-rs7559982|rs6062298-rs6062498-rs2256814|rs12775431-rs35756290|rs329117-rs329118|rs9281573-rs15574|rs4678-rs1264377-rs1264322|rs1883730-rs11480453|rs34106060-rs2553041-rs79036893	http://www.ebi.ac.uk/efo/EFO_0005670	Biological process	http://purl.obolibrary.org/obo/GO_0008150
Prostate cancer	age at menarche	1377	378	1	8	9	0.318372	6.21e-11	2.81e-09	1.66e-07	0.00515464	0.0102564	0.0289692	rs16896742|rs11039266-rs10838703|rs17035310-rs143875052|rs708723-rs951366|rs2919290-rs12769682|rs9681954-rs9834197|rs1860826-rs4721134|rs3849531-rs9847576|rs9281573-rs707938	http://www.ebi.ac.uk/efo/EFO_0004703	Other measurement	http://www.ebi.ac.uk/efo/EFO_0001444
Prostate cancer	keratinocyte carcinoma	1377	78	1	5	6	0.0656958	8.61e-11	3.84e-09	2.3e-07	0.00414079	0.00824742	0.0166158	rs72702561-rs144984465|rs700755-rs4724578|rs78378222|rs1861270-rs6743068|rs1870940-rs3753639-rs2242195|rs421284-rs2735948	http://www.ebi.ac.uk/efo/EFO_0010176	Cancer	http://www.ebi.ac.uk/efo/EFO_0000616
Prostate cancer	apolipoprotein B measurement	1377	261	1	7	8	0.219828	9.85e-11	4.32e-09	2.63e-07	0.00490798	0.00976801	0.0249628	rs12197047-rs4364506|rs12990177-rs1038822-rs11124930|rs36043200-rs569426962|rs374071816-rs118039278|rs4671050-rs2539985|rs2256814|rs112758337-rs10953258-rs74672857|rs34767236-rs17565772	http://www.ebi.ac.uk/efo/EFO_0004615	Lipid or lipoprotein measurement	http://www.ebi.ac.uk/efo/EFO_0004732
Prostate cancer	chronotype measurement	1377	591	0	10	10	0.497772	1.48e-10	6.4e-09	3.97e-07	0.00510725	0.0101626	0.0314086	rs8182491-rs61088131-rs117647783|rs9369298-rs10947980-rs2842638|rs7524620-rs11204677|rs612720-rs510326|rs6007594-rs6006989|rs11697690-rs11480453|rs35653190-rs17619103|rs12206814-rs11758591|rs9611302-rs145571764-rs116878828|rs267733-rs78132593-rs2055975	http://www.ebi.ac.uk/efo/EFO_0008328	Other measurement	http://www.ebi.ac.uk/efo/EFO_0001444
Prostate cancer	pulse pressure measurement	1377	595	1	9	10	0.501141	1.58e-10	6.72e-09	4.23e-07	0.00509684	0.010142	0.0313432	rs7125498-rs7118260|rs4977492-rs77574378-rs1048169-rs28510837|rs78378222|rs547176-rs555754-rs10755578|rs11585169-rs11204677|rs7927515-rs7936656|rs16987961-rs9306894-rs7255|rs12666259-rs2023843|rs2510787-rs12511169-rs12510147|rs4699165-rs202087309-rs2955170	http://www.ebi.ac.uk/efo/EFO_0005763	Cardiovascular measurement	http://www.ebi.ac.uk/efo/EFO_0004298
Prostate cancer	hypertension	1377	101	0	6	6	0.0850676	4.18e-10	1.75e-08	1.12e-06	0.00407609	0.00811908	0.0163894	rs11666569-rs8101673|rs1859168-rs12666259|rs9281573-rs805303|rs2524095-rs2844616|rs34547036-rs4387287|rs10838703-rs2293579	http://www.ebi.ac.uk/efo/EFO_0000537	Cardiovascular disease	http://www.ebi.ac.uk/efo/EFO_0000319
Prostate cancer	body fat distribution	1377	104	0	6	6	0.0875943	4.99e-10	2.05e-08	1.33e-06	0.0040678	0.00810263	0.0163593	rs12785905-rs552846225|rs6763927-rs9853018|rs10239311-rs3823974|rs10838703-rs10769282|rs1148764-rs5779197|rs2412099-rs28394864	http://www.ebi.ac.uk/efo/EFO_0004341	Body measurement	http://www.ebi.ac.uk/efo/EFO_0004324
Prostate cancer	cathepsin S measurement	1377	3	0	3	3	0.00252676	5.96e-10	2.41e-08	1.59e-06	0.00217865	0.00434783	0.0043573	rs78132593-rs267738|rs1336900-rs11204677|rs72702561-rs41271951	http://www.ebi.ac.uk/efo/EFO_0008073	Other measurement	http://www.ebi.ac.uk/efo/EFO_0001444
Prostate cancer	chronic obstructive pulmonary disease	1377	112	0	6	6	0.0943324	7.83e-10	3.12e-08	2.09e-06	0.00404585	0.0080591	0.0162784	rs10239311-rs2040732|rs10007915-rs2047409-rs28633885|rs1558119-rs11655567|rs6763927-rs7650602|rs2955083-rs11391389|rs339351-rs674621	http://www.ebi.ac.uk/efo/EFO_0000341	Other disease	http://www.ebi.ac.uk/efo/EFO_0000408
Prostate cancer	diet measurement	1377	209	1	6	7	0.176031	7.97e-10	3.13e-08	2.13e-06	0.00443319	0.00882724	0.0201954	rs61088131-rs117647783-rs12232804|rs58235267|rs564601-rs34634095|rs6690619-rs2841102|rs11480453-rs1007122|rs45501495-rs11808748|rs1611136-rs3117318	http://www.ebi.ac.uk/efo/EFO_0008111	Other measurement	http://www.ebi.ac.uk/efo/EFO_0001444
Prostate cancer	renal cell carcinoma	1377	18	0	4	4	0.0151606	1.52e-09	5.8e-08	4.06e-06	0.00287563	0.00573477	0.00835672	rs1800057-rs74911261|rs4871844-rs2241261|rs6678244-rs4381241|rs11813268-rs34547036	http://www.ebi.ac.uk/efo/EFO_0000681	Cancer	http://www.ebi.ac.uk/efo/EFO_0000616
Prostate cancer	smoking status measurement	1377	758	0	10	10	0.638428	1.6e-09	6.03e-08	4.28e-06	0.00470588	0.00936768	0.0288882	rs66531832-rs59507033|rs28408682-rs2244524-rs10786678|rs11480453-rs6087988|rs708723-rs823099-rs1172198|rs35756290-rs12244388|rs12941683-rs9912317|rs1898025-rs2196356-rs6763648|rs62180324-rs2553041-rs34106060|rs1799068-rs3847055-rs1039057-rs6465657|rs329117-rs329124	http://www.ebi.ac.uk/efo/EFO_0006527	Other measurement	http://www.ebi.ac.uk/efo/EFO_0001444
Prostate cancer	red blood cell distribution width	1377	768	0	10	10	0.646851	1.81e-09	6.74e-08	4.85e-06	0.00468384	0.00932401	0.0287499	rs2955088-rs11391389|rs12145743-rs2768765|rs9267096-rs2523696|rs569426962-rs4794048|rs9469899-rs112283401|rs75630086-rs71595003|rs17408037-rs79891622|rs12785905-rs76335321|rs6731005-rs2028900-rs62164837|rs2942219-rs2942194-rs10099421	http://www.ebi.ac.uk/efo/EFO_0005192	Hematological measurement	http://www.ebi.ac.uk/efo/EFO_0004503
Prostate cancer	schizophrenia	1377	382	0	8	8	0.321741	1.96e-09	7.19e-08	5.25e-06	0.00456882	0.00909608	0.0232273	rs2428503-rs2523722|rs2596500-rs2233974|rs77296290-rs9368733-rs9273539|rs4721134-rs58120505|rs72702561-rs72700829|rs35756290-rs11191424|rs3116807-rs385492|rs73058052-rs56873913-rs7508148	NA	NA	NA
Prostate cancer	waist circumference	1377	64	0	5	5	0.0539042	3.08e-09	1.08e-07	8.23e-06	0.00348189	0.00693962	0.0121606	rs547176-rs368123|rs10838703-rs2293576|rs6163-rs35756290|rs1062070-rs204999|rs6763927-rs6440003	http://www.ebi.ac.uk/efo/EFO_0004342	Body measurement	http://www.ebi.ac.uk/efo/EFO_0004324
Prostate cancer	alcohol consumption measurement	1377	261	0	7	7	0.219828	3.71e-09	1.29e-07	9.92e-06	0.00429184	0.00854701	0.0195559	rs2011092-rs6763927|rs10838703-rs11039364|rs13032049-rs2539985|rs12673949-rs1111647|rs117647783-rs8106871|rs708723-rs1172198-rs823114|rs11214775-rs1713675	http://www.ebi.ac.uk/efo/EFO_0007878	Other measurement	http://www.ebi.ac.uk/efo/EFO_0001444
Prostate cancer	type I diabetes mellitus	1377	71	1	4	5	0.0598	5.23e-09	1.77e-07	1.4e-05	0.003465	0.00690608	0.0121147	rs9268804-rs9268645|rs17885785-rs689|rs9268853-rs9271726|rs72853903|rs7111341-rs11564693-rs6579000	NA	NA	NA
Prostate cancer	melanoma	1377	25	0	4	4	0.0210563	6.25e-09	2.08e-07	1.67e-05	0.00286123	0.00570613	0.0084049	rs401681-rs2735948|rs34547036-rs2995264|rs1861270-rs13016963|rs7532008-rs11204677-rs7412746	http://www.ebi.ac.uk/efo/EFO_0000756	Cancer	http://www.ebi.ac.uk/efo/EFO_0000616
Prostate cancer	hair colour measurement	1377	444	1	7	8	0.37396	6.31e-09	2.08e-07	1.69e-05	0.00441258	0.00878638	0.0224247	rs55955923-rs453699|rs4364506-rs6569648|rs72930621-rs72917317|rs17804499|rs6763927-rs1344672|rs6544650-rs4608575|rs329117-rs67672984|rs56040001-rs34345560	http://www.ebi.ac.uk/efo/EFO_0007822	Other measurement	http://www.ebi.ac.uk/efo/EFO_0001444
Prostate cancer	polycystic ovary syndrome	1377	26	0	4	4	0.0218986	7.38e-09	2.38e-07	1.97e-05	0.00285919	0.00570207	0.00840778	rs853854-rs11480453|rs12478601-rs6721158-rs1038822-rs11124930|rs2215401-rs6022786-rs6126986|rs13429458-rs72613901	http://www.ebi.ac.uk/efo/EFO_0000660	Other disease	http://www.ebi.ac.uk/efo/EFO_0000408
Prostate cancer	hip circumference	1377	77	0	5	5	0.0648535	7.91e-09	2.52e-07	2.11e-05	0.00345066	0.00687758	0.0120737	rs10838703-rs2293576|rs6163-rs35756290|rs4364506-rs6569648|rs3132947-rs204999|rs6763927-rs7632381	http://www.ebi.ac.uk/efo/EFO_0005093	Body measurement	http://www.ebi.ac.uk/efo/EFO_0004324
Prostate cancer	MHC class I polypeptide-related sequence A measurement	1377	29	0	4	4	0.0244253	1.17e-08	3.64e-07	3.13e-05	0.00285307	0.0056899	0.0084127	rs3869132-rs3128980|rs2524280-rs35957957|rs28367631-rs28367685|rs3134942-rs3132451	http://www.ebi.ac.uk/efo/EFO_0008233	Other measurement	http://www.ebi.ac.uk/efo/EFO_0001444
Prostate cancer	glioblastoma multiforme	1377	7	0	3	3	0.00589577	2.08e-08	6.32e-07	5.56e-05	0.00217234	0.00433526	0.00497977	rs78378222-rs35850753|rs6062302-rs6062298-rs201497780-rs2256814|rs72709458-rs2242652-rs7725218	http://www.ebi.ac.uk/efo/EFO_0000519	Cancer	http://www.ebi.ac.uk/efo/EFO_0000616
Prostate cancer	BMI-adjusted hip circumference	1377	99	0	5	5	0.0833831	2.82e-08	8.46e-07	7.53e-05	0.00339905	0.00677507	0.0119164	rs4364506-rs9388766|rs10804591-rs2048622|rs7727562-rs6556079|rs6763927-rs724016|rs1148764-rs1046934	http://www.ebi.ac.uk/efo/EFO_0008039	Body measurement	http://www.ebi.ac.uk/efo/EFO_0004324
Prostate cancer	mean arterial pressure	1377	102	0	5	5	0.0859098	3.28e-08	9.62e-07	8.75e-05	0.00339213	0.00676133	0.0118945	rs114439111-rs4726459|rs6993325-rs6984769|rs1379281-rs11666569|rs12416687-rs35756290|rs4722675-rs12666259	http://www.ebi.ac.uk/efo/EFO_0006340	Other measurement	http://www.ebi.ac.uk/efo/EFO_0001444
Prostate cancer	urinary albumin to creatinine ratio	1377	102	0	5	5	0.0859098	3.28e-08	9.62e-07	8.75e-05	0.00339213	0.00676133	0.0118945	rs2760995-rs147599819|rs7587923-rs12714144|rs112976982-rs112607182|rs12666259-rs2023843|rs932826-rs147522398-rs11697610	http://www.ebi.ac.uk/efo/EFO_0007778	Other measurement	http://www.ebi.ac.uk/efo/EFO_0001444
Prostate cancer	hemoglobin measurement	1377	374	0	7	7	0.315003	4.34e-08	1.25e-06	0.00011613	0.00401376	0.00799543	0.0182865	rs10885-rs3132451|rs3132580-rs1264377-rs4678|rs75066758-rs11245450|rs4364506-rs9388768|rs3745473-rs73058052|rs284860-rs35756290|rs6763927-rs9853018	http://www.ebi.ac.uk/efo/EFO_0004509	Hematological measurement	http://www.ebi.ac.uk/efo/EFO_0004503
Prostate cancer	monocyte percentage of leukocytes	1377	235	1	5	6	0.19793	6.57e-08	1.87e-06	0.000175657	0.00373599	0.00744417	0.0150703	rs138177673-rs47340|rs10885396-rs7094871|rs11691517-rs6734942|rs2241167-rs10739695|rs11204677|rs708723-rs823143-rs1172198	http://www.ebi.ac.uk/efo/EFO_0007989	Hematological measurement	http://www.ebi.ac.uk/efo/EFO_0004503
Prostate cancer	risky sexual behaviour measurement	1377	118	1	4	5	0.0993859	6.8e-08	1.91e-06	0.000181849	0.00335571	0.00668896	0.011777	rs13021322|rs10950415-rs4721134|rs2647256-rs35515350|rs4357749-rs59660079|rs79766835-rs12613959	http://www.ebi.ac.uk/efo/EFO_0007877	Other measurement	http://www.ebi.ac.uk/efo/EFO_0001444
Prostate cancer	total cholesterol measurement	1377	416	0	7	7	0.350377	8.93e-08	2.49e-06	0.000238598	0.00391937	0.00780814	0.017854	rs8078686-rs569426962|rs58235267-rs2710642-rs2539985|rs374071816-rs10455872|rs77009508-rs34747443-rs191555775|rs6058893-rs11480453|rs2847344-rs648324|rs4651135-rs10911221	http://www.ebi.ac.uk/efo/EFO_0004574	Lipid or lipoprotein measurement	http://www.ebi.ac.uk/efo/EFO_0004732
Prostate cancer	nodular sclerosis Hodgkin lymphoma	1377	11	1	2	3	0.00926479	9.79e-08	2.64e-06	0.000261622	0.00216607	0.00432277	0.00513717	rs17212846-rs147599819-rs2858870|rs204999|rs9268804-rs9268528	http://www.ebi.ac.uk/efo/EFO_0004708	Cancer	http://www.ebi.ac.uk/efo/EFO_0000616
Prostate cancer	glioma	1377	11	1	2	3	0.00926479	9.79e-08	2.64e-06	0.000261622	0.00216607	0.00432277	0.00513717	rs2736100-rs10069690-rs2242652-rs7725218|rs2297440-rs6062298-rs201497780-rs2256814|rs78378222	http://www.ebi.ac.uk/efo/EFO_0005543	Cancer	http://www.ebi.ac.uk/efo/EFO_0000616
Prostate cancer	cognitive function measurement	1377	644	0	8	8	0.542411	1.09e-07	2.91e-06	0.000290558	0.00397417	0.00791687	0.0201706	rs11808748-rs3747631|rs17369215-rs145380596-rs4947236|rs9902820-rs2526370|rs2726513-rs202087309-rs2955170|rs35539723-rs7154611|rs6509441-rs73058052|rs9281573-rs707938|rs71899872-rs112780312-rs111689685-rs4521985	http://www.ebi.ac.uk/efo/EFO_0008354	Other measurement	http://www.ebi.ac.uk/efo/EFO_0001444
Prostate cancer	Testicular Germ Cell Tumor	1377	55	0	4	4	0.0463239	1.65e-07	4.37e-06	0.000441394	0.00280112	0.00558659	0.00835118	rs2270442-rs3755605|rs80326387-rs11071896|rs2736100-rs7725218|rs4721134-rs12699477	http://www.ebi.ac.uk/efo/EFO_1000566	Cancer	http://www.ebi.ac.uk/efo/EFO_0000616
Prostate cancer	complement C4 measurement	1377	13	0	3	3	0.0109493	1.69e-07	4.44e-06	0.000452907	0.00216294	0.00431655	0.0051755	rs2894053-rs1634718|rs67497292-rs2075799|rs805273-rs2844463	http://www.ebi.ac.uk/efo/EFO_0004984	Other measurement	http://www.ebi.ac.uk/efo/EFO_0001444
Prostate cancer	allergy	1377	145	0	5	5	0.122127	1.9e-07	4.93e-06	0.000508129	0.00329598	0.0065703	0.0115787	rs10883723-rs10786678-rs112325593-rs2253950|rs16896742-rs9259819|rs564601-rs7130753|rs6011033-rs6062298-rs201497780-rs2256814|rs10239311-rs10486391	NA	NA	NA
Prostate cancer	lymphocyte percentage of leukocytes	1377	147	0	5	5	0.123811	2.03e-07	5.19e-06	0.000543914	0.00329164	0.00656168	0.0115641	rs202087309-rs546941547-rs2955170|rs2659698-rs2713579|rs11480453-rs1040555|rs6763927-rs7650602|rs1861270-rs6743068	http://www.ebi.ac.uk/efo/EFO_0007993	Hematological measurement	http://www.ebi.ac.uk/efo/EFO_0004503
Prostate cancer	cardiovascular disease	1377	285	0	6	6	0.240042	2.04e-07	5.19e-06	0.000545387	0.00362319	0.00722022	0.0146182	rs564601-rs12363917|rs11709060-rs11720784|rs11666569-rs7246865|rs114439111-rs28656273|rs3735533-rs12666259|rs11767188-rs1111647	http://www.ebi.ac.uk/efo/EFO_0000319	Other disease	http://www.ebi.ac.uk/efo/EFO_0000408
Prostate cancer	grip strength measurement	1377	149	1	4	5	0.125496	2.18e-07	5.49e-06	0.000581666	0.00328731	0.00655308	0.0115496	rs9469899|rs329117-rs329120|rs11039266-rs10838703|rs114430970-rs9271726-rs2760975|rs2847344-rs6687430	http://www.ebi.ac.uk/efo/EFO_0006941	Other measurement	http://www.ebi.ac.uk/efo/EFO_0001444
Prostate cancer	brain volume measurement	1377	486	0	7	7	0.409335	2.54e-07	6.34e-06	0.000678375	0.00377155	0.00751476	0.0171757	rs7361098-rs6062298-rs201497780-rs2256814|rs147647466-rs6678244|rs10838703-rs7934481|rs11242218-rs329117|rs71899872-rs111689685-rs113689298-rs6672856-rs4521985|rs4357749-rs7971939|rs6097618-rs2215401-rs6126986	http://www.ebi.ac.uk/efo/EFO_0006930	Other measurement	http://www.ebi.ac.uk/efo/EFO_0001444
Prostate cancer	neurofibrillary tangles measurement	1377	1069	0	9	9	0.900369	4.56e-07	1.13e-05	0.00121767	0.00369307	0.00735895	0.0206406	rs4857906-rs6803892-rs7433900|rs144947706-rs4530903|rs2575793-rs2660745|rs1364599-rs1255293|rs10744813-rs1882111|rs6744642-rs7595299|rs10956333-rs1972123|rs3129878-rs3129859|rs13272473-rs13276054	http://www.ebi.ac.uk/efo/EFO_0006797	Other measurement	http://www.ebi.ac.uk/efo/EFO_0001444
Prostate cancer	ovarian serous carcinoma	1377	19	0	3	3	0.0160028	5.72e-07	1.39e-05	0.00152871	0.00215363	0.00429799	0.00523228	rs7207826-rs12945803|rs7705526-rs10069690-rs2242652-rs7725218|rs7902587-rs34547036	http://www.ebi.ac.uk/efo/EFO_1001516	Cancer	http://www.ebi.ac.uk/efo/EFO_0000616
Prostate cancer	idiopathic pulmonary fibrosis	1377	19	1	2	3	0.0160028	5.72e-07	1.39e-05	0.00152871	0.00215363	0.00429799	0.00523228	rs1881966-rs12696304|rs7725218|rs4721134-rs12699415	http://www.ebi.ac.uk/efo/EFO_0000768	Cancer	http://www.ebi.ac.uk/efo/EFO_0000616
Prostate cancer	Agents acting on the renin-angiotensin system use measurement	1377	184	0	5	5	0.154975	6.18e-07	1.49e-05	0.0016515	0.00321337	0.00640615	0.0112979	rs10838703-rs2856653|rs11666569-rs7246865|rs564601-rs4459340|rs3735533-rs12666259|rs374071816-rs55730499	http://www.ebi.ac.uk/efo/EFO_0009931	Other measurement	http://www.ebi.ac.uk/efo/EFO_0001444
Prostate cancer	atopic asthma	1377	197	0	5	5	0.165924	8.65e-07	2.04e-05	0.00231083	0.00318674	0.00635324	0.0112064	rs17220885-rs35449774|rs3997868-rs9271726|rs3132954-rs6913664|rs16896742-rs4947236-rs2517690|rs11751024-rs13191810	http://www.ebi.ac.uk/efo/EFO_0010638	Other disease	http://www.ebi.ac.uk/efo/EFO_0000408
Prostate cancer	peak expiratory flow	1377	90	0	4	4	0.0758028	1.21e-06	2.83e-05	0.00323019	0.00273411	0.00545331	0.00818934	rs9911515-rs1558119-rs6501455|rs6678244-rs1416685|rs4357749-rs972936|rs10007915-rs28633885-rs6533183	http://www.ebi.ac.uk/efo/EFO_0009718	Other measurement	http://www.ebi.ac.uk/efo/EFO_0001444
Prostate cancer	granulocyte percentage of myeloid white cells	1377	218	1	4	5	0.183611	1.42e-06	3.3e-05	0.00379769	0.00314465	0.00626959	0.011061	rs2241167-rs10739694|rs11691517-rs6734942|rs10885396-rs7094871|rs11204677|rs4639377-rs9272544	http://www.ebi.ac.uk/efo/EFO_0007997	Hematological measurement	http://www.ebi.ac.uk/efo/EFO_0004503
Prostate cancer	susceptibility to shingles measurement	1377	27	0	3	3	0.0227408	1.72e-06	3.92e-05	0.00459133	0.00214133	0.0042735	0.00525281	rs145380596-rs9380159|rs16896742-rs2523815|rs9268804-rs9268557	http://www.ebi.ac.uk/efo/EFO_0008401	Other measurement	http://www.ebi.ac.uk/efo/EFO_0001444
Prostate cancer	pancreatic carcinoma	1377	28	1	2	3	0.0235831	1.92e-06	4.36e-05	0.00513905	0.0021398	0.00427046	0.00525333	rs2736098|rs401681-rs2735948|rs34994199-rs17621345-rs17688601	http://www.ebi.ac.uk/efo/EFO_0002618	Cancer	http://www.ebi.ac.uk/efo/EFO_0000616
Prostate cancer	lung adenocarcinoma	1377	30	0	3	3	0.0252676	2.38e-06	5.3e-05	0.00636089	0.00213675	0.00426439	0.00525352	rs11591710-rs34547036|rs7705526-rs7725218|rs31489-rs2735948	http://www.ebi.ac.uk/efo/EFO_0000571	Cancer	http://www.ebi.ac.uk/efo/EFO_0000616
Prostate cancer	household income	1377	247	0	5	5	0.208037	2.61e-06	5.77e-05	0.00698748	0.00308833	0.00615763	0.0108654	rs12498981-rs201770780-rs78280128|rs329117-rs329120|rs11808748-rs11588857|rs10007915-rs28633885-rs2466920|rs564601-rs17565975	http://www.ebi.ac.uk/efo/EFO_0009695	Other trait	http://www.ebi.ac.uk/efo/EFO_0000001
Prostate cancer	Alopecia	1377	262	0	5	5	0.22067	3.48e-06	7.63e-05	0.00930735	0.00305998	0.00610128	0.0107666	rs12509636-rs72617743|rs7823049-rs34657911|rs10888690-rs6678244|rs6763927-rs6440008|rs6732426-rs4608575	http://www.orpha.net/ORDO/Orphanet_79364	NR	NR
Prostate cancer	monocyte count	1377	269	0	5	5	0.226566	3.96e-06	8.6e-05	0.010578	0.00304692	0.00607533	0.010721	rs11691517-rs6734942|rs9404937-rs9461680-rs28367685-rs28749551|rs47340-rs138918|rs117647783-rs35493131|rs708723-rs1172198-rs708727	http://www.ebi.ac.uk/efo/EFO_0005091	Hematological measurement	http://www.ebi.ac.uk/efo/EFO_0004503
Prostate cancer	platelet crit	1377	272	0	5	5	0.229093	4.18e-06	9e-05	0.0111624	0.00304136	0.00606428	0.0107016	rs7253820-rs1036233-rs12610267|rs201497780-rs3787096-rs6062298|rs1861270-rs6712091|rs7705526-rs7725218|rs11264531-rs2768765	http://www.ebi.ac.uk/efo/EFO_0007985	Hematological measurement	http://www.ebi.ac.uk/efo/EFO_0004503
Prostate cancer	cutaneous lupus erythematosus	1377	4	0	2	2	0.00336901	4.25e-06	9.01e-05	0.0113562	0.00145033	0.00289645	0.00254176	rs1264377-rs3131060|rs3130977-rs3130564	http://www.ebi.ac.uk/efo/EFO_0003834	Immune system disorder	http://www.ebi.ac.uk/efo/EFO_0000540
Prostate cancer	social interaction measurement	1377	39	0	3	3	0.0328479	5.33e-06	0.000111229	0.0142374	0.00212314	0.00423729	0.00524464	rs6545977-rs58235267|rs11808748-rs3747630|rs202087309-rs2726478-rs2955170	http://www.ebi.ac.uk/efo/EFO_0009592	Other measurement	http://www.ebi.ac.uk/efo/EFO_0001444
Prostate cancer	Parkinson's disease	1377	135	0	4	4	0.113704	6.07e-06	0.000125827	0.0162317	0.00265252	0.005291	0.00796337	rs11610045-rs11146929|rs145380596-rs9261484|rs112485576-rs114430970-rs9272226-rs9271726|rs708723-rs823118-rs1172198	NA	NA	NA
Prostate cancer	health study participation	1377	41	0	3	3	0.0345324	6.21e-06	0.00012661	0.016586	0.00212014	0.00423131	0.00524121	rs202087309-rs57692580-rs2955170|rs56058331-rs2526370|rs329117-rs329124	http://www.ebi.ac.uk/efo/EFO_0010130	Other trait	http://www.ebi.ac.uk/efo/EFO_0000001
Prostate cancer	systemic scleroderma	1377	41	0	3	3	0.0345324	6.21e-06	0.00012661	0.016586	0.00212014	0.00423131	0.00524121	rs17220885-rs987870|rs443198-rs204999|rs2844626-rs3130573-rs887467	http://www.ebi.ac.uk/efo/EFO_0000717	Immune system disorder	http://www.ebi.ac.uk/efo/EFO_0000540
Prostate cancer	granulocyte count	1377	155	1	3	4	0.130549	1.05e-05	0.000205498	0.0279944	0.0026178	0.00522193	0.00786358	rs10007915-rs7679673|rs7705526-rs7725218|rs2524079|rs834603-rs4724578	http://www.ebi.ac.uk/efo/EFO_0007987	Hematological measurement	http://www.ebi.ac.uk/efo/EFO_0004503
Prostate cancer	lymphoma	1377	6	0	2	2	0.00505352	1.06e-05	0.000205498	0.0283587	0.00144823	0.00289226	0.00265925	rs144947706-rs4530903|rs9268853-rs9271726	http://www.ebi.ac.uk/efo/EFO_0000574	Cancer	http://www.ebi.ac.uk/efo/EFO_0000616
Prostate cancer	myeloid white cell count	1377	164	0	4	4	0.13813	1.31e-05	0.000251435	0.0349495	0.00260247	0.00519143	0.00781912	rs10007915-rs7679673|rs7705526-rs7725218|rs2394946-rs2524079-rs2249742|rs834603-rs4724578	http://www.ebi.ac.uk/efo/EFO_0007988	Hematological measurement	http://www.ebi.ac.uk/efo/EFO_0004503
Prostate cancer	chronic lymphocytic leukemia	1377	53	0	3	3	0.0446394	1.35e-05	0.000256556	0.0361744	0.00210231	0.0041958	0.00521453	rs7558911-rs7588895|rs6905775-rs9273363|rs7705526-rs7725218	http://www.ebi.ac.uk/efo/EFO_0000095	Cancer	http://www.ebi.ac.uk/efo/EFO_0000616
Prostate cancer	parental longevity	1377	53	0	3	3	0.0446394	1.35e-05	0.000256556	0.0361744	0.00210231	0.0041958	0.00521453	rs374071816-rs10455872|rs887468-rs3130507-rs3134776|rs28383322-rs147599819	http://www.ebi.ac.uk/efo/EFO_0007796	Other measurement	http://www.ebi.ac.uk/efo/EFO_0001444
Prostate cancer	lung carcinoma	1377	54	0	3	3	0.0454817	1.43e-05	0.000269565	0.0382783	0.00210084	0.00419287	0.00521197	rs2736100-rs7725218|rs9271726-rs2395185|rs380286-rs2735948	http://www.ebi.ac.uk/efo/EFO_0001071	Cancer	http://www.ebi.ac.uk/efo/EFO_0000616
Prostate cancer	hepatocellular carcinoma	1377	7	0	2	2	0.00589577	1.48e-05	0.000277482	0.0396799	0.00144718	0.00289017	0.00269192	rs2596542-rs2844542|rs9272226-rs9272105	http://www.ebi.ac.uk/efo/EFO_0000182	Cancer	http://www.ebi.ac.uk/efo/EFO_0000616
Prostate cancer	mosaic loss of chromosome Y measurement	1377	55	1	2	3	0.0463239	1.51e-05	0.00028098	0.0404612	0.00209937	0.00418994	0.00520938	rs4721134-rs4721217|rs3735529-rs886340-rs35355140|rs78378222	http://www.ebi.ac.uk/efo/EFO_0007783	Other measurement	http://www.ebi.ac.uk/efo/EFO_0001444
Prostate cancer	neutrophil count	1377	171	1	3	4	0.144025	1.54e-05	0.000283993	0.041179	0.00259067	0.00516796	0.00778476	rs10007915-rs7679673|rs7705526-rs7725218|rs2524079|rs834603-rs4724578	http://www.ebi.ac.uk/efo/EFO_0004833	Hematological measurement	http://www.ebi.ac.uk/efo/EFO_0004503
Prostate cancer	tonsillectomy risk measurement	1377	57	0	3	3	0.0480084	1.69e-05	0.000308697	0.0450698	0.00209644	0.0041841	0.00520409	rs41298830-rs1978060|rs6833742-rs2726481-rs202087309-rs2955170|rs10007915-rs1391439-rs28633885	http://www.ebi.ac.uk/efo/EFO_0007924	Other measurement	http://www.ebi.ac.uk/efo/EFO_0001444
Prostate cancer	pelvic organ prolapse	1377	8	1	1	2	0.00673803	1.98e-05	0.000357276	0.0528769	0.00144613	0.00288809	0.00271591	rs10744813-rs2555013-rs2003611-rs1247943|rs9306894	http://www.ebi.ac.uk/efo/EFO_0004710	Other disease	http://www.ebi.ac.uk/efo/EFO_0000408
Prostate cancer	reticulocyte count	1377	379	1	4	5	0.319214	2.06e-05	0.000369124	0.0549996	0.00285551	0.00569476	0.01005	rs1573296-rs1264377|rs145380596-rs2022065|rs78132593|rs11666569-rs7246865|rs10838703-rs2868996	http://www.ebi.ac.uk/efo/EFO_0007986	Hematological measurement	http://www.ebi.ac.uk/efo/EFO_0004503
Prostate cancer	mean corpuscular volume	1377	386	0	5	5	0.32511	2.24e-05	0.000397394	0.0600065	0.00284414	0.00567215	0.01001	rs2242652-rs4449583-rs7725218|rs35756290-rs200510190|rs1881966-rs12638862|rs2942219-rs2942194-rs10099421|rs2038542-rs11153147	http://www.ebi.ac.uk/efo/EFO_0004526	Hematological measurement	http://www.ebi.ac.uk/efo/EFO_0004503
Prostate cancer	serum gamma-glutamyl transferase measurement	1377	63	0	3	3	0.053062	2.28e-05	0.000400903	0.0609372	0.00208768	0.00416667	0.00518755	rs1495525-rs3847055-rs1039057-rs6465657|rs13395911-rs7604500|rs111804060-rs4521985	http://www.ebi.ac.uk/efo/EFO_0004532	Liver enzyme measurement	http://www.ebi.ac.uk/efo/EFO_0004582
Prostate cancer	Vitiligo	1377	64	0	3	3	0.0539042	2.39e-05	0.000417607	0.0638939	0.00208623	0.00416377	0.00518472	rs2304206-rs73058052|rs11966200-rs67497292|rs16896742-rs145380596-rs60131261	http://www.ebi.ac.uk/efo/EFO_0004208	Immune system disorder	http://www.ebi.ac.uk/efo/EFO_0000540
Prostate cancer	hepatitis B virus infection	1377	9	0	2	2	0.00758028	2.54e-05	0.000435554	0.0679465	0.00144509	0.002886	0.0027341	rs9263773-rs1419881|rs3077-rs17220885	http://www.ebi.ac.uk/efo/EFO_0004197	Digestive system disorder	http://www.ebi.ac.uk/efo/EFO_0000405
Prostate cancer	serum IgE measurement	1377	9	0	2	2	0.00758028	2.54e-05	0.000435554	0.0679465	0.00144509	0.002886	0.0027341	rs2858331-rs13191810|rs16896742-rs2571391	http://www.ebi.ac.uk/efo/EFO_0004579	Other measurement	http://www.ebi.ac.uk/efo/EFO_0001444
Prostate cancer	chronic hepatitis B virus infection	1377	10	0	2	2	0.00842253	3.18e-05	0.000540672	0.0848855	0.00144404	0.00288392	0.00274824	rs3077-rs17220885|rs2844626-rs887468-rs2853953	http://www.ebi.ac.uk/efo/EFO_0004239	Digestive system disorder	http://www.ebi.ac.uk/efo/EFO_0000405
Prostate cancer	albuminuria	1377	71	0	3	3	0.0598	3.26e-05	0.000552311	0.0872652	0.00207612	0.00414365	0.00516434	rs112976982-rs112607182|rs13394343-rs2028900-rs719023-rs11680227-rs6729475|rs2023844-rs12666259	http://www.ebi.ac.uk/efo/EFO_0004285	Other trait	http://www.ebi.ac.uk/efo/EFO_0000001
Prostate cancer	inflammatory bowel disease	1377	215	0	4	4	0.181084	3.77e-05	0.000633039	0.100653	0.00251889	0.00502513	0.00757391	rs4911259-rs11480453|rs10786678-rs2274351|rs6062496-rs6062298|rs367664373-rs76527535	http://www.ebi.ac.uk/efo/EFO_0003767	Digestive system disorder	http://www.ebi.ac.uk/efo/EFO_0000405
Prostate cancer	thyroid carcinoma	1377	11	0	2	2	0.00926479	3.88e-05	0.000640067	0.103691	0.001443	0.00288184	0.00275943	rs1881966-rs6793295|rs7902587-rs34547036	http://www.ebi.ac.uk/efo/EFO_0002892	Cancer	http://www.ebi.ac.uk/efo/EFO_0000616
Prostate cancer	nephrotic syndrome	1377	11	0	2	2	0.00926479	3.88e-05	0.000640067	0.103691	0.001443	0.00288184	0.00275943	rs17212846-rs147599819-rs28366266|rs9368733-rs9273542-rs9273539	http://www.ebi.ac.uk/efo/EFO_0004255	Other disease	http://www.ebi.ac.uk/efo/EFO_0000408
Prostate cancer	PR interval	1377	240	0	4	4	0.202141	5.77e-05	0.000939938	0.15415	0.00247985	0.00494743	0.00745827	rs12640669-rs6853490-rs2172448-rs12510147|rs12881375-rs7158115-rs62003514|rs2860197-rs2912774|rs564601-rs12808601	http://www.ebi.ac.uk/efo/EFO_0004462	Cardiovascular measurement	http://www.ebi.ac.uk/efo/EFO_0004298
Prostate cancer	rosacea severity measurement	1377	14	1	1	2	0.0117915	6.41e-05	0.00103177	0.171273	0.00143988	0.00287563	0.00278163	rs3130977-rs3130976|rs3132451	http://www.ebi.ac.uk/efo/EFO_0009180	Other measurement	http://www.ebi.ac.uk/efo/EFO_0001444
Prostate cancer	adult onset asthma	1377	91	0	3	3	0.0766451	6.85e-05	0.00109682	0.183168	0.00204778	0.00408719	0.00510315	rs2412099-rs10667251|rs564601-rs1784775|rs35789108-rs6905775-rs9271726	http://www.ebi.ac.uk/efo/EFO_1002011	Other disease	http://www.ebi.ac.uk/efo/EFO_0000408
Prostate cancer	urate measurement	1377	253	0	4	4	0.21309	7.07e-05	0.00111967	0.188962	0.00246002	0.00490798	0.00739937	rs6905775-rs9271726-rs9271585|rs6678244-rs2356864|rs9648907-rs6465657-rs11551890|rs2306364-rs11227289-rs4014195	http://www.ebi.ac.uk/efo/EFO_0004531	Other measurement	http://www.ebi.ac.uk/efo/EFO_0001444
Prostate cancer	Oral ulcer	1377	92	0	3	3	0.0774873	7.08e-05	0.00111967	0.189224	0.00204638	0.00408441	0.00510003	rs11204668-rs11204677|rs16896742-rs41546314|rs142628781-rs35957957	http://purl.obolibrary.org/obo/HP_0000155	Other trait	http://www.ebi.ac.uk/efo/EFO_0000001
Prostate cancer	sex hormone-binding globulin measurement	1377	15	0	2	2	0.0126338	7.39e-05	0.00115504	0.197512	0.00143885	0.00287356	0.00278651	rs10953258-rs3779195-rs74672857|rs11655704-rs2411984	http://www.ebi.ac.uk/efo/EFO_0004696	Other measurement	http://www.ebi.ac.uk/efo/EFO_0001444
Prostate cancer	interstitial lung disease	1377	15	0	2	2	0.0126338	7.39e-05	0.00115504	0.197512	0.00143885	0.00287356	0.00278651	rs1881966-rs6793295|rs2736100-rs7725218	http://www.ebi.ac.uk/efo/EFO_0004244	Other disease	http://www.ebi.ac.uk/efo/EFO_0000408
Prostate cancer	depressive symptom measurement	1377	259	0	4	4	0.218144	7.74e-05	0.00120244	0.20682	0.00245098	0.00488998	0.00737246	rs2233974-rs3132556|rs1264377-rs149543464|rs10168771-rs2539985|rs4671459-rs76298426-rs72821624	http://www.ebi.ac.uk/efo/EFO_0007006	Other measurement	http://www.ebi.ac.uk/efo/EFO_0001444
Prostate cancer	HMG CoA reductase inhibitor use measurement	1377	97	0	3	3	0.0816986	8.29e-05	0.00128015	0.221466	0.00203943	0.00407056	0.00508436	rs2539985-rs2080227|rs7213086-rs569426962|rs374071816-rs74617384	http://www.ebi.ac.uk/efo/EFO_0009932	Other measurement	http://www.ebi.ac.uk/efo/EFO_0001444
Prostate cancer	respiratory system disease	1377	103	0	3	3	0.0867521	9.9e-05	0.00151225	0.264644	0.00203114	0.00405405	0.00506547	rs2811387-rs11391389|rs6011033-rs6062298-rs201497780-rs2256814|rs2847344-rs6687430	http://www.ebi.ac.uk/efo/EFO_0000684	Other disease	http://www.ebi.ac.uk/efo/EFO_0000408
Prostate cancer	cigarettes per day measurement	1377	104	0	3	3	0.0875943	0.000101883	0.00154735	0.272334	0.00202977	0.00405132	0.00506232	rs12764388-rs9645569|rs78408772-rs79766835|rs329117-rs329118	http://www.ebi.ac.uk/efo/EFO_0006525	Other measurement	http://www.ebi.ac.uk/efo/EFO_0001444
Prostate cancer	Malignant epithelial tumor of ovary	1377	18	0	2	2	0.0151606	0.00010749	0.00161416	0.28732	0.00143575	0.00286738	0.00279652	rs9303542-rs12945803|rs10069690-rs2242652-rs7725218	http://www.orpha.net/ORDO/Orphanet_398934	NR	NR
Prostate cancer	acne	1377	19	0	2	2	0.0160028	0.000120068	0.00177316	0.320942	0.00143472	0.00286533	0.00279872	rs10911221-rs10911268|rs2306364-rs11227289-rs61744384	http://www.ebi.ac.uk/efo/EFO_0003894	Other disease	http://www.ebi.ac.uk/efo/EFO_0000408
Prostate cancer	hypospadias	1377	19	0	2	2	0.0160028	0.000120068	0.00177316	0.320942	0.00143472	0.00286533	0.00279872	rs6948467-rs10214930-rs1111647|rs2999052-rs9847576	http://www.ebi.ac.uk/efo/EFO_0004209	Other disease	http://www.ebi.ac.uk/efo/EFO_0000408
Prostate cancer	Sarcoidosis	1377	19	1	1	2	0.0160028	0.000120068	0.00177316	0.320942	0.00143472	0.00286533	0.00279872	rs1611136-rs1633005|rs2233974	http://www.orpha.net/ORDO/Orphanet_797	NR	NR
Prostate cancer	creatinine measurement	1377	111	0	3	3	0.0934901	0.000123557	0.00181465	0.330267	0.0020202	0.00403226	0.00504021	rs653753-rs316020|rs4646239-rs3120137-rs316001-rs2279463|rs2306364-rs11227289-rs7123489	http://www.ebi.ac.uk/efo/EFO_0004518	Other measurement	http://www.ebi.ac.uk/efo/EFO_0001444
Prostate cancer	testicular carcinoma	1377	20	0	2	2	0.0168451	0.000133334	0.00193697	0.356403	0.00143369	0.00286328	0.0028005	rs2736100-rs7725218|rs4721134-rs12699477	http://www.ebi.ac.uk/efo/EFO_0005088	Cancer	http://www.ebi.ac.uk/efo/EFO_0000616
Prostate cancer	response to vaccine	1377	20	0	2	2	0.0168451	0.000133334	0.00193697	0.356403	0.00143369	0.00286328	0.0028005	rs7745040-rs9275160-rs9273555|rs2395179-rs3129859	http://www.ebi.ac.uk/efo/EFO_0004645	Biological process	http://purl.obolibrary.org/obo/GO_0008150
Prostate cancer	wellbeing measurement	1377	300	0	4	4	0.252676	0.000135954	0.00196435	0.363406	0.00239091	0.00477042	0.00719333	rs4671459-rs76298426-rs72821624|rs7554469-rs2841102|rs10168771-rs2539985|rs2233980-rs2233974	http://www.ebi.ac.uk/efo/EFO_0007869	Other measurement	http://www.ebi.ac.uk/efo/EFO_0001444
Prostate cancer	neuroticism measurement	1377	571	0	5	5	0.480927	0.000141072	0.00202735	0.377086	0.00257334	0.00513347	0.00905553	rs35763039-rs1039057-rs6465657|rs2233974-rs3132556|rs4671459-rs76298426-rs72821624|rs10838703-rs11039182|rs10168771-rs2539985	http://www.ebi.ac.uk/efo/EFO_0007660	Other measurement	http://www.ebi.ac.uk/efo/EFO_0001444
Prostate cancer	blood urea nitrogen measurement	1377	119	0	3	3	0.100228	0.00015176	0.00215774	0.405655	0.00200938	0.00401069	0.00501494	rs4242949-rs7327286|rs10838703-rs11039216|rs2306364-rs11227289-rs7123489	http://www.ebi.ac.uk/efo/EFO_0004741	Other measurement	http://www.ebi.ac.uk/efo/EFO_0001444
Prostate cancer	IGA glomerulonephritis	1377	23	0	2	2	0.0193718	0.000177247	0.00250678	0.473782	0.00143062	0.00285714	0.00280385	rs660895-rs9271726|rs16896742-rs2523946	http://www.ebi.ac.uk/efo/EFO_0004194	Other disease	http://www.ebi.ac.uk/efo/EFO_0000408
Prostate cancer	smoking behaviour measurement	1377	127	0	3	3	0.106966	0.000183843	0.00258639	0.491413	0.00199867	0.00398936	0.00498971	rs329117-rs329120|rs2244524-rs10786678-rs7077678|rs35756290-rs12244388	http://www.ebi.ac.uk/efo/EFO_0005671	Other measurement	http://www.ebi.ac.uk/efo/EFO_0001444
Prostate cancer	kidney stone	1377	25	0	2	2	0.0210563	0.000209939	0.00293805	0.561168	0.00142857	0.00285307	0.00280483	rs12539707-rs1111647|rs145172691-rs77648599	NA	NA	NA
Prostate cancer	non-melanoma skin carcinoma	1377	26	0	2	2	0.0218986	0.000227307	0.00314814	0.607591	0.00142755	0.00285103	0.00280503	rs1861270-rs10202963-rs3769823|rs31487-rs2735948	http://www.ebi.ac.uk/efo/EFO_0009260	Cancer	http://www.ebi.ac.uk/efo/EFO_0000616
Prostate cancer	ovarian carcinoma	1377	26	0	2	2	0.0218986	0.000227307	0.00314814	0.607591	0.00142755	0.00285103	0.00280503	rs7207826-rs12945803|rs7705526-rs10069690-rs2242652-rs7725218	http://www.ebi.ac.uk/efo/EFO_0001075	Cancer	http://www.ebi.ac.uk/efo/EFO_0000616
Prostate cancer	intraocular pressure measurement	1377	346	0	4	4	0.29142	0.000233921	0.00322305	0.625271	0.00232693	0.00464306	0.00700188	rs2412099-rs11079868|rs35638741-rs305459-rs12139208-rs12131120-rs41461152|rs62186363-rs55659209-rs113492892|rs530696125-rs13429533-rs6740722	http://www.ebi.ac.uk/efo/EFO_0004695	Other measurement	http://www.ebi.ac.uk/efo/EFO_0001444
Prostate cancer	body height at birth	1377	27	0	2	2	0.0227408	0.000245354	0.00336324	0.655831	0.00142653	0.002849	0.00280507	rs905938-rs3753639-rs2242195|rs6763927-rs9846396	http://www.ebi.ac.uk/efo/EFO_0006784	Body measurement	http://www.ebi.ac.uk/efo/EFO_0004324
Prostate cancer	sclerosing cholangitis	1377	28	0	2	2	0.0235831	0.00026408	0.00360145	0.705885	0.00142552	0.00284697	0.00280496	rs7937682-rs564601|rs4143332-rs2233974	http://www.ebi.ac.uk/efo/EFO_0004268	Digestive system disorder	http://www.ebi.ac.uk/efo/EFO_0000405
Prostate cancer	nose morphology measurement	1377	33	0	2	2	0.0277944	0.000367842	0.00499108	0.983242	0.00142045	0.00283688	0.0028027	rs1558119-rs9915190-rs11867272|rs34702092-rs34882439	http://www.ebi.ac.uk/efo/EFO_0007843	Other measurement	http://www.ebi.ac.uk/efo/EFO_0001444
Prostate cancer	rheumatoid arthritis	1377	163	0	3	3	0.137287	0.000382026	0.00515735	1	0.00195185	0.0038961	0.00487755	rs9269234-rs9268830|rs660895-rs9271726|rs2233974-rs2596565	http://www.ebi.ac.uk/efo/EFO_0000685	Immune system disorder	http://www.ebi.ac.uk/efo/EFO_0000540
Prostate cancer	neutrophil percentage of granulocytes	1377	170	0	3	3	0.143183	0.000431823	0.00580031	1	0.00194301	0.00387847	0.00485609	rs339351-rs665401|rs34487581-rs12259338|rs1881966-rs9811216	http://www.ebi.ac.uk/efo/EFO_0007994	Hematological measurement	http://www.ebi.ac.uk/efo/EFO_0004503
Prostate cancer	dentures	1377	36	0	2	2	0.0303211	0.000438166	0.00585609	1	0.00141743	0.00283086	0.00280032	rs1569414-rs6006989|rs3865314-rs569426962	http://www.ebi.ac.uk/efo/EFO_0010078	Other trait	http://www.ebi.ac.uk/efo/EFO_0000001
Prostate cancer	ankylosing spondylitis	1377	38	0	2	2	0.0320056	0.000488391	0.00646272	1	0.00141543	0.00282686	0.00279843	rs16896742-rs2394250|rs569426962-rs9901869	http://www.ebi.ac.uk/efo/EFO_0003898	Immune system disorder	http://www.ebi.ac.uk/efo/EFO_0000540
Prostate cancer	facial morphology measurement	1377	38	0	2	2	0.0320056	0.000488391	0.00646272	1	0.00141543	0.00282686	0.00279843	rs1558119-rs8077906-rs9911515-rs9916542|rs2977562-rs9847576	http://www.ebi.ac.uk/efo/EFO_0007841	Other measurement	http://www.ebi.ac.uk/efo/EFO_0001444
Prostate cancer	eosinophil percentage of granulocytes	1377	184	0	3	3	0.154975	0.000543495	0.00712138	1	0.00192555	0.00384369	0.0048136	rs35306767-rs34487581|rs35735140-rs35957957|rs1111180-rs16896742	http://www.ebi.ac.uk/efo/EFO_0007996	Hematological measurement	http://www.ebi.ac.uk/efo/EFO_0004503
Prostate cancer	atopic eczema	1377	42	0	2	2	0.0353746	0.000596821	0.00770677	1	0.00141143	0.00281889	0.00279407	rs204999-rs176095|rs6062298-rs909341-rs201497780-rs2256814	http://www.ebi.ac.uk/efo/EFO_0000274	Immune system disorder	http://www.ebi.ac.uk/efo/EFO_0000540
Prostate cancer	Abnormality of refraction	1377	454	0	4	4	0.382383	0.000648069	0.00832831	1	0.00218938	0.0043692	0.0065889	rs4721135-rs4721134|rs6062298-rs2259858-rs201497780-rs2256814|rs11227289-rs620088|rs6767786-rs6763927	http://purl.obolibrary.org/obo/HP_0000539	Other trait	http://www.ebi.ac.uk/efo/EFO_0000001
Prostate cancer	myocardial infarction	1377	44	0	2	2	0.0370591	0.000655007	0.0083373	1	0.00140944	0.00281492	0.00279165	rs374071816-rs10455872|rs2028900-rs10176176	http://www.ebi.ac.uk/efo/EFO_0000612	Cardiovascular disease	http://www.ebi.ac.uk/efo/EFO_0000319
Prostate cancer	physical activity measurement	1377	44	0	2	2	0.0370591	0.000655007	0.0083373	1	0.00140944	0.00281492	0.00279165	rs336620-rs6775319|rs3094622-rs1264377	http://www.ebi.ac.uk/efo/EFO_0008002	Other measurement	http://www.ebi.ac.uk/efo/EFO_0001444
Prostate cancer	eosinophil percentage of leukocytes	1377	198	0	3	3	0.166766	0.000672108	0.00851443	1	0.0019084	0.00380952	0.00477169	rs9378249-rs35957957|rs11253530-rs34487581|rs1111180-rs16896742	http://www.ebi.ac.uk/efo/EFO_0007991	Hematological measurement	http://www.ebi.ac.uk/efo/EFO_0004503
Prostate cancer	coronary heart disease	1377	45	1	1	2	0.0379014	0.000685089	0.00859739	1	0.00140845	0.00281294	0.0027904	rs3127599-rs3127596|rs10755578	http://www.ebi.ac.uk/efo/EFO_0001645	Cardiovascular disease	http://www.ebi.ac.uk/efo/EFO_0000319
Prostate cancer	feeling nervous measurement	1377	45	0	2	2	0.0379014	0.000685089	0.00859739	1	0.00140845	0.00281294	0.0027904	rs10501320-rs10838703|rs9281573-rs707916	http://www.ebi.ac.uk/efo/EFO_0009597	Other measurement	http://www.ebi.ac.uk/efo/EFO_0001444
Prostate cancer	platelet component distribution width	1377	204	0	3	3	0.17182	0.000732656	0.00915135	1	0.00190114	0.00379507	0.0047539	rs4521985-rs2841102-rs4400599|rs2256040-rs9612008-rs62231652-rs135009-rs3091364|rs329117-rs329121	http://www.ebi.ac.uk/efo/EFO_0007984	Hematological measurement	http://www.ebi.ac.uk/efo/EFO_0004503
Prostate cancer	response to reverse transcriptase inhibitor	1377	1	0	1	1	0.000842253	0.000842253	0.00962112	1	0.000726216	0.00145138	0.000726216	rs2844626-rs887467-rs1265112	http://purl.obolibrary.org/obo/GO_0061479	Biological process	http://purl.obolibrary.org/obo/GO_0008150
Prostate cancer	antinuclear antibody measurement	1377	1	0	1	1	0.000842253	0.000842253	0.00962112	1	0.000726216	0.00145138	0.000726216	rs9271726-rs2395185	http://www.ebi.ac.uk/efo/EFO_0005949	Other measurement	http://www.ebi.ac.uk/efo/EFO_0001444
Prostate cancer	amygdala volume	1377	1	0	1	1	0.000842253	0.000842253	0.00962112	1	0.000726216	0.00145138	0.000726216	rs4357749-rs11111293	http://www.ebi.ac.uk/efo/EFO_0006934	Other measurement	http://www.ebi.ac.uk/efo/EFO_0001444
Prostate cancer	Kunitz-type protease inhibitor 2 measurement	1377	1	0	1	1	0.000842253	0.000842253	0.00962112	1	0.000726216	0.00145138	0.000726216	rs8112211-rs148041688	http://www.ebi.ac.uk/efo/EFO_0008200	Other measurement	http://www.ebi.ac.uk/efo/EFO_0001444
Prostate cancer	angiostatin measurement	1377	1	0	1	1	0.000842253	0.000842253	0.00962112	1	0.000726216	0.00145138	0.000726216	rs41265930-rs77009508	http://www.ebi.ac.uk/efo/EFO_0008024	Other measurement	http://www.ebi.ac.uk/efo/EFO_0001444
Prostate cancer	HPV seropositivity	1377	1	0	1	1	0.000842253	0.000842253	0.00962112	1	0.000726216	0.00145138	0.000726216	rs9357152-rs9275160	http://www.ebi.ac.uk/efo/EFO_0004510	Other measurement	http://www.ebi.ac.uk/efo/EFO_0001444
Prostate cancer	aortic valve calcification	1377	1	0	1	1	0.000842253	0.000842253	0.00962112	1	0.000726216	0.00145138	0.000726216	rs374071816-rs10455872	http://www.ebi.ac.uk/efo/EFO_0005239	Cardiovascular disease	http://www.ebi.ac.uk/efo/EFO_0000319
Prostate cancer	[Pyruvate dehydrogenase acetyl-transferring] kinase isozyme 1, mitochondrial measurement	1377	1	0	1	1	0.000842253	0.000842253	0.00962112	1	0.000726216	0.00145138	0.000726216	rs12052479-rs13401676-rs201928460-rs6433362	http://www.ebi.ac.uk/efo/EFO_0008010	Other measurement	http://www.ebi.ac.uk/efo/EFO_0001444
Prostate cancer	glycine measurement	1377	51	0	2	2	0.0429549	0.000879357	0.00987614	1	0.00140252	0.00280112	0.00278231	rs547176-rs543159-rs10755578|rs8078686-rs569426962	http://www.ebi.ac.uk/efo/EFO_0009767	Other measurement	http://www.ebi.ac.uk/efo/EFO_0001444
Prostate cancer	bipolar disorder	1377	51	0	2	2	0.0429549	0.000879357	0.00987614	1	0.00140252	0.00280112	0.00278231	rs9378249-rs35957957|rs4721134-rs4236274	NA	NA	NA
Prostate cancer	chronic kidney disease	1377	51	0	2	2	0.0429549	0.000879357	0.00987614	1	0.00140252	0.00280112	0.00278231	rs4646239-rs3120137-rs12207180-rs316001|rs2306364-rs11227289-rs7123489	http://www.ebi.ac.uk/efo/EFO_0003884	Other disease	http://www.ebi.ac.uk/efo/EFO_0000408
Prostate cancer	allergy, asthma	1377	51	0	2	2	0.0429549	0.000879357	0.00987614	1	0.00140252	0.00280112	0.00278231	rs564601-rs659529|rs6062298-rs201497780-rs2256814-rs3208007	NA	NA	NA
Prostate cancer	fasting blood glucose measurement	1377	55	0	2	2	0.0463239	0.00102191	0.0114291	1	0.0013986	0.0027933	0.00277652	rs733331-rs74695195|rs10838703-rs7944584	http://www.ebi.ac.uk/efo/EFO_0004465	Other measurement	http://www.ebi.ac.uk/efo/EFO_0001444
Prostate cancer	refractive error measurement	1377	232	1	2	3	0.195403	0.00106085	0.0118152	1	0.00186799	0.00372902	0.0046724	rs35638197|rs6763927-rs13069734|rs11764212-rs4721134	NA	NA	NA
Prostate cancer	Beta blocking agent use measurement	1377	59	0	2	2	0.0496929	0.0011748	0.0129228	1	0.0013947	0.00278552	0.00277049	rs3735533-rs12666259|rs374071816-rs74617384	http://www.ebi.ac.uk/efo/EFO_0009929	Other measurement	http://www.ebi.ac.uk/efo/EFO_0001444
Prostate cancer	sodium measurement	1377	63	0	2	2	0.053062	0.00133797	0.0146573	1	0.00139082	0.00277778	0.00276427	rs11808748-rs11584700|rs4919683-rs35756290	http://www.ebi.ac.uk/efo/EFO_0009282	Other measurement	http://www.ebi.ac.uk/efo/EFO_0001444
Prostate cancer	hair color	1377	252	0	3	3	0.212248	0.00134406	0.0146639	1	0.00184502	0.00368324	0.00461568	rs72930621-rs72917317|rs2847344-rs6687430|rs6763927-rs4683605	http://www.ebi.ac.uk/efo/EFO_0003924	Other trait	http://www.ebi.ac.uk/efo/EFO_0000001
Prostate cancer	multiple sclerosis	1377	258	1	2	3	0.217301	0.00143738	0.0156183	1	0.00183823	0.00366972	0.00459891	rs10007915-rs28633885-rs2726479|rs2256814|rs11079784-rs569426962	NA	NA	NA
Prostate cancer	coronary artery disease	1377	260	0	3	3	0.218986	0.00146936	0.0158371	1	0.00183599	0.00366524	0.00459334	rs55955923-rs789294|rs2028900-rs62164837-rs6743030|rs374071816-rs55730499	NA	NA	NA
Prostate cancer	systemic juvenile idiopathic arthritis	1377	2	0	1	1	0.00168451	0.0016838	0.0171133	1	0.000725689	0.00145033	0.000907496	rs9268830-rs41291794	http://www.ebi.ac.uk/efo/EFO_1001999	Immune system disorder	http://www.ebi.ac.uk/efo/EFO_0000540
Prostate cancer	matrix metalloproteinase 7 measurement	1377	2	0	1	1	0.00168451	0.0016838	0.0171133	1	0.000725689	0.00145033	0.000907496	rs12285347-rs11568818	http://www.ebi.ac.uk/efo/EFO_0010591	Other measurement	http://www.ebi.ac.uk/efo/EFO_0001444
Prostate cancer	response to interferon beta	1377	2	0	1	1	0.00168451	0.0016838	0.0171133	1	0.000725689	0.00145033	0.000907496	rs9272226-rs9272105	http://purl.obolibrary.org/obo/GO_0035456	Biological process	http://purl.obolibrary.org/obo/GO_0008150
Prostate cancer	polymyositis	1377	2	0	1	1	0.00168451	0.0016838	0.0171133	1	0.000725689	0.00145033	0.000907496	rs2233974-rs3094013	http://www.ebi.ac.uk/efo/EFO_0003063	Neurological disorder	http://www.ebi.ac.uk/efo/EFO_0000618
Prostate cancer	serum immunoglobulin measurement	1377	2	0	1	1	0.00168451	0.0016838	0.0171133	1	0.000725689	0.00145033	0.000907496	rs9271378-rs9271324	http://www.ebi.ac.uk/efo/EFO_0010127	Other measurement	http://www.ebi.ac.uk/efo/EFO_0001444
Prostate cancer	chronic rhinosinusitis	1377	2	0	1	1	0.00168451	0.0016838	0.0171133	1	0.000725689	0.00145033	0.000907496	rs6905775-rs114430970-rs9272226-rs1391371-rs9271726	http://www.ebi.ac.uk/efo/EFO_1000024	Other disease	http://www.ebi.ac.uk/efo/EFO_0000408
Prostate cancer	Uveal Melanoma	1377	2	0	1	1	0.00168451	0.0016838	0.0171133	1	0.000725689	0.00145033	0.000907496	rs452932-rs2735948	http://www.ebi.ac.uk/efo/EFO_1000616	Cancer	http://www.ebi.ac.uk/efo/EFO_0000616
Prostate cancer	Immunosuppressant use measurement	1377	2	0	1	1	0.00168451	0.0016838	0.0171133	1	0.000725689	0.00145033	0.000907496	rs114430970-rs687308-rs9271726	http://www.ebi.ac.uk/efo/EFO_0009934	Other measurement	http://www.ebi.ac.uk/efo/EFO_0001444
Prostate cancer	sunburn	1377	81	0	2	2	0.0682225	0.00219748	0.0222495	1	0.00137363	0.00274348	0.00273489	rs10198990-rs72821624-rs113419088|rs150527451-rs72930621	http://www.ebi.ac.uk/efo/EFO_0003958	Other disease	http://www.ebi.ac.uk/efo/EFO_0000408
Prostate cancer	insomnia measurement	1377	313	0	3	3	0.263625	0.00248517	0.024141	1	0.0017783	0.0035503	0.0044503	rs6457796-rs9469899|rs878987-rs58475265|rs7615602-rs336620	http://www.ebi.ac.uk/efo/EFO_0007876	Other measurement	http://www.ebi.ac.uk/efo/EFO_0001444
Prostate cancer	head and neck squamous cell carcinoma	1377	3	0	1	1	0.00252676	0.00252463	0.024141	1	0.000725163	0.00144928	0.000967351	rs1265081-rs1265094	http://www.ebi.ac.uk/efo/EFO_0000181	Cancer	http://www.ebi.ac.uk/efo/EFO_0000616
Prostate cancer	total blood protein measurement	1377	3	1	0	1	0.00252676	0.00252463	0.024141	1	0.000725163	0.00144928	0.000967351	rs204999	http://www.ebi.ac.uk/efo/EFO_0004536	Hematological measurement	http://www.ebi.ac.uk/efo/EFO_0004503
Prostate cancer	Vasodilators used in cardiac diseases use measurement	1377	3	0	1	1	0.00252676	0.00252463	0.024141	1	0.000725163	0.00144928	0.000967351	rs374071816-rs55730499	http://www.ebi.ac.uk/efo/EFO_0009926	Other measurement	http://www.ebi.ac.uk/efo/EFO_0001444
Prostate cancer	seasonal allergic rhinitis	1377	3	0	1	1	0.00252676	0.00252463	0.024141	1	0.000725163	0.00144928	0.000967351	rs17212846-rs7775228	http://www.ebi.ac.uk/efo/EFO_0003956	Immune system disorder	http://www.ebi.ac.uk/efo/EFO_0000540
Prostate cancer	laryngeal squamous cell carcinoma	1377	3	0	1	1	0.00252676	0.00252463	0.024141	1	0.000725163	0.00144928	0.000967351	rs10744813-rs10492336	http://www.ebi.ac.uk/efo/EFO_0006352	Cancer	http://www.ebi.ac.uk/efo/EFO_0000616
Prostate cancer	Frontotemporal dementia	1377	3	0	1	1	0.00252676	0.00252463	0.024141	1	0.000725163	0.00144928	0.000967351	rs2157333-rs9268856	http://www.orpha.net/ORDO/Orphanet_282	NR	NR
Prostate cancer	Menorrhagia	1377	3	0	1	1	0.00252676	0.00252463	0.024141	1	0.000725163	0.00144928	0.000967351	rs72709458-rs2242652-rs7725218	http://purl.obolibrary.org/obo/HP_0000132	Other trait	http://www.ebi.ac.uk/efo/EFO_0000001
Prostate cancer	smoking cessation	1377	88	0	2	2	0.0741183	0.00258617	0.0246008	1	0.00136705	0.00273038	0.00272312	rs329117-rs329120|rs6062298-rs2256814-rs3761123	http://www.ebi.ac.uk/efo/EFO_0004319	Biological process	http://purl.obolibrary.org/obo/GO_0008150
Prostate cancer	CCL19 measurement	1377	4	0	1	1	0.00336901	0.00336476	0.02998	1	0.000724638	0.00144823	0.000996888	rs17212846-rs7775228	http://www.ebi.ac.uk/efo/EFO_0009415	Other measurement	http://www.ebi.ac.uk/efo/EFO_0001444
Prostate cancer	susceptibility to scarlet fever measurement	1377	4	0	1	1	0.00336901	0.00336476	0.02998	1	0.000724638	0.00144823	0.000996888	rs715299-rs204990	http://www.ebi.ac.uk/efo/EFO_0008409	Other measurement	http://www.ebi.ac.uk/efo/EFO_0001444
Prostate cancer	cation-independent mannose-6-phosphate receptor measurement	1377	4	1	0	1	0.00336901	0.00336476	0.02998	1	0.000724638	0.00144823	0.000996888	rs600324	http://www.ebi.ac.uk/efo/EFO_0008075	Other measurement	http://www.ebi.ac.uk/efo/EFO_0001444
Prostate cancer	response to statin	1377	4	0	1	1	0.00336901	0.00336476	0.02998	1	0.000724638	0.00144823	0.000996888	rs374071816-rs10455872	http://purl.obolibrary.org/obo/GO_0036273	Biological process	http://purl.obolibrary.org/obo/GO_0008150
Prostate cancer	BRCAX breast cancer	1377	4	0	1	1	0.00336901	0.00336476	0.02998	1	0.000724638	0.00144823	0.000996888	rs2860197-rs2981575	http://www.ebi.ac.uk/efo/EFO_0009443	Cancer	http://www.ebi.ac.uk/efo/EFO_0000616
Prostate cancer	Fuchs endothelial corneal dystrophy	1377	4	0	1	1	0.00336901	0.00336476	0.02998	1	0.000724638	0.00144823	0.000996888	rs10911221-rs3768617-rs41475048	http://www.orpha.net/ORDO/Orphanet_98974	Other disease	http://www.ebi.ac.uk/efo/EFO_0000408
Prostate cancer	temporal arteritis	1377	4	0	1	1	0.00336901	0.00336476	0.02998	1	0.000724638	0.00144823	0.000996888	rs9268905-rs6905775-rs9275592-rs9271726	http://www.ebi.ac.uk/efo/EFO_1001209	Cardiovascular disease	http://www.ebi.ac.uk/efo/EFO_0000319
Prostate cancer	perceived unattractiveness to mosquitos measurement	1377	4	0	1	1	0.00336901	0.00336476	0.02998	1	0.000724638	0.00144823	0.000996888	rs9268804-rs9268659	http://www.ebi.ac.uk/efo/EFO_0008380	Other measurement	http://www.ebi.ac.uk/efo/EFO_0001444
Prostate cancer	urinary arsenic measurement	1377	4	0	1	1	0.00336901	0.00336476	0.02998	1	0.000724638	0.00144823	0.000996888	rs9527-rs35756290	http://www.ebi.ac.uk/efo/EFO_0004880	Other measurement	http://www.ebi.ac.uk/efo/EFO_0001444
Prostate cancer	susceptibility to chickenpox measurement	1377	4	0	1	1	0.00336901	0.00336476	0.02998	1	0.000724638	0.00144823	0.000996888	rs16896742-rs10947050-rs145380596	http://www.ebi.ac.uk/efo/EFO_0008400	Other measurement	http://www.ebi.ac.uk/efo/EFO_0001444
Prostate cancer	aortic stenosis	1377	4	0	1	1	0.00336901	0.00336476	0.02998	1	0.000724638	0.00144823	0.000996888	rs374071816-rs10455872	http://www.ebi.ac.uk/efo/EFO_0000266	Cardiovascular disease	http://www.ebi.ac.uk/efo/EFO_0000319
Prostate cancer	Diuretic use measurement	1377	102	0	2	2	0.0859098	0.00345294	0.0306635	1	0.0013541	0.00270453	0.00269938	rs12666259-rs34635662-rs916880|rs10838703-rs12801188	http://www.ebi.ac.uk/efo/EFO_0009928	Other measurement	http://www.ebi.ac.uk/efo/EFO_0001444
Prostate cancer	nicotine dependence	1377	5	0	1	1	0.00421127	0.00420418	0.0363682	1	0.000724113	0.00144718	0.0010143	rs910083-rs11480453	http://www.ebi.ac.uk/efo/EFO_0003768	Neurological disorder	http://www.ebi.ac.uk/efo/EFO_0000618
Prostate cancer	Peptic ulcer and gastro-oesophageal reflux disease (GORD) drug use measurement	1377	5	0	1	1	0.00421127	0.00420418	0.0363682	1	0.000724113	0.00144718	0.0010143	rs2233974-rs1619179	http://www.ebi.ac.uk/efo/EFO_0009923	Other measurement	http://www.ebi.ac.uk/efo/EFO_0001444
Prostate cancer	esophageal adenocarcinoma	1377	5	0	1	1	0.00421127	0.00420418	0.0363682	1	0.000724113	0.00144718	0.0010143	rs16987961-rs9306894-rs7255	http://www.ebi.ac.uk/efo/EFO_0000478	Cancer	http://www.ebi.ac.uk/efo/EFO_0000616
Prostate cancer	esophageal squamous cell carcinoma	1377	5	0	1	1	0.00421127	0.00420418	0.0363682	1	0.000724113	0.00144718	0.0010143	rs1861270-rs13016963	http://www.ebi.ac.uk/efo/EFO_0005922	Cancer	http://www.ebi.ac.uk/efo/EFO_0000616
Prostate cancer	triple-negative breast cancer	1377	5	1	0	1	0.00421127	0.00420418	0.0363682	1	0.000724113	0.00144718	0.0010143	rs78378222	http://www.ebi.ac.uk/efo/EFO_0005537	Cancer	http://www.ebi.ac.uk/efo/EFO_0000616
Prostate cancer	age at menopause	1377	120	1	1	2	0.10107	0.00473854	0.0408585	1	0.00133779	0.00267201	0.00266879	rs34978822-rs71325459|rs11245450	http://www.ebi.ac.uk/efo/EFO_0004704	Other measurement	http://www.ebi.ac.uk/efo/EFO_0001444
Prostate cancer	schizophrenia, bipolar disorder	1377	6	0	1	1	0.00505352	0.0050429	0.0425226	1	0.000723589	0.00144613	0.00102564	rs4721134-rs10275045	NA	NA	NA
Prostate cancer	kidney disease	1377	6	0	1	1	0.00505352	0.0050429	0.0425226	1	0.000723589	0.00144613	0.00102564	rs9268804-rs3115573	http://www.ebi.ac.uk/efo/EFO_0003086	Other disease	http://www.ebi.ac.uk/efo/EFO_0000408
Prostate cancer	Non-steroidal anti-inflammatory and antirheumatic product use measurement	1377	6	0	1	1	0.00505352	0.0050429	0.0425226	1	0.000723589	0.00144613	0.00102564	rs2428503-rs2517611	http://www.ebi.ac.uk/efo/EFO_0009935	Other measurement	http://www.ebi.ac.uk/efo/EFO_0001444
Prostate cancer	serum metabolite measurement	1377	126	0	2	2	0.106124	0.00520892	0.0437844	1	0.00133245	0.00266134	0.00265863	rs653753-rs316020|rs34131062-rs35957957-rs28367685-rs9461680	http://www.ebi.ac.uk/efo/EFO_0005653	Other measurement	http://www.ebi.ac.uk/efo/EFO_0001444
Prostate cancer	ulcerative colitis	1377	130	0	2	2	0.109493	0.00553394	0.0463706	1	0.0013289	0.00265428	0.00265188	rs6062496-rs6062298-rs201497780-rs2256814-rs2297441|rs9268853-rs9271726	http://www.ebi.ac.uk/efo/EFO_0000729	Immune system disorder	http://www.ebi.ac.uk/efo/EFO_0000540
Prostate cancer	nervousness	1377	7	0	1	1	0.00589577	0.00588091	0.0483682	1	0.000723066	0.00144509	0.00103352	rs10501320-rs10838703	http://purl.obolibrary.org/obo/NCIT_C74532	Neurological disorder	http://www.ebi.ac.uk/efo/EFO_0000618
Prostate cancer	Anilide use measurement	1377	7	0	1	1	0.00589577	0.00588091	0.0483682	1	0.000723066	0.00144509	0.00103352	rs3130486-rs9281573	http://www.ebi.ac.uk/efo/EFO_0009938	Other measurement	http://www.ebi.ac.uk/efo/EFO_0001444
Prostate cancer	Churg-Strauss syndrome	1377	7	0	1	1	0.00589577	0.00588091	0.0483682	1	0.000723066	0.00144509	0.00103352	rs17212014-rs17212846	http://www.ebi.ac.uk/efo/EFO_0007208	Cardiovascular disease	http://www.ebi.ac.uk/efo/EFO_0000319
Prostate cancer	plasma plasminogen measurement	1377	7	1	0	1	0.00589577	0.00588091	0.0483682	1	0.000723066	0.00144509	0.00103352	rs3798911	http://www.ebi.ac.uk/efo/EFO_0006309	Other measurement	http://www.ebi.ac.uk/efo/EFO_0001444
Prostate cancer	adolescent idiopathic scoliosis	1377	871	1	3	4	0.733603	0.00671171	0.0545829	1	0.00178253	0.00355872	0.00536318	rs11981911-rs42099|rs10239311-rs17455862|rs6729475-rs11680227-rs960066|rs1978060	http://www.ebi.ac.uk/efo/EFO_0005423	Other disease	http://www.ebi.ac.uk/efo/EFO_0000408
Prostate cancer	progesterone measurement	1377	8	0	1	1	0.00673803	0.00671821	0.0545829	1	0.000722543	0.00144404	0.00103923	rs10786714-rs35756290	http://www.ebi.ac.uk/efo/EFO_0007004	Lipid or lipoprotein measurement	http://www.ebi.ac.uk/efo/EFO_0004529
Prostate cancer	hypothyroidism	1377	152	0	2	2	0.128023	0.00748197	0.0604208	1	0.00130976	0.00261609	0.00261506	rs7705526-rs7725218|rs3131789-rs2517532	http://www.ebi.ac.uk/efo/EFO_0004705	Other disease	http://www.ebi.ac.uk/efo/EFO_0000408
Prostate cancer	high altitude adaptation	1377	9	0	1	1	0.00758028	0.00755481	0.0606427	1	0.000722022	0.001443	0.0010435	rs4498258-rs10055386	http://www.ebi.ac.uk/efo/EFO_0009105	Biological process	http://purl.obolibrary.org/obo/GO_0008150
Prostate cancer	aspirin use measurement	1377	10	0	1	1	0.00842253	0.00839071	0.0657723	1	0.000721501	0.00144196	0.00104677	rs374071816-rs74617384	http://www.ebi.ac.uk/efo/EFO_0007013	Other measurement	http://www.ebi.ac.uk/efo/EFO_0001444
Prostate cancer	serum IgG measurement	1377	10	0	1	1	0.00842253	0.00839071	0.0657723	1	0.000721501	0.00144196	0.00104677	rs17212846-rs9273539-rs2133037	http://www.ebi.ac.uk/efo/EFO_0004565	Other measurement	http://www.ebi.ac.uk/efo/EFO_0001444
Prostate cancer	age at first birth measurement	1377	10	0	1	1	0.00842253	0.00839071	0.0657723	1	0.000721501	0.00144196	0.00104677	rs71899872-rs10908557-rs111689685-rs4521985	http://www.ebi.ac.uk/efo/EFO_0009101	Other measurement	http://www.ebi.ac.uk/efo/EFO_0001444
Prostate cancer	neoplasm of mature B-cells	1377	10	0	1	1	0.00842253	0.00839071	0.0657723	1	0.000721501	0.00144196	0.00104677	rs3131789-rs1265094-rs6457327	http://www.ebi.ac.uk/efo/EFO_0000096	Cancer	http://www.ebi.ac.uk/efo/EFO_0000616
Prostate cancer	electrocardiography	1377	10	0	1	1	0.00842253	0.00839071	0.0657723	1	0.000721501	0.00144196	0.00104677	rs10838703-rs11039216	http://www.ebi.ac.uk/efo/EFO_0004327	Cardiovascular measurement	http://www.ebi.ac.uk/efo/EFO_0004298
Prostate cancer	HIV-1 infection	1377	10	0	1	1	0.00842253	0.00839071	0.0657723	1	0.000721501	0.00144196	0.00104677	rs9265885-rs9264942	http://www.ebi.ac.uk/efo/EFO_0000180	Other disease	http://www.ebi.ac.uk/efo/EFO_0000408
Prostate cancer	infant head circumference	1377	11	0	1	1	0.00926479	0.0092259	0.0714806	1	0.000720981	0.00144092	0.00104929	rs6763927-rs9846396	http://www.ebi.ac.uk/efo/EFO_0004577	Body measurement	http://www.ebi.ac.uk/efo/EFO_0004324
Prostate cancer	cancer biomarker measurement	1377	11	0	1	1	0.00926479	0.0092259	0.0714806	1	0.000720981	0.00144092	0.00104929	rs2739456-rs10424878-rs79015965	http://www.ebi.ac.uk/efo/EFO_0005127	Other measurement	http://www.ebi.ac.uk/efo/EFO_0001444
Prostate cancer	MHC class I polypeptide-related sequence B measurement	1377	11	0	1	1	0.00926479	0.0092259	0.0714806	1	0.000720981	0.00144092	0.00104929	rs3132645-rs1264377	http://www.ebi.ac.uk/efo/EFO_0008234	Other measurement	http://www.ebi.ac.uk/efo/EFO_0001444
Prostate cancer	white matter integrity	1377	12	0	1	1	0.010107	0.0100604	0.0768326	1	0.000720461	0.00143988	0.00105127	rs11813268-rs34547036	http://www.ebi.ac.uk/efo/EFO_0004641	Other measurement	http://www.ebi.ac.uk/efo/EFO_0001444
Prostate cancer	self rated health	1377	12	0	1	1	0.010107	0.0100604	0.0768326	1	0.000720461	0.00143988	0.00105127	rs76380179-rs9271726	http://www.ebi.ac.uk/efo/EFO_0004778	Other trait	http://www.ebi.ac.uk/efo/EFO_0000001
Prostate cancer	hippocampal tail volume	1377	12	0	1	1	0.010107	0.0100604	0.0768326	1	0.000720461	0.00143988	0.00105127	rs6678244-rs10888696	http://www.ebi.ac.uk/efo/EFO_0009398	Other measurement	http://www.ebi.ac.uk/efo/EFO_0001444
Prostate cancer	beta-2 microglobulin measurement	1377	12	0	1	1	0.010107	0.0100604	0.0768326	1	0.000720461	0.00143988	0.00105127	rs2596466-rs35957957	http://www.ebi.ac.uk/efo/EFO_0005197	Other measurement	http://www.ebi.ac.uk/efo/EFO_0001444
Prostate cancer	Nasal Cavity Polyp	1377	13	0	1	1	0.0109493	0.0108942	0.0822602	1	0.000719942	0.00143885	0.00105282	rs6905775-rs114430970-rs9272226-rs1391371-rs9271726	http://www.ebi.ac.uk/efo/EFO_1000391	Other disease	http://www.ebi.ac.uk/efo/EFO_0000408
Prostate cancer	heart failure	1377	13	0	1	1	0.0109493	0.0108942	0.0822602	1	0.000719942	0.00143885	0.00105282	rs374071816-rs55730499	http://www.ebi.ac.uk/efo/EFO_0003144	Cardiovascular disease	http://www.ebi.ac.uk/efo/EFO_0000319
Prostate cancer	neuroblastoma	1377	13	0	1	1	0.0109493	0.0108942	0.0822602	1	0.000719942	0.00143885	0.00105282	rs78378222-rs35850753	http://www.ebi.ac.uk/efo/EFO_0000621	Cancer	http://www.ebi.ac.uk/efo/EFO_0000616
Prostate cancer	Antithrombotic agent use measurement	1377	13	0	1	1	0.0109493	0.0108942	0.0822602	1	0.000719942	0.00143885	0.00105282	rs374071816-rs74617384	http://www.ebi.ac.uk/efo/EFO_0009925	Other measurement	http://www.ebi.ac.uk/efo/EFO_0001444
Prostate cancer	lipoprotein-associated phospholipase A(2) measurement	1377	14	0	1	1	0.0117915	0.0117273	0.0875613	1	0.000719424	0.00143782	0.00105404	rs374071816-rs10455872	http://www.ebi.ac.uk/efo/EFO_0004746	Lipid or lipoprotein measurement	http://www.ebi.ac.uk/efo/EFO_0004732
Prostate cancer	bipolar I disorder	1377	14	0	1	1	0.0117915	0.0117273	0.0875613	1	0.000719424	0.00143782	0.00105404	rs4721134-rs10950456	http://www.ebi.ac.uk/efo/EFO_0009963	Neurological disorder	http://www.ebi.ac.uk/efo/EFO_0000618
Prostate cancer	acute lymphoblastic leukemia	1377	14	0	1	1	0.0117915	0.0117273	0.0875613	1	0.000719424	0.00143782	0.00105404	rs2069426-rs17694493	http://www.ebi.ac.uk/efo/EFO_0000220	Cancer	http://www.ebi.ac.uk/efo/EFO_0000616
Prostate cancer	unipolar depression	1377	195	0	2	2	0.164239	0.0120416	0.0896579	1	0.00127388	0.00254453	0.00254516	rs3132685-rs1264377|rs2942219-rs950893	http://www.ebi.ac.uk/efo/EFO_0003761	Neurological disorder	http://www.ebi.ac.uk/efo/EFO_0000618
Prostate cancer	alcohol use disorder measurement	1377	15	0	1	1	0.0126338	0.0125596	0.0924846	1	0.000718907	0.00143678	0.001055	rs10838703-rs2293576	http://www.ebi.ac.uk/efo/EFO_0009458	Other measurement	http://www.ebi.ac.uk/efo/EFO_0001444
Prostate cancer	N-glycan measurement	1377	15	0	1	1	0.0126338	0.0125596	0.0924846	1	0.000718907	0.00143678	0.001055	rs878987-rs7928758	http://www.ebi.ac.uk/efo/EFO_0004999	Other measurement	http://www.ebi.ac.uk/efo/EFO_0001444
Prostate cancer	immune system disease	1377	15	0	1	1	0.0126338	0.0125596	0.0924846	1	0.000718907	0.00143678	0.001055	rs2233974-rs3130544-rs1264377	http://www.ebi.ac.uk/efo/EFO_0000540	Other disease	http://www.ebi.ac.uk/efo/EFO_0000408
Prostate cancer	breast size	1377	15	0	1	1	0.0126338	0.0125596	0.0924846	1	0.000718907	0.00143678	0.001055	rs7102705-rs7118260	http://www.ebi.ac.uk/efo/EFO_0004884	Body measurement	http://www.ebi.ac.uk/efo/EFO_0004324
Prostate cancer	atrial fibrillation	1377	200	0	2	2	0.168451	0.0126337	0.0927742	1	0.00126984	0.00253646	0.00253723	rs4951261-rs708723|rs4578216-rs11264280-rs2242195	http://www.ebi.ac.uk/efo/EFO_0000275	Cardiovascular disease	http://www.ebi.ac.uk/efo/EFO_0000319
Prostate cancer	Crohn's disease	1377	204	0	2	2	0.17182	0.0131163	0.0960546	1	0.00126662	0.00253004	0.00253091	rs6062298-rs2256814-rs6062504|rs9265885-rs9264942	http://www.ebi.ac.uk/efo/EFO_0000384	Digestive system disorder	http://www.ebi.ac.uk/efo/EFO_0000405
Prostate cancer	bladder carcinoma	1377	16	0	1	1	0.0134761	0.0133913	0.097269	1	0.000718391	0.00143575	0.00105574	rs401681-rs2735948	NA	NA	NA
Prostate cancer	anti-neutrophil antibody associated vasculitis	1377	16	0	1	1	0.0134761	0.0133913	0.097269	1	0.000718391	0.00143575	0.00105574	rs17220885-rs9277341	http://www.ebi.ac.uk/efo/EFO_0004826	Immune system disorder	http://www.ebi.ac.uk/efo/EFO_0000540
Prostate cancer	drug-induced liver injury	1377	17	0	1	1	0.0143183	0.0142223	0.10247	1	0.000717875	0.00143472	0.00105631	rs16896742-rs2523822	http://www.ebi.ac.uk/efo/EFO_0004228	Digestive system disorder	http://www.ebi.ac.uk/efo/EFO_0000405
Prostate cancer	Takayasu arteritis	1377	17	0	1	1	0.0143183	0.0142223	0.10247	1	0.000717875	0.00143472	0.00105631	rs12524487-rs35957957	http://www.ebi.ac.uk/efo/EFO_1001857	Cardiovascular disease	http://www.ebi.ac.uk/efo/EFO_0000319
Prostate cancer	Microalbuminuria	1377	18	0	1	1	0.0151606	0.0150526	0.10816	1	0.00071736	0.00143369	0.00105672	rs112976982-rs112607182	http://purl.obolibrary.org/obo/HP_0012594	Other trait	http://www.ebi.ac.uk/efo/EFO_0000001
Prostate cancer	Glucocorticoid use measurement	1377	19	0	1	1	0.0160028	0.0158822	0.113815	1	0.000716846	0.00143267	0.00105701	rs6905775-rs114430970-rs9272226-rs1391371-rs9271726	http://www.ebi.ac.uk/efo/EFO_0009942	Other measurement	http://www.ebi.ac.uk/efo/EFO_0001444
Prostate cancer	cataract	1377	20	0	1	1	0.0168451	0.0167111	0.1188	1	0.000716332	0.00143164	0.0010572	rs3176459-rs6678244	NA	NA	NA
Prostate cancer	Hodgkins lymphoma	1377	20	0	1	1	0.0168451	0.0167111	0.1188	1	0.000716332	0.00143164	0.0010572	rs9271726-rs2395185	http://www.ebi.ac.uk/efo/EFO_0000183	Cancer	http://www.ebi.ac.uk/efo/EFO_0000616
Prostate cancer	anxiety measurement	1377	20	0	1	1	0.0168451	0.0167111	0.1188	1	0.000716332	0.00143164	0.0010572	rs4603973-rs336620	http://www.ebi.ac.uk/efo/EFO_0009863	Other measurement	http://www.ebi.ac.uk/efo/EFO_0001444
Prostate cancer	peripheral arterial disease	1377	21	0	1	1	0.0176873	0.0175392	0.123375	1	0.00071582	0.00143062	0.00105729	rs374071816-rs118039278	http://www.ebi.ac.uk/efo/EFO_0004265	Cardiovascular disease	http://www.ebi.ac.uk/efo/EFO_0000319
Prostate cancer	susceptibility to childhood ear infection measurement	1377	21	1	0	1	0.0176873	0.0175392	0.123375	1	0.00071582	0.00143062	0.00105729	rs1978060	http://www.ebi.ac.uk/efo/EFO_0007904	Other measurement	http://www.ebi.ac.uk/efo/EFO_0001444
Prostate cancer	restless legs syndrome	1377	23	0	1	1	0.0193718	0.0191935	0.133954	1	0.000714796	0.00142857	0.00105726	rs12450895-rs71377382	http://www.ebi.ac.uk/efo/EFO_0004270	Neurological disorder	http://www.ebi.ac.uk/efo/EFO_0000618
Prostate cancer	white matter microstructure measurement	1377	256	0	2	2	0.215617	0.0200911	0.139853	1	0.00122624	0.00244948	0.0024513	rs10786678-rs7893954|rs34547036-rs2488002	http://www.ebi.ac.uk/efo/EFO_0005674	Other measurement	http://www.ebi.ac.uk/efo/EFO_0001444
Prostate cancer	cutaneous squamous cell carcinoma	1377	25	0	1	1	0.0210563	0.020845	0.144724	1	0.000713776	0.00142653	0.001057	rs10200279-rs1861270	http://www.ebi.ac.uk/efo/EFO_1001927	Cancer	http://www.ebi.ac.uk/efo/EFO_0000616
Prostate cancer	Headache	1377	28	0	1	1	0.0235831	0.0233171	0.160223	1	0.000712251	0.00142349	0.00105627	rs7555006-rs6678244	http://purl.obolibrary.org/obo/HP_0002315	Other trait	http://www.ebi.ac.uk/efo/EFO_0000001
Prostate cancer	potassium measurement	1377	28	0	1	1	0.0235831	0.0233171	0.160223	1	0.000712251	0.00142349	0.00105627	rs929250-rs12666259	http://www.ebi.ac.uk/efo/EFO_0009283	Other measurement	http://www.ebi.ac.uk/efo/EFO_0001444
Prostate cancer	biliary liver cirrhosis	1377	29	0	1	1	0.0244253	0.0241397	0.164606	1	0.000711744	0.00142248	0.00105595	rs9357152-rs9275160	http://www.ebi.ac.uk/efo/EFO_0004267	Cancer	http://www.ebi.ac.uk/efo/EFO_0000616
Prostate cancer	psoriatic arthritis	1377	30	0	1	1	0.0252676	0.0249616	0.167644	1	0.000711238	0.00142146	0.00105561	rs12191877-rs887468	http://www.ebi.ac.uk/efo/EFO_0003778	Immune system disorder	http://www.ebi.ac.uk/efo/EFO_0000540
Prostate cancer	insulin measurement	1377	30	0	1	1	0.0252676	0.0249616	0.167644	1	0.000711238	0.00142146	0.00105561	rs10501320-rs10838703	http://www.ebi.ac.uk/efo/EFO_0004467	Other measurement	http://www.ebi.ac.uk/efo/EFO_0001444
Prostate cancer	cervical carcinoma	1377	30	0	1	1	0.0252676	0.0249616	0.167644	1	0.000711238	0.00142146	0.00105561	rs3132461-rs2855811	http://www.ebi.ac.uk/efo/EFO_0001061	Cancer	http://www.ebi.ac.uk/efo/EFO_0000616
Prostate cancer	squamous cell lung carcinoma	1377	31	0	1	1	0.0261099	0.0257829	0.172726	1	0.000710732	0.00142045	0.00105524	rs467095-rs2735948	http://www.ebi.ac.uk/efo/EFO_0000708	Cancer	http://www.ebi.ac.uk/efo/EFO_0000616
Prostate cancer	body weight	1377	32	0	1	1	0.0269521	0.0266034	0.177778	1	0.000710227	0.00141945	0.00105485	rs6763927-rs7624084	http://www.ebi.ac.uk/efo/EFO_0004338	Body measurement	http://www.ebi.ac.uk/efo/EFO_0004324
Prostate cancer	serum alanine aminotransferase measurement	1377	34	0	1	1	0.0286366	0.0282425	0.187791	1	0.00070922	0.00141743	0.00105401	rs13395911-rs7604500	http://www.ebi.ac.uk/efo/EFO_0004735	Liver enzyme measurement	http://www.ebi.ac.uk/efo/EFO_0004582
Prostate cancer	optic cup area measurement	1377	34	0	1	1	0.0286366	0.0282425	0.187791	1	0.00070922	0.00141743	0.00105401	rs11870935-rs569426962	http://www.ebi.ac.uk/efo/EFO_0006940	Other measurement	http://www.ebi.ac.uk/efo/EFO_0001444
Prostate cancer	aspartate aminotransferase measurement	1377	36	0	1	1	0.0303211	0.0298788	0.1972	1	0.000708215	0.00141543	0.00105309	rs10165093-rs7604500	http://www.ebi.ac.uk/efo/EFO_0004736	Liver enzyme measurement	http://www.ebi.ac.uk/efo/EFO_0004582
Prostate cancer	age-related macular degeneration	1377	36	0	1	1	0.0303211	0.0298788	0.1972	1	0.000708215	0.00141543	0.00105309	rs2071277-rs9279507	http://www.ebi.ac.uk/efo/EFO_0001365	Neurological disorder	http://www.ebi.ac.uk/efo/EFO_0000618
Prostate cancer	osteoarthritis, hip	1377	37	0	1	1	0.0311634	0.0306959	0.202094	1	0.000707714	0.00141443	0.00105261	rs12785905-rs34419890	http://www.ebi.ac.uk/efo/EFO_1000786	Other disease	http://www.ebi.ac.uk/efo/EFO_0000408
Prostate cancer	bilirubin measurement	1377	39	0	1	1	0.0328479	0.032328	0.211796	1	0.000706714	0.00141243	0.00105161	rs13191810-rs147599819-rs2647074	http://www.ebi.ac.uk/efo/EFO_0004570	Other measurement	http://www.ebi.ac.uk/efo/EFO_0001444
Prostate cancer	multisite chronic pain	1377	39	0	1	1	0.0328479	0.032328	0.211796	1	0.000706714	0.00141243	0.00105161	rs10888692-rs6678244	http://www.ebi.ac.uk/efo/EFO_0010100	Other trait	http://www.ebi.ac.uk/efo/EFO_0000001
Prostate cancer	diverticular disease	1377	41	0	1	1	0.0345324	0.0339574	0.221386	1	0.000705716	0.00141044	0.00105057	rs11667256-rs12610267	http://www.ebi.ac.uk/efo/EFO_0009959	Digestive system disorder	http://www.ebi.ac.uk/efo/EFO_0000405
Prostate cancer	feeling miserable measurement	1377	44	0	1	1	0.0370591	0.0363964	0.236709	1	0.000704225	0.00140746	0.00104893	rs10838703-rs11039149	http://www.ebi.ac.uk/efo/EFO_0009598	Other measurement	http://www.ebi.ac.uk/efo/EFO_0001444
Prostate cancer	chin morphology measurement	1377	46	0	1	1	0.0387437	0.0380189	0.246662	1	0.000703235	0.00140548	0.00104781	rs9911515-rs1558119-rs56347314	http://www.ebi.ac.uk/efo/EFO_0007842	Other measurement	http://www.ebi.ac.uk/efo/EFO_0001444
Prostate cancer	QRS duration	1377	47	0	1	1	0.0395859	0.0388292	0.250097	1	0.000702741	0.00140449	0.00104723	rs6678244-rs11588271	http://www.ebi.ac.uk/efo/EFO_0005055	Cardiovascular measurement	http://www.ebi.ac.uk/efo/EFO_0004298
Prostate cancer	coffee consumption measurement	1377	48	0	1	1	0.0404282	0.0396388	0.254698	1	0.000702247	0.00140351	0.00104665	rs6681426-rs11204677	http://www.ebi.ac.uk/efo/EFO_0006781	Other measurement	http://www.ebi.ac.uk/efo/EFO_0001444
Prostate cancer	creatine kinase measurement	1377	54	0	1	1	0.0454817	0.0444819	0.28445	1	0.000699301	0.00139762	0.00104307	rs116924819-rs11245450	http://www.ebi.ac.uk/efo/EFO_0004534	Cardiovascular measurement	http://www.ebi.ac.uk/efo/EFO_0004298
Prostate cancer	Myopia	1377	56	0	1	1	0.0471662	0.0460909	0.292639	1	0.000698324	0.00139567	0.00104184	rs9866391-rs6763927	http://purl.obolibrary.org/obo/HP_0000545	Other trait	http://www.ebi.ac.uk/efo/EFO_0000001
Prostate cancer	fibrinogen measurement	1377	56	1	0	1	0.0471662	0.0460909	0.292639	1	0.000698324	0.00139567	0.00104184	rs73058052	http://www.ebi.ac.uk/efo/EFO_0004623	Hematological measurement	http://www.ebi.ac.uk/efo/EFO_0004503
Prostate cancer	suntan	1377	56	0	1	1	0.0471662	0.0460909	0.292639	1	0.000698324	0.00139567	0.00104184	rs72930621-rs72917317	http://www.ebi.ac.uk/efo/EFO_0004279	Other trait	http://www.ebi.ac.uk/efo/EFO_0000001
Prostate cancer	open-angle glaucoma	1377	57	1	0	1	0.0480084	0.0468943	0.296332	1	0.000697837	0.0013947	0.00104122	rs41461152	http://www.ebi.ac.uk/efo/EFO_0004190	Other disease	http://www.ebi.ac.uk/efo/EFO_0000408
Prostate cancer	Drugs used in diabetes use measurement	1377	57	0	1	1	0.0480084	0.0468943	0.296332	1	0.000697837	0.0013947	0.00104122	rs9273364-rs6905775	http://www.ebi.ac.uk/efo/EFO_0009924	Other measurement	http://www.ebi.ac.uk/efo/EFO_0001444
Prostate cancer	serum non-albumin protein measurement	1377	59	0	1	1	0.0496929	0.0484992	0.305751	1	0.000696864	0.00139276	0.00103998	rs2242652-rs4975538-rs7725218	http://www.ebi.ac.uk/efo/EFO_0004568	Other measurement	http://www.ebi.ac.uk/efo/EFO_0001444
Prostate cancer	snoring measurement	1377	60	0	1	1	0.0505352	0.0493007	0.310072	1	0.000696379	0.00139179	0.00103935	rs118005503-rs8108822	http://www.ebi.ac.uk/efo/EFO_0008341	Other measurement	http://www.ebi.ac.uk/efo/EFO_0001444
Prostate cancer	allergic rhinitis	1377	62	0	1	1	0.0522197	0.0509015	0.318641	1	0.00069541	0.00138985	0.00103809	rs10786678-rs35597970	http://www.ebi.ac.uk/efo/EFO_0005854	Immune system disorder	http://www.ebi.ac.uk/efo/EFO_0000540
Prostate cancer	basophil percentage of granulocytes	1377	62	0	1	1	0.0522197	0.0509015	0.318641	1	0.00069541	0.00138985	0.00103809	rs34487581-rs12762973	http://www.ebi.ac.uk/efo/EFO_0007995	Inflammatory measurement	http://www.ebi.ac.uk/efo/EFO_0004872
Prostate cancer	cerebrospinal fluid biomarker measurement	1377	64	0	1	1	0.0539042	0.0524996	0.327877	1	0.000694444	0.00138792	0.00103682	rs2304176-rs148041688	http://www.ebi.ac.uk/efo/EFO_0006794	Other measurement	http://www.ebi.ac.uk/efo/EFO_0001444
Prostate cancer	basophil percentage of leukocytes	1377	65	0	1	1	0.0547465	0.0532977	0.332086	1	0.000693963	0.00138696	0.00103619	rs34487581-rs12762973	http://www.ebi.ac.uk/efo/EFO_0007992	Inflammatory measurement	http://www.ebi.ac.uk/efo/EFO_0004872
Prostate cancer	influenza A (H1N1)	1377	68	0	1	1	0.0572732	0.0556879	0.346171	1	0.000692521	0.00138408	0.00103427	rs2894053-rs1632862	http://www.ebi.ac.uk/efo/EFO_1001488	Other disease	http://www.ebi.ac.uk/efo/EFO_0000408
Prostate cancer	primary biliary cirrhosis	1377	73	0	1	1	0.0614845	0.0596581	0.369135	1	0.000690131	0.00137931	0.00103104	rs3129859-rs9268644	http://www.ebi.ac.uk/efo/EFO_1001486	Cancer	http://www.ebi.ac.uk/efo/EFO_0000616
Prostate cancer	worry measurement	1377	74	0	1	1	0.0623267	0.0604502	0.372312	1	0.000689655	0.00137836	0.0010304	rs9281573-rs707928	http://www.ebi.ac.uk/efo/EFO_0009589	Other measurement	http://www.ebi.ac.uk/efo/EFO_0001444
Prostate cancer	mood instability measurement	1377	74	0	1	1	0.0623267	0.0604502	0.372312	1	0.000689655	0.00137836	0.0010304	rs10838703-rs2868996	http://www.ebi.ac.uk/efo/EFO_0008475	Other measurement	http://www.ebi.ac.uk/efo/EFO_0001444
Prostate cancer	HbA1c measurement	1377	75	0	1	1	0.063169	0.0612415	0.376319	1	0.00068918	0.00137741	0.00102975	rs78132593-rs267738	http://www.ebi.ac.uk/efo/EFO_0004541	Hematological measurement	http://www.ebi.ac.uk/efo/EFO_0004503
Prostate cancer	androgenetic alopecia	1377	80	0	1	1	0.0673803	0.0651884	0.399653	1	0.000686813	0.00137268	0.0010265	rs10888690-rs6678244	http://www.ebi.ac.uk/efo/EFO_0004191	Other disease	http://www.ebi.ac.uk/efo/EFO_0000408
Prostate cancer	resting heart rate	1377	85	0	1	1	0.0715915	0.0691187	0.421814	1	0.000684463	0.00136799	0.00102323	rs1716488-rs867400	http://www.ebi.ac.uk/efo/EFO_0004351	Cardiovascular measurement	http://www.ebi.ac.uk/efo/EFO_0004298
Prostate cancer	nasopharyngeal neoplasm	1377	86	0	1	1	0.0724338	0.0699028	0.425627	1	0.000683995	0.00136705	0.00102258	rs401681-rs2735948	http://www.ebi.ac.uk/efo/EFO_0004252	Cancer	http://www.ebi.ac.uk/efo/EFO_0000616
Prostate cancer	body fat percentage	1377	90	0	1	1	0.0758028	0.0730325	0.443673	1	0.000682128	0.00136333	0.00101996	rs9819144-rs1464419	http://www.ebi.ac.uk/efo/EFO_0007800	Body measurement	http://www.ebi.ac.uk/efo/EFO_0004324
Prostate cancer	Alzheimer's disease	1377	95	0	1	1	0.0800141	0.0769299	0.465234	1	0.00067981	0.0013587	0.00101669	rs10838725-rs10838703	NA	NA	NA
Prostate cancer	autoimmune disease	1377	97	0	1	1	0.0816986	0.0784842	0.473563	1	0.000678887	0.00135685	0.00101538	rs2768765-rs1800601	http://www.ebi.ac.uk/efo/EFO_0005140	Immune system disorder	http://www.ebi.ac.uk/efo/EFO_0000540
Prostate cancer	anxiety	1377	98	0	1	1	0.0825408	0.0792604	0.477169	1	0.000678426	0.00135593	0.00101473	rs10501320-rs10838703	http://www.ebi.ac.uk/efo/EFO_0005230	Other trait	http://www.ebi.ac.uk/efo/EFO_0000001
Prostate cancer	basophil count	1377	102	0	1	1	0.0859098	0.0823587	0.494707	1	0.00067659	0.00135227	0.00101212	rs34487581-rs12762973	http://www.ebi.ac.uk/efo/EFO_0005090	Inflammatory measurement	http://www.ebi.ac.uk/efo/EFO_0004872
Prostate cancer	Calcium channel blocker use measurement	1377	104	0	1	1	0.0875943	0.0839039	0.500614	1	0.000675676	0.00135044	0.00101081	rs3735533-rs12666259	http://www.ebi.ac.uk/efo/EFO_0009930	Other measurement	http://www.ebi.ac.uk/efo/EFO_0001444
Prostate cancer	age-related hearing impairment	1377	104	0	1	1	0.0875943	0.0839039	0.500614	1	0.000675676	0.00135044	0.00101081	rs1465618-rs4340576-rs1038822	http://www.ebi.ac.uk/efo/EFO_0005782	Neurological disorder	http://www.ebi.ac.uk/efo/EFO_0000618
Prostate cancer	central corneal thickness	1377	107	0	1	1	0.0901211	0.0862169	0.513269	1	0.000674309	0.00134771	0.00100886	rs880930-rs13429533-rs6740722	http://www.ebi.ac.uk/efo/EFO_0005213	Other measurement	http://www.ebi.ac.uk/efo/EFO_0001444
Prostate cancer	sleep duration	1377	116	0	1	1	0.0977014	0.0931208	0.551911	1	0.000670241	0.00133958	0.00100301	rs1611136-rs1633063	http://www.ebi.ac.uk/efo/EFO_0005271	Other measurement	http://www.ebi.ac.uk/efo/EFO_0001444
Prostate cancer	optic disc size measurement	1377	124	0	1	1	0.104439	0.0992138	0.586722	1	0.000666667	0.00133245	0.000997844	rs2244524-rs4285804-rs10786678	http://www.ebi.ac.uk/efo/EFO_0004832	Other measurement	http://www.ebi.ac.uk/efo/EFO_0001444
Prostate cancer	uric acid measurement	1377	126	0	1	1	0.106124	0.100731	0.594378	1	0.000665779	0.00133067	0.000996557	rs2306364-rs11227289-rs12576766	http://www.ebi.ac.uk/efo/EFO_0004761	Cardiovascular measurement	http://www.ebi.ac.uk/efo/EFO_0004298
Prostate cancer	mean corpuscular hemoglobin concentration	1377	129	0	1	1	0.108651	0.103001	0.606436	1	0.000664452	0.00132802	0.00099463	rs35135824-rs2942216-rs8534	http://www.ebi.ac.uk/efo/EFO_0004528	Hematological measurement	http://www.ebi.ac.uk/efo/EFO_0004503
Prostate cancer	metabolic syndrome	1377	132	0	1	1	0.111177	0.105266	0.617052	1	0.00066313	0.00132538	0.000992708	rs11751347-rs77009508-rs34747443	http://www.ebi.ac.uk/efo/EFO_0000195	Metabolic disorder	http://www.ebi.ac.uk/efo/EFO_0000589
Prostate cancer	Thyroid preparation use measurement	1377	132	1	0	1	0.111177	0.105266	0.617052	1	0.00066313	0.00132538	0.000992708	rs9469899	http://www.ebi.ac.uk/efo/EFO_0009933	Other measurement	http://www.ebi.ac.uk/efo/EFO_0001444
Prostate cancer	macula measurement	1377	136	0	1	1	0.114546	0.108277	0.633312	1	0.000661376	0.00132188	0.000990154	rs1531638-rs6151590	http://www.ebi.ac.uk/efo/EFO_0008375	Other measurement	http://www.ebi.ac.uk/efo/EFO_0001444
Prostate cancer	venous thromboembolism	1377	146	0	1	1	0.122969	0.11576	0.675601	1	0.00065703	0.0013132	0.000983809	rs1148764-rs971572	http://www.ebi.ac.uk/efo/EFO_0004286	Cardiovascular disease	http://www.ebi.ac.uk/efo/EFO_0000319
Prostate cancer	blood metabolite measurement	1377	156	0	1	1	0.131392	0.12318	0.71734	1	0.000652742	0.00130463	0.000977526	rs653753-rs316020	http://www.ebi.ac.uk/efo/EFO_0005664	Other measurement	http://www.ebi.ac.uk/efo/EFO_0001444
Prostate cancer	hematocrit	1377	158	0	1	1	0.133076	0.124656	0.724361	1	0.00065189	0.00130293	0.000976277	rs4364506-rs7740107	http://www.ebi.ac.uk/efo/EFO_0004348	Hematological measurement	http://www.ebi.ac.uk/efo/EFO_0004503
Prostate cancer	systemic lupus erythematosus	1377	172	0	1	1	0.144868	0.134923	0.782316	1	0.000645995	0.00129116	0.000967607	rs9469899-rs9462027	NA	NA	NA
Prostate cancer	bone density	1377	184	0	1	1	0.154975	0.143626	0.830982	1	0.000641026	0.00128123	0.00096028	rs757138-rs217-rs10486567	http://www.ebi.ac.uk/efo/EFO_0003923	Other measurement	http://www.ebi.ac.uk/efo/EFO_0001444
Prostate cancer	visceral adipose tissue measurement	1377	211	1	0	1	0.177715	0.162892	0.940409	1	0.00063012	0.00125945	0.00094415	rs9469899	http://www.ebi.ac.uk/efo/EFO_0004765	Other measurement	http://www.ebi.ac.uk/efo/EFO_0001444
Prostate cancer	smoking behavior	1377	230	1	0	1	0.193718	0.176188	1	1	0.000622665	0.00124456	0.000933094	rs12764388	http://www.ebi.ac.uk/efo/EFO_0004318	Biological process	http://purl.obolibrary.org/obo/GO_0008150
Prostate cancer	acute myeloid leukemia	1377	2598	0	4	4	2.18817	0.178134	1	1	0.0010073	0.00201258	0.00302678	rs594709-rs628031|rs55916270-rs3914303|rs2285883-rs55987972|rs117647783-rs454150	http://www.ebi.ac.uk/efo/EFO_0000222	Cancer	http://www.ebi.ac.uk/efo/EFO_0000616
Prostate cancer	diffuse plaque measurement	1377	310	0	1	1	0.261099	0.229899	1	1	0.00059312	0.00118554	0.000889122	rs344141-rs13138237	http://www.ebi.ac.uk/efo/EFO_0010699	Other measurement	http://www.ebi.ac.uk/efo/EFO_0001444
Prostate cancer	DNA methylation	1377	418	0	1	1	0.352062	0.296899	1	1	0.000557414	0.00111421	0.000835794	rs11067004-rs759928-rs11287702	http://purl.obolibrary.org/obo/GO_0006306	Biological process	http://purl.obolibrary.org/obo/GO_0008150

## Sheet: Supplementary File 1C
Protein	Outcome	Method	Main MR results								Egger					Egger Intercept		Weighted Median					Heterogeneity				Coloc					MR-PRESSO			MR-PRESSO corrected
																							Egger		IVW
			nSNPs	Beta	CI95 low	CI95 high	SE	P-value	Padj (fdr5%)	Padj (Bon)	Beta	CI95 low	CI95 high	SE	P-value	SE	P-value	Beta	CI95 low	CI95 high	SE	P-value	Q	P-value	Q	P-value	PPH0	PPH1	PPH2	PPH3	PPH4	Beta	SE	P-value	Beta	SE	P-value
MSMB	Prostate Cancer	IVW	59	-0.150192	0.837556	0.88416	0.0138138	1.55631e-27	2.81693e-24	2.81693e-24	-0.14147	0.815928	0.923568	0.031612	3.70429e-05	0.00802898	0.759719	-0.133387	0.849008	0.902048	0.0154591	6.22227e-18	128.266	2.08242e-07	128.479	2.99004e-07	0	8.88064e-18	0	1.86343e-10	1	-0.150192	0.0138138	1.27578e-15	-0.150708	0.0123605	2.15146e-17
PRSS3	Prostate Cancer	IVW	56	-0.0771776	0.910011	0.941711	0.00873529	9.99665e-19	6.03131e-16	1.80939e-15	-0.0579575	0.916377	0.971817	0.0149846	0.000297495	0.00300508	0.120259	-0.0725003	0.906092	0.954673	0.0133235	5.28214e-08	47.6427	0.71657	50.1348	0.660641	0	0.00011113	0	0.0439967	0.955892	-0.0771776	0.00833999	8.3204e-13
HSPA1A	Prostate Cancer	IVW	17	-0.320629	0.656683	0.801954	0.0509819	3.19356e-10	9.6339e-08	5.78034e-07	-0.236807	0.576632	1.07997	0.160073	0.159737	0.0150357	0.587856	-0.30951	0.669656	0.804102	0.0466739	3.32658e-11	47.7612	2.7787e-05	48.7378	3.63498e-05	3.04277e-34	9.16418e-12	3.32028e-23	1	4.48303e-12	-0.320629	0.0509819	1.07864e-05	-0.365317	0.0398124	1.5301e-07
CTSB	Prostate Cancer	IVW	107	-0.0493437	0.936155	0.967816	0.00848505	6.04998e-09	1.36881e-06	1.09505e-05	-0.0342409	0.936741	0.996872	0.0158714	0.0332551	0.00284545	0.262971	-0.040179	0.938738	0.983007	0.0117553	0.000630921	145.818	0.00520603	147.577	0.00474272	0	0.423429	0	0.518753	0.0578186	-0.0493437	0.00848505	6.47045e-08
CREB3L4	Prostate Cancer	IVW	20	0.207801	1.14107	1.32795	0.0386914	7.84212e-08	1.05476e-05	0.000141942	0.168808	0.989939	1.41585	0.0912859	0.0809176	0.0118991	0.641323	0.193483	1.14056	1.29103	0.0316124	9.32985e-10	60.6383	1.61282e-06	61.3947	2.32377e-06	4.87314e-143	1.11344e-14	4.37667e-129	1	3.64952e-10	0.207801	0.0386914	3.49708e-05	0.205879	0.0333623	1.02576e-05
GSTO1	Prostate Cancer	IVW	113	-0.0372466	0.950414	0.976641	0.00694435	8.1584e-08	1.05476e-05	0.000147667	-0.0399356	0.937964	0.984297	0.0123	0.00154365	0.00308245	0.791204	-0.0405811	0.9429	0.977881	0.00929275	1.25986e-05	188.494	6.24772e-06	188.614	8.04616e-06	0	0.000439878	0	0.999403	0.00015671	-0.0372466	0.00694435	4.43991e-07	-0.0372263	0.00647924	8.27732e-08
SERPINA3	Prostate Cancer	IVW	44	0.0999606	1.06565	1.14606	0.0185571	7.17792e-08	1.05476e-05	0.00012992	0.146943	1.03084	1.30149	0.0594745	0.0221337	0.00579472	0.573357	0.12669	1.08397	1.18857	0.0234992	6.9965e-08	38.7447	0.0105274	39.3485	0.0128685	6.85389e-202	0.00535728	5.64056e-201	0.0431374	0.951505	0.117906	0.0305176	0.000840792	0.127627	0.0262175	8.1907e-05
ARL3	Prostate Cancer	IVW	11	-0.269456	0.691861	0.843208	0.0504666	9.33113e-08	1.12596e-05	0.000168893	-0.260503	0.617459	0.961882	0.113081	0.046717	0.0128842	0.930484	-0.206214	0.744325	0.889452	0.0454409	5.67748e-06	33.2546	0.000120582	33.2844	0.000243974	6.98499e-83	6.78358e-18	1.02969e-65	1	5.4595e-18	-0.269456	0.0504666	0.000328579	-0.194506	0.0394535	0.00081332
SCUBE3	Prostate Cancer	IVW	21	-0.12313	0.844924	0.925194	0.0231523	1.04752e-07	1.18501e-05	0.000189602	-0.155182	0.786147	0.932624	0.0435865	0.0020886	0.00553414	0.395135	-0.141892	0.823063	0.91479	0.0269545	1.40864e-07	28.6826	0.071145	29.8253	0.0727342	6.68166e-118	5.19579e-06	1.28596e-112	0.999989	5.32845e-06	-0.12313	0.0231523	3.32142e-05
PLG	Prostate Cancer	IVW	47	-0.171137	0.788878	0.900207	0.0336769	3.74027e-07	3.76104e-05	0.000676988	-0.123296	0.78398	0.996784	0.0612629	0.0501669	0.00853318	0.354588	-0.17917	0.797199	0.876613	0.0242249	1.40213e-13	370.232	1.07515e-52	404.973	6.46005e-63	5.4403e-158	3.57054e-38	1.52366e-120	1	6.42377e-40	-0.171137	0.0336769	6.6785e-06	-0.15445	0.0243776	4.12094e-07
ACP6	Prostate Cancer	IVW	93	0.0277459	1.01698	1.03941	0.00556402	6.14311e-07	5.85212e-05	0.0011119	0.0156905	0.996746	1.03525	0.00966816	0.108069	0.00283601	0.130798	0.0282904	1.00962	1.04813	0.00955097	0.00305604	85.9106	0.63113	88.2353	0.591758	0	0.830856	0	0.098395	0.0707495	0.0277459	0.00544899	1.87322e-06
TPST1	Prostate Cancer	IVW	26	0.0682799	1.04203	1.10009	0.0138312	7.94728e-07	7.17433e-05	0.00143846	0.0671278	1.01463	1.1272	0.0268398	0.019608	0.00489198	0.960465	0.0833993	1.04659	1.12891	0.0193151	1.57575e-05	22.5834	0.544487	22.5859	0.601728	6.42259e-199	0.353903	3.8713e-199	0.212886	0.433211	0.0682799	0.0131465	2.25914e-05
PTK7	Prostate Cancer	IVW	4	0.25576	1.16353	1.43342	0.0532168	1.53974e-06	0.000121171	0.00278693	0.487253	0.858413	3.08693	0.326491	0.274137	0.0322225	0.546978	0.255987	1.13404	1.47136	0.0664269	0.000116364	1.51643	0.468501	2.03288	0.56561	6.68837e-14	0.124203	4.49306e-13	0.834321	0.0414763	0.25576	0.043807	0.0100124
BPIFB1	Prostate Cancer	IVW	61	-0.0573067	0.922289	0.966845	0.0120357	1.92258e-06	0.000144994	0.00347986	-0.06346	0.894304	0.984905	0.0246173	0.0124586	0.00449121	0.774935	-0.0404647	0.929943	0.991737	0.0164119	0.0136796	102.395	0.000396821	102.538	0.000518231	0	0.0103814	0	0.989492	0.000126681	-0.0573067	0.0120357	1.2561e-05	-0.0446207	0.0104856	7.71291e-05
CRHBP	Prostate Cancer	IVW	85	0.0437603	1.02544	1.06438	0.00950836	4.17855e-06	0.000302527	0.00756318	0.0348803	1.00278	1.06928	0.0163791	0.0361694	0.00264145	0.506645	0.0575549	1.02816	1.09127	0.0151958	0.00015213	104.539	0.0551952	105.099	0.0594948	0	0.492181	0	0.482257	0.0255619	0.0437603	0.00950836	1.46785e-05
CHMP2B	Prostate Cancer	IVW	28	0.234357	1.14213	1.39909	0.0517665	5.97706e-06	0.00039872	0.0108185	0.163991	0.952195	1.45786	0.108662	0.143307	0.0134726	0.466898	0.229551	1.19246	1.32722	0.027314	4.30905e-17	224.11	1.97969e-33	228.81	7.27378e-34	3.73831e-226	4.89932e-50	7.63027e-177	1	1.91818e-36	0.234357	0.0517665	0.00010848	0.22642	0.0266917	2.20161e-08
PLXND1	Prostate Cancer	IVW	36	-0.081242	0.89009	0.954993	0.0179545	6.04307e-06	0.00039872	0.010938	-0.070871	0.867486	1.00041	0.0363699	0.0596323	0.0053278	0.74396	-0.0732542	0.885037	0.975912	0.0249345	0.00330485	48.7951	0.0481284	48.9507	0.0589279	4.56962e-130	3.13094e-07	1.4595e-123	0.999999	6.60264e-07	-0.081242	0.0179545	6.67668e-05
ALAD	Prostate Cancer	IVW	33	0.079866	1.04545	1.12219	0.0180704	9.88372e-06	0.000596318	0.0178895	0.0824624	1.02257	1.15328	0.0306857	0.0114773	0.00443439	0.916588	0.0828084	1.03956	1.13521	0.0224537	0.000226062	40.441	0.119394	40.4555	0.145082	2.22714e-169	0.808206	2.18065e-170	0.0790207	0.112773	0.079866	0.0180704	0.000106315
ALDH3B1	Prostate Cancer	IVW	3	-0.223113	0.724668	0.883218	0.050474	9.85439e-06	0.000596318	0.0178364	-0.196243	0.657038	1.02791	0.114169	0.335441	0.00971908	0.836642	-0.217363	0.722272	0.896396	0.0550969	7.97644e-05	0.790472	0.373957	0.859319	0.650731	2.84229e-43	0.00280502	1.0018e-40	0.988654	0.00854112
ZG16B	Prostate Cancer	IVW	9	0.199295	1.1146	1.33656	0.0463282	1.69418e-05	0.000989182	0.0306647	0.0963564	0.899476	1.34805	0.103214	0.381606	0.0119225	0.302846	0.166728	1.09463	1.27511	0.0389329	1.84859e-05	14.346	0.0453581	16.8805	0.0313781	7.66653e-98	0.0761908	2.88157e-97	0.285735	0.638074	0.199295	0.0463282	0.00260941
RET	Prostate Cancer	IVW	52	-0.0426989	0.939441	0.977334	0.0100876	2.30806e-05	0.0012287	0.0417759	-0.0359631	0.92912	1.00159	0.0191605	0.0663678	0.00322023	0.681015	-0.04348	0.930257	0.985441	0.0147011	0.00310041	40.4782	0.829585	40.6492	0.850025	4.07969e-291	0.790954	9.42644e-292	0.18273	0.0263166	-0.0426989	0.00900597	1.74643e-05
PPP1R14A	Prostate Cancer	IVW	13	0.266	1.14968	1.4807	0.0645471	3.77205e-05	0.00195069	0.068274	0.0777893	0.848931	1.37624	0.123248	0.540829	0.0143662	0.108785	0.2253	1.1678	1.34377	0.0358054	3.12705e-10	58.0333	2.14536e-08	74.1016	5.4304e-11	1.16957e-140	9.91551e-50	1.17953e-91	1	2.03326e-32	0.266	0.0645471	0.00141808	0.214685	0.0381185	0.000491564
IGFBP1	Prostate Cancer	IVW	3	0.267933	1.14649	1.49057	0.0669512	6.28315e-05	0.00315903	0.113725	-0.260303	0.0185638	32.0065	1.90114	0.913373	0.141399	0.827364	0.262987	1.11475	1.51792	0.0787537	0.000839724	0.0984008	0.753757	0.175698	0.915899	9.82951e-16	0.14451	5.69778e-15	0.837647	0.0178429
CD160	Prostate Cancer	IVW	3	-0.194811	0.74637	0.907475	0.0498581	9.33292e-05	0.00452311	0.168926	0.0155832	0.997896	1.03383	0.00902522	0.0863932	0.0455431	0.615465	-0.188905	0.747615	0.916729	0.0520212	0.000281985	0.292005	0.588939	0.768193	0.681066	5.46311e-50	0.938285	1.42541e-51	0.024444	0.0372705
SERPINA3	Prostate Cancer	IVW	23	0.117906	1.05981	1.19449	0.0305176	0.000111757	0.00518665	0.202279	0.106833	1.03793	1.19295	0.0355103	0.00442351	0.00359066	0.820779	0.162566	1.10227	1.25578	0.0332609	1.02076e-06	63.0864	0.0192261	63.1644	0.0241601	1.87882e-123	0.0053995	1.54621e-122	0.0434853	0.951115	0.0999606	0.0185571	2.82871e-06	0.105579	0.0169359	1.82893e-07
BTNL8	Prostate Cancer	IVW	4	0.223613	1.11562	1.40188	0.0582648	0.000124107	0.00561583	0.224633	0.237494	0.993808	1.61801	0.124339	0.196315	0.0166968	0.910994	0.21492	1.09434	1.40451	0.063658	0.000735021	0.543169	0.762171	0.55914	0.905719	2.70178e-71	0.768445	8.01606e-72	0.227991	0.0035638	0.223613	0.0251539	0.00300166
SERPINA4	Prostate Cancer	IVW	104	0.0384359	1.01893	1.05984	0.0100413	0.000129313	0.00570869	0.234056	0.037758	1.0046	1.0735	0.0169235	0.0278637	0.00246832	0.960305	0.0198893	0.993488	1.0474	0.013481	0.140118	154.444	0.000624403	154.448	0.000782259	0	0.10827	0	0.891076	0.00065405	0.0384359	0.0100413	0.000222195
FAS	Prostate Cancer	IVW	26	-0.0669325	0.903464	0.968171	0.0176461	0.000148811	0.00641303	0.269347	-0.0782172	0.867814	0.98545	0.0324289	0.0238757	0.00416558	0.681999	-0.0663204	0.889606	0.984458	0.0258449	0.0102852	20.0294	0.695105	19.5422	0.770409	1.54726e-122	0.000159269	9.713e-119	0.999816	2.49052e-05	-0.064385	0.0160466	0.000479929
CXCL6	Prostate Cancer	IVW	96	0.0422763	1.02048	1.06639	0.0112249	0.000165676	0.00692402	0.299873	0.0185109	0.977988	1.06107	0.0208003	0.375773	0.00441052	0.178761	0.0240568	0.997534	1.05188	0.0135335	0.0754743	216.558	1.145e-11	2.49521	0.777217	0	8.81879e-12	0	1	3.43132e-13	0.0422763	0.0112249	0.000287158	0.0341896	0.0103405	0.00134888
DPT	Prostate Cancer	IVW	75	-0.0335995	0.950181	0.984033	0.00893044	0.000168319	0.00692402	0.304657	-0.0405734	0.93305	0.98822	0.0146547	0.00713111	0.00225498	0.550231	-0.0238967	0.950407	1.00308	0.0137593	0.082428	64.9235	0.738607	65.2837	0.755317	0	0.747964	0	0.249274	0.0027626	-0.0335995	0.00838802	0.000145766
KLK3	Prostate Cancer	IVW	2	1.5862	2.13053	11.2013	0.423382	0.000179318	0.00705577	0.324565															17.8516	2.38816e-05	1.70449e-93	3.83008e-91	0.00443036	0.995526	4.33529e-05	1.98094	0.00350135
F11	Prostate Cancer	IVW	43	0.0450881	1.02153	1.0713	0.0121372	0.000203315	0.0075011	0.367999	0.0483276	1.00167	1.09965	0.0238072	0.0488835	0.00385601	0.874576	0.0392953	1.00574	1.07559	0.0171303	0.0217956	44.511	0.326218	44.5384	0.365409	0	0.881575	0	0.102287	0.0161376	0.0450881	0.0121372	0.000593999
FGFR3	Prostate Cancer	IVW	24	0.115392	1.05594	1.19286	0.0311024	0.000207213	0.0075011	0.375055	0.216689	1.06087	1.45396	0.0804089	0.0132309	0.009557	0.187035	0.0763924	1.00753	1.15637	0.0351479	0.0297462	41.5044	0.00717297	45.0032	0.00397109	1.77901e-70	0.0263271	6.57796e-69	0.973455	0.000218368	0.115392	0.0311024	0.00115242	0.0998459	0.0286104	0.00207401
TFF1	Prostate Cancer	IVW	29	0.0707426	1.03377	1.11436	0.0191503	0.000220698	0.0078326	0.399463	0.0428144	0.969642	1.12351	0.037573	0.264505	0.00585602	0.394487	0.0585702	1.00727	1.11616	0.0261871	0.0253121	43.9231	0.0210592	45.1412	0.0213465	0	1.83694e-08	0	1	2.24426e-10	0.0707426	0.0191503	0.000948266	0.106625	0.0196148	9.46281e-06
IL15RA	Prostate Cancer	IVW	90	0.0339215	1.0159	1.05345	0.0092592	0.000248754	0.00865854	0.450244	0.0243883	0.98951	1.06112	0.0178231	0.174685	0.00300348	0.53243	0.0163242	0.992371	1.04113	0.0122362	0.182174	130.371	0.00226779	130.953	0.00254216	0	0.0137482	0	0.98615	0.000101622	0.0339215	0.0092592	0.000422091
PCYOX1	Prostate Cancer	IVW	80	-0.0274111	0.958734	0.987399	0.00751537	0.000264971	0.009049	0.479597	-0.0275489	0.950382	0.995803	0.0119095	0.0233488	0.00222818	0.98809	-0.0195324	0.95702	1.00488	0.0124481	0.116622	79.6483	0.426864	79.6485	0.458393	0	0.882393	0	0.0897283	0.0278786	-0.0274111	0.00751537	0.00047326
CD68	Prostate Cancer	IVW	8	0.18578	1.08796	1.33276	0.0517712	0.000332612	0.011051	0.602029	0.0477543	0.813264	1.35284	0.129823	0.725619	0.0144979	0.29036	0.185859	1.0475	1.38446	0.0711501	0.00899578	5.36238	0.498243	6.70649	0.460066	6.21335e-32	1.95841e-16	3.17265e-16	1	1.2062e-17
SHMT1	Prostate Cancer	IVW	91	0.0291955	1.01333	1.04619	0.00814153	0.000335803	0.011051	0.607803	0.0334932	1.00707	1.06177	0.0134927	0.0149297	0.00310335	0.689739	0.0322555	1.00956	1.05654	0.0116023	0.00543434	126.679	0.00537888	126.907	0.00632611	0	0.202994	0	0.780997	0.016009	0.0291955	0.00814153	0.000545336	0.0319164	0.00775972	8.68697e-05
B3GNT8	Prostate Cancer	IVW	148	0.032035	1.01457	1.05086	0.00896648	0.000353248	0.0114175	0.639379	0.0267169	0.999471	1.05545	0.0139011	0.0565627	0.00316086	0.616739	0.0312834	1.0138	1.05007	0.00896774	0.000485853	409.756	7.07185e-27	410.462	9.4727e-27	0	1.18213e-27	0	1	1.87681e-27	0.032035	0.00896648	0.000478095	0.0301935	0.0073396	6.56352e-05
MLN	Prostate Cancer	IVW	102	-0.0472337	0.929332	0.979044	0.0132936	0.000380674	0.0120881	0.68902	-0.0257444	0.930049	1.02125	0.023864	0.283275	0.0036268	0.281021	-0.0381643	0.938089	0.987659	0.0131359	0.00366847	313.749	6.74765e-24	317.435	3.3802e-24	0	8.05085e-06	0	0.999992	3.53989e-08	-0.0472337	0.0132936	0.000580437	-0.0240378	0.0108478	0.0291647
FAS	Prostate Cancer	IVW	26	-0.064385	0.904875	0.971599	0.0181495	0.000388944	0.0121377	0.703989	-0.0941368	0.85492	0.968966	0.0319443	0.00703763	0.00379046	0.268907	-0.0679603	0.885777	0.985476	0.0272093	0.0125008	18.2612	0.790155	20.2014	0.736183	3.62541e-131	0.000159269	2.27586e-127	0.999816	2.49052e-05	-0.0669325	0.0158624	0.000281423
PSME2	Prostate Cancer	IVW	7	-0.157495	0.782925	0.93214	0.0445018	0.000401522	0.0123179	0.726755	-0.197433	0.67453	0.998873	0.100156	0.105754	0.0123943	0.674851	-0.121129	0.797943	0.983595	0.0533614	0.0232089	1.72589	0.885622	1.92401	0.926553	6.05972e-31	0.831497	1.091e-31	0.149685	0.0188179	-0.157495	0.0252003	0.000777908
IL1R2	Prostate Cancer	IVW	66	0.0373302	1.01672	1.0598	0.0105859	0.000421231	0.0124492	0.762428	0.0159433	0.970883	1.06336	0.0232104	0.494626	0.00390673	0.30445	0.046426	1.01545	1.0806	0.0158648	0.00342961	80.3863	0.0810176	81.7324	0.0785293	0	0.845615	0	0.147947	0.00643752	0.0373302	0.0105859	0.000778028
RALB	Prostate Cancer	IVW	13	0.0951425	1.04321	1.1595	0.0269612	0.000417349	0.0124492	0.755402	0.0782392	0.965653	1.21098	0.0577501	0.202656	0.0075028	0.744125	0.0987015	1.04591	1.16476	0.0274553	0.000324399	17.7536	0.0874758	17.9345	0.117695	3.41566e-164	0.0395219	8.19438e-163	0.948144	0.0123337	0.0951425	0.0269612	0.0041551
CRISP2	Prostate Cancer	IVW	72	0.023311	1.01035	1.03699	0.00663882	0.000445885	0.0125589	0.807053	0.0111548	0.986685	1.03636	0.01253	0.376385	0.00356721	0.256945	0.022524	1.00506	1.04081	0.00891434	0.0115134	99.1854	0.0124352	101.036	0.011083	0	0.531246	0	0.458308	0.0104462	0.023311	0.00663882	0.000779298	0.0243192	0.00630148	0.000250411
KLB	Prostate Cancer	IVW	117	0.0268517	1.01194	1.04272	0.00764274	0.000442478	0.0125589	0.800886	0.0262271	1.00069	1.05312	0.0130277	0.0464314	0.00254333	0.95279	0.0239618	1.00219	1.0468	0.0111098	0.0310198	176.167	0.000212875	176.172	0.000267553	0	0.390305	0	0.607174	0.00252129	0.0268517	0.00764274	0.000631729	0.032282	0.0071979	1.74928e-05
NEU1	Prostate Cancer	IVW	6	0.313057	1.14816	1.62898	0.0892336	0.000451012	0.0125589	0.816331	0.166244	0.673667	2.06991	0.286359	0.592683	0.0170836	0.615112	0.178254	0.976047	1.46339	0.103316	0.0844675	8.93565	0.0627281	9.59765	0.0874722	2.04074e-16	9.16398e-12	2.22687e-05	0.999978	1.53438e-07	0.313057	0.0892336	0.0171321
SERPINF2	Prostate Cancer	IVW	16	0.109952	1.04884	1.18794	0.0317709	0.000538592	0.0147705	0.974851	0.125146	0.971236	1.32244	0.0787406	0.134303	0.00883158	0.834935	0.143198	1.06958	1.24499	0.03874	0.000218683	17.5032	0.230354	17.5595	0.286531	2.80348e-69	2.88097e-08	9.73102e-62	1	7.90738e-09	0.109952	0.0317709	0.00349362
LAMC2	Prostate Cancer	IVW	77	0.0358622	1.01559	1.05787	0.0104068	0.000568865	0.0153678	1	0.0544538	1.02129	1.09182	0.0170355	0.00203689	0.00314777	0.173614	0.0562033	1.02911	1.08732	0.0140373	6.23156e-05	123.901	0.000329232	127.019	0.000221094	0	1.71061e-05	0	0.999973	1.0227e-05	0.0358622	0.0104068	0.000929728	0.0387606	0.00886587	3.9093e-05
ITLN1	Prostate Cancer	IVW	10	0.1218	1.0533	1.21127	0.0356487	0.000633886	0.0168726	1	0.13581	1.03101	1.27262	0.0537088	0.0353306	0.00689343	0.725029	0.141812	1.06043	1.25226	0.0424183	0.000828204	10.4598	0.234224	10.6334	0.301677	5.86835e-43	0.715243	6.20833e-44	0.0754588	0.209298	0.1218	0.0356487	0.00766805
HSPB1	Prostate Cancer	IVW	65	0.0380399	1.01621	1.06184	0.0112049	0.000686464	0.0171098	1	0.0467161	1.00704	1.09027	0.0202578	0.0244086	0.00324082	0.608071	0.0527029	1.02092	1.08839	0.0163263	0.00124618	79.9938	0.0729611	80.3311	0.0816493	0	0.853111	0	0.142393	0.00449524	0.0380399	0.0112049	0.00118326
IL11RA	Prostate Cancer	IVW	24	0.0585653	1.02509	1.09675	0.0172362	0.000679291	0.0171098	1	0.0465855	0.999574	1.09812	0.0239856	0.0650205	0.00395847	0.475256	0.033143	0.99393	1.07506	0.0200161	0.0977595	30.0478	0.117307	30.7685	0.128588	0	0.00246622	0	0.997491	4.26571e-05	0.0585653	0.0172362	0.00247164
OLA1	Prostate Cancer	IVW	6	0.211365	1.09339	1.39577	0.0622852	0.000690063	0.0171098	1	0.0776375	0.662276	1.76358	0.249852	0.771522	0.0154655	0.609917	0.233772	1.08017	1.47761	0.0799241	0.00344536	2.96336	0.563975	3.26881	0.65862	3.45678e-58	0.00125023	2.76142e-55	0.998738	1.21675e-05	0.211365	0.0503611	0.00851425
SPARCL1	Prostate Cancer	IVW	87	0.0249568	1.01063	1.04012	0.0073367	0.000669828	0.0171098	1	0.0178992	0.993068	1.04368	0.0126813	0.161758	0.00263503	0.496218	0.0115296	0.989545	1.03414	0.0112445	0.305195	96.0486	0.193832	96.5764	0.204422	0	0.852009	0	0.130711	0.0172796	0.0249568	0.0073367	0.00101835
NFASC	Prostate Cancer	IVW	29	0.0474856	1.01992	1.07815	0.0141628	0.00079985	0.0190491	1	0.0497775	1.00559	1.09854	0.0225513	0.0359774	0.0039825	0.895826	0.0656299	1.02919	1.10793	0.0188057	0.000483217	30.8349	0.277972	30.8548	0.323564	1.75963e-276	7.19512e-20	2.44558e-257	1	2.76443e-20	0.0474856	0.0141628	0.00230608
NUDT9	Prostate Cancer	IVW	5	-0.127164	0.817197	0.948898	0.0381178	0.00084966	0.0199725	1	0.00568375	0.781902	1.29355	0.128424	0.96748	0.0123167	0.357983	-0.118923	0.813429	0.969137	0.0446803	0.00777602	0.378324	0.944683	1.5518	0.817428	1.10776e-30	0.858401	1.70439e-31	0.132064	0.00953579	-0.127164	0.0237419	0.00586154
RRM2B	Prostate Cancer	IVW	6	0.11662	1.04841	1.20438	0.0353797	0.000979933	0.0224516	1	0.0705775	0.959142	1.20066	0.0572928	0.285462	0.00597501	0.364682	0.0998177	1.02262	1.19395	0.0395162	0.0115371	2.28987	0.682614	3.33376	0.648677	3.66414e-68	0.00374312	9.75138e-66	0.996155	0.00010142	0.11662	0.0288893	0.00995434
SERPINA12	Prostate Cancer	IVW	115	0.0275822	1.0112	1.04501	0.00839047	0.00101144	0.0228839	1	0.0326873	1.00674	1.06042	0.013252	0.015142	0.0020216	0.618889	0.0278762	1.00392	1.0532	0.0122244	0.0225856	162.479	0.00159713	162.836	0.00183868	0	0.107962	0	0.88862	0.00341801	0.0275822	0.00839047	0.00134502
BST1	Prostate Cancer	IVW	184	0.0126121	1.00507	1.02037	0.00385538	0.00107051	0.0238335	1	0.0119262	1.00091	1.0232	0.00561828	0.0351263	0.001474	0.866897	0.0141069	1.0008	1.0278	0.00679167	0.0377927	179.282	0.543071	179.31	0.563268	0	0.7089	0	0.27897	0.0121301	0.0126121	0.00381632	0.00114357
GLIPR2	Prostate Cancer	IVW	31	-0.0643765	0.902104	0.974601	0.0197189	0.00109574	0.0238951	1	-0.0666094	0.864932	1.01196	0.0400485	0.10704	0.00455198	0.949083	-0.0763813	0.880431	0.974902	0.0260013	0.00330765	42.0603	0.0554624	42.0663	0.0706436	7.30451e-198	0.773251	1.0378e-198	0.109744	0.117004	-0.0643765	0.0197189	0.00273947
LGALSL	Prostate Cancer	IVW	3	0.289099	1.12193	1.58907	0.0888002	0.00113147	0.0240937	1	4.05028	0.263324	12518.2	2.74727	0.37943	0.449962	0.401457	0.320504	1.12869	1.68195	0.10176	0.00163488	0.119167	0.729939	1.99545	0.368716	2.30345e-24	8.18879e-14	2.81294e-11	1	5.48723e-12
TLR1	Prostate Cancer	IVW	8	-0.141043	0.797807	0.945351	0.0432882	0.00112103	0.0240937	1	-0.000771565	0.803932	1.24197	0.110953	0.994677	0.0104682	0.218839	-0.123661	0.796389	0.980538	0.0530647	0.0197864	3.62171	0.727712	5.50699	0.598341	5.58329e-55	0.40151	8.24121e-55	0.592642	0.00584808	-0.141043	0.0383952	0.00792786
POGLUT3	Prostate Cancer	IVW	16	-0.112788	0.834583	0.956234	0.0347119	0.00115708	0.0243525	1	-0.142313	0.789589	0.952769	0.0479235	0.0101448	0.00677221	0.383355	-0.134109	0.831943	0.919223	0.0254503	1.36816e-07	45.8209	2.99901e-05	48.4718	2.13371e-05	2.32428e-269	1.34767e-05	5.07622e-267	0.00194528	0.998041	-0.112788	0.0347119	0.00539155	-0.0625419	0.035631	0.106985
CST2	Prostate Cancer	IVW	86	-0.026349	0.95854	0.9897	0.00816097	0.00124373	0.0254212	1	-0.0247884	0.947464	1.0044	0.0148865	0.0996077	0.00267878	0.900546	-0.0335474	0.942351	0.992312	0.0131784	0.0109079	82.3865	0.529392	82.4022	0.559623	0	0.763714	0	0.232104	0.00418217	-0.026349	0.0080353	0.00151003
FCGR3A	Prostate Cancer	IVW	196	-0.0115262	0.981657	0.995472	0.00356503	0.00122449	0.0254212	1	-0.0182003	0.970233	0.993838	0.00613204	0.00337427	0.0017566	0.182557	-0.0141304	0.974433	0.997642	0.00600486	0.0186142	192.395	0.519073	194.185	0.503021	0	0.850788	0	0.141285	0.00792706	-0.0115262	0.00355757	0.00140587
NDST1	Prostate Cancer	IVW	10	0.0995912	1.03988	1.1736	0.0308597	0.00124999	0.0254212	1	0.0492738	0.924957	1.1931	0.0649397	0.469757	0.0076365	0.404204	0.12094	1.04299	1.22115	0.0402301	0.00264527	6.24819	0.619453	7.02368	0.634654	5.61822e-52	0.873454	5.33258e-53	0.082861	0.0436846	0.0995912	0.0272617	0.00529154
CNTFR	Prostate Cancer	IVW	17	-0.0888619	0.866736	0.965892	0.027632	0.00130034	0.026116	1	-0.105444	0.818313	0.989677	0.0485034	0.0461294	0.00635934	0.679374	-0.0768886	0.870454	0.985076	0.0315569	0.0148301	27.1913	0.0272162	27.5133	0.0361186	5.93651e-119	0.00246593	2.40114e-116	0.997393	0.000140781	-0.0888619	0.027632	0.00539431
GP5	Prostate Cancer	IVW	4	-0.26306	0.653818	0.903759	0.0825854	0.00144602	0.0284488	1	-0.511655	0.343173	1.0473	0.284625	0.21406	0.0305868	0.457756	-0.259126	0.626728	0.950271	0.106182	0.0146716	1.54099	0.462783	2.37397	0.498498	1.04766e-27	0.798477	2.37407e-28	0.18092	0.0206026	-0.26306	0.073465	0.0372666
LRIG3	Prostate Cancer	IVW	63	0.0277885	1.01061	1.04605	0.00879267	0.00157546	0.0306552	1	0.0209325	0.995362	1.04761	0.0130516	0.113919	0.0026753	0.478457	0.0425424	1.01615	1.07151	0.0135331	0.00166893	66.0704	0.306108	66.6213	0.321084	1.61851e-288	0.716958	5.7998e-289	0.25689	0.0261519	0.0277885	0.00879267	0.00243692
NPPB	Prostate Cancer	IVW	23	-0.0533934	0.9171	0.979955	0.0169108	0.00159204	0.0306552	1	0.240471	0.813689	1.98798	0.227882	0.401966	0.0183239	0.194467	-0.146116	0.757517	0.985583	0.0671395	0.0295328	1.91678	0.38351	21.2861	0.503121	1.23628e-189	0.856673	1.82082e-190	0.126155	0.0171719	-0.0533934	0.0166341	0.00403707
ITIH1	Prostate Cancer	IVW	68	0.0310905	1.01157	1.05198	0.00999286	0.00186287	0.0344061	1	0.0329905	0.993102	1.07563	0.0203634	0.109981	0.00383909	0.91484	0.0377347	1.01019	1.06751	0.0140802	0.0073626	88.1545	0.0356542	88.1699	0.0425681	0	0.826329	0	0.157139	0.0165315	0.0310905	0.00999286	0.00273691
ERAP2	Prostate Cancer	IVW	146	0.0120527	1.00441	1.0199	0.0039018	0.00200823	0.036349	1	0.0133563	1.00067	1.02639	0.00647414	0.0409073	0.00225628	0.800793	0.00898759	0.997035	1.02116	0.00610028	0.140668	174.535	0.0423086	174.613	0.0473173	0	0.700481	0	0.286893	0.0126262	0.0120527	0.0039018	0.0024076
ACE	Prostate Cancer	IVW	92	-0.0263016	0.957875	0.99048	0.0085388	0.00206835	0.0367031	1	-0.0102907	0.96095	1.01944	0.0150724	0.49652	0.00367936	0.201427	-0.0216056	0.957615	1.0001	0.0110733	0.0510394	140.859	0.000492488	143.451	0.000377038	0	0.520608	0	0.465844	0.013548	-0.0263016	0.0085388	0.00273532
NCAM1	Prostate Cancer	IVW	38	0.0518424	1.01874	1.08885	0.0169784	0.00226238	0.0397564	1	0.025123	0.964573	1.09015	0.0312208	0.426283	0.00463263	0.314735	0.0763501	1.03271	1.12808	0.0225343	0.000703595	50.7436	0.0525129	52.2089	0.0498421	1.82327e-148	7.21684e-12	2.52641e-137	1	1.12923e-12	0.0518424	0.0169784	0.00417627	0.0577103	0.0144409	0.000304742
LEAP2	Prostate Cancer	IVW	39	-0.0780265	0.879606	0.97261	0.02564	0.00234115	0.0407451	1	-0.10259	0.818298	0.995359	0.0499687	0.0471848	0.00547914	0.569058	-0.0544399	0.890366	1.00727	0.0314708	0.0836568	70.4559	0.000748065	71.0845	0.000906149	4.13537e-290	0.511454	3.60462e-290	0.445769	0.0427768	-0.0780265	0.02564	0.00423258	-0.0619073	0.0247992	0.0171298
ST3GAL1	Prostate Cancer	IVW	29	-0.0516695	0.918386	0.981963	0.0170756	0.0024787	0.0427281	1	-0.0354632	0.902905	1.0317	0.0340176	0.306427	0.00393014	0.586278	-0.0495689	0.906328	0.999217	0.0248905	0.0464281	23.6967	0.64708	24.0001	0.681528	6.55495e-201	0.781111	1.73396e-201	0.206613	0.0122763	-0.0516695	0.015809	0.00286244
PLTP	Prostate Cancer	IVW	87	0.0303741	1.01064	1.05144	0.0100969	0.00262738	0.0444445	1	0.0346542	1.00123	1.07045	0.0170528	0.045259	0.00309289	0.755541	0.0254449	0.997789	1.05454	0.0141112	0.0713622	132.991	0.00068177	133.144	0.000844961	0	0.219513	0	0.77828	0.00220724	0.0303741	0.0100969	0.00344563
KLK11	Prostate Cancer	IVW	84	-0.0344085	0.944697	0.988145	0.0114705	0.00270217	0.0452863	1	-0.0417914	0.925545	0.993809	0.0181534	0.0238639	0.00278311	0.60013	-0.0378574	0.93977	0.986497	0.012379	0.00222671	163.68	2.22178e-07	164.232	2.76039e-07	0	3.84729e-91	0	1	4.59817e-93	-0.0344085	0.0114705	0.0035664	-0.0381931	0.00939315	0.000109184
IL1R1	Prostate Cancer	IVW	27	-0.0619735	0.901906	0.979511	0.021057	0.0032491	0.0529809	1	-0.0132675	0.903119	1.07828	0.045221	0.771644	0.00468692	0.23607	-0.0723669	0.882692	0.980242	0.0267406	0.00680466	31.5505	0.171432	33.4107	0.150515
PDGFRB	Prostate Cancer	IVW	181	0.0114282	1.00383	1.01921	0.00387966	0.00322251	0.0529809	1	0.00867941	0.995582	1.02203	0.00668755	0.19601	0.00183683	0.61444	0.00854481	0.996838	1.02046	0.00597562	0.152733	138.835	0.988405	139.09	0.98954
LRP8	Prostate Cancer	IVW	12	-0.0803187	0.874525	0.973786	0.0274262	0.00340562	0.0550372	1	-0.126475	0.760179	1.02148	0.0753705	0.124267	0.00947979	0.525728	-0.0827695	0.859387	0.986095	0.035085	0.0183187	6.37217	0.783086	6.80443	0.814693
KLK7	Prostate Cancer	IVW	21	-0.0559723	0.910761	0.9817	0.019134	0.00344145	0.055124	1	-0.0472711	0.885029	1.02798	0.0381958	0.230941	0.00500201	0.79522	-0.0585532	0.897666	0.990892	0.025206	0.0201798	15.9602	0.659934	16.0295	0.714795
NUDT2	Prostate Cancer	IVW	39	0.0390444	1.0129	1.06745	0.0133806	0.00352315	0.0559377	1	0.0124707	0.964022	1.06352	0.0250573	0.62165	0.00356966	0.218902	0.0278468	0.991365	1.06648	0.0186321	0.135029	37.4777	0.447173	39.0621	0.421873
RPS6KA1	Prostate Cancer	IVW	4	-0.170645	0.751711	0.945647	0.0585503	0.00356261	0.0560724	1	-0.457216	0.337235	1.18832	0.321305	0.290708	0.0266617	0.460107	-0.172746	0.740542	0.955883	0.0651157	0.00798006	0.19842	0.905553	1.02122	0.796117
PRG3	Prostate Cancer	IVW	2	0.224382	1.07589	1.45589	0.0771619	0.00363828	0.0567698	1															0.323412	0.569564
NAPG	Prostate Cancer	Wald ratio	1	0.278836	1.09432	1.59606	0.0962779	0.00377757	0.0584393	1
FLII	Prostate Cancer	IVW	3	-0.202379	0.711572	0.937556	0.0703572	0.0040217	0.0613571	1	-0.158904	0.558865	1.30218	0.215788	0.595916	0.0402811	0.861287	-0.208756	0.689218	0.955698	0.0833889	0.0123006	1.61755	0.203433	1.69685	0.428089
PCNP	Prostate Cancer	IVW	2	-0.194467	0.721069	0.939964	0.0676291	0.00403398	0.0613571	1															0.251474	0.616039
CD177	Prostate Cancer	IVW	145	0.0139287	1.00443	1.02371	0.00484966	0.00407748	0.061502	1	-0.0258248	0.670433	1.41649	0.19082	0.914363	0.00259066	0.828001	0.0147413	1.0004	1.02951	0.00731834	0.0439782	166.805	0.0845334	166.86	0.0933337
AIF1	Prostate Cancer	IVW	27	-0.176864	0.742509	0.945532	0.0616614	0.00412669	0.0617298	1	0.0149637	0.79368	1.29823	0.12553	0.906066	0.0118669	0.095108	-0.111325	0.82954	0.964867	0.038551	0.0038804	189.422	3.27599e-27	212.223	3.95131e-31
CST5	Prostate Cancer	IVW	105	0.0200305	1.00631	1.03434	0.00700806	0.00426047	0.0622399	1	0.0417797	1.01873	1.06716	0.0118461	0.000629407	0.00263337	0.0262866	0.0347596	1.01564	1.05549	0.00981751	0.000399258	133.705	0.022597	140.302	0.0102401
LINGO1	Prostate Cancer	IVW	3	-0.166832	0.75497	0.948772	0.0582883	0.00420722	0.0622399	1	-0.62347	0.194382	1.47844	0.517582	0.441091	0.0433705	0.537757	-0.21094	0.709025	0.924949	0.0678185	0.00186855	0.753796	0.385277	1.54216	0.462513
LUM	Prostate Cancer	IVW	17	0.0866528	1.0276	1.15729	0.03032	0.00426395	0.0622399	1	0.0306094	0.940391	1.13052	0.0469741	0.524503	0.0062437	0.148973	0.0500791	0.979822	1.12811	0.0359506	0.163621	22.0995	0.105222	25.5094	0.0613346
IL5RA	Prostate Cancer	IVW	87	-0.0247813	0.959061	0.992269	0.00868355	0.00431968	0.062549	1	-0.019539	0.951495	1.0107	0.015399	0.207959	0.0022476	0.68053	-0.0292786	0.946155	0.996797	0.0133013	0.0277224	86.293	0.440473	86.4663	0.465601
CCN4	Prostate Cancer	IVW	139	0.0191341	1.00593	1.03288	0.00674433	0.00455306	0.0648901	1	0.0118203	0.98912	1.03519	0.0116123	0.310513	0.00199936	0.4401	0.0128501	0.990431	1.03595	0.011462	0.262242	142.913	0.347408	143.538	0.356063
GKN2	Prostate Cancer	IVW	45	0.0369238	1.0115	1.06441	0.0130069	0.0045284	0.0648901	1	0.0330185	0.996677	1.07183	0.0185445	0.0820596	0.00279391	0.766741	0.0366628	1.00303	1.07283	0.0171607	0.0326434	58.1036	0.0618327	58.2241	0.0738726
ASRGL1	Prostate Cancer	IVW	20	0.0869031	1.02702	1.15852	0.0307351	0.00469149	0.0663406	1	0.0366646	0.927674	1.15998	0.0570102	0.528252	0.00701259	0.30974	0.062778	1.00612	1.12688	0.0289147	0.0299202	42.5167	0.000936108	45.0974	0.00066421
ARL4D	Prostate Cancer	Wald ratio	1	0.385777	1.12377	1.92489	0.137292	0.00495554	0.0671602	1
ART4	Prostate Cancer	IVW	137	-0.0153855	0.974246	0.995331	0.00546206	0.0048505	0.0671602	1	-0.0167896	0.965976	1.00104	0.00909539	0.0670906	0.00234745	0.846899	-0.0100091	0.974519	1.00581	0.00806211	0.21442	55.3677	0.0266028	55.7496	0.0315444
CLSTN1	Prostate Cancer	IVW	20	-0.0634504	0.897874	0.981008	0.0225896	0.00497208	0.0671602	1	-0.0725692	0.875695	0.987675	0.030698	0.0295267	0.00673213	0.657737	-0.0642509	0.900136	0.976977	0.0208973	0.00210779	38.3581	0.00347196	38.7906	0.00470075
FGFR1	Prostate Cancer	IVW	5	-0.14319	0.784245	0.95758	0.0509406	0.00494011	0.0671602	1	-0.0640912	0.548706	1.60321	0.273521	0.829818	0.0204213	0.786599	-0.135247	0.769395	0.991691	0.0647465	0.0367193	3.99151	0.262382	4.10801	0.391585
KIAA1549L	Prostate Cancer	IVW	43	-0.0377561	0.937971	0.98859	0.0134082	0.00486407	0.0671602	1	-0.0574081	0.885569	1.00673	0.0327128	0.0867453	0.00506983	0.51383	-0.0493544	0.915681	0.989434	0.0197616	0.0125075	34.511	0.752885	34.9448	0.771498
UBE2C	Prostate Cancer	IVW	5	-0.143213	0.78433	0.957431	0.0508734	0.00487633	0.0671602	1	-0.0707911	0.73762	1.17674	0.119151	0.594249	0.0140531	0.54309	-0.174229	0.75813	0.930943	0.0523836	0.000880949	6.001	0.111562	6.93678	0.139267
TLR2	Prostate Cancer	Wald ratio	1	-0.395253	0.510625	0.888353	0.141259	0.00514071	0.0689236	1
PCBD1	Prostate Cancer	IVW	22	0.0686707	1.02065	1.12401	0.0246066	0.00525877	0.0699881	1	0.036568	0.908336	1.18445	0.0677085	0.595105	0.0066941	0.616372	0.0934309	1.02549	1.1755	0.034829	0.00730611	13.9558	0.832728	14.2148	0.860195
PTGR1	Prostate Cancer	IVW	96	0.0217017	1.00642	1.0377	0.00780751	0.00544273	0.0719076	1	0.0120257	0.984415	1.04056	0.0141498	0.39755	0.00271957	0.413969	0.018347	0.995909	1.04164	0.0114524	0.10915	109.689	0.128372	110.474	0.132501
COLEC10	Prostate Cancer	IVW	2	0.294952	1.0905	1.65411	0.106282	0.00551722	0.0723636	1															0.10588	0.744884
LEFTY2	Prostate Cancer	IVW	121	-0.0179882	0.969721	0.994785	0.00650978	0.00572281	0.0745201	1	-0.0344879	0.815597	1.14437	0.0864013	0.695401	0.0105505	0.839435	-0.0152093	0.969251	1.00081	0.00817442	0.0628008	28.6831	0.0176636	200.161	6.12847e-06
EFNA3	Prostate Cancer	Wald ratio	1	0.481399	1.14761	2.28214	0.175364	0.00604854	0.078199	1
CTSF	Prostate Cancer	IVW	18	0.115281	1.03329	1.21873	0.0421084	0.0061868	0.0792587	1	0.0310664	0.853398	1.2469	0.0967323	0.752248	0.00957119	0.347716	0.029219	0.95878	1.10576	0.0363841	0.421935	47.821	5.06749e-05	50.6184	3.38461e-05
INHBC	Prostate Cancer	IVW	112	0.0133075	1.00378	1.0231	0.00486374	0.00621809	0.0792587	1	0.00348264	0.986499	1.02077	0.00871218	0.690121	0.00324088	0.177579	-0.01692	0.882061	1.09599	0.0553951	0.760029	190.206	3.2237e-06	193.39	2.11893e-06
OGN	Prostate Cancer	IVW	66	0.0318915	1.00902	1.05634	0.011691	0.00637441	0.0806831	1	-0.0157922	0.940978	1.02968	0.0229812	0.494453	0.00345317	0.0201858	0.0189454	0.983778	1.05574	0.0180104	0.292837	78.7329	0.101723	85.7148	0.0435983
CST1	Prostate Cancer	IVW	89	-0.0232413	0.960766	0.993563	0.00856279	0.00664322	0.0812448	1	-0.0278378	0.945184	1.0007	0.0145603	0.0591801	0.00251243	0.696512	-0.0282702	0.949314	0.995485	0.0121149	0.0196217	103.887	0.104654	104.07	0.116211
HSPA1L	Prostate Cancer	IVW	26	-0.138361	0.78802	0.962241	0.0509544	0.00661969	0.0812448	1	0.139621	0.899095	1.47051	0.125504	0.276949	0.0103605	0.0252326	-0.0291395	0.897278	1.05139	0.0404337	0.471111	96.6931	1.09431e-10	119.643	2.55942e-14
KRT1	Prostate Cancer	IVW	5	-0.226429	0.677248	0.938812	0.0833106	0.00656994	0.0812448	1	-0.0599912	0.470643	1.88452	0.353911	0.876182	0.0336175	0.65946	-0.169415	0.723219	0.985321	0.0788918	0.0317582	6.14403	0.104809	6.63027	0.156765
MASP1	Prostate Cancer	IVW	3	-0.173811	0.741376	0.952777	0.0639982	0.00661012	0.0812448	1	-0.0291238	0.489888	1.92578	0.349211	0.947029	0.023346	0.74607	-0.158599	0.743925	0.978845	0.0700083	0.0234867	0.0993491	0.752612	0.276981	0.870672
PDK1	Prostate Cancer	IVW	13	0.25819	1.07505	1.55895	0.0948085	0.00646371	0.0812448	1	0.368202	0.876192	2.38351	0.255292	0.177086	0.0260376	0.649801	0.163361	1.06007	1.30785	0.0535832	0.00229806	104.482	2.30401e-17	106.551	2.87118e-17
SELL	Prostate Cancer	IVW	61	-0.0289828	0.951181	0.992117	0.010749	0.00701096	0.0851667	1	-0.0553164	0.905023	0.989221	0.0226931	0.0178185	0.0033653	0.192729	-0.0255052	0.944994	1.00558	0.0158527	0.107642	50.1292	0.787953	51.8653	0.763456
CD55	Prostate Cancer	IVW	42	0.0347571	1.00947	1.06193	0.0129231	0.00715494	0.0863363	1	0.0323292	0.984383	1.08372	0.024525	0.194931	0.00366371	0.907417	0.0438996	1.00621	1.08503	0.0192379	0.022493	44.5372	0.286642	44.5525	0.32466
CST4	Prostate Cancer	IVW	45	0.0556673	1.01511	1.10113	0.0207499	0.00730134	0.0870007	1	0.0208995	0.945607	1.10266	0.0391976	0.596653	0.00606383	0.301833	0.0339524	0.992781	1.07805	0.0210191	0.106243	106.827	2.3868e-07	109.54	1.64979e-07
IGF2R	Prostate Cancer	IVW	62	-0.082944	0.86628	0.977906	0.0309197	0.00730614	0.0870007	1	-0.0525807	0.853544	1.05464	0.0539681	0.333823	0.00834504	0.494159	-0.0795266	0.882771	0.96622	0.0230421	0.000557782	524.381	2.37753e-75	528.517	1.12655e-75
AKR7A3	Prostate Cancer	IVW	56	0.040792	1.01089	1.07331	0.0152845	0.00761114	0.0900403	1	0.0333987	0.97156	1.10037	0.0317608	0.297679	0.00392773	0.791067	0.0324778	0.989151	1.07882	0.0221357	0.142319	74.3718	0.034431	74.4694	0.0413122
LGALS3	Prostate Cancer	IVW	24	0.050005	1.01329	1.09068	0.0187756	0.00773797	0.0909462	1	0.0204996	0.964901	1.07975	0.0286886	0.482398	0.00410028	0.192855	0.0649718	1.01995	1.11649	0.0230702	0.00485867	33.8347	0.0510578	36.61	0.0357028
APOE	Prostate Cancer	IVW	37	0.0416031	1.01098	1.07496	0.0156528	0.00786344	0.0918247	1	0.0522155	0.984999	1.12698	0.0343521	0.137493	0.00480726	0.729782	0.0459927	1.00129	1.09494	0.0228104	0.043768	36.5715	0.395666	36.6981	0.436324
NID2	Prostate Cancer	IVW	99	0.0263657	1.00683	1.04699	0.00997707	0.00822655	0.0954491	1	0.0141117	0.981187	1.04835	0.0168898	0.405481	0.00311048	0.370535	0.0173221	0.993871	1.04164	0.0119744	0.148011	188.781	7.22585e-08	190.356	6.86654e-08
MICA	Prostate Cancer	IVW	113	-0.0171503	0.970555	0.995596	0.00649817	0.00830885	0.0954805	1	-0.0102748	0.965191	1.01499	0.0128337	0.425069	0.00497635	0.535313	-0.0191366	0.969228	0.993007	0.00618302	0.00196798	530.866	4.96859e-56	532.715	5.23778e-56
MRC1	Prostate Cancer	IVW	111	0.0223936	1.00577	1.0398	0.00848823	0.00833476	0.0954805	1	0.0429401	1.01822	1.07017	0.0126948	0.000998501	0.00220989	0.0338392	0.0477899	1.02491	1.07355	0.0118269	5.3276e-05	161.013	0.000892385	167.836	0.000320368
HS6ST3	Prostate Cancer	IVW	5	0.139048	1.03577	1.275	0.0530108	0.00871536	0.0985926	1	0.255806	0.85218	1.95731	0.212124	0.314279	0.0194947	0.609492	0.145084	1.02188	1.30804	0.0629815	0.0212456	0.401053	0.940025	0.724198	0.948312
ICAM1	Prostate Cancer	IVW	155	0.011165	1.00283	1.01969	0.00425368	0.00867014	0.0985926	1	0.0227273	1.00931	1.03685	0.00686757	0.00116604	0.00206477	0.0347992	0.0180961	1.00409	1.03263	0.0071516	0.0113947	183.546	0.0465347	188.987	0.0288982
GRHPR	Prostate Cancer	IVW	27	-0.0466395	0.921675	0.988352	0.0178179	0.00885594	0.0995606	1	-0.0423165	0.893737	1.0281	0.0357283	0.247395	0.00423238	0.890099	-0.0237317	0.926467	1.02934	0.0268597	0.376944	23.4447	0.551611	23.4642	0.606573
ADH1A	Prostate Cancer	IVW	5	0.182369	1.04637	1.37631	0.0699175	0.00909803	0.101651	1	0.291555	1.06294	1.68551	0.117608	0.089346	0.0136262	0.339192	0.174222	1.03776	1.36531	0.0699801	0.0127888	5.26086	0.153663	7.5162	0.110997
CROT	Prostate Cancer	IVW	43	0.0327012	1.00809	1.05903	0.0125756	0.0093122	0.103405	1	0.0132546	0.971112	1.05741	0.0217185	0.545038	0.00347293	0.278514	0.0290554	0.987148	1.07363	0.0214236	0.175025	38.3427	0.589374	39.5488	0.579127
NCR3	Prostate Cancer	IVW	45	0.0784394	1.01944	1.14755	0.0301988	0.00939246	0.103661	1	0.109604	0.981178	1.26897	0.0656149	0.102103	0.00617849	0.594602	0.0907019	1.03921	1.15367	0.0266553	0.000667047	156.689	7.71274e-15	157.736	1.01501e-14
SPOCK3	Prostate Cancer	IVW	68	-0.0231075	0.960216	0.994398	0.00892327	0.00960939	0.105412	1	-0.0211576	0.953329	1.0055	0.0135909	0.124313	0.00237784	0.849726	-0.0302248	0.945993	0.995082	0.0129056	0.0191811	61.0654	0.648867	61.1016	0.679841
ADH7	Prostate Cancer	IVW	32	0.0552571	1.01343	1.10205	0.0213868	0.00977465	0.105608	1	0.0842556	1.0135	1.16778	0.0361471	0.0266688	0.00450926	0.327608	0.0635434	1.01757	1.11591	0.0235322	0.00692815	52.244	0.00716805	53.9688	0.00647685
ASIP	Prostate Cancer	IVW	20	0.0609889	1.01485	1.11319	0.0235938	0.00973918	0.105608	1	0.0402791	0.957937	1.13149	0.0424756	0.355542	0.00639764	0.561841	0.0610503	1.02037	1.10731	0.0208604	0.00342676	55.0451	1.2597e-05	56.1134	1.56725e-05
SAT2	Prostate Cancer	IVW	30	0.0611574	1.01482	1.11361	0.0236992	0.00986373	0.105608	1	0.11049	1.02031	1.22247	0.0461149	0.0235012	0.00518967	0.224191	0.0772927	1.02905	1.13423	0.024826	0.00184962	55.3214	0.00155493	58.3738	0.000979799
SPINT3	Prostate Cancer	IVW	43	0.0469995	1.01134	1.08624	0.0182265	0.00991902	0.105608	1	0.0146075	0.934827	1.10143	0.0418373	0.728764	0.0054793	0.394364	0.0504997	1.00195	1.10412	0.0247706	0.04148	59.0759	0.0334624	60.1435	0.0343336
TPSAB1	Prostate Cancer	IVW	163	0.0151062	1.00363	1.02694	0.00585636	0.00989577	0.105608	1	0.00747845	0.991575	1.02369	0.00813213	0.359148	0.00181835	0.179467	0.00485631	0.987632	1.02241	0.00882726	0.582217	211.542	0.00462605	213.931	0.00390462
CHST9	Prostate Cancer	IVW	30	0.0418524	1.01004	1.0765	0.0162569	0.01004	0.105783	1	0.0206645	0.944857	1.10302	0.0394825	0.604826	0.00532207	0.559748	0.0392153	0.993201	1.08899	0.0234884	0.095006	31.4272	0.298441	31.8183	0.327907
MAPRE1	Prostate Cancer	Wald ratio	1	0.299052	1.07394	1.69345	0.116181	0.0100523	0.105783	1
BPI	Prostate Cancer	IVW	97	-0.0172409	0.969971	0.996015	0.00675907	0.0107483	0.110064	1	-0.0208154	0.957425	1.00188	0.0115781	0.0753804	0.00247142	0.703951	-0.019292	0.96116	1.00103	0.0103687	0.0628008	99.0135	0.368665	99.1649	0.392061
CAMP	Prostate Cancer	Wald ratio	1	0.385242	1.09367	1.97575	0.15087	0.0106654	0.110064	1
CRNN	Prostate Cancer	IVW	9	0.143425	1.03367	1.28883	0.056282	0.010824	0.110064	1	0.0922775	0.841937	1.42847	0.134861	0.515828	0.0133828	0.685354	0.167138	1.07489	1.29961	0.0484298	0.00055822	18.3531	0.0104747	18.821	0.0158467
FAM151A	Prostate Cancer	IVW	57	-0.0313878	0.946036	0.992726	0.0122894	0.010648	0.110064	1	-0.00856873	0.951914	1.03267	0.0207712	0.681555	0.0027973	0.178533	-0.0310016	0.935156	1.00505	0.0183882	0.0918048	38.0013	0.960873	39.8582	0.949298
FAM20A	Prostate Cancer	IVW	13	0.0720403	1.01679	1.13591	0.028261	0.0107999	0.110064	1	0.0573402	0.939872	1.19326	0.060894	0.366598	0.00667489	0.787882	0.0625553	0.98116	1.15504	0.0416202	0.132838	12.7937	0.307024	12.8821	0.377668
MIA	Prostate Cancer	IVW	94	-0.0195773	0.965975	0.995473	0.0076737	0.0107349	0.110064	1	-0.0180267	0.961157	1.00357	0.0110155	0.105155	0.00243143	0.844131	-0.0226106	0.959766	0.995854	0.00941617	0.0163393	148.917	0.000160318	148.98	0.00020503
RRM1	Prostate Cancer	Wald ratio	1	0.317976	1.07586	1.75564	0.124927	0.0109186	0.110406	1
ANXA11	Prostate Cancer	IVW	11	0.105288	1.0243	1.2051	0.0414676	0.0111156	0.110688	1	0.00851905	0.786216	1.29377	0.127062	0.948011	0.0119871	0.441183	0.0410768	0.937455	1.15805	0.0539098	0.446088	6.06218	0.73368	6.71133	0.752387
MAPK3	Prostate Cancer	IVW	18	0.0706033	1.01622	1.13328	0.027812	0.01113	0.110688	1	0.0413936	0.908986	1.19508	0.0698058	0.561482	0.0102713	0.652881	0.0763547	1.02041	1.14169	0.0286483	0.00769324	27.0339	0.0411082	27.3888	0.0526065
SIRPB1	Prostate Cancer	IVW	273	0.00892634	1.00204	1.01594	0.00351525	0.0111067	0.110688	1	0.00383755	0.993038	1.01477	0.00552256	0.487722	0.00126677	0.233479	0.00674715	0.995091	1.01859	0.0059531	0.257053	278.278	0.367515	279.742	0.360408
ADH6	Prostate Cancer	IVW	15	-0.0674868	0.887213	0.984813	0.0266241	0.0112512	0.110798	1	-0.0839705	0.832079	1.01601	0.0509477	0.123261	0.00642473	0.710457	-0.0466274	0.885615	1.02862	0.0381867	0.222073	11.7102	0.551538	11.8542	0.618009
YWHAB	Prostate Cancer	IVW	6	0.0848351	1.01941	1.16235	0.0334732	0.0112634	0.110798	1	0.0168915	0.879001	1.17674	0.0744186	0.831568	0.00837708	0.36446	0.0723626	0.998275	1.15772	0.0378007	0.0555792	1.75992	0.779807	2.80489	0.730035
GSS	Prostate Cancer	IVW	10	-0.0955276	0.843887	0.978907	0.0378617	0.0116337	0.113822	1	-0.162698	0.633706	1.13971	0.14973	0.308862	0.0149925	0.65419	-0.116954	0.80434	0.983955	0.051418	0.0229315	9.99584	0.265318	10.2662	0.329365
CA12	Prostate Cancer	Wald ratio	1	-0.384718	0.504348	0.918562	0.152945	0.0118896	0.1157	1
ALDOC	Prostate Cancer	IVW	5	-0.103972	0.830955	0.977492	0.0414322	0.0120915	0.116361	1	-0.0399776	0.844747	1.09282	0.0656841	0.585757	0.0157114	0.298161	-0.0942699	0.823661	1.00547	0.0508805	0.0639154	1.37403	0.711634	2.95051	0.566142
IL6R	Prostate Cancer	IVW	128	0.0242806	1.00532	1.04421	0.00968223	0.0121504	0.116361	1	0.00603451	0.974735	1.03838	0.0161348	0.709028	0.00406867	0.160822	0.0131632	0.994869	1.03197	0.00934069	0.158766	479.147	1.29147e-42	486.714	1.52423e-43
ST13	Prostate Cancer	Wald ratio	1	0.329994	1.07491	1.79993	0.131508	0.0120965	0.116361	1
GNGT2	Prostate Cancer	Wald ratio	1	0.361658	1.08147	1.90598	0.14456	0.0123566	0.117713	1
PDCD6IP	Prostate Cancer	IVW	5	-0.126495	0.797796	0.973275	0.0507177	0.0126276	0.119664	1	0.022711	0.871539	1.20071	0.0817376	0.799174	0.00913522	0.116936	-0.110827	0.800803	1.00049	0.0567929	0.0510079	0.343377	0.951674	5.11218	0.27598
ABO	Prostate Cancer	IVW	259	0.00883005	1.00187	1.01592	0.00355291	0.0129441	0.121463	1	0.00562058	0.995368	1.01601	0.00523616	0.284091	0.00123074	0.404818	0.0061749	0.994069	1.01847	0.00618537	0.318131	248.882	0.630221	249.578	0.635119
FCGR3B	Prostate Cancer	IVW	59	-0.0285706	0.950085	0.99408	0.0115475	0.0133542	0.121463	1	-0.0307724	0.930143	1.01093	0.0212472	0.15301	0.00332236	0.902184	-0.0398171	0.930039	0.99292	0.0166896	0.0170442	28.6684	0.999375	28.6836	0.999565
MAN1C1	Prostate Cancer	IVW	11	0.0566089	1.01198	1.10662	0.0228072	0.0130625	0.121463	1	0.0293634	0.944741	1.12252	0.0439838	0.52114	0.00639889	0.487195	0.0499392	0.991866	1.1141	0.0296459	0.0920808	7.22174	0.614045	7.74656	0.653577
PSG4	Prostate Cancer	IVW	106	0.0207643	1.00433	1.03791	0.0083886	0.0133123	0.121463	1	0.0101481	0.979001	1.04239	0.0160057	0.527453	0.00353179	0.437534	0.0207872	0.99872	1.04379	0.0112589	0.0648515	149.784	0.00221673	150.659	0.00234168
ROBO1	Prostate Cancer	IVW	23	-0.0566613	0.903527	0.988197	0.0228512	0.0131537	0.121463	1	-0.073536	0.848501	1.01736	0.0463003	0.127176	0.0060619	0.677531	-0.0738117	0.875192	0.985791	0.0303573	0.0150393	25.8767	0.211188	26.0959	0.247589
SF3B4	Prostate Cancer	Wald ratio	1	-0.406986	0.482291	0.918729	0.164399	0.0133013	0.121463	1
SFTPB	Prostate Cancer	IVW	45	0.0492351	1.01041	1.09212	0.0198377	0.0130687	0.121463	1	0.0402355	0.975438	1.11109	0.0332166	0.232393	0.00546799	0.735711	0.0597662	1.02443	1.1001	0.0181806	0.00101133	109.259	1.10832e-07	109.552	1.64372e-07
TPST2	Prostate Cancer	IVW	12	-0.0859812	0.857362	0.982095	0.03465	0.0130861	0.121463	1	-0.0335085	0.795422	1.1757	0.0996805	0.743698	0.0096642	0.585189	-0.102413	0.832571	0.978642	0.0412364	0.0130075	13.7502	0.184692	14.1876	0.222785
FKBP4	Prostate Cancer	IVW	3	0.247867	1.05235	1.56003	0.100429	0.0135836	0.122932	1	-0.00671405	0.709924	1.38981	0.171369	0.975071	0.01727	0.338483	0.190926	0.998554	1.46712	0.0981496	0.0517442	0.0140153	0.905762	2.9045	0.234043
CBR3	Prostate Cancer	IVW	45	-0.0387606	0.932779	0.992098	0.015728	0.0137231	0.12346	1	-0.026061	0.92546	1.02567	0.0262261	0.325926	0.00472461	0.546636	-0.0521465	0.914385	0.98532	0.01906	0.00622066	82.5425	0.00027108	83.2512	0.000321706
TMEM132D	Prostate Cancer	IVW	54	0.0295557	1.00605	1.05451	0.0119999	0.0137784	0.12346	1	0.0165754	0.977064	1.05797	0.0202949	0.41781	0.00235472	0.431344	0.0295139	0.990596	1.07088	0.0198787	0.137624	41.7068	0.845729	42.3358	0.852867
TXNDC12	Prostate Cancer	IVW	2	-0.169164	0.737169	0.967161	0.0692723	0.0146055	0.130226	1															0.196987	0.657164
APOL3	Prostate Cancer	IVW	125	0.0153889	1.00302	1.02815	0.006311	0.0147514	0.130882	1	0.0255043	1.00579	1.04628	0.010069	0.0125681	0.00183547	0.200477	0.0309068	1.01117	1.05201	0.0101017	0.00221667	133.33	0.247226	135.125	0.233178
AGRP	Prostate Cancer	IVW	10	-0.0804281	0.864679	0.984659	0.0331473	0.0152501	0.134421	1	-0.133211	0.803645	0.953302	0.043565	0.0156358	0.00631308	0.13107	-0.0781093	0.871551	0.981437	0.0302916	0.00992071	11.5649	0.1717	15.6547	0.0744517
HGF	Prostate Cancer	IVW	2	0.13716	1.02658	1.28158	0.0565967	0.015373	0.134421	1															0.0680777	0.794156
UGDH	Prostate Cancer	IVW	45	0.0507935	1.00979	1.0962	0.0209462	0.0153107	0.134421	1	0.0356331	0.926033	1.15964	0.0573868	0.537925	0.00685072	0.777604	0.047768	0.999057	1.10129	0.0248529	0.0546024	88.8137	4.98751e-05	88.9805	7.0226e-05
RNASET2	Prostate Cancer	IVW	59	0.0241322	1.00456	1.04469	0.00999215	0.0157301	0.136882	1	0.0404729	1.00876	1.0749	0.0162006	0.0153899	0.00269523	0.205239	0.0280598	0.998325	1.0595	0.0151717	0.0643885	42.6734	0.920785	44.3154	0.907209
IGFBP4	Prostate Cancer	Wald ratio	1	-0.321567	0.557916	0.942155	0.133664	0.0161376	0.139756	1
MMP9	Prostate Cancer	Wald ratio	1	-0.216033	0.674646	0.962233	0.0905785	0.0170777	0.146255	1
NPPB	Prostate Cancer	IVW	4	-0.183995	0.715143	0.967812	0.0771824	0.0171304	0.146255	1	-0.0129855	0.926003	1.05223	0.0325983	0.694395	0.0049879	0.161849	-0.0477182	0.907369	1.00177	0.0252488	0.0587686	19.1838	0.57335	5.61289	0.13204
SERPINA1	Prostate Cancer	IVW	105	0.0208032	1.00372	1.03862	0.00871905	0.0170354	0.146255	1	0.0319813	1.00587	1.05984	0.0133332	0.0182552	0.00259473	0.270762	0.0079752	0.984394	1.03219	0.012094	0.509617	198.688	4.73319e-08	201.053	3.68688e-08
EPHB1	Prostate Cancer	IVW	42	0.0370861	1.00652	1.07001	0.0156053	0.0174771	0.146793	1	0.0395233	0.97703	1.1077	0.032021	0.224297	0.00437681	0.93071	0.0272698	0.984259	1.07294	0.0220081	0.215316	49.7327	0.139216	49.7422	0.164353	1.10406e-56	5.35827e-54	0.00205622	0.997934	1.01768e-05
NTRK3	Prostate Cancer	IVW	25	0.0461319	1.00808	1.08787	0.0194325	0.0175989	0.146793	1	0.109028	1.02899	1.20861	0.0410445	0.0141063	0.00456682	0.0953455	0.0527349	0.99927	1.11204	0.027278	0.0532069	21.012	0.580356	24.0372	0.45947
PEBP1	Prostate Cancer	IVW	51	0.0375199	1.00659	1.07087	0.0157935	0.0175179	0.146793	1	0.00453973	0.962658	1.04826	0.021733	0.835403	0.00299465	0.0380839	0.0196239	0.982087	1.059	0.0192343	0.307609	96.8744	5.48917e-05	105.857	6.928e-06
PRCP	Prostate Cancer	IVW	14	-0.0720347	0.876799	0.987487	0.0303281	0.0175404	0.146793	1	-0.018878	0.855876	1.1251	0.0697715	0.79132	0.00751444	0.412952	-0.0802082	0.860501	0.989875	0.0357306	0.0247807	16.1169	0.185939	17.0831	0.195533
SEMA5A	Prostate Cancer	IVW	147	-0.0132541	0.976124	0.99766	0.00556709	0.0172751	0.146793	1	-0.0143257	0.9699	1.00191	0.00828383	0.0858738	0.00147051	0.861194	-0.0291157	0.952929	0.990033	0.00974435	0.00280843	148.975	0.393424	149.007	0.415382
COL6A3	Prostate Cancer	IVW	3	-0.177421	0.722894	0.970108	0.0750369	0.0180572	0.149924	1	-0.671007	0.201731	1.29538	0.474394	0.391777	0.0282962	0.483351	-0.185504	0.694069	0.994194	0.0916737	0.0430195	0.857777	0.354362	1.9681	0.373793
CNDP1	Prostate Cancer	IVW	60	-0.0264923	0.952658	0.995525	0.0112279	0.0182998	0.150557	1	-0.0509457	0.912856	0.989342	0.0205259	0.0159817	0.00288723	0.161528	-0.0286505	0.940602	1.00394	0.016625	0.0848274	59.3476	0.426224	61.4052	0.389857
GCKR	Prostate Cancer	IVW	2	-0.179159	0.720434	0.970041	0.075889	0.0182352	0.150557	1															0.210198	0.646612
ENPP7	Prostate Cancer	IVW	146	0.0137363	1.00227	1.02553	0.00585374	0.0189465	0.155173	1	0.0136337	0.996942	1.03079	0.00851843	0.11168	0.00174453	0.986758	0.00585158	0.989055	1.02297	0.00860067	0.496275	163.263	0.12988	163.263	0.142481
ARG1	Prostate Cancer	IVW	4	0.146532	1.02413	1.30895	0.0625982	0.0192405	0.15547	1	-0.152519	0.564716	1.30525	0.213731	0.549508	0.02392	0.28092	0.144574	1.00205	1.33255	0.0727152	0.0467875	0.365869	0.832823	2.50731	0.473971
B4GALT1	Prostate Cancer	IVW	14	0.0600255	1.00982	1.11659	0.0256376	0.0192161	0.15547	1	0.027045	0.935262	1.12865	0.0479455	0.58309	0.00621905	0.431487	0.0488787	0.9843	1.12028	0.0330116	0.138699	8.4149	0.751925	9.07754	0.767062
CPN2	Prostate Cancer	IVW	52	-0.0274731	0.950784	0.995533	0.0117325	0.0191998	0.15547	1	0.00186478	0.968103	1.03681	0.0174906	0.91552	0.00264996	0.0280999	0.00168398	0.969666	1.03476	0.0165752	0.919077	45.5016	0.654258	50.6167	0.488806
MMP8	Prostate Cancer	IVW	20	0.0490984	1.00791	1.09452	0.0210301	0.0195605	0.156657	1	0.0248297	0.96571	1.08823	0.0304702	0.425789	0.00400711	0.285547	0.0292814	0.971644	1.09126	0.0296162	0.322812	15.2455	0.645047	16.4569	0.626606
MXRA7	Prostate Cancer	IVW	29	-0.070846	0.877814	0.988693	0.0303443	0.0195571	0.156657	1	0.0433746	0.929786	1.17298	0.0592735	0.470612	0.00796453	0.0367953	-0.0956541	0.847311	0.974705	0.0357314	0.0074278	45.7191	0.0136375	53.8912	0.00230588
DYNLL2	Prostate Cancer	Wald ratio	1	-0.30687	0.567779	0.953403	0.132221	0.0202927	0.161805	1
ENDOU	Prostate Cancer	IVW	2	-0.250553	0.629715	0.962119	0.10813	0.0204961	0.16271	1															1.34114	0.246832
USP8	Prostate Cancer	Wald ratio	1	-0.223155	0.662268	0.966353	0.0963923	0.0206089	0.162891	1
GPNMB	Prostate Cancer	IVW	25	-0.0429385	0.923688	0.993525	0.0185929	0.0209213	0.164642	1	-0.0302011	0.919736	1.02354	0.0272793	0.27486	0.00378404	0.540416	-0.0339294	0.916359	1.01968	0.0272541	0.213158	68.1136	0.00364997	68.7628	0.00424544
ENO3	Prostate Cancer	IVW	31	0.0364552	1.00543	1.06982	0.0158349	0.0213238	0.167083	1	0.0541162	0.98823	1.12758	0.0336512	0.118637	0.00466469	0.556595	0.0403388	0.994694	1.0898	0.0232954	0.0833412	20.321	0.882668	20.6748	0.89778
CLMP	Prostate Cancer	IVW	15	0.0755252	1.01083	1.1506	0.0330391	0.0222583	0.173653	1	0.160553	1.00122	1.37697	0.0812914	0.069891	0.00798153	0.272941	0.102158	1.01084	1.21353	0.0466209	0.0284344	10.7738	0.629757	12.0844	0.599528
CCL19	Prostate Cancer	Wald ratio	1	0.340749	1.04923	1.88408	0.149331	0.022499	0.174107	1
SIGLEC6	Prostate Cancer	IVW	141	0.0177476	1.00251	1.03354	0.00777834	0.0225089	0.174107	1	0.0081805	0.985262	1.0317	0.0117491	0.487426	0.00191135	0.27939	0.017317	0.995013	1.04043	0.0113857	0.128275	192.652	0.00177007	194.286	0.00164831
TGFBR3	Prostate Cancer	IVW	10	0.0816631	1.01149	1.16405	0.035837	0.0226826	0.174704	1	-0.0442465	0.801706	1.1417	0.0901872	0.636877	0.00788604	0.166664	0.0747685	0.983558	1.18071	0.0466058	0.108654	3.58382	0.892588	5.89835	0.750048
FUT3	Prostate Cancer	IVW	86	-0.0193367	0.964606	0.997366	0.00852	0.023234	0.177441	1	-0.00862097	0.964595	1.01898	0.0139929	0.539496	0.00301673	0.337014	-0.0177382	0.957605	1.00787	0.0130517	0.174123	105.428	0.0569554	106.598	0.0565921
TNFRSF17	Prostate Cancer	IVW	5	-0.0858302	0.852184	0.988361	0.0378177	0.0232332	0.177441	1	-0.0939676	0.770051	1.07612	0.0853729	0.351432	0.0102642	0.922043	-0.0991321	0.827139	0.991554	0.04625	0.0320812	2.17847	0.536202	2.18977	0.700902
SVEP1	Prostate Cancer	IVW	85	-0.0248796	0.954652	0.996655	0.0109843	0.0235117	0.178807	1	-0.0423252	0.92665	0.991565	0.0172727	0.0163705	0.00256224	0.125056	-0.0170732	0.956408	1.01048	0.0140292	0.223614	115.351	0.0109076	118.688	0.00761202
SEMA3G	Prostate Cancer	IVW	23	0.0432547	1.00573	1.08414	0.0191513	0.0239097	0.180486	1	0.0327706	0.962046	1.10986	0.0364613	0.378961	0.00579824	0.736762	0.0431367	0.992749	1.09807	0.0257216	0.0935301	23.0344	0.342148	23.1616	0.39265
VAT1	Prostate Cancer	IVW	2	0.198671	1.02658	1.44934	0.0879769	0.0239319	0.180486	1															0.245114	0.620536
B4GALT6	Prostate Cancer	IVW	68	0.0183906	1.00242	1.03496	0.00814973	0.0240339	0.180504	1	0.0136067	0.988462	1.03958	0.0128634	0.29401	0.00231454	0.632339	0.0137904	0.990125	1.03822	0.0120992	0.254377	53.4607	0.866571	53.6917	0.88048
AGRN	Prostate Cancer	IVW	24	0.0452849	1.0059	1.08837	0.0201016	0.0242718	0.181537	1	0.00466092	0.926904	1.08896	0.0411051	0.910749	0.00641701	0.270279	0.0475856	0.993687	1.10684	0.0275097	0.0836699	24.1907	0.337312	25.597	0.320257
IL1RN	Prostate Cancer	IVW	18	-0.0488271	0.912596	0.993827	0.0217523	0.0247885	0.183882	1	-0.0854722	0.833617	1.0111	0.0492391	0.101802	0.00548894	0.41899	-0.0259321	0.913779	1.03905	0.032773	0.42879	14.0774	0.592944	14.7656	0.612359
STIM1	Prostate Cancer	IVW	2	-0.159188	0.742235	0.979918	0.0708682	0.0246881	0.183882	1															0.0301677	0.86211
POLM	Prostate Cancer	IVW	9	0.0723351	1.00899	1.14536	0.032338	0.0252967	0.186886	1	0.010678	0.915392	1.11601	0.0505515	0.838725	0.00641289	0.160777	0.0629138	0.984388	1.15207	0.0401271	0.116914	5.82332	0.560524	8.28318	0.406309
BPIFA2	Prostate Cancer	IVW	5	-0.127416	0.787271	0.984473	0.0570241	0.0254555	0.187295	1	-0.0507437	0.655801	1.37769	0.189365	0.806092	0.0181627	0.698299	-0.0924231	0.793639	1.04737	0.0707674	0.191548	3.30983	0.346277	3.51081	0.476237
DPP7	Prostate Cancer	IVW	72	0.0228166	1.00276	1.04381	0.0102338	0.0257785	0.188903	1	0.049658	1.01443	1.0887	0.0180239	0.0074723	0.00283493	0.0747285	0.037446	1.00734	1.06991	0.0153722	0.0148522	56.8764	0.870736	60.1493	0.81723
NSF	Prostate Cancer	IVW	6	-0.150573	0.753377	0.982203	0.0676611	0.0260541	0.190153	1	-0.316127	0.486175	1.09301	0.206663	0.200836	0.0131366	0.444297	-0.0848345	0.772835	1.09201	0.0881916	0.336083	2.55589	0.634657	3.27466	0.657723
ADSS1	Prostate Cancer	IVW	22	0.0641512	1.00742	1.12853	0.0289599	0.0267482	0.194435	1	0.0925643	0.9907	1.21467	0.0519938	0.0902262	0.00631607	0.515472	0.0791422	1.00821	1.16195	0.0362047	0.0288181	36.9379	0.0119041	37.7476	0.0137945
MATN3	Prostate Cancer	IVW	149	0.0166147	1.00189	1.03183	0.00751122	0.0269674	0.195244	1	0.0203705	0.996193	1.04556	0.0123393	0.100902	0.00229603	0.701316	0.0246888	1.00713	1.04318	0.00897304	0.00593343	271.889	1.71622e-09	272.162	2.20888e-09
CEMIP2	Prostate Cancer	IVW	6	-0.0852179	0.851341	0.990552	0.0386351	0.0274039	0.195728	1	-0.0552269	0.808028	1.10816	0.0805774	0.530755	0.00689225	0.693283	-0.0747778	0.851598	1.01115	0.0438076	0.0878297	1.38729	0.846402	1.56718	0.90519
HYAL1	Prostate Cancer	IVW	4	0.139783	1.01581	1.30197	0.0633131	0.0272572	0.195728	1	0.139151	0.941225	1.40337	0.1019	0.305374	0.0180116	0.9944	0.153024	1.00864	1.34641	0.0736827	0.0378199	0.172723	0.917263	0.172785	0.981858
PREP	Prostate Cancer	IVW	15	-0.0632521	0.887424	0.992953	0.0286635	0.027334	0.195728	1	0.024677	0.900277	1.16697	0.0661889	0.715285	0.00836848	0.164328	-0.062626	0.871592	1.01226	0.0381673	0.100833	3.52888	0.995249	5.70104	0.973473
THBS2	Prostate Cancer	IVW	100	-0.0183203	0.965986	0.997968	0.00830921	0.0274668	0.195728	1	0.00206096	0.971786	1.03328	0.0156533	0.895521	0.00230529	0.127668	0.00346769	0.978907	1.02866	0.0126459	0.783919	96.1841	0.532995	98.5446	0.494015
LEPR	Prostate Cancer	IVW	143	0.0102993	1.00113	1.01966	0.00467825	0.0276986	0.196606	1	0.00475755	0.991163	1.01856	0.00695629	0.495148	0.00178955	0.283565	0.00982628	0.994445	1.02554	0.00785535	0.210969	118.066	0.920348	119.225	0.917921
OPCML	Prostate Cancer	IVW	13	-0.104675	0.820412	0.988664	0.0475886	0.0278368	0.196815	1	-0.356581	0.56162	0.87264	0.112423	0.00889026	0.00914804	0.0352364	-0.172891	0.757028	0.934796	0.0538083	0.00131309	14.3459	0.21444	21.8576	0.0391474
MAP1LC3A	Prostate Cancer	Wald ratio	1	-0.304504	0.561883	0.967978	0.138754	0.0281952	0.198133	1
SNPH	Prostate Cancer	IVW	4	-0.143005	0.762797	0.984869	0.0651828	0.0282422	0.198133	1	-0.0432631	0.537073	1.70761	0.295081	0.896881	0.0205756	0.761977	-0.149772	0.743799	0.996447	0.0745983	0.0446743	0.0431302	0.978666	0.163245	0.983293
PARVA	Prostate Cancer	IVW	4	0.136149	1.0144	1.29434	0.0621703	0.0285292	0.198607	1	0.0723684	0.769699	1.50154	0.170472	0.712494	0.0139125	0.726691	0.115108	0.973009	1.29379	0.0726884	0.11329	0.965565	0.617064	1.12702	0.770556
TNFAIP6	Prostate Cancer	IVW	90	0.0160802	1.0017	1.03094	0.00734009	0.0284715	0.198607	1	0.0205015	0.996129	1.0459	0.0124386	0.102873	0.00256847	0.660031	0.0233585	1.00055	1.04725	0.0116369	0.0447193	89.4288	0.43749	89.6268	0.461428
LIMA1	Prostate Cancer	Wald ratio	1	0.258343	1.02725	1.63199	0.118091	0.0286941	0.19899	1
GRAP2	Prostate Cancer	Wald ratio	1	0.444947	1.04646	2.32677	0.203844	0.0290517	0.200701	1
PMVK	Prostate Cancer	IVW	9	0.27774	1.02777	1.69568	0.127728	0.0296701	0.204193	1	-0.202885	0.536152	1.24305	0.214516	0.375756	0.0245574	0.0395704	0.0482426	0.910436	1.20963	0.0724868	0.505707	44.1327	2.01432e-07	84.3015	6.63263e-15
GNPTG	Prostate Cancer	IVW	34	-0.0347762	0.935895	0.996705	0.016059	0.0303476	0.206872	1	-0.0355288	0.912857	1.02032	0.0283916	0.219866	0.00334011	0.974557	-0.0395675	0.918614	1.00577	0.0231233	0.0870521	30.8937	0.522415	30.8948	0.572304
PXDN	Prostate Cancer	IVW	13	0.068883	1.00654	1.14025	0.0318194	0.0304022	0.206872	1	-0.00573104	0.852064	1.16025	0.0787565	0.943296	0.00864823	0.322843	0.0656222	0.986259	1.15613	0.0405398	0.10551	13.4012	0.267916	14.7065	0.257882
TMEFF1	Prostate Cancer	Wald ratio	1	0.297347	1.02878	1.76177	0.137232	0.0302539	0.206872	1
ATRN	Prostate Cancer	IVW	59	0.0182611	1.00163	1.03551	0.00848443	0.0313729	0.210685	1	0.0102146	0.98726	1.03381	0.0117535	0.388451	0.0020214	0.326713	0.0238011	0.999035	1.04977	0.0126362	0.0596246	55.7506	0.522043	56.7292	0.522648
C5	Prostate Cancer	IVW	11	0.081746	1.00738	1.16898	0.0379534	0.0312519	0.210685	1	0.0640959	0.892375	1.27387	0.0907983	0.491822	0.00953803	0.286837	-0.0596098	0.859619	1.03257	0.0467635	0.202413	28.49	0.0122403	30.9851	0.00882535
MPO	Prostate Cancer	IVW	47	0.0358962	1.00318	1.07103	0.0166941	0.0315372	0.210685	1	0.03902	0.986942	1.09547	0.0266145	0.149569	0.00411564	0.88004	0.0542607	1.01603	1.09704	0.0195689	0.00555757	105.373	9.48609e-07	105.427	1.4583e-06
MXRA8	Prostate Cancer	IVW	2	-0.17665	0.713424	0.9845	0.0821578	0.0315446	0.210685	1															0.0623747	0.802781
SIGLEC1	Prostate Cancer	IVW	3	-0.207538	0.672717	0.981527	0.0963737	0.0312819	0.210685	1	-0.479978	0.335383	1.14171	0.312502	0.367413	0.0196645	0.527728	-0.237775	0.627235	0.990924	0.116662	0.0415349	0.00515992	0.942735	0.845085	0.655379
CST3	Prostate Cancer	IVW	22	-0.0601161	0.89139	0.994754	0.0279881	0.0317203	0.21108	1	-0.143729	0.776151	0.966523	0.0559587	0.0183328	0.00721252	0.104221	-0.0597922	0.89148	0.995298	0.0281018	0.0333621	39.9259	0.00510421	45.7099	0.00139625
RAB6B	Prostate Cancer	IVW	11	-0.0561636	0.89796	0.995314	0.0262584	0.0324451	0.215112	1	-0.0288005	0.880245	1.07246	0.0503852	0.58158	0.00651312	0.540409	-0.0401285	0.902415	1.02268	0.0319147	0.20862	6.52829	0.686099	6.9332	0.731736
MICB	Prostate Cancer	IVW	91	0.0196927	1.0016	1.03851	0.00923024	0.0328839	0.217001	1	0.012785	0.972985	1.05438	0.0204959	0.534366	0.0065413	0.706379	0.0147507	1.00016	1.02977	0.0074435	0.0475142	554.238	2.38218e-68	555.127	4.10807e-68
MTHFS	Prostate Cancer	IVW	84	-0.0213931	0.959775	0.998271	0.0100322	0.0329697	0.217001	1	-0.0290809	0.938839	1.00496	0.0173625	0.0977583	0.00253971	0.588138	-0.00189499	0.97117	1.02579	0.0139584	0.892011	100.664	0.0791633	101.027	0.0869238
DNPH1	Prostate Cancer	IVW	2	-0.141854	0.761458	0.988874	0.0666664	0.0333521	0.218722	1															0.0210568	0.884624
KCNAB2	Prostate Cancer	IVW	2	-0.184852	0.700982	0.985673	0.0869496	0.0335063	0.21894	1															0.0457842	0.830569
GUCA2B	Prostate Cancer	IVW	7	-0.0898016	0.841347	0.993172	0.0423214	0.0338464	0.220367	1	-0.0570841	0.796428	1.12014	0.0870071	0.540756	0.00763012	0.684841	-0.099294	0.818553	1.00163	0.0514916	0.053811	4.792	0.441789	4.97722	0.546738
FUT10	Prostate Cancer	IVW	99	-0.0127691	0.97569	0.999073	0.00604147	0.034552	0.223318	1	-0.0281603	0.951324	0.9936	0.0110917	0.0127123	0.00290864	0.102459	-0.00885298	0.97323	1.00947	0.00932762	0.342562	97.7914	0.458378	100.532	0.410278
NT5C2	Prostate Cancer	IVW	11	-0.210227	0.666773	0.984966	0.0995301	0.0346698	0.223318	1	0.0824589	0.818796	1.44028	0.144071	0.581099	0.012959	0.0362418	-0.0293839	0.868518	1.08567	0.0569303	0.605758	44.9951	9.24594e-07	75.2154	4.31996e-12
PNKP	Prostate Cancer	IVW	6	-0.104244	0.817982	0.992456	0.049322	0.0345543	0.223318	1	-0.0689129	0.742958	1.17268	0.11643	0.585762	0.0161833	0.748773	-0.0842182	0.821523	1.02856	0.0573354	0.141868	6.01674	0.197901	6.19385	0.287811
DSC2	Prostate Cancer	IVW	16	-0.0498347	0.908288	0.996531	0.0236527	0.0351228	0.225433	1	-0.0446891	0.860515	1.06274	0.0538447	0.420488	0.00734638	0.916084	-0.0588263	0.885925	1.00348	0.031784	0.0641963	18.0063	0.206495	18.0211	0.261559
SERPINH1	Prostate Cancer	IVW	7	0.138915	1.00955	1.30777	0.0660257	0.0353824	0.226298	1	-0.0758083	0.625098	1.37469	0.20104	0.721587	0.019328	0.310583	0.126425	1.02666	1.25425	0.0510788	0.0133196	13.9274	0.0160773	17.4706	0.00770091
CCS	Prostate Cancer	IVW	5	0.116347	1.00787	1.25214	0.0553617	0.0355904	0.226826	1	-0.0121075	0.708713	1.37725	0.169488	0.947547	0.013687	0.478961	0.10614	0.998641	1.23818	0.0548469	0.0529655	4.43976	0.217726	5.40238	0.248445
ENPP5	Prostate Cancer	IVW	135	-0.0104787	0.979927	0.99932	0.00499909	0.0360707	0.227484	1	-0.0152881	0.971536	0.998302	0.00693312	0.0291664	0.00166879	0.318573	-0.00605042	0.979423	1.00873	0.0075211	0.421131	123.653	0.707467	124.655	0.706678
REG3A	Prostate Cancer	IVW	39	-0.0300826	0.943468	0.998029	0.0143418	0.0359446	0.227484	1	-0.0522437	0.898904	1.00209	0.0277223	0.0673664	0.00370783	0.356012	-0.0480761	0.913885	0.993917	0.0214157	0.0247749	38.3468	0.408244	39.2522	0.41354
TIMP3	Prostate Cancer	IVW	123	0.0125231	1.00082	1.02452	0.00597187	0.0359924	0.227484	1	0.0148888	0.996881	1.03345	0.00918999	0.107811	0.00184211	0.734757	0.00725225	0.988585	1.02633	0.00955749	0.44797	135.219	0.17801	135.348	0.192828
TFF3	Prostate Cancer	IVW	7	-0.101601	0.82145	0.993504	0.0485119	0.0362294	0.227692	1	-0.2606	0.62659	0.94768	0.105542	0.0565883	0.01373	0.15417	-0.137383	0.774379	0.981108	0.0603625	0.0228481	3.71669	0.590882	1.22135	0.269096
MGAT2	Prostate Cancer	IVW	4	-0.0985712	0.826157	0.993847	0.0471425	0.0365354	0.22882	1	-0.318501	0.511244	1.03449	0.1798	0.218503	0.0188976	0.334369	-0.120517	0.805052	0.976105	0.0491489	0.0142032	1.8673	0.393116	3.45838	0.3262
F5	Prostate Cancer	IVW	44	0.0293612	1.00182	1.05856	0.0140542	0.0366949	0.229027	1	0.00204231	0.95592	1.05039	0.0240423	0.932707	0.00300058	0.168713	0.0194555	0.981685	1.05907	0.0193572	0.31486	37.7788	0.65672	39.7402	0.613474
C1R	Prostate Cancer	IVW	5	-0.141294	0.760128	0.991714	0.0678438	0.0372842	0.231905	1	-0.0343046	0.74281	1.25697	0.134189	0.814752	0.012229	0.423587	-0.137329	0.746073	1.01844	0.0793893	0.0836636	2.46764	0.481167	3.32162	0.505513
SIRPG	Prostate Cancer	IVW	7	-0.0806933	0.854803	0.995508	0.0388728	0.0379099	0.234989	1	-0.0394207	0.806291	1.14622	0.0897398	0.678795	0.00888322	0.631582	-0.0817583	0.841686	1.00887	0.0462191	0.0769055	2.702	0.745813	2.96237	0.813554
BIN1	Prostate Cancer	IVW	5	-0.0937212	0.833305	0.994927	0.0452219	0.0382212	0.235541	1	-0.026286	0.774655	1.22479	0.116863	0.836484	0.0106723	0.575823	-0.0781496	0.8372	1.02162	0.0507871	0.123861	1.09451	0.778399	1.48613	0.829095
PSME1	Prostate Cancer	Wald ratio	1	-0.52186	0.362223	0.97217	0.251855	0.0382592	0.235541	1
TMEM106A	Prostate Cancer	Wald ratio	1	0.254507	1.01368	1.64119	0.122917	0.0384	0.235607	1
CCDC50	Prostate Cancer	Wald ratio	1	0.290733	1.01533	1.76165	0.14057	0.0386164	0.235759	1
CDON	Prostate Cancer	IVW	43	-0.0306692	0.941999	0.998414	0.0148378	0.0387378	0.235759	1	-0.0211015	0.936749	1.02341	0.0225706	0.355307	0.0032664	0.574412	-0.022638	0.94466	1.01172	0.0174962	0.195706	63.4325	0.0138493	63.9283	0.0161787
RHOC	Prostate Cancer	IVW	4	-0.109323	0.808132	0.9944	0.0529118	0.0388156	0.235759	1	0.0678677	0.69164	1.65603	0.222733	0.789375	0.0202141	0.498864	-0.0932622	0.806164	1.02937	0.06235	0.134709	0.576248	0.749669	1.24696	0.741764
BTN3A3	Prostate Cancer	IVW	64	0.0130991	1.00061	1.02592	0.00637047	0.0397607	0.240692	1	0.0176164	0.9965	1.0395	0.0107766	0.107184	0.00330801	0.603993	0.0257918	1.00901	1.04354	0.00858347	0.00265741	92.6752	0.00701761	93.0814	0.00818755
TIMP4	Prostate Cancer	IVW	59	-0.0224269	0.957085	0.99901	0.0109368	0.040308	0.243191	1	-0.0515071	0.914589	0.98636	0.0192718	0.0097964	0.00267922	0.0720795	-0.0234359	0.944728	1.01004	0.017052	0.169325	50.7529	0.707079	54.1115	0.62063
EDAR	Prostate Cancer	IVW	38	-0.0306711	0.941754	0.99867	0.0149695	0.0404718	0.243369	1	-0.0455161	0.916202	0.996493	0.0214299	0.0406129	0.00352684	0.339092	-0.0340156	0.92804	1.00667	0.0207473	0.101105	47.0573	0.102704	48.2842	0.101359
THBS3	Prostate Cancer	IVW	6	-0.269205	0.590293	0.98879	0.131597	0.040789	0.244464	1	-0.0963262	0.548232	1.50442	0.257516	0.727344	0.0252645	0.472496	-0.170889	0.712465	0.99725	0.0857834	0.0463604	28.7301	8.86913e-06	33.2394	3.37305e-06
PPCS	Prostate Cancer	Wald ratio	1	-0.148275	0.747909	0.993942	0.0725502	0.0409775	0.244783	1
PILRA	Prostate Cancer	IVW	103	-0.00832002	0.983821	0.999671	0.00407715	0.0412862	0.245816	1	-0.00925811	0.972788	1.00911	0.00935243	0.324429	0.00304084	0.594567	-0.00846364	0.979865	1.00342	0.00605954	0.16249	123.16	0.151103	117.138	0.145101
AGT	Prostate Cancer	IVW	17	-0.0515895	0.903711	0.998068	0.0253347	0.0417188	0.246768	1	-0.00696516	0.912985	1.08016	0.042893	0.87317	0.00585268	0.216825	-0.0503364	0.888137	1.01812	0.0348432	0.148555	13.9062	0.532654	15.5685	0.483462
TAPBPL	Prostate Cancer	IVW	152	-0.00921214	0.982084	0.999654	0.00452345	0.0416974	0.246768	1	-0.00746909	0.980335	1.00493	0.00632214	0.239306	0.00180659	0.692806	-0.00807817	0.979546	1.00452	0.00642233	0.208455	218.442	0.000224179	218.67	0.000264147
ADAM9	Prostate Cancer	Wald ratio	1	-0.38166	0.472059	0.98741	0.188261	0.042632	0.249668	1
DHX58	Prostate Cancer	IVW	15	-0.0538389	0.899459	0.998286	0.0265935	0.0429169	0.249668	1	-0.0400507	0.847265	1.08941	0.0641281	0.543078	0.0075898	0.816893	-0.0317848	0.899615	1.04312	0.0377572	0.399888	10.2065	0.676967	10.2623	0.742764
GGH	Prostate Cancer	IVW	40	-0.0210635	0.959381	0.999341	0.0104102	0.0430368	0.249668	1	-0.0255114	0.942084	1.00868	0.017423	0.151353	0.00335461	0.750368	-0.0199106	0.95097	1.01051	0.0154907	0.198678	40.2356	0.371539	40.3443	0.410653
GREM1	Prostate Cancer	IVW	87	0.0173631	1.00056	1.03476	0.00857384	0.0428547	0.249668	1	0.0101379	0.981587	1.03963	0.0146543	0.490945	0.00243926	0.544065	0.0245774	0.999315	1.0511	0.0128891	0.0565421	94.3478	0.22876	94.7597	0.242919
GSTT2B	Prostate Cancer	IVW	32	-0.0304708	0.941845	0.998973	0.0150222	0.042521	0.249668	1	-0.0147091	0.936697	1.03663	0.0258602	0.57373	0.00409215	0.458196	-0.0294986	0.925615	1.01847	0.0243869	0.22643	30.8888	0.420887	31.4703	0.442702
NLGN2	Prostate Cancer	IVW	7	0.111448	1.0035	1.24533	0.0550793	0.0430306	0.249668	1	0.24404	0.885298	1.84027	0.186669	0.247984	0.017489	0.489097	0.118204	1.01589	1.24688	0.0522654	0.0237213	9.14889	0.103271	10.1679	0.117759
HP	Prostate Cancer	IVW	89	-0.0137861	0.973205	0.999589	0.00682378	0.0433525	0.250504	1	-0.011327	0.962936	1.01523	0.0134903	0.403412	0.00371874	0.83283	-0.0174926	0.966412	0.99918	0.00850611	0.0397372	128.412	0.00259764	118.344	0.0204563
TREML1	Prostate Cancer	IVW	8	-0.106285	0.811031	0.996884	0.0526349	0.0434576	0.250504	1	-0.087246	0.730752	1.14934	0.115528	0.47872	0.0138912	0.859228	-0.0944827	0.791997	1.04523	0.0707732	0.181874	5.22863	0.514842	5.2629	0.627915
C1QTNF9	Prostate Cancer	IVW	17	0.0485204	1.00129	1.10049	0.0241	0.0440831	0.252076	1	0.0742445	0.98299	1.18016	0.0466333	0.132215	0.0051159	0.529086	0.0425758	0.978633	1.11266	0.032742	0.193483	4.77772	0.993847	5.19289	0.994708
CKMT2	Prostate Cancer	Wald ratio	1	-0.28922	0.565196	0.992172	0.143552	0.0439317	0.252076	1
DLL4	Prostate Cancer	Wald ratio	1	0.257289	1.00676	1.66171	0.127834	0.0441482	0.252076	1
PLAAT2	Prostate Cancer	Wald ratio	1	-0.309992	0.541894	0.992727	0.154435	0.044721	0.254544	1	0.0254965	0.909855	1.15657	0.0612074	0.685014
LSAMP	Prostate Cancer	IVW	16	-0.0545162	0.897748	0.998834	0.0272192	0.0451927	0.256422	1	0.0040988	0.901297	1.11864	0.0551118	0.941766	0.00600478	0.241461	-0.0268673	0.906615	1.0453	0.0363112	0.459351	3.73296	0.99687	5.22908	0.990003
CDHR5	Prostate Cancer	IVW	2	-0.201113	0.67144	0.996113	0.100621	0.0456398	0.257682	1															0.563695	0.452775
SVEP1	Prostate Cancer	IVW	85	-0.0209588	0.959333	0.9996	0.0104891	0.0456994	0.257682	1	-0.047446	0.920594	0.987918	0.0180053	0.0100341	0.00262934	0.119354	-0.0186028	0.955149	1.00872	0.013921	0.181447	125.077	0.00195518	128.809	0.00121296
ANGPTL3	Prostate Cancer	IVW	48	-0.0200549	0.960964	0.999709	0.0100836	0.0467166	0.260979	1	-0.00762489	0.967886	1.01754	0.0127635	0.553171	0.00207325	0.121743	0.00046294	0.972682	1.02904	0.014368	0.974296	44.9487	0.516249	47.4344	0.45484
DNAJC30	Prostate Cancer	IVW	8	-0.087407	0.840772	0.998621	0.0438916	0.0464336	0.260979	1	-0.0701791	0.809252	1.07389	0.0721763	0.368438	0.00722334	0.763701	-0.0791622	0.843587	1.01184	0.0463931	0.0879454	9.67531	0.139008	9.83493	0.198122
NTN1	Prostate Cancer	IVW	44	-0.0292995	0.943492	0.999569	0.0147288	0.0466719	0.260979	1	0.000177962	0.951652	1.05118	0.0253742	0.994437	0.00347496	0.163453	-0.0171019	0.945914	1.02163	0.0196439	0.383973	64.1796	0.0153577	67.2539	0.0104481
MFNG	Prostate Cancer	IVW	5	0.102419	1.00124	1.2258	0.0516199	0.0472454	0.262942	1	0.0039308	0.890979	1.13122	0.0609004	0.952597	0.00829467	0.108905	0.0952643	1.0041	1.20495	0.0465187	0.0405727	0.779788	0.854295	5.88831	0.207646
SPON2	Prostate Cancer	IVW	40	0.0276011	1.00032	1.05641	0.0139183	0.0473586	0.262942	1	0.0543639	1.00212	1.1125	0.0266553	0.0483964	0.00361894	0.24641	0.04268	1.00182	1.08713	0.0208458	0.0406173	24.6004	0.954323	25.9864	0.945351
FGG	Prostate Cancer	IVW	5	-0.0896682	0.83652	0.999168	0.0453246	0.0478884	0.264262	1	-0.0131625	0.830785	1.17241	0.0878685	0.890428	0.00824904	0.384864	-0.0633654	0.852482	1.03342	0.0491008	0.196872	3.48148	0.323172	4.67695	0.322079
REG1B	Prostate Cancer	IVW	57	-0.0235178	0.954266	0.999777	0.0118851	0.047842	0.264262	1	-0.0496408	0.913817	0.990885	0.020655	0.0196456	0.00278619	0.129938	-0.0103929	0.954802	1.02579	0.0182951	0.569987	56.9313	0.403047	59.3778	0.353566
MTRF1L	Prostate Cancer	IVW	13	0.0748849	0.999997	1.16157	0.0382082	0.0500058	0.273446	1	0.188701	1.05955	1.37652	0.0667652	0.0164796	0.00646931	0.0725543	0.0943273	1.01636	1.18819	0.0398481	0.0179246	14.235	0.220263	19.3377	0.0806973
RNASE3	Prostate Cancer	IVW	46	-0.0248913	0.95145	0.999985	0.0126921	0.049861	0.273446	1	-0.0174779	0.947117	1.01957	0.0188037	0.357705	0.00315395	0.593317	-0.0198374	0.947988	1.01383	0.0171306	0.246862	48.8739	0.283648	49.1954	0.308887
TNFSF14	Prostate Cancer	IVW	8	-0.0669695	0.874694	0.999942	0.0341385	0.0497972	0.273446	1	-0.0841225	0.777256	1.08735	0.0856444	0.363919	0.00954012	0.834372	-0.0754658	0.849082	1.01275	0.0449661	0.0932917	1.76526	0.939973	1.81295	0.969464
ACP5	Prostate Cancer	IVW	18	0.0389416	0.999896	1.08111	0.0199213	0.0506095	0.274261	1	0.0739422	0.989352	1.17186	0.0431874	0.106183	0.00657209	0.373971	0.048481	1.00023	1.10156	0.0246165	0.0489015	19.6594	0.235955	20.6872	0.240594
ATF6B	Prostate Cancer	IVW	43	0.069104	0.999891	1.14834	0.0353126	0.0503568	0.274261	1	0.18782	0.986626	1.47566	0.102696	0.0746964	0.0100755	0.225684	0.120342	1.05677	1.20378	0.033229	0.000292799	191.072	3.07169e-21	198.123	4.04293e-22
CD59	Prostate Cancer	IVW	8	-0.0678765	0.8729	1.00018	0.0347231	0.0506073	0.274261	1	0.000624302	0.857732	1.16732	0.078616	0.993921	0.00984167	0.368528	-0.0731054	0.861895	1.00241	0.0385287	0.0577715	8.43119	0.208184	9.75916	0.202638
PRSS22	Prostate Cancer	IVW	20	0.0599825	0.999789	1.1277	0.030711	0.0508045	0.274496	1	0.0633626	0.936783	1.21171	0.0656461	0.347227	0.00825175	0.953826	0.030823	0.969456	1.0971	0.0315528	0.328633	41.3031	0.00138241	41.311	0.00219348
AKR1A1	Prostate Cancer	IVW	45	-0.0246018	0.95166	1.00034	0.0127274	0.0532391	0.276909	1	-0.0495059	0.912007	0.99312	0.0217357	0.0277797	0.00392048	0.167059	-0.0313014	0.938652	1.00071	0.016331	0.0552774	61.5564	0.0329678	64.3843	0.0241261
CCL27	Prostate Cancer	Wald ratio	1	-0.287513	0.55995	1.00489	0.149181	0.0539452	0.276909	1
CNTN4	Prostate Cancer	IVW	72	0.024089	0.99969	1.04968	0.0124484	0.0529762	0.276909	1	-0.00591087	0.947111	1.04343	0.0247084	0.81163	0.0028952	0.165221	0.0314134	0.995926	1.0692	0.01811	0.0828132	83.3919	0.130868	85.7348	0.112161
CTRB2	Prostate Cancer	IVW	109	-0.0102648	0.979544	1.00014	0.00530792	0.0531296	0.276909	1	-0.00848777	0.976001	1.00734	0.00806347	0.294886	0.00206339	0.770277	-0.000380023	0.982492	1.01705	0.00881763	0.965623	106.46	0.496561	106.545	0.521526
EPHA10	Prostate Cancer	IVW	2	-0.270813	0.580701	1.0019	0.139136	0.051608	0.276909	1															2.56688	0.109123
FLRT3	Prostate Cancer	IVW	106	-0.00906179	0.981898	1.00014	0.00469681	0.0536875	0.276909	1	0.00481462	0.988327	1.0216	0.00844718	0.569929	0.00232622	0.0512104	-0.00705501	0.977519	1.00866	0.00800136	0.377925	102.055	0.535619	105.946	0.455792
GNRH2	Prostate Cancer	IVW	7	-0.0701861	0.868506	1.00061	0.0361195	0.0519964	0.276909	1	-0.086953	0.814363	1.03194	0.0604063	0.209556	0.00572403	0.743218	-0.0603406	0.866878	1.02242	0.0421002	0.151783	3.54142	0.617129	3.66134	0.722394
IGFLR1	Prostate Cancer	IVW	53	0.032488	0.999772	1.06738	0.0166917	0.0516113	0.276909	1	0.0695825	1.01202	1.13566	0.0294049	0.0218003	0.00458287	0.133844	0.0714729	1.03358	1.11618	0.0196128	0.000268227	109.22	4.02693e-06	114.19	1.47571e-06
IL7R	Prostate Cancer	Wald ratio	1	-0.254056	0.599659	1.00329	0.131295	0.0529895	0.276909	1
KREMEN1	Prostate Cancer	IVW	21	0.0724721	0.998924	1.15722	0.0375249	0.0534451	0.276909	1	0.0469549	0.900659	1.21962	0.0773385	0.550949	0.00846395	0.708191	0.0676004	1.00783	1.13587	0.0305089	0.026708	64.9227	6.28486e-07	65.416	1.00172e-06
LRRC4C	Prostate Cancer	IVW	20	-0.046501	0.91071	1.00053	0.0239946	0.0526259	0.276909	1	0.0294985	0.90452	1.17275	0.0662495	0.661438	0.00732841	0.234264	-0.038066	0.900477	1.02911	0.0340636	0.263781	13.7263	0.746752	15.241	0.707163
MIF	Prostate Cancer	IVW	3	-0.18026	0.695308	1.00288	0.0934389	0.0537089	0.276909	1	-0.727079	0.104932	2.22618	0.779269	0.522048	0.0476055	0.608301	-0.179836	0.682912	1.02195	0.102833	0.0803238	0.10929	0.740954	0.608866	0.737542
MYOC	Prostate Cancer	IVW	48	-0.0229456	0.954754	1.00041	0.0119163	0.0541579	0.276909	1	-0.0189279	0.93909	1.0253	0.0224059	0.402611	0.0037715	0.832566	-0.0172025	0.947883	1.0193	0.0185315	0.353259	53.5913	0.206009	53.644	0.234696
OMD	Prostate Cancer	IVW	2	0.196013	0.997891	1.4831	0.101083	0.052487	0.276909	1															0.600324	0.438455
PSAT1	Prostate Cancer	IVW	6	-0.076875	0.856794	1.00081	0.0396341	0.052426	0.276909	1	-0.00707696	0.805971	1.2233	0.106444	0.950182	0.010618	0.518842	-0.07217	0.84823	1.02047	0.0471602	0.125939	3.6684	0.452738	4.16758	0.525549
ROR1	Prostate Cancer	IVW	33	-0.0339375	0.934004	1.0004	0.0175187	0.0527198	0.276909	1	-0.0253988	0.910668	1.04371	0.0347847	0.470768	0.00490979	0.777102	-0.0423809	0.91568	1.00333	0.0233204	0.0691655	41.4809	0.0989175	41.59	0.119412
SDF2	Prostate Cancer	IVW	23	-0.0370419	0.928084	1.00055	0.0191793	0.0534402	0.276909	1	-0.0560663	0.864583	1.03394	0.0456332	0.232802	0.00575348	0.650634	-0.0284146	0.92153	1.0252	0.0271965	0.296121	19.473	0.554825	19.6841	0.602793
SIGLEC9	Prostate Cancer	IVW	195	-0.00917533	0.981658	1.00016	0.00476372	0.0540939	0.276909	1	-0.0111299	0.975493	1.00256	0.00698084	0.112493	0.00175391	0.701562	-0.0113289	0.977918	0.999671	0.00561229	0.04353	364.03	1.27401e-12	364.308	1.64847e-12
VARS1	Prostate Cancer	IVW	24	-0.11052	0.800911	1.00097	0.0568805	0.0520141	0.276909	1	0.140633	0.886394	1.4946	0.133279	0.302793	0.01097	0.0518652	-0.022599	0.901678	1.06003	0.0412751	0.584021	98.0186	1.42886e-11	116.847	1.53009e-14
ANXA4	Prostate Cancer	IVW	27	0.0345218	0.999289	1.07225	0.0179763	0.0548066	0.279436	1	0.0148238	0.950485	1.08375	0.0334729	0.661676	0.00395429	0.491857	0.0259856	0.976199	1.07903	0.0255482	0.309096	23.4747	0.549865	23.9614	0.578174
NCF1	Prostate Cancer	IVW	41	-0.0282703	0.944451	1.00061	0.0147355	0.0550459	0.279868	1	-0.0378037	0.916194	1.01199	0.0253692	0.144231	0.00370326	0.646901	-0.0360916	0.924841	1.00597	0.0214496	0.0924481	36.3479	0.591485	36.561	0.625866
CNP	Prostate Cancer	IVW	2	0.145623	0.996737	1.34247	0.0759651	0.0552408	0.280072	1															0.00223999	0.962251
DECR1	Prostate Cancer	IVW	8	0.098938	0.997685	1.22164	0.0516609	0.0554745	0.280472	1	0.104871	0.892241	1.38232	0.111679	0.383955	0.00939313	0.445125	0.127717	0.99823	1.29331	0.0660656	0.0532129	3.92684	0.686576	4.59441	0.709321
MSR1	Prostate Cancer	IVW	31	0.025482	0.999363	1.05296	0.013326	0.0558508	0.281587	1	0.00955444	0.972938	1.04764	0.0188721	0.616492	0.00347459	0.242962	0.00369154	0.96792	1.0408	0.018519	0.841998	20.1167	0.889261	21.5374	0.870336
PGLYRP3	Prostate Cancer	IVW	3	0.167874	0.99558	1.4052	0.0879098	0.0561832	0.281694	1	0.0398961	0.679641	1.59358	0.217391	0.884452	0.015539	0.624591	0.175446	0.962186	1.47615	0.10918	0.108068	1.40649	0.23564	2.03619	0.361283
TMEM106B	Prostate Cancer	IVW	2	-0.111415	0.797908	1.00294	0.0583403	0.0561666	0.281694	1															0.065237	0.798402
CPNE1	Prostate Cancer	IVW	59	0.0178781	0.999501	1.03692	0.00937598	0.0565473	0.282224	1	0.00633155	0.976853	1.03674	0.0151791	0.678156	0.00426235	0.337333	0.0213058	1.00074	1.04276	0.0104924	0.0422959	109.947	3.22364e-05	111.753	2.88238e-05
ISOC1	Prostate Cancer	IVW	17	-0.0506167	0.902407	1.00146	0.0265679	0.0567566	0.282224	1	-0.0708766	0.808886	1.07288	0.0720512	0.340866	0.00718736	0.765345	-0.0330192	0.900795	1.03919	0.0364585	0.365113	16.8191	0.329792	16.9227	0.390615
QPCTL	Prostate Cancer	IVW	47	-0.0309044	0.939229	1.00089	0.0162201	0.0567386	0.282224	1	0.0268092	0.975499	1.08158	0.0263341	0.314102	0.00314554	0.0100945	-0.0138687	0.940068	1.03465	0.0244561	0.570656	53.6136	0.177475	62.2087	0.0556898
NCAN	Prostate Cancer	IVW	9	-0.0629911	0.879948	1.00191	0.0331127	0.0571288	0.283296	1	-0.0247825	0.880703	1.08055	0.0521694	0.649223	0.0077818	0.372983	-0.0606328	0.877418	1.00955	0.0357853	0.0901987	8.27262	0.309169	9.34284	0.314205
HHIP	Prostate Cancer	IVW	9	0.0641104	0.997931	1.13916	0.0337661	0.0576093	0.283904	1	-0.0130558	0.867009	1.12366	0.066148	0.849144	0.00585423	0.218008	0.0561926	0.969198	1.1545	0.044632	0.208023	6.27918	0.507555	8.11082	0.42272
LTF	Prostate Cancer	IVW	19	0.0452223	0.998519	1.09628	0.0238288	0.057722	0.283904	1	0.0117512	0.929415	1.10153	0.0433422	0.789559	0.00478329	0.368158	0.0516893	0.988735	1.12155	0.0321522	0.107913	10.0167	0.902911	10.8714	0.899735
SMAP1	Prostate Cancer	IVW	42	0.0288858	0.99907	1.06046	0.0152126	0.0575891	0.283904	1	0.032338	0.973527	1.09582	0.0301874	0.290481	0.00462122	0.894894	0.0612658	1.02352	1.10438	0.0193956	0.00158444	66.4408	0.00538917	66.4702	0.00715253
ADAMTS5	Prostate Cancer	IVW	27	-0.0258571	0.948644	1.00101	0.0137062	0.0592232	0.289615	1	-0.0237507	0.938299	1.01632	0.0203756	0.254758	0.00383725	0.888242	-0.0247908	0.94223	1.00997	0.0177121	0.161617	25.9542	0.410046	25.9751	0.464473
MFGE8	Prostate Cancer	IVW	28	0.033932	0.998638	1.07168	0.0180076	0.059523	0.289615	1	-0.0109914	0.916437	1.06746	0.0389135	0.779829	0.0058382	0.204242	0.00433072	0.954991	1.05624	0.0257061	0.866213	21.5187	0.714718	23.2147	0.673428
NCAM2	Prostate Cancer	IVW	103	-0.0151171	0.969639	1.0006	0.0080177	0.059366	0.289615	1	-0.0224023	0.948147	1.00848	0.0157367	0.157654	0.00244224	0.59176	-0.0177078	0.959877	1.00555	0.0118585	0.135368	83.3905	0.898262	83.6799	0.906787
PDCD1LG2	Prostate Cancer	IVW	47	-0.0321545	0.936548	1.00125	0.0170407	0.0591702	0.289615	1	-0.0170161	0.92255	1.04768	0.0324479	0.602566	0.00441793	0.585142	-0.0556864	0.911149	0.981843	0.0190624	0.00348612	86.9896	0.000173589	87.574	0.00021307
BCHE	Prostate Cancer	IVW	49	0.0166016	0.999272	1.03451	0.00884188	0.0604346	0.290416	1	0.0352669	1.00454	1.06823	0.0156813	0.0292395	0.00339863	0.156144	0.0238665	0.996807	1.05225	0.0138086	0.0839206	42.061	0.67688	44.1382	0.631815
MUSK	Prostate Cancer	IVW	2	0.157651	0.993327	1.37988	0.0838502	0.0600868	0.290416	1															0.000132938	0.990801
SERPINB13	Prostate Cancer	IVW	15	-0.0536881	0.896063	1.00237	0.0286	0.06049	0.290416	1	0.00590493	0.913311	1.10792	0.0492773	0.906449	0.00600363	0.168635	-0.0173044	0.914077	1.05679	0.0370082	0.640083	13.4539	0.413391	15.6532	0.335007
SPINK4	Prostate Cancer	IVW	12	-0.0562441	0.891465	1.0024	0.0299211	0.0601427	0.290416	1	-0.0824731	0.833129	1.01778	0.0510681	0.137392	0.00599147	0.534489	-0.0674629	0.876505	0.996892	0.0328317	0.0398976	12.7819	0.236125	13.3109	0.273494
THYN1	Prostate Cancer	Wald ratio	1	-0.291833	0.550823	1.01276	0.155362	0.060326	0.290416	1
XPNPEP1	Prostate Cancer	Wald ratio	1	-0.216433	0.642338	1.00982	0.115412	0.0607507	0.290896	1
CNN1	Prostate Cancer	Wald ratio	1	-0.215262	0.643651	1.01013	0.114968	0.0611552	0.29206	1
C1orf56	Prostate Cancer	IVW	8	0.102568	0.994893	1.23399	0.0549425	0.0619271	0.294968	1	0.116684	0.901418	1.40095	0.112485	0.339567	0.0167182	0.887475	0.117487	1.02012	1.23993	0.0497809	0.0182714	25.2509	0.000306789	25.3426	0.000659637
BRSK2	Prostate Cancer	IVW	7	-0.0788308	0.850577	1.00419	0.0423516	0.0626961	0.297848	1	0.0202123	0.868572	1.19881	0.0822026	0.815547	0.00875095	0.227794	-0.0658041	0.863936	1.01476	0.0410471	0.108905	6.54238	0.256958	9.01317	0.172839
IRF2	Prostate Cancer	Wald ratio	1	-0.673799	0.250435	1.03765	0.362631	0.0631572	0.299253	1
CHST4	Prostate Cancer	IVW	2	-0.240619	0.609746	1.01357	0.12964	0.0634446	0.299829	1															2.9089	0.088092
PTGFRN	Prostate Cancer	IVW	98	0.0117851	0.999323	1.02454	0.00635827	0.0638088	0.300766	1	0.0170286	0.99762	1.03711	0.0099036	0.0887583	0.00219729	0.490687	0.015303	0.996738	1.03445	0.00947444	0.106269	103.147	0.290693	103.661	0.303157
ATXN3	Prostate Cancer	IVW	33	-0.0282494	0.943491	1.00167	0.0152649	0.0642262	0.301458	1	-0.0363934	0.909217	1.02264	0.0299891	0.234083	0.00342417	0.754499	-0.0521919	0.906642	0.993644	0.0233754	0.025564	30.0503	0.514698	30.1499	0.560414
NMT1	Prostate Cancer	Wald ratio	1	-0.278393	0.563656	1.01666	0.150469	0.0642888	0.301458	1
SRL	Prostate Cancer	IVW	4	0.16545	0.990109	1.40613	0.0894845	0.0644695	0.301524	1	-0.203237	0.463275	1.43758	0.288876	0.554591	0.026462	0.315441	0.117606	1.01072	1.25176	0.0545621	0.0311262	5.4178	0.0666099	10.1958	0.0169734
TNFRSF11B	Prostate Cancer	IVW	27	0.0423826	0.997333	1.09137	0.0229863	0.0652088	0.304196	1	0.0429692	0.944197	1.15414	0.051219	0.409459	0.00499491	0.989877	0.0216687	0.960218	1.08755	0.031767	0.495166	16.4069	0.902171	16.4071	0.925905
UCMA	Prostate Cancer	IVW	61	0.0243385	0.998442	1.05152	0.013213	0.0654732	0.304644	1	0.0354054	0.987252	1.08724	0.0246098	0.155529	0.00309075	0.595114	0.0233235	0.984833	1.06389	0.0196971	0.23637	73.6545	0.0948554	74.0109	0.105476
CBR1	Prostate Cancer	IVW	20	0.0414253	0.99723	1.0894	0.0225505	0.0662097	0.306495	1	-0.00718591	0.941764	1.04669	0.0269465	0.792752	0.00421118	0.0166485	0.0183764	0.96699	1.07285	0.0265017	0.488057	22.2336	0.221779	30.8403	0.0420319
NMB	Prostate Cancer	IVW	15	0.0563242	0.996252	1.12345	0.0306527	0.0661368	0.306495	1	0.100124	0.929214	1.31477	0.0885411	0.278563	0.00752016	0.606875	0.0797301	1.0004	1.17241	0.0404736	0.0488467	9.6768	0.720126	9.95484	0.765478
MAP3K3	Prostate Cancer	Wald ratio	1	0.266962	0.980865	1.73889	0.146063	0.0675911	0.308939	1
MCL1	Prostate Cancer	IVW	2	0.0716972	0.994892	1.16011	0.0391931	0.06735	0.308939	1															0.303813	0.581502
RARRES2	Prostate Cancer	IVW	16	0.0440352	0.996894	1.09547	0.0240542	0.0671503	0.308939	1	0.0599341	0.974419	1.15694	0.0437999	0.192759	0.00584801	0.670652	0.0547486	0.994929	1.1214	0.030527	0.0729016	11.4898	0.647201	11.6785	0.703184
REG1A	Prostate Cancer	IVW	50	-0.0241044	0.951279	1.00174	0.0131852	0.0675288	0.308939	1	-0.0415485	0.9146	1.00619	0.024347	0.0943754	0.00327513	0.397752	-0.0107409	0.95199	1.02811	0.0196223	0.584116	53.6293	0.267309	54.4428	0.275094
SCGN	Prostate Cancer	IVW	4	-0.144181	0.74173	1.01046	0.0788715	0.0675414	0.308939	1	-0.91298	0.141876	1.13524	0.530521	0.227408	0.0406927	0.281506	-0.160092	0.728459	0.996644	0.0799648	0.0452808	2.23327	0.32738	4.61642	0.202138
CFHR3	Prostate Cancer	IVW	6	0.0897442	0.992991	1.20505	0.0493764	0.0691325	0.3129	1	0.127209	0.858167	1.50287	0.142941	0.423787	0.010911	0.793868	0.0859295	0.972497	1.22109	0.0580704	0.138941	0.838764	0.933177	0.916767	0.968996
EBI3	Prostate Cancer	IVW	208	-0.00780669	0.983907	1.00061	0.00429427	0.0690746	0.3129	1	-0.0130487	0.975653	0.998552	0.00591818	0.0285709	0.0013536	0.19946	-0.00905203	0.978591	1.00354	0.00642322	0.158756	203.153	0.543007	204.81	0.529974
GALP	Prostate Cancer	Wald ratio	1	0.232361	0.982351	1.62017	0.127637	0.0686848	0.3129	1
VASN	Prostate Cancer	IVW	3	-0.396245	0.438862	1.03157	0.218023	0.0691492	0.3129	1	0.480792	0.911432	2.87003	0.292618	0.348059	0.0273885	0.194353	-0.475036	0.475504	0.813269	0.13691	0.000521037	0.227209	0.633601	10.2963	0.00581023
MDGA2	Prostate Cancer	IVW	93	-0.0134352	0.972427	1.00109	0.00741087	0.0698468	0.314484	1	-0.0197838	0.956373	1.00505	0.012665	0.121741	0.00250969	0.537312	-0.013419	0.964743	1.0091	0.0114668	0.241899	119.061	0.0258103	119.563	0.0282908
OLFM1	Prostate Cancer	IVW	10	-0.0656497	0.872331	1.0053	0.0361923	0.069691	0.314484	1	-0.00637497	0.851926	1.15894	0.0785108	0.937279	0.0067831	0.419626	-0.0520112	0.866975	1.03948	0.0462925	0.261211	6.88268	0.549342	7.6065	0.574235
KLC1	Prostate Cancer	IVW	3	0.167201	0.986057	1.41686	0.0924702	0.0705816	0.316219	1	0.57705	1.16031	2.73304	0.218552	0.230486	0.0166234	0.299652	0.18914	1.03714	1.4075	0.0778949	0.0151761	0.139439	0.70884	4.00171	0.135219
TIRAP	Prostate Cancer	IVW	15	-0.0407567	0.91859	1.00341	0.0225297	0.0704478	0.316219	1	-0.00821351	0.913184	1.07723	0.0421452	0.848495	0.00490016	0.377522	-0.0338225	0.908407	1.02883	0.0317551	0.286828	9.46481	0.737003	10.2996	0.739967
FLT4	Prostate Cancer	IVW	11	-0.0648335	0.873465	1.00564	0.035946	0.0712887	0.317211	1	0.0427557	0.873061	1.24765	0.0910741	0.649906	0.00755964	0.231223	-0.033985	0.876376	1.06608	0.0499874	0.496586	8.50205	0.484447	10.1506	0.427381
HP	Prostate Cancer	IVW	90	-0.010541	0.978243	1.00092	0.00584513	0.0713286	0.317211	1	-0.0116603	0.96667	1.01063	0.011346	0.306907	0.00351524	0.908442	-0.0122204	0.970271	1.00576	0.00916289	0.182308	118.326	0.0172126	128.478	0.00319014
TRDMT1	Prostate Cancer	IVW	44	0.0276822	0.997634	1.05943	0.0153323	0.0710004	0.317211	1	-0.00173153	0.932284	1.06893	0.0348909	0.960655	0.00415831	0.35336	0.0347544	0.988205	1.08478	0.0237857	0.143975	34.6232	0.783351	35.504	0.784553
MMP10	Prostate Cancer	IVW	88	-0.0230593	0.952955	1.00207	0.0128208	0.0720853	0.319766	1	-0.0503778	0.907042	0.996816	0.0240759	0.0393447	0.00371881	0.184363	-0.024599	0.94438	1.00806	0.0166469	0.139489	191.117	5.86938e-10	195.097	2.86263e-10
VEGFA	Prostate Cancer	IVW	25	-0.0319149	0.935462	1.00289	0.0177552	0.0722564	0.319766	1	-0.0147836	0.959922	1.0114	0.0133261	0.270596	0.00222897	0.553033	-0.0244652	0.933767	1.01979	0.0224814	0.276489	72.1777	0.721269	72.5326	0.737966
GZMK	Prostate Cancer	IVW	9	-0.067694	0.867725	1.00651	0.0378505	0.0737019	0.323424	1	0.00918607	0.827665	1.23062	0.10119	0.93021	0.00947096	0.438143	-0.0724597	0.850294	1.0174	0.0457722	0.11341	8.28473	0.308158	9.08454	0.335215
NME4	Prostate Cancer	IVW	17	0.0757362	0.992846	1.17193	0.0423041	0.0734088	0.323424	1	0.0435794	0.876094	1.24538	0.0897254	0.6342	0.00711958	0.687873	0.0627157	0.960124	1.18072	0.0527594	0.234554	21.1007	0.133644	21.3367	0.165928
TCN2	Prostate Cancer	IVW	115	0.00783438	0.999246	1.01656	0.00438198	0.0737979	0.323424	1	0.0147306	0.988225	1.04217	0.0135592	0.280695	0.00315907	0.622417	0.0187479	0.999103	1.03914	0.0100233	0.0614233	118.398	0.00170969	118.774	0.00201876
VTN	Prostate Cancer	IVW	131	-0.00621878	0.987053	1.00059	0.0034761	0.0736128	0.323424	1	-0.00703544	0.980784	1.00535	0.00630975	0.266919	0.00231957	0.876796	-0.0075838	0.982049	1.00295	0.00537264	0.15808	133.981	0.364076	134.006	0.386984
TAC1	Prostate Cancer	IVW	23	-0.0522829	0.896014	1.00525	0.0293452	0.0748056	0.327049	1	-0.00762676	0.866295	1.13687	0.0693383	0.913459	0.00796443	0.483929	-0.0804157	0.863961	0.985502	0.0335775	0.0166236	43.3362	0.00284706	44.3842	0.00317432
VWA1	Prostate Cancer	IVW	40	-0.0352687	0.928562	1.00359	0.0198213	0.0751849	0.327915	1	-0.0141889	0.936146	1.03832	0.0264261	0.594449	0.00373022	0.238462	-0.0271414	0.933592	1.01454	0.0212113	0.200695	65.3552	0.00378362	67.8222	0.00286426
ARSA	Prostate Cancer	Wald ratio	1	-0.677961	0.240233	1.07275	0.381726	0.0757264	0.329483	1
HAVCR2	Prostate Cancer	IVW	66	-0.0172368	0.96435	1.00183	0.00972651	0.0763698	0.331155	1	-0.0366872	0.93142	0.997673	0.0175293	0.0403272	0.00278062	0.188145	-0.0129001	0.960624	1.01448	0.0139145	0.353876	79.2764	0.0944973	81.4685	0.0814883
HBQ1	Prostate Cancer	IVW	4	-0.109428	0.794017	1.01186	0.061848	0.0768425	0.331155	1	-0.459232	0.132534	3.01153	0.796776	0.62259	0.0861202	0.702703	-0.0911361	0.797965	1.04438	0.0686504	0.18433	1.77398	0.411894	1.96789	0.579098
PARP1	Prostate Cancer	Wald ratio	1	0.245723	0.973869	1.67854	0.138878	0.0768377	0.331155	1
XXYLT1	Prostate Cancer	IVW	36	-0.0307409	0.937299	1.00328	0.0173532	0.0764799	0.331155	1	-0.0592552	0.866619	1.02495	0.0428064	0.175298	0.00519094	0.471185	-0.0370957	0.916017	1.01362	0.0258288	0.150942	22.3257	0.93788	22.8566	0.943184
HEXB	Prostate Cancer	IVW	18	0.0347651	0.996166	1.07613	0.0196971	0.0775668	0.333482	1	0.0694933	1.00319	1.14545	0.0338299	0.0566703	0.00548248	0.228456	0.0452222	1.00023	1.09441	0.0229562	0.0488459	19.2467	0.256079	21.1332	0.22039
NPW	Prostate Cancer	IVW	40	-0.0218103	0.954959	1.00247	0.0123861	0.0782615	0.335672	1	-0.0407854	0.925069	0.996322	0.0189291	0.0375925	0.00361797	0.195873	-0.0277576	0.942678	1.00352	0.0159558	0.0819189	46.1603	0.170639	48.2658	0.146825
LGALS2	Prostate Cancer	IVW	20	0.0428403	0.995045	1.09488	0.0243916	0.0790277	0.336565	1	0.174925	1.07592	1.31874	0.0519136	0.00341406	0.0060031	0.0123038	0.0469546	0.987543	1.11232	0.0303518	0.12186	17.9112	0.461514	25.6504	0.14023
PZP	Prostate Cancer	IVW	28	0.0418774	0.99516	1.09265	0.0238412	0.0790006	0.336565	1	0.0209384	0.92301	1.12975	0.0515581	0.687982	0.00628182	0.649396	-0.0244448	0.915972	1.03965	0.0323085	0.449287	35.2313	0.106737	35.518	0.126224
THBS4	Prostate Cancer	IVW	22	-0.0307099	0.937101	1.00355	0.0174765	0.0788816	0.336565	1	-0.0221992	0.918674	1.04125	0.0319513	0.495184	0.00380341	0.753648	-0.0317649	0.924181	1.01544	0.0240218	0.186056	15.2085	0.764354	15.3098	0.807094
HPSE	Prostate Cancer	IVW	4	0.151106	0.982372	1.37713	0.0861692	0.0794989	0.337777	1	0.254801	0.697927	2.3851	0.31349	0.501707	0.0208466	0.76363	0.233038	1.02867	1.5493	0.104473	0.025708	1.98617	0.370433	2.10452	0.550999
CCNH	Prostate Cancer	Wald ratio	1	-0.154132	0.721406	1.01846	0.0879699	0.0797569	0.33808	1
DSG2	Prostate Cancer	IVW	27	-0.035446	0.927557	1.00432	0.0202829	0.0805369	0.339794	1	0.00941078	0.913203	1.11585	0.0511265	0.855445	0.00606091	0.348324	-0.00284884	0.943085	1.05433	0.0284439	0.92022	15.4057	0.931382	16.3193	0.928212
HEXIM1	Prostate Cancer	IVW	2	-0.116884	0.780389	1.0143	0.0668766	0.0805056	0.339794	1															0.141422	0.706871
COL11A2	Prostate Cancer	IVW	37	-0.0497162	0.899772	1.0062	0.0285193	0.0812905	0.342176	1	0.0244734	0.941337	1.11561	0.0433304	0.575807	0.00562867	0.0348713	-0.0358587	0.925358	1.00587	0.0212838	0.0920295	151.481	1.93802e-16	172.337	1.05014e-19
TBCB	Prostate Cancer	Wald ratio	1	-0.214755	0.63285	1.02841	0.123861	0.0829453	0.348332	1
RAP1GDS1	Prostate Cancer	Wald ratio	1	-0.25262	0.583612	1.03384	0.145867	0.0832988	0.349007	1
KNG1	Prostate Cancer	IVW	28	0.027158	0.996407	1.05963	0.0156924	0.0835155	0.349107	1	-0.0334121	0.937541	0.997673	0.0158585	0.0406104	0.00256561	0.0584028	-0.0303822	0.941388	0.999636	0.0153152	0.0472792	41.2404	0.671573	45.0078	0.555427
LIFR	Prostate Cancer	IVW	19	0.0392955	0.994481	1.08777	0.0228724	0.085791	0.35697	1	-0.039267	0.879684	1.05091	0.0453703	0.398827	0.00563444	0.0611535	0.042352	0.977459	1.11349	0.0332405	0.202625	10.2953	0.890773	14.3153	0.708316
STARD5	Prostate Cancer	IVW	25	0.0416562	0.994163	1.09326	0.0242402	0.0857093	0.35697	1	0.0234972	0.953539	1.09919	0.0362613	0.523405	0.00526478	0.503498	0.0327963	0.983786	1.08539	0.025073	0.190863	42.4035	0.00814398	43.2551	0.00930063
PIP	Prostate Cancer	IVW	52	0.0170883	0.997581	1.03728	0.00995407	0.0860309	0.357147	1	0.0152766	0.987992	1.04356	0.0139579	0.27899	0.00275293	0.852385	0.0228362	0.996268	1.05065	0.0135586	0.0921321	52.3281	0.383702	52.3648	0.420791
BTNL9	Prostate Cancer	Wald ratio	1	-0.218374	0.625962	1.03223	0.127598	0.087002	0.35761	1
ESM1	Prostate Cancer	IVW	7	-0.0647733	0.870306	1.00941	0.0378248	0.0868124	0.35761	1	-0.0627493	0.672525	1.31156	0.170391	0.727752	0.0196626	0.990703	-0.0606719	0.862991	1.02635	0.0442241	0.170089	7.36795	0.194682	7.36817	0.288136
FCN1	Prostate Cancer	IVW	61	0.0204458	0.99707	1.0448	0.0119286	0.0865271	0.35761	1	0.0135406	0.972261	1.05677	0.0212611	0.526671	0.0028955	0.696215	0.0135492	0.9753	1.05349	0.0196734	0.491007	58.4982	0.493961	58.6521	0.525099
GSTZ1	Prostate Cancer	IVW	191	0.00608514	0.999118	1.01314	0.00355485	0.0869361	0.35761	1	0.0106583	0.999622	1.02193	0.00563099	0.0599145	0.0014818	0.29643	0.0140313	1.00272	1.02567	0.00577401	0.0150953	206.003	0.188434	207.198	0.186487
IL6ST	Prostate Cancer	IVW	29	0.0320259	0.995344	1.07113	0.0187206	0.0871305	0.35761	1	0.00983926	0.947168	1.07676	0.0327134	0.765893	0.00403862	0.414209	-0.00457507	0.945299	1.04823	0.026367	0.862247	31.2052	0.262796	32.0001	0.274508
PPP2R5A	Prostate Cancer	IVW	2	0.194101	0.971278	1.51793	0.1139	0.0883557	0.361002	1															1.09418	0.295546
SPINT2	Prostate Cancer	IVW	93	0.0264172	0.996053	1.05843	0.0154962	0.0882398	0.361002	1	0.0645072	1.01554	1.12029	0.0250418	0.0116064	0.00476666	0.0580522	0.0657857	1.04049	1.09624	0.0133143	7.77332e-07	391.597	6.49382e-39	407.452	2.88265e-41
PTPN9	Prostate Cancer	Wald ratio	1	-0.187496	0.667989	1.0289	0.110198	0.0888597	0.362243	1
DTYMK	Prostate Cancer	IVW	8	-0.206579	0.640831	1.03234	0.121638	0.0894504	0.363016	1	0.161452	0.629107	2.19538	0.318829	0.630648	0.0377223	0.26085	-0.0860993	0.763824	1.1021	0.0935298	0.357283	24.7536	0.000379237	31.1096	5.93448e-05
GHR	Prostate Cancer	IVW	16	0.0429064	0.993414	1.09683	0.0252625	0.0894285	0.363016	1	0.132469	1.02306	1.27398	0.0559569	0.0328586	0.00817712	0.0991821	0.0539	0.993281	1.12136	0.0309397	0.081491	14.8302	0.389862	18.1339	0.255692
MANF	Prostate Cancer	Wald ratio	1	-0.238611	0.597953	1.03771	0.140629	0.0897445	0.363395	1
TEK	Prostate Cancer	IVW	19	-0.0325432	0.932219	1.00511	0.0192061	0.0901859	0.364367	1	0.00164732	0.941578	1.06555	0.031554	0.958973	0.00359433	0.189838	-0.0131882	0.936343	1.04018	0.0268289	0.623026	12.4108	0.774648	14.2759	0.710938
RAB22A	Prostate Cancer	IVW	3	0.128113	0.979526	1.31905	0.075918	0.0915045	0.367705	1	0.124122	0.47184	2.71654	0.446549	0.827404	0.028888	0.994141	0.172682	0.981176	1.4396	0.0977986	0.0774483	1.97482	0.159937	1.97499	0.372509
SCARF2	Prostate Cancer	IVW	6	-0.098125	0.808865	1.016	0.0581624	0.0915868	0.367705	1	-0.0880811	0.62402	1.34368	0.195659	0.675903	0.0228188	0.959206	-0.107694	0.801563	1.00582	0.0579069	0.0629174	10.834	0.0284943	10.842	0.0546036
SPINT1	Prostate Cancer	IVW	9	0.0704383	0.988661	1.16449	0.0417559	0.0916215	0.367705	1	0.0101337	0.899206	1.13486	0.0593761	0.869312	0.0068731	0.2145	0.0444423	0.97204	1.12439	0.0371432	0.231497	11.0846	0.134973	14.035	0.0808571
CSK	Prostate Cancer	Wald ratio	1	-0.355776	0.463258	1.05963	0.211069	0.0918744	0.367904	1
CDH5	Prostate Cancer	IVW	7	0.067105	0.989035	1.15631	0.0398628	0.0922977	0.368328	1	0.0152562	0.769847	1.3392	0.141234	0.91818	0.0145294	0.715765	0.0445239	0.962108	1.13619	0.0424248	0.293958	7.76016	0.169958	7.99074	0.238783
SPINK1	Prostate Cancer	IVW	6	-0.0757119	0.848837	1.01254	0.044988	0.0923873	0.368328	1	-0.123547	0.721348	1.08279	0.103616	0.299022	0.00846126	0.635318	-0.0807977	0.830491	1.02444	0.0535409	0.131278	0.54778	0.968686	0.810413	0.976364
DTD2	Prostate Cancer	IVW	4	0.081255	0.986509	1.19255	0.0483866	0.0930965	0.37034	1	0.03642	0.866728	1.24094	0.091556	0.729228	0.0114224	0.622323	0.0777185	0.972059	1.20175	0.054111	0.150922	0.156402	0.924778	0.489145	0.92127
CHRDL2	Prostate Cancer	IVW	28	0.0245655	0.99583	1.05476	0.0146653	0.0939196	0.372795	1	0.0225703	0.97593	1.07198	0.0239464	0.354595	0.00332472	0.916869	0.0285124	0.986349	1.07333	0.0215599	0.186009	21.0323	0.740292	21.0435	0.784249
CDKN2D	Prostate Cancer	Wald ratio	1	-0.288762	0.534159	1.05078	0.172602	0.0943279	0.373596	1
CD244	Prostate Cancer	Wald ratio	1	-0.344204	0.473186	1.06169	0.206155	0.0949915	0.373655	1
HPCAL1	Prostate Cancer	IVW	4	-0.0933785	0.816379	1.01625	0.0558665	0.0946312	0.373655	1	-0.248989	0.610745	0.995109	0.124534	0.183589	0.0130769	0.296951	-0.123225	0.784713	0.995995	0.0608223	0.0427662	0.129693	0.937211	2.08444	0.555067
PCOLCE2	Prostate Cancer	IVW	73	0.017273	0.99699	1.03828	0.0103509	0.0951685	0.373655	1	0.0243169	0.992744	1.05751	0.0161222	0.135919	0.00256525	0.569288	0.00955267	0.981302	1.03871	0.0145037	0.510128	98.0962	0.0183045	98.5479	0.020615
TEPSIN	Prostate Cancer	IVW	2	-0.172115	0.68795	1.03026	0.103022	0.0947898	0.373655	1															0.00477592	0.944904
GMPR	Prostate Cancer	IVW	217	-0.00759223	0.983599	1.00135	0.00456363	0.0961847	0.375564	1	-0.0182037	0.967743	0.996387	0.0074411	0.0152331	0.00179794	0.0732729	-0.0110696	0.976453	1.00169	0.00650956	0.0890342	287.085	0.000734026	291.411	0.000472048
HBZ	Prostate Cancer	IVW	101	-0.0120181	0.974157	1.00215	0.00722698	0.0963217	0.375564	1	-0.00434508	0.971441	1.02049	0.0125662	0.730245	0.00278161	0.456701	-0.00213216	0.977778	1.01837	0.0103777	0.837215	112.873	0.161047	113.51	0.168022
INHBA	Prostate Cancer	Wald ratio	1	-0.141433	0.734683	1.02578	0.0851441	0.0966923	0.375564	1
INHBA	Prostate Cancer	Wald ratio	1	-0.140236	0.736603	1.02555	0.0844233	0.0966923	0.375564	1
SERPINA5	Prostate Cancer	IVW	23	-0.0499137	0.896942	1.00898	0.0300256	0.0964386	0.375564	1	-0.134544	0.785596	0.972607	0.0544737	0.0221717	0.00679886	0.0823712	-0.0765479	0.880284	0.974739	0.0260011	0.00323976	49.9781	0.00036737	57.8985	4.54699e-05
GC	Prostate Cancer	IVW	8	-0.0806843	0.838546	1.01483	0.0486743	0.0973907	0.37655	1	0.0442193	0.787906	1.38654	0.144181	0.769442	0.0169488	0.392273	-0.0458431	0.867036	1.05231	0.0494037	0.353445	9.63934	0.140685	11.0039	0.138447
LYZ	Prostate Cancer	IVW	101	-0.0162243	0.965194	1.00298	0.00979707	0.0977155	0.37655	1	0.023739	0.985155	1.06442	0.0197423	0.23206	0.00275148	0.0226306	-0.0152708	0.958254	1.01217	0.0139649	0.274171	112.926	0.160202	119.044	0.0940926
NEO1	Prostate Cancer	IVW	12	0.0628535	0.988616	1.14701	0.0379095	0.0973199	0.37655	1	0.108298	0.934427	1.32899	0.089857	0.255862	0.0103368	0.586581	0.0410973	0.957584	1.13376	0.0430812	0.340109	17.3901	0.0661648	17.9391	0.0830038
PMM1	Prostate Cancer	Wald ratio	1	-0.230096	0.60503	1.04319	0.13897	0.0977781	0.37655	1
TMEM190	Prostate Cancer	IVW	230	-0.00778682	0.983126	1.00145	0.0047098	0.098265	0.377621	1	-0.00970461	0.975596	1.00531	0.00765418	0.206133	0.00162441	0.750599	-0.0181893	0.968549	0.995587	0.00702396	0.00960855	319.654	5.83014e-05	319.796	6.82928e-05
LRRC32	Prostate Cancer	IVW	3	0.151961	0.971841	1.39443	0.0921041	0.0989676	0.378131	1	-0.0229163	0.356624	2.67845	0.514365	0.971656	0.0409501	0.78559	0.15293	0.967094	1.40399	0.0950969	0.107802	2.37766	0.123082	2.66915	0.26327
ROR2	Prostate Cancer	IVW	19	-0.0490547	0.89828	1.00921	0.0297033	0.0986388	0.378131	1	-0.0406383	0.809329	1.13914	0.0871998	0.647105	0.0090691	0.919128	-0.0447143	0.888151	1.02961	0.0377035	0.235644	21.9683	0.185942	21.982	0.232786
SERPING1	Prostate Cancer	IVW	64	0.0155331	0.997081	1.03457	0.0094163	0.0990244	0.378131	1	0.0271797	0.993646	1.06262	0.0171195	0.117454	0.00380472	0.417879	0.026039	1.00315	1.05015	0.0116802	0.0257923	99.652	0.00171604	100.721	0.00178688
AP1G2	Prostate Cancer	IVW	6	0.0578298	0.989024	1.13507	0.035136	0.0997875	0.378276	1	0.0989804	0.975602	1.2494	0.0631025	0.191827	0.0104147	0.476296	0.0698196	0.983094	1.16963	0.0443216	0.115189	2.2996	0.680841	2.91596	0.712941
CNTN1	Prostate Cancer	IVW	49	-0.0209337	0.955165	1.00401	0.012723	0.0998983	0.378276	1	-0.0139154	0.935201	1.03994	0.0270806	0.609763	0.00353814	0.770369	-0.0123267	0.952155	1.02467	0.0187248	0.510338	28.8936	0.982592	28.9798	0.986441
FKBP1B	Prostate Cancer	IVW	15	0.0486317	0.990757	1.11243	0.02955	0.0998163	0.378276	1	0.0454035	0.926145	1.18238	0.06231	0.479125	0.0102798	0.953449	0.0591978	0.99664	1.12948	0.0319201	0.0636589	22.564	0.0472154	22.5702	0.0676331
KPNA6	Prostate Cancer	Wald ratio	1	-0.208402	0.633679	1.0402	0.126434	0.0992894	0.378276	1
IGSF8	Prostate Cancer	IVW	5	-0.0682535	0.861002	1.01324	0.0415334	0.100313	0.379053	1	0.00326626	0.849499	1.18488	0.0848851	0.971723	0.00912106	0.405263	-0.047445	0.872161	1.04278	0.0455798	0.297912	2.63131	0.452026	3.56464	0.468117
AHSG	Prostate Cancer	IVW	65	0.0222634	0.995681	1.05007	0.0135673	0.100805	0.379496	1	0.0123022	0.957332	1.07059	0.0285238	0.667727	0.00347168	0.692134	0.0218974	0.983053	1.06278	0.0198929	0.270998	72.2729	0.198369	72.4544	0.219159
DOC2B	Prostate Cancer	Wald ratio	1	-0.292252	0.526458	1.05874	0.178231	0.101059	0.379496	1
PPA1	Prostate Cancer	IVW	18	-0.036509	0.922979	1.00716	0.022265	0.101058	0.379496	1	-0.0715421	0.848605	1.0213	0.0472546	0.149536	0.00573718	0.413004	-0.0563644	0.890564	1.00318	0.0303757	0.0635139	8.70547	0.925045	9.41194	0.926446
ANG	Prostate Cancer	IVW	116	-0.0126475	0.972561	1.00253	0.00774255	0.102362	0.381618	1	-0.00497583	0.971373	1.01928	0.01228	0.686092	0.00201531	0.422104	-0.0115958	0.967584	1.00981	0.0108964	0.287244	128.049	0.17401	128.778	0.179285
APOA1	Prostate Cancer	IVW	24	-0.0283683	0.939506	1.00568	0.0173638	0.102309	0.381618	1	-0.0281097	0.922237	1.02504	0.0269608	0.30845	0.00358066	0.990108	-0.0277604	0.928675	1.01865	0.0235896	0.239273	13.6843	0.912305	13.6844	0.935553
BCL10	Prostate Cancer	Wald ratio	1	-0.217686	0.619429	1.04455	0.133302	0.102463	0.381618	1
LIPN	Prostate Cancer	IVW	138	0.0116432	0.997671	1.02595	0.00712989	0.102468	0.381618	1	0.0145373	0.989977	1.03992	0.0125564	0.248989	0.00259961	0.779544	0.0143604	0.995122	1.03418	0.00982177	0.143714	241.314	6.98289e-08	241.454	9.11039e-08
ALDH1A1	Prostate Cancer	IVW	5	-0.0839305	0.831211	1.01716	0.0515004	0.103163	0.38342	1	-0.0456221	0.712566	1.281	0.149623	0.780362	0.0125004	0.80278	-0.101074	0.798752	1.02281	0.063077	0.10907	1.47851	0.68724	1.55287	0.817237
SNX8	Prostate Cancer	IVW	9	-0.0532176	0.889255	1.011	0.0327313	0.103972	0.385635	1	0.0114388	0.932586	1.0971	0.0414454	0.790522	0.00586283	0.0574065	-0.0153476	0.912342	1.06295	0.0389756	0.693748	4.29233	0.745558	9.44904	0.305842
BOLA3	Prostate Cancer	IVW	2	-0.0905096	0.818819	1.01905	0.0558075	0.104842	0.38764	1															0.117013	0.732297
LILRA4	Prostate Cancer	IVW	68	0.0189208	0.996014	1.04272	0.0116913	0.105584	0.38764	1	-0.00437895	0.956457	1.03641	0.0204799	0.831349	0.00291733	0.171872	0.0112961	0.975127	1.04894	0.0186139	0.543943	71.7549	0.29298	73.829	0.264947
PLEKHA1	Prostate Cancer	IVW	34	0.0272226	0.99431	1.062	0.0168005	0.105159	0.38764	1	-0.000233302	0.929919	1.07486	0.0369512	0.995002	0.00451331	0.409768	0.0344744	0.985283	1.08738	0.0251533	0.170509	36.1156	0.282132	36.903	0.293188
RNASE6	Prostate Cancer	IVW	168	0.00771512	0.998377	1.0172	0.00476491	0.105414	0.38764	1	0.00363967	0.990045	1.01743	0.00696134	0.601783	0.00148261	0.423099	0.00907365	0.994158	1.0243	0.00761889	0.233676	157.632	0.666568	158.277	0.673369
SEMA6A	Prostate Cancer	IVW	7	0.0740474	0.984588	1.17777	0.0457038	0.105198	0.38764	1	0.0691546	0.639566	1.79549	0.263327	0.803322	0.0240584	0.985632	0.0927491	0.976526	1.23276	0.0594403	0.118672	6.34888	0.273736	6.34933	0.385216
CPB2	Prostate Cancer	IVW	73	0.0157763	0.99655	1.03563	0.00981238	0.107879	0.3935	1	0.030793	0.996419	1.06734	0.0175411	0.0834918	0.0028825	0.305208	0.00916976	0.979867	1.03944	0.0150553	0.542478	63.2182	0.733039	64.2849	0.729512
MYOM2	Prostate Cancer	IVW	10	0.0998835	0.978432	1.24804	0.0620853	0.107658	0.3935	1	0.144009	0.821882	1.62284	0.173555	0.430735	0.014069	0.790596	0.00501902	0.868598	1.16289	0.0744354	0.946241	12.1954	0.142697	12.3103	0.196376
RBP4	Prostate Cancer	IVW	2	-0.124595	0.75839	1.02774	0.0775316	0.108049	0.3935	1															0.00229966	0.961752
VEGFA	Prostate Cancer	IVW	92	-0.0124388	0.972771	1.00273	0.00773844	0.107966	0.3935	1	-0.00882379	0.927717	1.05906	0.0337781	0.796241	0.00472681	0.429866	-0.0148378	0.960936	1.01022	0.0127603	0.244909	11.114	0.981995	86.6141	0.610582
PROS1	Prostate Cancer	IVW	3	-0.117086	0.771064	1.02615	0.0729072	0.108283	0.393557	1	-0.061134	0.645979	1.36988	0.191762	0.80353	0.0126478	0.805457	-0.0798809	0.779636	1.09326	0.0862487	0.354358	0.914652	0.338883	1.01417	0.602248
TEC	Prostate Cancer	IVW	11	0.0620791	0.98633	1.14789	0.0386955	0.108648	0.394095	1	-0.0914984	0.739933	1.12547	0.106989	0.414618	0.0100938	0.161286	0.068582	0.97648	1.17464	0.0471344	0.145661	9.11106	0.427087	11.4693	0.322142
ADAMTSL2	Prostate Cancer	IVW	10	-0.0820422	0.833154	1.01862	0.0512725	0.109572	0.394286	1	-0.18556	0.537237	1.28428	0.222325	0.428142	0.0164987	0.64423	-0.0815468	0.834522	1.01796	0.0506887	0.107666	17.4927	0.0253683	17.996	0.0352194
COL6A2	Prostate Cancer	IVW	39	0.0298942	0.993309	1.06876	0.0186772	0.109472	0.394286	1	0.0469597	0.973372	1.12852	0.0377288	0.221081	0.0041117	0.604614	0.0276685	0.976157	1.08271	0.0264287	0.295139	45.5566	0.157895	45.8924	0.177582
CSRP1	Prostate Cancer	Wald ratio	1	-0.121147	0.763732	1.02762	0.0757098	0.109565	0.394286	1
SLMAP	Prostate Cancer	Wald ratio	1	-0.25031	0.573241	1.05742	0.156193	0.10903	0.394286	1
HSPG2	Prostate Cancer	IVW	29	-0.0286662	0.938075	1.00661	0.0179894	0.111046	0.397234	1	-0.0592557	0.889993	0.998032	0.0292275	0.052598	0.00352321	0.198682	-0.0268486	0.922427	1.02742	0.0274993	0.328896	28.4974	0.385682	30.33	0.34762
ITGA2	Prostate Cancer	IVW	3	0.131648	0.970184	1.3412	0.0826107	0.111027	0.397234	1	0.209511	0.660844	2.30081	0.318239	0.629348	0.0245842	0.837033	0.124025	0.982537	1.3043	0.0722663	0.0861212	3.07448	0.07953	3.28509	0.193487
NTNG1	Prostate Cancer	IVW	76	0.0102411	0.997647	1.0231	0.00642682	0.11105	0.397234	1	0.0191217	1.0002	1.03878	0.00965382	0.0513372	0.00196223	0.222783	0.0154626	0.997304	1.0342	0.00926624	0.095177	74.49	0.462159	76.0117	0.445657
APLP2	Prostate Cancer	IVW	4	0.0679094	0.98411	1.16397	0.0428199	0.112755	0.401746	1	0.0658409	0.909402	1.25439	0.0820454	0.506473	0.0108032	0.979105	0.0771255	0.983314	1.18658	0.0479349	0.107624	0.18658	0.910929	0.187454	0.979589
GNMT	Prostate Cancer	IVW	18	-0.040561	0.913321	1.00959	0.0255644	0.112599	0.401746	1	0.00735688	0.91791	1.10558	0.0474558	0.87874	0.00565602	0.250409	-0.0575812	0.893319	0.997652	0.0281788	0.041011	21.8448	0.148275	23.7867	0.125349
ACAT2	Prostate Cancer	IVW	31	-0.10552	0.789513	1.02562	0.0667447	0.11389	0.402063	1	-0.294435	0.538822	1.02994	0.165273	0.0853059	0.0168234	0.22228	-0.162675	0.78478	0.920352	0.0406513	6.28826e-05	307.438	2.73957e-48	323.93	4.89741e-51
CNTN5	Prostate Cancer	IVW	35	0.0267809	0.993605	1.06181	0.0169367	0.113826	0.402063	1	0.0305552	0.971342	1.09438	0.0304244	0.322542	0.0031784	0.881413	0.0271131	0.980484	1.07674	0.0238887	0.256385	38.7161	0.22732	38.7426	0.264208
IL17RD	Prostate Cancer	IVW	53	-0.0184153	0.959628	1.00439	0.0116297	0.113313	0.402063	1	-0.0353024	0.927531	1.00463	0.0203707	0.0891389	0.00366684	0.317444	-0.037593	0.935593	0.991426	0.0147866	0.0110103	73.4325	0.0214973	74.9002	0.0204566
MAP2K3	Prostate Cancer	Wald ratio	1	0.249244	0.94213	1.74735	0.15758	0.113717	0.402063	1
MINPP1	Prostate Cancer	IVW	7	0.0856849	0.979647	1.21159	0.0542081	0.113955	0.402063	1	0.00258038	0.650321	1.54566	0.220852	0.99113	0.0172785	0.713871	0.0611109	0.93145	1.21317	0.0674101	0.364643	4.15984	0.52664	4.31051	0.634734
ABHD10	Prostate Cancer	Wald ratio	1	0.227871	0.94635	1.66677	0.144395	0.114541	0.40256	1
GSTP1	Prostate Cancer	IVW	11	-0.0958631	0.806653	1.0234	0.0607135	0.114349	0.40256	1	0.26176	0.990874	1.70351	0.138229	0.0908017	0.0126372	0.0223921	-0.109037	0.79711	1.00873	0.0600644	0.0694734	17.1612	0.0462499	31.6057	0.000465725
HMBS	Prostate Cancer	IVW	2	-0.168593	0.685104	1.04185	0.106935	0.114889	0.403002	1															0.168941	0.681054
LMAN2L	Prostate Cancer	IVW	6	0.0894134	0.97837	1.22225	0.0567761	0.115293	0.403637	1	0.113163	0.861769	1.45513	0.133639	0.444803	0.011798	0.850023	0.0575791	0.932635	1.2031	0.0649594	0.375409	7.93549	0.0939702	8.01616	0.155347
GMPR2	Prostate Cancer	IVW	16	-0.0368281	0.92058	1.00914	0.0234304	0.115995	0.404531	1	-0.0138068	0.916306	1.06161	0.03755	0.718602	0.00529664	0.442121	-0.0125195	0.930996	1.04756	0.0300924	0.677385	14.9396	0.382297	15.6073	0.408618
MMP2	Prostate Cancer	IVW	4	0.0931768	0.977265	1.23288	0.0592725	0.115949	0.404531	1	0.638951	1.0249	3.50192	0.313449	0.17837	0.0270689	0.218595	0.118929	0.993648	1.27664	0.0639291	0.0628396	0.089482	0.956245	3.22552	0.358145
SEZ6L	Prostate Cancer	IVW	14	-0.0598188	0.874006	1.01514	0.0381883	0.117251	0.408123	1	-0.0613579	0.755509	1.17075	0.111738	0.592991	0.00918897	0.988483	-0.034069	0.879015	1.0627	0.0484105	0.481588	15.9188	0.194985	15.9191	0.253528
CEL	Prostate Cancer	IVW	70	-0.0171118	0.962131	1.00439	0.0109659	0.118652	0.411286	1	0.0131118	0.983264	1.04404	0.0153007	0.394486	0.00196866	0.00841655	-0.00563258	0.964666	1.02502	0.0154801	0.715964	74.1582	0.284441	82.1909	0.132571
FLRT2	Prostate Cancer	IVW	46	0.0247704	0.993662	1.05749	0.0158819	0.118841	0.411286	1	0.0480831	0.979772	1.12367	0.0349586	0.17596	0.00407149	0.457522	0.0270344	0.980154	1.07693	0.0240206	0.26039	53.3761	0.157169	54.0576	0.166886
IDI1	Prostate Cancer	IVW	2	0.155751	0.96093	1.42099	0.0997981	0.118605	0.411286	1															0.120993	0.72796
CD200R1	Prostate Cancer	IVW	4	-0.0786067	0.837375	1.02048	0.0504475	0.119189	0.411702	1						0.0246653	0.491539	-0.0938266	0.817235	1.01428	0.0551033	0.0886165	2.39585	0.301819	3.23123	0.35733
ASPN	Prostate Cancer	IVW	59	-0.0176295	0.960855	1.00468	0.0113786	0.121295	0.415803	1	0.0271886	0.980582	1.07679	0.0238764	0.259582	0.00403156	0.0385846	-0.0135964	0.95425	1.01983	0.0169557	0.422621	67.5096	0.160798	72.8206	0.0910286
CNTN2	Prostate Cancer	IVW	132	-0.0147346	0.967181	1.00391	0.00950781	0.121205	0.415803	1	0.000673704	0.968764	1.03363	0.0165344	0.967561	0.0032231	0.25704	0.00382239	0.984531	1.02351	0.00990444	0.699551	320.074	4.81277e-18	323.265	2.90597e-18
LEFTY2	Prostate Cancer	IVW	17	-0.05088	0.891239	1.01347	0.0327872	0.120704	0.415803	1	0.00585982	0.984722	1.02749	0.0108449	0.589981	0.00251697	0.00769427	-0.0696613	0.870761	0.999066	0.0350646	0.0469605	188.516	5.12763e-05	28.7644	0.0255738
S100A2	Prostate Cancer	Wald ratio	1	0.251095	0.93588	1.76554	0.16192	0.120964	0.415803	1
GALNT13	Prostate Cancer	Wald ratio	1	-0.203628	0.63035	1.05572	0.131557	0.121662	0.416273	1
GDI2	Prostate Cancer	IVW	3	-0.272187	0.538856	1.07674	0.176592	0.123236	0.420864	1	0.37218	0.611463	3.44272	0.440858	0.553648	0.0325372	0.367244	-0.171405	0.732842	0.96852	0.0711324	0.0159673	4.82301	0.0280822	16.2139	0.000301433
FBLN5	Prostate Cancer	IVW	4	0.0951455	0.973896	1.24202	0.0620391	0.125119	0.423069	1	0.313109	0.872941	2.14278	0.229079	0.305046	0.0178088	0.427136	0.119114	0.979716	1.29527	0.0712278	0.094466	0.210696	0.900011	1.18765	0.755967
FCRLB	Prostate Cancer	IVW	60	-0.016508	0.963123	1.00457	0.0107478	0.124551	0.423069	1	-0.0261647	0.939293	1.01035	0.0186034	0.164928	0.00274572	0.527311	-0.0182334	0.952291	1.0125	0.0156383	0.243637	55.1519	0.581874	55.5563	0.603215
GSTM1	Prostate Cancer	IVW	155	0.0079852	0.997798	1.01834	0.00519875	0.124542	0.423069	1	0.00269643	0.987951	1.01767	0.00756068	0.721854	0.00166434	0.336868	0.00472725	0.988634	1.02111	0.00824413	0.566368	149.383	0.567589	150.311	0.569002
MSMP	Prostate Cancer	Wald ratio	1	-0.173864	0.672899	1.04962	0.113417	0.125284	0.423069	1
PLXNC1	Prostate Cancer	IVW	126	0.0105203	0.997076	1.02426	0.00686161	0.125223	0.423069	1	0.00761572	0.987335	1.02837	0.0103888	0.4649	0.00179464	0.709512	0.010846	0.990719	1.0315	0.0102912	0.291921	164.577	0.00863894	164.762	0.00990484
REG3G	Prostate Cancer	IVW	88	-0.0115655	0.974017	1.0032	0.00753126	0.124621	0.423069	1	-0.0267921	0.94987	0.997848	0.0125703	0.0359114	0.00251492	0.135513	-0.0124491	0.966023	1.00972	0.0112848	0.26995	89.2447	0.383971	91.601	0.347092
NPTXR	Prostate Cancer	IVW	30	0.0208108	0.994181	1.0486	0.0135953	0.125835	0.423219	1	0.0205686	0.985818	1.05698	0.0177815	0.257152	0.00378157	0.982857	0.0234441	0.994162	1.05416	0.0149485	0.116806	43.1436	0.0337086	43.1443	0.0441494
PLCG2	Prostate Cancer	IVW	8	0.0745275	0.979368	1.18519	0.0486609	0.125629	0.423219	1	0.0196369	0.8001	1.29991	0.123804	0.879178	0.011219	0.643104	0.0630668	0.972173	1.1669	0.0465754	0.175711	13.6728	0.033513	14.2147	0.0474924
PPIC	Prostate Cancer	IVW	79	-0.0138459	0.96891	1.0039	0.00904991	0.12603	0.423219	1	-0.00477477	0.960661	1.03106	0.01804	0.791966	0.00288003	0.562199	-0.0292626	0.945302	0.997728	0.0137696	0.0335739	79.0913	0.41268	79.4394	0.433343
ADH1B	Prostate Cancer	Wald ratio	1	0.0799908	0.97768	1.20028	0.0523283	0.126355	0.423524	1
DEFB1	Prostate Cancer	IVW	68	-0.0172724	0.961241	1.005	0.0113557	0.128251	0.429085	1	-0.0177972	0.939819	1.02683	0.022587	0.433555	0.00310851	0.97864	-0.00492683	0.963844	1.02734	0.0162748	0.762097	53.436	0.867104	53.4367	0.885508
TMEM132C	Prostate Cancer	IVW	44	0.0224718	0.993469	1.05285	0.0148084	0.12914	0.431261	1	0.0278047	0.974395	1.08496	0.0274199	0.316373	0.0031642	0.817538	0.025627	0.980017	1.07405	0.0233737	0.272904	45.7536	0.319091	45.8123	0.356261
DNAJB14	Prostate Cancer	Wald ratio	1	0.182138	0.948053	1.51835	0.120144	0.12952	0.431623	1
TNR	Prostate Cancer	IVW	5	0.0637349	0.981463	1.15741	0.0420641	0.129725	0.431623	1	0.189322	0.949597	1.53781	0.12298	0.221323	0.0115987	0.356663	0.0817412	0.990929	1.18838	0.0463541	0.0778314	2.29401	0.513669	3.47504	0.481684
APOL1	Prostate Cancer	IVW	35	-0.0238508	0.946683	1.00711	0.0157858	0.130814	0.433651	1	-0.0482673	0.905555	1.00268	0.0259896	0.0722302	0.00390706	0.24694	-0.0309015	0.932545	1.00807	0.0198654	0.119818	40.9258	0.161688	42.6489	0.146742
CDKN1B	Prostate Cancer	Wald ratio	1	-0.13778	0.728743	1.04172	0.09115	0.130641	0.433651	1
COLEC11	Prostate Cancer	IVW	130	-0.0103288	0.97652	1.00311	0.00685246	0.13173	0.434097	1	-0.0104368	0.969029	1.01064	0.0107263	0.332382	0.00195704	0.989553	-0.0119609	0.965677	1.01106	0.0117169	0.307338	155.067	0.0519423	155.068	0.0587022
CSNK2B	Prostate Cancer	Wald ratio	1	-0.350538	0.446747	1.11036	0.232258	0.131233	0.434097	1
KIT	Prostate Cancer	Wald ratio	1	0.226572	0.934091	1.68426	0.150384	0.131908	0.434097	1
TNC	Prostate Cancer	IVW	143	0.00797605	0.997614	1.01851	0.00528815	0.131481	0.434097	1	0.00888995	0.992055	1.02609	0.00860542	0.303342	0.00178281	0.892881	0.0165428	0.998385	1.03531	0.00926477	0.0741704	144.91	0.393454	144.928	0.416016
ITIH3	Prostate Cancer	IVW	86	-0.0133155	0.969815	1.00403	0.00884434	0.132185	0.434219	1	-0.00997608	0.958832	1.02233	0.0163586	0.543616	0.00305902	0.808423	-0.0095351	0.964777	1.01693	0.01343	0.477714	113.659	0.0172694	113.739	0.0204065
CPB1	Prostate Cancer	IVW	11	-0.041943	0.907797	1.01293	0.0279548	0.133514	0.435965	1	-0.0511528	0.853698	1.05746	0.0546045	0.373323	0.00668329	0.848701	-0.0382121	0.903439	1.02544	0.0323134	0.236989	7.12816	0.623778	7.16671	0.709618
ENGASE	Prostate Cancer	IVW	100	-0.0116771	0.973422	1.00359	0.00778606	0.13368	0.435965	1	-0.0267525	0.951462	0.996258	0.0117365	0.0248099	0.00197518	0.0915407	-0.0136359	0.964234	1.00919	0.0116252	0.24081	110.903	0.175882	114.189	0.141071
STAMBP	Prostate Cancer	Wald ratio	1	0.343026	0.900149	2.20615	0.228684	0.133614	0.435965	1
XRCC4	Prostate Cancer	Wald ratio	1	0.0975676	0.970593	1.2523	0.0650078	0.133392	0.435965	1
GPC6	Prostate Cancer	IVW	2	0.200757	0.939623	1.59009	0.134201	0.134668	0.437734	1															1.85026	0.173753
GSTM4	Prostate Cancer	IVW	148	0.00793917	0.997529	1.01852	0.00531297	0.135097	0.437734	1	-0.00567669	0.979997	1.00889	0.00741279	0.445033	0.00177815	0.0107553	0.00231035	0.984995	1.01994	0.00889234	0.795008	158.277	0.230251	165.514	0.140963
H6PD	Prostate Cancer	IVW	95	-0.0122947	0.971981	1.00384	0.0082266	0.135043	0.437734	1	-0.0236282	0.95019	1.00384	0.0140129	0.0951146	0.00246704	0.320345	0.00421034	0.980232	1.02879	0.0123346	0.732845	111.01	0.0981874	112.201	0.0971059
PSAPL1	Prostate Cancer	IVW	56	-0.0157725	0.964191	1.00493	0.0105576	0.13519	0.437734	1	-0.00747858	0.958024	1.02832	0.0180633	0.680499	0.00245625	0.573821	-0.0123751	0.957716	1.01863	0.0157292	0.431422	49.5545	0.646337	49.8747	0.670254
CCDC134	Prostate Cancer	IVW	6	-0.0667926	0.856642	1.02138	0.0448687	0.136587	0.440312	1	-0.101839	0.651341	1.25238	0.166777	0.574436	0.0132082	0.837047	-0.063027	0.836819	1.05347	0.0587351	0.283239	4.58682	0.332377	4.64204	0.461107
FCN3	Prostate Cancer	IVW	25	-0.0209867	0.952535	1.00668	0.0141027	0.136716	0.440312	1	-0.0131248	0.951452	1.02379	0.0186943	0.489677	0.00395587	0.521294	-0.0356704	0.931083	1.00007	0.0182328	0.0504189	26.5328	0.276363	27.0222	0.303418
PCSK7	Prostate Cancer	IVW	177	-0.00820979	0.981169	1.00259	0.00551049	0.136265	0.440312	1	-0.00348711	0.979306	1.01403	0.00888973	0.695342	0.00160777	0.499294	-0.00192826	0.980422	1.01604	0.00910386	0.832258	170.954	0.572297	171.413	0.583573
PLXNB2	Prostate Cancer	IVW	83	0.0133942	0.995738	1.03155	0.00901312	0.137258	0.441273	1	0.0031897	0.968147	1.03951	0.0181433	0.860885	0.00322187	0.518291	0.0168368	0.989348	1.04538	0.014054	0.230915	100.298	0.0719276	100.819	0.0776217
GLTPD2	Prostate Cancer	IVW	21	0.0247841	0.992101	1.05918	0.0166912	0.137581	0.441528	1	0.0584023	1.01147	1.11115	0.023977	0.0248788	0.00417554	0.0784872	0.0594945	1.01756	1.10692	0.0214729	0.00559402	21.0654	0.333198	24.8997	0.205294
NPNT	Prostate Cancer	IVW	11	-0.0850312	0.820687	1.02793	0.0574401	0.138781	0.443804	1	-0.0725382	0.64768	1.33547	0.184602	0.703507	0.0210428	0.944458	-0.118714	0.801643	0.983798	0.052234	0.0230427	25.517	0.00244945	25.5316	0.00442399
WFIKKN2	Prostate Cancer	IVW	77	-0.0138031	0.968432	1.00448	0.00932324	0.138738	0.443804	1	-0.0128394	0.959751	1.01552	0.014409	0.375744	0.00228273	0.929997	-0.000816172	0.971864	1.02727	0.0141445	0.953986	85.8855	0.183277	85.8944	0.205059
BCAN	Prostate Cancer	IVW	12	-0.0611093	0.867526	1.02009	0.041327	0.139226	0.444443	1	0.0240045	0.833766	1.25836	0.105004	0.823782	0.0127248	0.397764	-0.0326545	0.904321	1.03589	0.034651	0.345997	22.5729	0.0124378	24.3344	0.0113946
SERPIND1	Prostate Cancer	Wald ratio	1	-0.258929	0.54666	1.08988	0.17602	0.141287	0.450229	1
VWF	Prostate Cancer	IVW	7	-0.0661148	0.856895	1.02246	0.0450638	0.142339	0.452783	1	0.0942105	0.906986	1.33116	0.097877	0.379985	0.00813391	0.128708	-0.0605984	0.849244	1.04312	0.0524542	0.247983	3.44654	0.631492	6.75236	0.344357
CPZ	Prostate Cancer	IVW	2	-0.19272	0.636583	1.06844	0.132102	0.1446	0.459168	1															2.20837	0.137264
CRP	Prostate Cancer	IVW	13	-0.0353861	0.920357	1.0123	0.0242896	0.14516	0.459334	1	0.00574884	0.903869	1.11915	0.0544997	0.917891	0.00647694	0.417105	-0.0218811	0.922528	1.03756	0.0299779	0.465448	3.21813	0.987518	3.92902	0.984683
GATM	Prostate Cancer	IVW	14	0.0398933	0.986331	1.09807	0.0273757	0.145046	0.459334	1	0.0526555	0.924459	1.20185	0.0669401	0.446769	0.00749629	0.838015	0.0427136	0.969223	1.12377	0.0377419	0.257748	9.15161	0.689929	9.19526	0.758042
NQO2	Prostate Cancer	IVW	180	-0.00860126	0.980008	1.003	0.00591501	0.145907	0.460888	1	0.0120193	0.993023	1.03153	0.00970432	0.217141	0.0018345	0.00865447	-0.000867454	0.981294	1.0173	0.00919172	0.924813	211.502	0.043647	219.876	0.0202068
SEMA3C	Prostate Cancer	IVW	3	-0.0847695	0.819468	1.03	0.0583318	0.14616	0.460888	1	0.00714892	0.507456	1.99899	0.349742	0.986989	0.0322248	0.83217	-0.0524196	0.845621	1.06486	0.0588085	0.372736	2.1569	0.141931	2.31403	0.314423
MPPED2	Prostate Cancer	IVW	4	0.0942536	0.967503	1.248	0.0649443	0.146697	0.461775	1	0.260456	1.07444	1.56691	0.0962509	0.113735	0.00786941	0.182006	0.134426	1.0265	1.27468	0.0552406	0.0149551	1.15373	0.561657	5.1981	0.157853
HAVCR1	Prostate Cancer	IVW	55	0.0159267	0.994345	1.03824	0.0110193	0.148361	0.466205	1	0.00725152	0.969584	1.04644	0.0194588	0.710888	0.00300134	0.589673	0.00687436	0.975954	1.03882	0.0159257	0.665994	58.5949	0.27771	58.9204	0.3003
IL10RB	Prostate Cancer	IVW	2	-0.268012	0.531264	1.10128	0.185961	0.14952	0.469032	1															5.99248	0.014367
ALCAM	Prostate Cancer	IVW	15	-0.0469077	0.895169	1.01707	0.0325687	0.149791	0.469069	1	-0.0011676	0.866749	1.15105	0.0723663	0.987372	0.00643974	0.491567	-0.0222844	0.897016	1.06621	0.0440804	0.61318	8.8103	0.787115	9.31127	0.810609
PROC	Prostate Cancer	IVW	17	0.0494998	0.982225	1.12405	0.0344056	0.150232	0.469637	1	0.102549	0.915721	1.34063	0.097241	0.308305	0.00955154	0.567197	0.0507527	0.970342	1.14067	0.0412547	0.218612	23.3996	0.0760165	23.9336	0.0909652
SERPINB8	Prostate Cancer	IVW	17	0.0337966	0.987776	1.08317	0.0235184	0.150711	0.470323	1	-0.0310047	0.859812	1.09312	0.0612434	0.620038	0.0074445	0.269766	0.0154277	0.954229	1.08081	0.0317753	0.627305	13.1112	0.593713	14.4244	0.567131
PDGFD	Prostate Cancer	IVW	48	-0.0182835	0.957665	1.00671	0.0127416	0.151303	0.471358	1	-0.0454495	0.907147	1.00657	0.026531	0.0934331	0.00340233	0.249234	-0.0208034	0.943033	1.01719	0.0193115	0.281365	45.744	0.482903	47.1058	0.468228
LCT	Prostate Cancer	IVW	73	0.00562419	0.997935	1.0134	0.00392406	0.151784	0.472042	1	0.0125636	0.999752	1.0257	0.00653657	0.0586125	0.0028897	0.189884	0.00590272	0.993348	1.01865	0.00641706	0.357652	71.7682	0.452174	73.5391	0.427458
TXNL4B	Prostate Cancer	IVW	13	-0.0567903	0.873886	1.02145	0.0398038	0.15365	0.477027	1	-0.0255201	0.867995	1.09475	0.0592089	0.67478	0.00693377	0.483129	-0.0725149	0.869363	0.994978	0.0344286	0.0351838	32.3707	0.000664923	33.9209	0.00069419
[truncated: 1,227 more rows]

## Sheet: Supplementary File 1D
Protein	Outcome	Method	Main MR results								Egger					Egger Intercept		Weighted Median					Heterogeneity				Coloc					MR-PRESSO			MR-PRESSO corrected
																							Egger		IVW
[truncated: 1,945 more rows]

## Sheet: Supplementary File 1E
Proteins with FDR corrected significant associations in both datasets
[truncated: 22 more rows]

[truncated: 1 more sheets: Supplementary File 1F]
